# Supplementary material for: Disorganized Gut Microbiome Contributed to Liver Cirrhosis Progression: A Meta-Omics-Based Study
Source: Front Microbiol. 2018 Dec 18;9:3166. doi: 10.3389/fmicb.2018.03166 (PMC6315199; doi:10.3389/fmicb.2018.03166)
Supplement: TABLE S5 — Detailed information on some edges enhanced in compensated patients as compared to healthy controls. [file Table_5.XLS]

## Sheet: Sheet1
Edge		H	C	D
Veillonella sp. ACP1	Veillonella.parvula	0.289325	0.623223	0.660413
Veillonella sp. ACP1	Veillonella.atypica	0.4363	0.797883	0.844902
Veillonella sp. ACP1	Veillonella.dispar	0.296709	0.577452	0.550626
Veillonella atypica	Veillonella.parvula	0.278932	0.657795	0.630798
Veillonella atypica	Haemophilus.parainfluenzae	0.236959	0.502108	NA
Veillonella dispar	Haemophilus.parainfluenzae	0.216748	0.468729	0.339711
Veillonella sp. ACP1	Haemophilus.parainfluenzae	0.235781	0.489251	0.351187
Veillonella atypica	Veillonella.dispar	0.227099	0.600876	0.582808
Veillonella sp. ACP1	Streptococcus.salivarius	0.193583	0.542829	0.299541
Veillonella parvula	Veillonella.dispar	0.170805	0.677664	0.55466
Veillonella parvula	Streptococcus.salivarius	0.16867	0.566985	0.329485
Bifidobacterium dentium	Streptococcus.salivarius	0.167152	0.235765	NA
Veillonella sp. ACP1	Bifidobacterium.dentium	0.16097	0.322749	0.526299
Bifidobacterium dentium	Haemophilus.parainfluenzae	0.158834	0.21115	NA
Veillonella parvula	Haemophilus.parainfluenzae	0.156677	0.620319	0.450082
Veillonella atypica	Streptococcus.salivarius	0.152617	0.570022	0.363421
Veillonella parvula	Bifidobacterium.dentium	0.111174	0.369948	0.39688
Veillonella dispar	Bifidobacterium.dentium	0.0644073	0.284248	0.375126
Streptococcus salivarius	Haemophilus.parainfluenzae	0.148381	0.469684	NA
Veillonella dispar	Streptococcus.salivarius	0.130456	0.478217	0.340618
Veillonella atypica	Bifidobacterium.dentium	0.122312	0.34483	0.467537
NA: not available
