# Supplementary material for: Disorganized Gut Microbiome Contributed to Liver Cirrhosis Progression: A Meta-Omics-Based Study
Source: Front Microbiol. 2018 Dec 18;9:3166. doi: 10.3389/fmicb.2018.03166 (PMC6315199; doi:10.3389/fmicb.2018.03166)
Supplement: TABLE S6 — Detailed information on retention time, molecular weight and VIP value for 75 differential metabolites. [file Table_6.XLS]

## Sheet: Sheet1
Rententiion time	Mass	VIP value	Identified metabolites
20.88	484.288	2.64524
15.9	347.22	2.535
20.68	257.226	2.33408
16.02	271.206	2.27758
16.02	331.226	2.2071
2.23	271.092	2.19316
2.23	139.049	2.16918
2.23	122.023	2.13036
20.89	341.246	2.02372
17.26	302.23	1.96757
4.18	98.0603	1.92321
9.91	304.21	1.90894
18.34	314.231	1.8916	decenoylcarnitine
2.6	124.075	1.88157
10.88	131.049	1.88089	cinnamic acid
18.49	342.173	1.86212
12.58	379.21	1.78764
20.77	209.116	1.7817
4.19	126.091	1.77676
1	100.075	1.76321
2.23	183.05	1.75692	methyluric acid
15.03	310.2	1.73722
14.03	247.132	1.72836
12.86	249.073	1.72267
18.11	338.232	1.71636
14.03	463.156	1.69953
14.29	310.2	1.67981
17.2	314.231	1.67687
9.82	272.185	1.67585
1.75	122.024	1.66361
16.02	255.211	1.65994
1.55	443.112	1.65581
14.03	151.074	1.65515
1.03	203.137	1.64538
7.61	297.088	1.64239
4.08	93.0333	1.64024
0.8	112.897	1.6371
19.55	257.156	1.62709
0.77	338.803	1.62388
1.13	282.118	1.61483	methyladenosine
12.87	265.038	1.61101
7.61	116.07	1.60656
12.87	121.065	1.6057	phenyllactic acid
7.86	154.086	1.60461
12.32	233.117	1.60162
0.99	269.123	1.60012
1.55	523.068	1.59991
2.14	240.09	1.59882
17.36	135.11	1.59809
14.03	479.124	1.58211
9.85	284.184	1.57646
6.41	265.118	1.57435	alpha-N-phenylacetyl-L-glutamine
12.87	167.069	1.57344
7.89	118.065	1.56389
7.68	146.06	1.55707
4.08	121.028	1.55495
13.56	479.228	1.55489
6.4	529.227	1.55433
12.38	84.0443	1.55155
5.87	77.0384	1.54827
0.86	227.125	1.54196
7.77	379.211	1.53815
14.6	241.144	1.53753
16.09	363.216	1.53372
1.55	704.142	1.52979
1.01	156.077	1.52358
13.59	151.076	1.52224
12.37	130.049	1.51894
2.13	346.054	1.51839
17.34	153.126	1.51409
14.03	265.142	1.5104
19.55	161.132	1.51006
12.87	751.211	1.50868
18	338.232	1.50527
2.03	203.08	1.50391
