# Supplementary material for: Disorganized Gut Microbiome Contributed to Liver Cirrhosis Progression: A Meta-Omics-Based Study
Source: Front Microbiol. 2018 Dec 18;9:3166. doi: 10.3389/fmicb.2018.03166 (PMC6315199; doi:10.3389/fmicb.2018.03166)
Supplement: TABLE S7 — Detailed information on functional annotations in various levels. [file Table_7.XLS]

## Sheet: Function.SigGenes
GeneID	SEEDfunction	Level1	Level2	Level3
LD64_revised_scaffold3338_1_gene68571	fig|1000588.3.peg.847__239__BEY_LIP__MurC__UDP-N-acetylmuramate--alanine_ligase_(EC_6.3.2.8)	Cofactors, Vitamins, Prosthetic Groups, Pigments	Lipoic acid	BEY LIP
HD8_revised_scaffold88791_1_gene168761	fig|1007096.3.peg.1025__207__Transcription_factors_bacterial__TrcF__Transcription-repair_coupling_factor	RNA Metabolism	Transcription	Transcription factors bacterial
HD8_revised_scaffold489_1_gene90499	fig|1007096.3.peg.1453__384__tRNA_processing__MiaA__tRNA_dimethylallyltransferase_(EC_2.5.1.75)	RNA Metabolism	RNA processing and modification	tRNA processing
HD5_revised_scaffold51604_5_gene80790	fig|1007096.3.peg.1467__1143__Phosphate_metabolism__PhoB__Phosphate_regulon_transcriptional_regulatory_protein_PhoB_(SphR)	Phosphorus Metabolism	-	Phosphate metabolism
HD8_revised_scaffold53309_2_gene186538	fig|1007096.3.peg.1774__305__YebC__Thr_syn__Threonyl-tRNA_synthetase_(EC_6.1.1.3)	Miscellaneous	Plant-Prokaryote comparative genomics	YebC
HD40_revised_C1434131_1_gene179599	fig|1007096.3.peg.1826__878__Isoprenoinds_for_Quinones__11__Undecaprenyl_diphosphate_synthase_(EC_2.5.1.31)	Fatty Acids, Lipids, and Isoprenoids	Isoprenoids	Isoprenoinds for Quinones
HD18_revised_C804849_1_gene29888	fig|1007096.3.peg.1857__311__YrdC-YciO__TsaC_short__TsaC_protein_(YrdC-Sua5_domains)_required_for_threonylcarbamoyladenosine_t(6)A37_modification_in_tRNA	RNA Metabolism	RNA processing and modification	YrdC-YciO
HD18_revised_scaffold34932_5_gene47752	fig|1007096.3.peg.1985__207__Transcription_factors_bacterial__NusB__Transcription_termination_protein_NusB	RNA Metabolism	Transcription	Transcription factors bacterial
HD18_revised_scaffold7317_5_gene45668	fig|1007096.3.peg.2461__804__Glycine_and_Serine_Utilization__GcvT__Aminomethyltransferase_(glycine_cleavage_system_T_protein)_(EC_2.1.2.10)	Amino Acids and Derivatives	Alanine, serine, and glycine	Glycine and Serine Utilization
HD18_revised_scaffold68433_1_gene13963	fig|1007096.3.peg.2660__664__DNA_repair,_bacterial_RecFOR_pathway__Ssb__Single-stranded_DNA-binding_protein	DNA Metabolism	DNA repair	DNA repair, bacterial RecFOR pathway
HD8_revised_scaffold9469_6_gene106191	fig|1007096.3.peg.2679__417__Biotin_biosynthesis__BioY__Substrate-specific_component_BioY_of_biotin_ECF_transporter	Cofactors, Vitamins, Prosthetic Groups, Pigments	Biotin	Biotin biosynthesis
HD37_revised_scaffold41017_1_gene63890	fig|1007096.3.peg.616__748__Fermentations:_Lactate__LDH_L__L-lactate_dehydrogenase_(EC_1.1.1.27)	Carbohydrates	Fermentation	Fermentations: Lactate
HD37_revised_C922407_1_gene95212	fig|1009412.3.peg.1570__457__CBSS-258594.1.peg.3339__R3__Glycosyltransferase	Clustering-based subsystems	Biosynthesis of galactoglycans and related lipopolysacharides	CBSS-258594.1.peg.3339
HD38_revised_scaffold20337_1_gene7849	fig|101031.3.peg.2186__675__De_Novo_Purine_Biosynthesis__YabJ__RidA/YER057c/UK114_superfamily_protein	Nucleosides and Nucleotides	Purines	De Novo Purine Biosynthesis
LD61_revised_scaffold14647_2_gene29962	fig|101031.3.peg.640__752__Flagellum__fliK__Flagellar_hook-length_control_protein_FliK	Motility and Chemotaxis	Flagellar motility in Prokaryota	Flagellum
HD47_revised_scaffold16856_6_gene7962	fig|102129.3.peg.2260__515__CO2_uptake,_carboxysome__Hat__High-affnity_carbon_uptake_protein_Hat/HatR	Carbohydrates	CO2 fixation	CO2 uptake, carboxysome
LD92_revised_scaffold28474_1_gene29948	fig|1028806.3.peg.171__983__Molybdenum_cofactor_biosynthesis__mobA__Molybdopterin-guanine_dinucleotide_biosynthesis_protein_MobA	Cofactors, Vitamins, Prosthetic Groups, Pigments	Folate and pterines	Molybdenum cofactor biosynthesis
HD8_revised_scaffold92736_1_gene170888	fig|1030842.4.peg.455__664__DNA_repair,_bacterial_RecFOR_pathway__RecJ__Single-stranded-DNA-specific_exonuclease_RecJ_(EC_3.1.-.-)	DNA Metabolism	DNA repair	DNA repair, bacterial RecFOR pathway
HD8_revised_scaffold92736_1_gene170889	fig|1030842.4.peg.456__1167__Plastidial_(p)ppGpp-mediated_response_in_plants__RelA/SpoT__GTP_pyrophosphokinase_(EC_2.7.6.5),_(p)ppGpp_synthetase_I	Regulation and Cell signaling	Signal transduction in Eukaryotes	Plastidial (p)ppGpp-mediated response in plants
HD37_revised_scaffold10930_4_gene19050	fig|1033730.3.peg.5063__635__D-Galacturonate_and_D-Glucuronate_Utilization__ExuT__Hexuronate_transporter	Carbohydrates	Monosaccharides	D-Galacturonate and D-Glucuronate Utilization
HD40_revised_scaffold101169_2_gene18482	fig|1033730.3.peg.5982__879__KDO2-Lipid_A_biosynthesis__LpxA__Acyl-[acyl-carrier-protein]--UDP-N-acetylglucosamine_O-acyltransferase_(EC_2.3.1.129)	Cell Wall and Capsule	Gram-Negative cell wall components	KDO2-Lipid A biosynthesis
HD43_revised_scaffold4938_2_gene103520	fig|1033730.3.peg.5982__879__KDO2-Lipid_A_biosynthesis__LpxA__Acyl-[acyl-carrier-protein]--UDP-N-acetylglucosamine_O-acyltransferase_(EC_2.3.1.129)	Cell Wall and Capsule	Gram-Negative cell wall components	KDO2-Lipid A biosynthesis
HD37_revised_scaffold31883_1_gene21583	fig|1033731.3.peg.2189__1233__Pyridoxin_(Vitamin_B6)_Biosynthesis__PdxA__4-hydroxythreonine-4-phosphate_dehydrogenase_(EC_1.1.1.262)	Cofactors, Vitamins, Prosthetic Groups, Pigments	Pyridoxine	Pyridoxin (Vitamin B6) Biosynthesis
HD35_revised_scaffold104714_2_gene105661	fig|1033731.3.peg.2452__608__ATP-dependent_RNA_helicases,_bacterial__RhlE__ATP-dependent_RNA_helicase_RhlE	RNA Metabolism	RNA processing and modification	ATP-dependent RNA helicases, bacterial
HD37_revised_scaffold10930_4_gene19049	fig|1033731.3.peg.654__635__D-Galacturonate_and_D-Glucuronate_Utilization__KdgA__4-Hydroxy-2-oxoglutarate_aldolase_(EC_4.1.3.16)_@_2-dehydro-3-deoxyphosphogluconate_aldolase_(EC_4.1.2.14)	Carbohydrates	Monosaccharides	D-Galacturonate and D-Glucuronate Utilization
HD35_revised_scaffold82182_4_gene31540	fig|1033732.3.peg.2767__719__Entner-Doudoroff_Pathway__PgK__Phosphoglycerate_kinase_(EC_2.7.2.3)	Carbohydrates	Central carbohydrate metabolism	Entner-Doudoroff Pathway
HD18_revised_scaffold68456_2_gene56666	fig|1033732.3.peg.2924__635__D-Galacturonate_and_D-Glucuronate_Utilization__Agu__Alpha-glucosidase_(EC_3.2.1.20)	Carbohydrates	Monosaccharides	D-Galacturonate and D-Glucuronate Utilization
HD23_revised_scaffold42338_1_gene76048	fig|1034346.3.peg.1165__827__Heat_shock_dnaK_gene_cluster_extended__RdgB__Nucleoside_5-triphosphatase_RdgB_(dHAPTP,_dITP,_XTP-specific)_(EC_3.6.1.15)	Stress Response	Heat shock	Heat shock dnaK gene cluster extended
HD82_revised_scaffold24489_1_gene58804	fig|1034769.3.peg.1377__837__High_affinity_phosphate_transporter_and_control_of_PHO_regulon__PhoR__Phosphate_regulon_sensor_protein_PhoR_(SphS)_(EC_2.7.13.3)	Phosphorus Metabolism	-	High affinity phosphate transporter and control of PHO regulon
HD35_revised_scaffold14060_4_gene152778	fig|1034769.3.peg.2872__989__Multidrug_Resistance_Efflux_Pumps__NorM__Multi_antimicrobial_extrusion_protein_(Na(+)/drug_antiporter),_MATE_family_of_MDR_efflux_pumps	Virulence	Resistance to antibiotics and toxic compounds	Multidrug Resistance Efflux Pumps
LD38_revised_scaffold5138_1_gene78118	fig|1034769.3.peg.5030__996__Murein_hydrolase_regulation_and_cell_death__lytS__Autolysis_histidine_kinase_LytS	Regulation and Cell signaling	Programmed Cell Death and Toxin-antitoxin Systems	Murein hydrolase regulation and cell death
LD33_revised_scaffold51057_3_gene1229	fig|1035194.3.peg.207__1056__Nitrate_and_nitrite_ammonification__NaNiRR__Nitrate/nitrite_response_regulator_protein_NarP	Nitrogen Metabolism	-	Nitrate and nitrite ammonification
LD60_revised_C860610_1_gene60838	fig|1035308.3.peg.3429__142__Synthesis_of_osmoregulated_periplasmic_glucans__CgmB__Cyclic_beta-1,2-glucan_modification_transmembrane_protein	Stress Response	Osmotic stress	Synthesis of osmoregulated periplasmic glucans
HD8_revised_scaffold8835_3_gene158958	fig|1035308.3.peg.3576__882__Ketoisovalerate_oxidoreductase__ACoAS__Acetyl-coenzyme_A_synthetase_(EC_6.2.1.1)	Amino Acids and Derivatives	Branched-chain amino acids	Ketoisovalerate oxidoreductase
HD18_revised_scaffold54714_1_gene50174	fig|1035308.3.peg.3993__654__DNA_processing_cluster__Topo-III__DNA_topoisomerase_III_(EC_5.99.1.2)	DNA Metabolism	DNA uptake, competence	DNA processing cluster
LD33_revised_scaffold28553_2_gene62707	fig|1035308.3.peg.5239__665__DNA_repair,_bacterial_UmuCD_system__LexA__SOS-response_repressor_and_protease_LexA_(EC_3.4.21.88)	DNA Metabolism	DNA repair	DNA repair, bacterial UmuCD system
HD38_revised_scaffold35900_1_gene20562	fig|103690.10.peg.3409__834__Heterocyst_formation_in_cyanobacteria__HetC__Heterocyst_differentiation_protein_HetC	Cell Division and Cell Cycle	-	Heterocyst formation in cyanobacteria
LD61_revised_scaffold19746_2_gene14082	fig|1038929.3.peg.1969__1183__Potassium_homeostasis__kefA__Potassium_efflux_system_KefA_protein_/_Small-conductance_mechanosensitive_channel	Potassium metabolism	-	Potassium homeostasis
HD37_revised_scaffold17043_2_gene12522	fig|1040979.3.peg.748__461__CBSS-265072.7.peg.546__R7__Transcriptional_regulator_containing_an_amidase_domain_and_an_AraC-type_DNA-binding_HTH_domain	Clustering-based subsystems	Methylamine utilization	CBSS-265072.7.peg.546
LD85_revised_scaffold14818_1_gene89934	fig|1041057.4.peg.2353__833__Hemin_transport_system__Rp2__Outer_membrane_receptor_proteins,_mostly_Fe_transport	Iron acquisition and metabolism	-	Hemin transport system
HD35_revised_scaffold21977_2_gene171054	fig|1041522.3.peg.4439__1183__Potassium_homeostasis__KdpD__Osmosensitive_K+_channel_histidine_kinase_KdpD_(EC_2.7.3.-)	Potassium metabolism	-	Potassium homeostasis
HD1_revised_scaffold42030_1_gene52118	fig|1042156.4.peg.2640__276__Urea_decomposition__UreD__Urease_accessory_protein_UreD	Amino Acids and Derivatives	Arginine; urea cycle, polyamines	Urea decomposition
HD1_revised_scaffold42030_1_gene52122	fig|1042156.4.peg.2645__276__Urea_decomposition__UreC__Urease_alpha_subunit_(EC_3.5.1.5)	Amino Acids and Derivatives	Arginine; urea cycle, polyamines	Urea decomposition
HD37_revised_scaffold49324_1_gene94605	fig|1046627.3.peg.2909__1044__NAD_and_NADP_cofactor_biosynthesis_global__RNK_b__Ribosylnicotinamide_kinase_(EC_2.7.1.22)_/_Unknown_conserved_in_Flavobacteria	Cofactors, Vitamins, Prosthetic Groups, Pigments	NAD and NADP	NAD and NADP cofactor biosynthesis global
HD12_revised_scaffold171_2_gene73580	fig|1047055.3.peg.1112__1143__Phosphate_metabolism__PhoB__Phosphate_regulon_transcriptional_regulatory_protein_PhoB_(SphR)	Phosphorus Metabolism	-	Phosphate metabolism
LD5_revised_C372812_1_gene11019	fig|1049789.4.peg.3215__1183__Potassium_homeostasis__kefA__Potassium_efflux_system_KefA_protein_/_Small-conductance_mechanosensitive_channel	Potassium metabolism	-	Potassium homeostasis
HD8_revised_scaffold108612_2_gene187693	fig|1049982.3.peg.1147__311__YrdC-YciO__YgjD__TsaD/Kae1/Qri7_protein,_required_for_threonylcarbamoyladenosine_t(6)A37_formation_in_tRNA	RNA Metabolism	RNA processing and modification	YrdC-YciO
HD38_revised_scaffold38924_1_gene37902	fig|1050201.3.peg.43__1043__N-linked_Glycosylation_in_Bacteria__GalE__UDP-glucose_4-epimerase_(EC_5.1.3.2)	Protein Metabolism	Protein processing and modification	N-linked Glycosylation in Bacteria
HD37_revised_C926819_1_gene11457	fig|1050222.3.peg.245__635__D-Galacturonate_and_D-Glucuronate_Utilization__XynA1__Endo-1,4-beta-xylanase_A_precursor_(EC_3.2.1.8)	Carbohydrates	Monosaccharides	D-Galacturonate and D-Glucuronate Utilization
LD61_revised_scaffold9220_1_gene26280	fig|1050222.3.peg.245__635__D-Galacturonate_and_D-Glucuronate_Utilization__XynA1__Endo-1,4-beta-xylanase_A_precursor_(EC_3.2.1.8)	Carbohydrates	Monosaccharides	D-Galacturonate and D-Glucuronate Utilization
LD85_revised_scaffold2376_4_gene111724	fig|1051075.5.peg.3126__708__EC_6.3.4.-_Ligases_that_form_carbon-nitrogen_bonds__AccB__Biotin_carboxyl_carrier_protein_of_acetyl-CoA_carboxylase	Miscellaneous	-	EC 6.3.4.- Ligases that form carbon-nitrogen bonds
HD16_revised_scaffold36537_2_gene44982	fig|1053167.3.peg.2612__800__Glycerol_and_Glycerol-3-phosphate_Uptake_and_Utilization__GpsA__Glycerol-3-phosphate_dehydrogenase_[NAD(P)+]_(EC_1.1.1.94)	Carbohydrates	Sugar alcohols	Glycerol and Glycerol-3-phosphate Uptake and Utilization
LD45_revised_C586549_1_gene14269	fig|1053175.3.peg.6425__991__Multidrug_Resistance,_2-protein_version_Found_in_Gram-positive_bacteria__B__Membrane_component_of_multidrug_resistance_system	Virulence	Resistance to antibiotics and toxic compounds	Multidrug Resistance, 2-protein version Found in Gram-positive bacteria
HD82_revised_scaffold11325_2_gene20735	fig|1053179.3.peg.850__991__Multidrug_Resistance,_2-protein_version_Found_in_Gram-positive_bacteria__Reg__TetR_family_regulatory_protein_of_MDR_cluster	Virulence	Resistance to antibiotics and toxic compounds	Multidrug Resistance, 2-protein version Found in Gram-positive bacteria
LD96_revised_scaffold30938_1_gene16439	fig|1053202.3.peg.1689__314__Bacitracin_Stress_Response__YvcR__ABC_transporter_ATP-binding_protein_YvcR	Virulence, Disease and Defense	Bacteriocins, ribosomally synthesized antibacterial peptides	Bacitracin Stress Response
HD12_revised_scaffold44048_1_gene80562	fig|1053231.3.peg.773__586__Cobalt-zinc-cadmium_resistance__TRMer__Transcriptional_regulator,_MerR_family	Virulence	Resistance to antibiotics and toxic compounds	Cobalt-zinc-cadmium resistance
HD8_revised_scaffold112231_1_gene5870	fig|1053242.3.peg.4220__261__Bacillibactin_Siderophore__yuiI__Trilactone_hydrolase_[bacillibactin]_siderophore	Iron acquisition and metabolism	Siderophores	Bacillibactin Siderophore
LD61_revised_scaffold8314_6_gene15893	fig|1053246.3.peg.674__98__Spore_germination__GerN__Spore_germination_protein_GerN_(inosine-dependent_germination),_Na+/H+_antiporter	Dormancy and Sporulation	-	Spore germination
LD85_revised_scaffold10770_2_gene64903	fig|1068978.3.peg.1425__647__D-ribose_utilization__RbsA__Ribose_ABC_transport_system,_ATP-binding_protein_RbsA_(TC_3.A.1.2.1)	Carbohydrates	Monosaccharides	D-ribose utilization
LD33_revised_scaffold51218_1_gene61376	fig|1068978.3.peg.3591__570__Choline_and_Betaine_Uptake_and_Betaine_Biosynthesis__BetI__HTH-type_transcriptional_regulator_BetI	Stress Response	Osmotic stress	Choline and Betaine Uptake and Betaine Biosynthesis
HD23_revised_scaffold41143_2_gene15201	fig|1069080.3.peg.1466__477__A_TRAP_transporter_and_a_hypothetical__DctP__TRAP_transporter_solute_receptor,_unknown_substrate_1	Membrane Transport	TRAP transporters	A TRAP transporter and a hypothetical
HD23_revised_scaffold41143_2_gene15211	fig|1069080.3.peg.856__190__Threonine_and_Homoserine_Biosynthesis__ThrA__Aspartokinase_(EC_2.7.2.4)	Amino Acids and Derivatives	Lysine, threonine, methionine, and cysteine	Threonine and Homoserine Biosynthesis
HD23_revised_scaffold41143_2_gene15212	fig|1069080.3.peg.857__190__Threonine_and_Homoserine_Biosynthesis__Asd__Aspartate-semialdehyde_dehydrogenase_(EC_1.2.1.11)	Amino Acids and Derivatives	Lysine, threonine, methionine, and cysteine	Threonine and Homoserine Biosynthesis
HD37_revised_C907533_1_gene60329	fig|1073351.3.peg.578__779__Galactosylceramide_and_Sulfatide_metabolism__bGS__Alpha-L-fucosidase_(EC_3.2.1.51)	Sulfur Metabolism	-	Galactosylceramide and Sulfatide metabolism
LD33_revised_scaffold26230_2_gene31825	fig|1073351.3.peg.712__635__D-Galacturonate_and_D-Glucuronate_Utilization__RhiN__Rhamnogalacturonides_degradation_protein_RhiN	Carbohydrates	Monosaccharides	D-Galacturonate and D-Glucuronate Utilization
LD21_revised_scaffold18555_1_2_gene74525	fig|1073569.3.peg.1762__969__Methionine_Biosynthesis__MetE__5-methyltetrahydropteroyltriglutamate--homocysteine_methyltransferase_(EC_2.1.1.14)	Amino Acids and Derivatives	Lysine, threonine, methionine, and cysteine	Methionine Biosynthesis
LD57_revised_scaffold1274_3_gene34978	fig|1073571.3.peg.899__350__pyrimidine_conversions__nt5__5-nucleotidase_(EC_3.1.3.5)	Nucleosides and Nucleotides	Pyrimidines	pyrimidine conversions
HD12_revised_scaffold6399_3_gene20348	fig|1074494.5.peg.1896__167__Test_-_DHFR__MetE__5-methyltetrahydropteroyltriglutamate--homocysteine_methyltransferase_(EC_2.1.1.14)	Cofactors, Vitamins, Prosthetic Groups, Pigments	-	Test - DHFR
LD30_revised_scaffold52375_1_gene118216	fig|1075768.5.peg.552__403__Beta-lactamase__BLD__Beta-lactamase_class_D	Virulence	Resistance to antibiotics and toxic compounds	Beta-lactamase
HD37_revised_scaffold44032_1_gene73936	fig|1078083.3.peg.1798__1143__Phosphate_metabolism__AP__Alkaline_phosphatase_(EC_3.1.3.1)	Phosphorus Metabolism	-	Phosphate metabolism
HD54_revised_scaffold28531_2_gene17444	fig|1078089.3.peg.1033__635__D-Galacturonate_and_D-Glucuronate_Utilization__RhiN__Rhamnogalacturonides_degradation_protein_RhiN	Carbohydrates	Monosaccharides	D-Galacturonate and D-Glucuronate Utilization
HD37_revised_scaffold14458_2_gene71175	fig|1078089.3.peg.266__269__Unknown_sugar_utilization_(cluster_yphABCDEFG)__YphG__Uncharacterized_protein_YphG,_TPR-domain_containing	Carbohydrates	-	Unknown sugar utilization (cluster yphABCDEFG)
HD35_revised_scaffold107762_1_gene106476	fig|1078089.3.peg.3620__596__Colanic_acid_biosynthesis__wzx__Lipopolysaccharide_biosynthesis_protein_WzxC	Cell Wall and Capsule	Capsular and extracellular polysacchrides	Colanic acid biosynthesis
HD12_revised_scaffold44048_1_gene80531	fig|1078090.3.peg.1986__893__LOS_core_oligosaccharide_biosynthesis__Glf__UDP-galactopyranose_mutase_(EC_5.4.99.9)	Cell Wall and Capsule	Gram-Negative cell wall components	LOS core oligosaccharide biosynthesis
HD12_revised_scaffold171_2_gene73603	fig|1078090.3.peg.2923__455__A_Gram-positive_cluster_that_relates_ribosomal_protein_L28P_to_a_set_of_uncharacterized_proteins__R4__Serine/threonine_protein_kinase_PrkC,_regulator_of_stationary_phase	Clustering-based subsystems	Ribosomal Protein L28P relates to a set of uncharacterized proteins	A Gram-positive cluster that relates ribosomal protein L28P to a set of uncharacterized proteins
LD7_revised_scaffold15449_1_gene8335	fig|1078091.3.peg.419__611__Copper_homeostasis__CIA__Lead,_cadmium,_zinc_and_mercury_transporting_ATPase_(EC_3.6.3.3)_(EC_3.6.3.5);_Copper-translocating_P-type_ATPase_(EC_3.6.3.4)	Virulence	Resistance to antibiotics and toxic compounds	Copper homeostasis
HD35_revised_scaffold14151_8_gene163670	fig|1078091.3.peg.663__551__ABC_transporter_oligopeptide_(TC_3.A.1.5.1)__oppA__Oligopeptide_ABC_transporter,_periplasmic_oligopeptide-binding_protein_OppA_(TC_3.A.1.5.1)	Membrane Transport	ABC transporters	ABC transporter oligopeptide (TC 3.A.1.5.1)
HD12_revised_scaffold171_2_gene73617	fig|1078846.3.peg.3715__323__cAMP_signaling_in_bacteria__AC__Adenylate_cyclase_(EC_4.6.1.1)	Regulation and Cell signaling	-	cAMP signaling in bacteria
LD24_revised_scaffold36353_1_gene83464	fig|1080187.3.peg.1890__323__cAMP_signaling_in_bacteria__AC__Adenylate_cyclase_(EC_4.6.1.1)_/_Guanylate_cyclase_(EC_4.6.1.2)	Regulation and Cell signaling	-	cAMP signaling in bacteria
HD8_revised_scaffold81787_1_gene185142	fig|1085.1.peg.3540__448__CBSS-216592.1.peg.3534__R1__CRISPR-associated_protein_Cas1	Clustering-based subsystems	CRISPRs and associated hypotheticals	CBSS-216592.1.peg.3534
HD38_revised_C522912_1_gene69208	fig|1089547.3.peg.1944__457__CBSS-258594.1.peg.3339__R3__Glycosyltransferase	Clustering-based subsystems	Biosynthesis of galactoglycans and related lipopolysacharides	CBSS-258594.1.peg.3339
HD8_revised_scaffold110852_2_gene65368	fig|1094188.3.peg.789__1078__Omega-amidase_KE2__DAPDC__Diaminopimelate_decarboxylase_(EC_4.1.1.20)	Miscellaneous	Plant-Prokaryote comparative genomics	Omega-amidase KE2
LD33_revised_scaffold38946_4_gene55391	fig|1095736.3.peg.17__785__Glutamate_transporter_involved_in_acid_tolerance_in_Streptococcus__GltB__Glutamate_transport_substrate-binding_protein	Stress Response	Acid stress	Glutamate transporter involved in acid tolerance in Streptococcus
LD78_revised_C609406_1_gene82901	fig|1095746.3.peg.1491__350__pyrimidine_conversions__nt5__UDP-sugar_hydrolase_(EC_3.6.1.45);_5-nucleotidase_(EC_3.1.3.5)	Nucleosides and Nucleotides	Pyrimidines	pyrimidine conversions
LD92_revised_C414394_1_gene29310	fig|1095746.3.peg.335__384__tRNA_processing__Rnd__Ribonuclease_D_(EC_3.1.26.3)	RNA Metabolism	RNA processing and modification	tRNA processing
LD47_revised_scaffold41910_1_gene87888	fig|1095746.3.peg.490__604__Competence_or_DNA_damage-inducible_protein_CinA_and_related_protein_families__ThPK__Thiamine-monophosphate_kinase_(EC_2.7.4.16)	Miscellaneous	Plant-Prokaryote comparative genomics	Competence or DNA damage-inducible protein CinA and related protein families
HD37_revised_scaffold187_2_gene77819	fig|1095771.3.peg.2341__759__Folate_Biosynthesis__FolCDHFS__Dihydrofolate_synthase_(EC_6.3.2.12)_@_Folylpolyglutamate_synthase_(EC_6.3.2.17)	Cofactors, Vitamins, Prosthetic Groups, Pigments	Folate and pterines	Folate Biosynthesis
HD16_revised_scaffold55375_1_gene80320	fig|1105031.3.peg.1153__207__Transcription_factors_bacterial__COG2740__COG2740:_Predicted_nucleic-acid-binding_protein_implicated_in_transcription_termination	RNA Metabolism	Transcription	Transcription factors bacterial
HD16_revised_scaffold55316_1_gene5148	fig|1105031.3.peg.3328__233__Tryptophan_synthesis__trpB__Anthranilate_phosphoribosyltransferase_(EC_2.4.2.18)	Amino Acids and Derivatives	Aromatic amino acids and derivatives	Tryptophan synthesis
LD85_revised_scaffold30139_2_gene105219	fig|1111106.3.peg.2078__1143__Phosphate_metabolism__AP__Alkaline_phosphatase_(EC_3.1.3.1)	Phosphorus Metabolism	-	Phosphate metabolism
LD33_revised_scaffold47584_3_gene65886	fig|1114959.3.peg.1023__713__ESAT-6_proteins_secretion_system_in_Mycobacteria_(locus_ESX-1)__Rv3877__Integral_membrane_protein_EccD1,_component_of_Type_VII_secretion_system_ESX-1	Membrane Transport	Protein secretion system, Type VII	ESAT-6 proteins secretion system in Mycobacteria (locus ESX-1)
HD35_revised_scaffold28973_10_gene120889	fig|1116070.3.peg.1152__410__Biofilm_Adhesin_Biosynthesis__PgaC__Biofilm_PGA_synthesis_N-glycosyltransferase_PgaC_(EC_2.4.-.-)	Regulation and Cell signaling	Quorum sensing and biofilm formation	Biofilm Adhesin Biosynthesis
HD38_revised_scaffold14360_1_gene1639	fig|1116220.3.peg.2838__934__MRSA_analysis_Oli__ABC_ATP__ABC_transporter,_ATP-binding_protein	Virulence, Disease and Defense	-	MRSA analysis Oli
HD12_revised_scaffold6399_3_gene20323	fig|1118154.3.peg.2169__1246__Queuosine_exploration_RZ__Trans4__Permease_of_the_drug/metabolite_transporter_(DMT)_superfamily	RNA Metabolism	RNA processing and modification	Queuosine exploration RZ
LD33_revised_scaffold48052_1_gene39925	fig|1118157.3.peg.3022__806__Glycine_reductase,_sarcosine_reductase_and_betaine_reductase__TrxA__Thioredoxin	Protein Metabolism	Selenoproteins	Glycine reductase, sarcosine reductase and betaine reductase
HD12_revised_scaffold2528_4_gene81673	fig|1118158.3.peg.390__1074__O-Methyl_Phosphoramidate_Capsule_Modification_in_Campylobacter__Cj1417__Putative_amidotransferase_(Type_1_glutamine_amidotransferase_-_GATase1)	Cell Wall and Capsule	Capsular and extracellular polysacchrides	O-Methyl Phosphoramidate Capsule Modification in Campylobacter
LD38_revised_scaffold46901_1_gene5844	fig|1120917.3.peg.2180__910__Lipid-linked_oligosaccharide_synthesis_related_cluster__DPM1__Dolichol-phosphate_mannosyltransferase_(EC_2.4.1.83)_in_lipid-linked_oligosaccharide_synthesis_cluster	Cell Wall and Capsule	Capsular and extracellular polysacchrides	Lipid-linked oligosaccharide synthesis related cluster
LD33_revised_scaffold52552_1_gene9764	fig|1120917.3.peg.630__570__Choline_and_Betaine_Uptake_and_Betaine_Biosynthesis__BetI__HTH-type_transcriptional_regulator_BetI	Stress Response	Osmotic stress	Choline and Betaine Uptake and Betaine Biosynthesis
LD61_revised_scaffold24853_1_gene53104	fig|1120949.3.peg.942__1246__Queuosine_exploration_RZ__Trans4__Permease_of_the_drug/metabolite_transporter_(DMT)_superfamily	RNA Metabolism	RNA processing and modification	Queuosine exploration RZ
HD8_revised_scaffold110929_1_gene167472	fig|1120949.3.peg.942__1246__Queuosine_exploration_RZ__Trans4__Permease_of_the_drug/metabolite_transporter_(DMT)_superfamily	RNA Metabolism	RNA processing and modification	Queuosine exploration RZ
HD81_revised_C833101_1_gene120570	fig|1120950.3.peg.33__788__Glutamine,_Glutamate,_Aspartate_and_Asparagine_Biosynthesis__AsnB1__Asparagine_synthetase_[glutamine-hydrolyzing]_(EC_6.3.5.4)	Amino Acids and Derivatives	Glutamine, glutamate, aspartate, asparagine; ammonia assimilation	Glutamine, Glutamate, Aspartate and Asparagine Biosynthesis
LD4_revised_scaffold42722_1_gene8610	fig|1120950.3.peg.4760__910__Lipid-linked_oligosaccharide_synthesis_related_cluster__DPM1__Dolichol-phosphate_mannosyltransferase_(EC_2.4.1.83)_in_lipid-linked_oligosaccharide_synthesis_cluster	Cell Wall and Capsule	Capsular and extracellular polysacchrides	Lipid-linked oligosaccharide synthesis related cluster
HD37_revised_scaffold51260_1_gene31232	fig|1120974.3.peg.1018__811__Glycolysis_and_Gluconeogenesis,_including_Archaeal_enzymes__PfK1__6-phosphofructokinase_(EC_2.7.1.11)	Carbohydrates	Central carbohydrate metabolism	Glycolysis and Gluconeogenesis, including Archaeal enzymes
HD18_revised_scaffold54307_2_gene68269	fig|1120974.3.peg.1115__164__Terminal_cytochrome_d_ubiquinol_oxidases__CydB__Cytochrome_d_ubiquinol_oxidase_subunit_II_(EC_1.10.3.-)	Respiration	Electron accepting reactions	Terminal cytochrome d ubiquinol oxidases
HD35_revised_scaffold57682_1_gene121434	fig|1120974.3.peg.1253__424__Branched-Chain_Amino_Acid_Biosynthesis__IlvG__Acetolactate_synthase_large_subunit_(EC_2.2.1.6)	Amino Acids and Derivatives	Branched-chain amino acids	Branched-Chain Amino Acid Biosynthesis
HD37_revised_scaffold17688_1_gene62147	fig|1120974.3.peg.1262__893__LOS_core_oligosaccharide_biosynthesis__CTDG__Putative_two-domain_glycosyltransferase	Cell Wall and Capsule	Gram-Negative cell wall components	LOS core oligosaccharide biosynthesis
HD37_revised_scaffold17688_1_gene62148	fig|1120974.3.peg.1263__155__Teichoic_and_lipoteichoic_acids_biosynthesis__TagB__CDP-glycerol:_N-acetyl-beta-D-mannosaminyl-1,4-N-acetyl-D-glucosaminyldiphosphoundecaprenyl_glycerophosphotransferase	Cell Wall and Capsule	Gram-Positive cell wall components	Teichoic and lipoteichoic acids biosynthesis
HD47_revised_C517010_1_gene11259	fig|1120974.3.peg.1281__605__Conjugative_transposon,_Bacteroidales__BF0132__Putative_conjugative_transposon_mobilization_protein_BF0132	Phages, Prophages, Transposable elements, Plasmids	Transposable elements	Conjugative transposon, Bacteroidales
HD16_revised_scaffold1026_3_gene43867	fig|1120974.3.peg.1282__605__Conjugative_transposon,_Bacteroidales__BF0132__Putative_conjugative_transposon_mobilization_protein_BF0132	Phages, Prophages, Transposable elements, Plasmids	Transposable elements	Conjugative transposon, Bacteroidales
HD16_revised_scaffold1026_3_gene43869	fig|1120974.3.peg.1283__605__Conjugative_transposon,_Bacteroidales__BF0131__hypothetical_protein_clusted_with_conjugative_transposons,_BF0131	Phages, Prophages, Transposable elements, Plasmids	Transposable elements	Conjugative transposon, Bacteroidales
HD35_revised_scaffold35799_1_gene7770	fig|1120974.3.peg.1371__528__Calvin-Benson_cycle__TPI__Triosephosphate_isomerase_(EC_5.3.1.1)	Carbohydrates	CO2 fixation	Calvin-Benson cycle
LD24_revised_scaffold35197_2_gene86430	fig|1120974.3.peg.1423__1164__Arginine_Biosynthesis_extended__ArgE__Acetylornithine_deacetylase_(EC_3.5.1.16)	Amino Acids and Derivatives	Arginine; urea cycle, polyamines	Arginine Biosynthesis extended
HD18_revised_scaffold63858_1_gene18692	fig|1120974.3.peg.1457__348__pVir_Plasmid_of_Campylobacter__Cjp12__DNA_topoisomerase_I_(EC_5.99.1.2)	Membrane Transport	Protein and nucleoprotein secretion system, Type IV	pVir Plasmid of Campylobacter
HD37_revised_scaffold32490_1_gene1059	fig|1120974.3.peg.1466__325__cell_division_cluster_containing_FtsQ__FtsA__Cell_division_protein_FtsA	Clustering-based subsystems	Cell Division	cell division cluster containing FtsQ
HD37_revised_scaffold45856_1_gene22021	fig|1120974.3.peg.1480__996__Murein_hydrolase_regulation_and_cell_death__CDA__Cytidine_deaminase_(EC_3.5.4.5)	Regulation and Cell signaling	Programmed Cell Death and Toxin-antitoxin Systems	Murein hydrolase regulation and cell death
HD37_revised_scaffold19099_2_gene79460	fig|1120974.3.peg.1494__1246__Queuosine_exploration_RZ__Trans4__Permease_of_the_drug/metabolite_transporter_(DMT)_superfamily	RNA Metabolism	RNA processing and modification	Queuosine exploration RZ
LD25_revised_C542524_1_gene89059	fig|1120974.3.peg.1583__605__Conjugative_transposon,_Bacteroidales__TraB-CTn__Conjugative_transposon_protein_TraB	Phages, Prophages, Transposable elements, Plasmids	Transposable elements	Conjugative transposon, Bacteroidales
HD37_revised_scaffold35032_2_gene38214	fig|1120974.3.peg.1672__155__Teichoic_and_lipoteichoic_acids_biosynthesis__PGPP__Poly(glycerol-phosphate)_alpha-glucosyltransferase_(EC_2.4.1.52)	Cell Wall and Capsule	Gram-Positive cell wall components	Teichoic and lipoteichoic acids biosynthesis
HD37_revised_scaffold35032_2_gene38215	fig|1120974.3.peg.1673__224__Trehalose_Biosynthesis__AmyA__Alpha-amylase_(EC_3.2.1.1)	Carbohydrates	Di- and oligosaccharides	Trehalose Biosynthesis
HD35_revised_C1478050_1_gene152916	fig|1120974.3.peg.1805__989__Multidrug_Resistance_Efflux_Pumps__CmeB__RND_efflux_system,_inner_membrane_transporter_CmeB	Virulence	Resistance to antibiotics and toxic compounds	Multidrug Resistance Efflux Pumps
HD18_revised_scaffold202_7_gene27262	fig|1120974.3.peg.1878__1083__Osmoregulation__Glycerol__Glycerol_uptake_facilitator_protein	Stress Response	Osmotic stress	Osmoregulation
HD37_revised_scaffold49736_1_gene57299	fig|1120974.3.peg.1893__1040__N-Acetyl-Galactosamine_and_Galactosamine_Utilization__bHx__Beta-hexosaminidase_(EC_3.2.1.52)	Carbohydrates	Aminosugars	N-Acetyl-Galactosamine and Galactosamine Utilization
HD37_revised_scaffold17240_1_gene51951	fig|1120974.3.peg.1922__806__Glycine_reductase,_sarcosine_reductase_and_betaine_reductase__TrxA__Thioredoxin	Protein Metabolism	Selenoproteins	Glycine reductase, sarcosine reductase and betaine reductase
HD8_revised_scaffold37447_2_gene120729	fig|1120974.3.peg.1940__800__Glycerol_and_Glycerol-3-phosphate_Uptake_and_Utilization__GlpT__Glycerol-3-phosphate_transporter	Carbohydrates	Sugar alcohols	Glycerol and Glycerol-3-phosphate Uptake and Utilization
HD51_revised_scaffold24434_5_gene98264	fig|1120974.3.peg.1959__800__Glycerol_and_Glycerol-3-phosphate_Uptake_and_Utilization__UdpQ__Glycerophosphoryl_diester_phosphodiesterase_(EC_3.1.4.46)	Carbohydrates	Sugar alcohols	Glycerol and Glycerol-3-phosphate Uptake and Utilization
HD18_revised_scaffold1221_2_gene73074	fig|1120974.3.peg.1978__989__Multidrug_Resistance_Efflux_Pumps__CmeA__RND_efflux_system,_membrane_fusion_protein_CmeA	Virulence	Resistance to antibiotics and toxic compounds	Multidrug Resistance Efflux Pumps
LD30_revised_scaffold11832_1_gene119017	fig|1120974.3.peg.1997__661__DNA_repair,_bacterial_RecBCD_pathway__Atu2026__RecD-like_DNA_helicase_Atu2026	DNA Metabolism	DNA repair	DNA repair, bacterial RecBCD pathway
HV7_revised_scaffold32030_1_gene80952	fig|1120974.3.peg.2033__207__Transcription_factors_bacterial__UpdY__Transcription_antitermination_protein_UpdY	RNA Metabolism	Transcription	Transcription factors bacterial
HD18_revised_scaffold68456_3_gene64312	fig|1120974.3.peg.2223__199__Ton_and_Tol_transport_systems__TonBR__TonB-dependent_receptor	Membrane Transport	-	Ton and Tol transport systems
LD33_revised_scaffold9641_4_gene26667	fig|1120974.3.peg.2376__945__Mannose_Metabolism__MnnA_16__Alpha-1,2-mannosidase	Carbohydrates	Monosaccharides	Mannose Metabolism
HD6_revised_scaffold32111_3_gene61810	fig|1120974.3.peg.2407__676__De_Novo_Pyrimidine_Synthesis__pyrC__Dihydroorotase_(EC_3.5.2.3)	Nucleosides and Nucleotides	Pyrimidines	De Novo Pyrimidine Synthesis
HD18_revised_scaffold13832_3_gene20563	fig|1120974.3.peg.2452__779__Galactosylceramide_and_Sulfatide_metabolism__bGS__Beta-galactosidase_(EC_3.2.1.23)	Sulfur Metabolism	-	Galactosylceramide and Sulfatide metabolism
HD18_revised_scaffold13832_3_gene20561	fig|1120974.3.peg.2455__210__Transcription_initiation,_bacterial_sigma_factors__RpoN__RNA_polymerase_sigma-54_factor_RpoN	RNA Metabolism	Transcription	Transcription initiation, bacterial sigma factors
HD37_revised_scaffold51498_1_gene18222	fig|1120974.3.peg.2469__941__Maltose_and_Maltodextrin_Utilization__Amy__Alpha-amylase_(EC_3.2.1.1)	Carbohydrates	Di- and oligosaccharides	Maltose and Maltodextrin Utilization
HD35_revised_scaffold27990_2_gene139508	fig|1120974.3.peg.2481__945__Mannose_Metabolism__ManC__Mannose-1-phosphate_guanylyltransferase_(GDP)_(EC_2.7.7.22)	Carbohydrates	Monosaccharides	Mannose Metabolism
HD30_revised_scaffold23585_2_gene3722	fig|1120974.3.peg.2499__660__DNA_repair,_bacterial_MutL-MutS_system__MutS-fam1__MutS-related_protein,_family_1	DNA Metabolism	DNA repair	DNA repair, bacterial MutL-MutS system
LD17_revised_scaffold48763_1_gene77791	fig|1120974.3.peg.2546__19__Ribonuclease_H__RNaseHI__Ribonuclease_HI_(EC_3.1.26.4)	RNA Metabolism	RNA processing and modification	Ribonuclease H
LD84_revised_scaffold55034_2_gene66872	fig|1120974.3.peg.2610__1242__Pyruvate_metabolism_I:_anaplerotic_reactions,_PEP__ME_P__NADP-dependent_malic_enzyme_(EC_1.1.1.40)	Carbohydrates	Central carbohydrate metabolism	Pyruvate metabolism I: anaplerotic reactions, PEP
HD8_revised_scaffold30042_1_gene95229	fig|1120974.3.peg.2610__1242__Pyruvate_metabolism_I:_anaplerotic_reactions,_PEP__ME_P__NADP-dependent_malic_enzyme_(EC_1.1.1.40)	Carbohydrates	Central carbohydrate metabolism	Pyruvate metabolism I: anaplerotic reactions, PEP
HD35_revised_scaffold57682_1_gene121430	fig|1120974.3.peg.2656__945__Mannose_Metabolism__ManA__Mannose-6-phosphate_isomerase_(EC_5.3.1.8)	Carbohydrates	Monosaccharides	Mannose Metabolism
HD37_revised_scaffold23000_1_gene63450	fig|1120974.3.peg.2662__779__Galactosylceramide_and_Sulfatide_metabolism__bGS__Beta-galactosidase_(EC_3.2.1.23)	Sulfur Metabolism	-	Galactosylceramide and Sulfatide metabolism
LD24_revised_scaffold568_3_gene45814	fig|1120974.3.peg.2662__779__Galactosylceramide_and_Sulfatide_metabolism__bGS__Beta-galactosidase_(EC_3.2.1.23)	Sulfur Metabolism	-	Galactosylceramide and Sulfatide metabolism
HD37_revised_scaffold23000_1_gene63456	fig|1120974.3.peg.2668__494__CBSS-393121.3.peg.2760__R1__hypothetical_protein_BH3604	Clustering-based subsystems	Protein export?	CBSS-393121.3.peg.2760
HD37_revised_scaffold49239_1_gene46665	fig|1120974.3.peg.2697__829__Alanine_biosynthesis__SufS__Cysteine_desulfurase_(EC_2.8.1.7),_SufS_subfamily	Amino Acids and Derivatives	Alanine, serine, and glycine	Alanine biosynthesis
HD37_revised_scaffold49239_1_gene46664	fig|1120974.3.peg.2698__350__pyrimidine_conversions__thydyk__Thymidylate_kinase_(EC_2.7.4.9)	Nucleosides and Nucleotides	Pyrimidines	pyrimidine conversions
HD37_revised_scaffold19099_2_gene79458	fig|1120974.3.peg.2830__109__Staphylococcal_pathogenicity_islands_SaPI__att_PI4__SSU_ribosomal_protein_S18p_@_SSU_ribosomal_protein_S18p,_zinc-independent	Phages, Prophages, Transposable elements, Plasmids	Pathogenicity islands	Staphylococcal pathogenicity islands SaPI
HD37_revised_scaffold19099_2_gene79456	fig|1120974.3.peg.2832__1222__Purine_conversions__AK__Adenylate_kinase_(EC_2.7.4.3)	Nucleosides and Nucleotides	Purines	Purine conversions
HD18_revised_scaffold40332_1_gene33205	fig|1120974.3.peg.285__918__Lipoprotein_sorting_system__LolD__Lipoprotein_releasing_system_ATP-binding_protein_LolD	Cell Wall and Capsule	Gram-Negative cell wall components	Lipoprotein sorting system
HD37_revised_scaffold2929_2_gene67609	fig|1120974.3.peg.285__918__Lipoprotein_sorting_system__LolD__Lipoprotein_releasing_system_ATP-binding_protein_LolD	Cell Wall and Capsule	Gram-Negative cell wall components	Lipoprotein sorting system
HD37_revised_scaffold51526_2_gene87260	fig|1120974.3.peg.2996__1165__Plasmid_replication__ParA__Chromosome_(plasmid)_partitioning_protein_ParA	DNA Metabolism	DNA replication	Plasmid replication
HD37_revised_scaffold278_1_gene83764	fig|1120974.3.peg.3022__854__Indole-pyruvate_oxidoreductase_complex__IorB__Indolepyruvate_oxidoreductase_subunit_IorB_(EC_1.2.7.8)	Amino Acids and Derivatives	Aromatic amino acids and derivatives	Indole-pyruvate oxidoreductase complex
HD37_revised_scaffold278_1_gene83763	fig|1120974.3.peg.3023__854__Indole-pyruvate_oxidoreductase_complex__IorA__Indolepyruvate_oxidoreductase_subunit_IorA_(EC_1.2.7.8)	Amino Acids and Derivatives	Aromatic amino acids and derivatives	Indole-pyruvate oxidoreductase complex
HD37_revised_scaffold278_1_gene83758	fig|1120974.3.peg.3026__806__Glycine_reductase,_sarcosine_reductase_and_betaine_reductase__TrxA__Thioredoxin	Protein Metabolism	Selenoproteins	Glycine reductase, sarcosine reductase and betaine reductase
HD37_revised_scaffold49324_1_gene94595	fig|1120974.3.peg.3029__46__RuvABC_plus_a_hypothetical__RuvC__Crossover_junction_endodeoxyribonuclease_RuvC_(EC_3.1.22.4)	DNA Metabolism	DNA recombination	RuvABC plus a hypothetical
HD37_revised_scaffold49324_1_gene94599	fig|1120974.3.peg.3033__587__Coenzyme_A_Biosynthesis__PPAT__Phosphopantetheine_adenylyltransferase_(EC_2.7.7.3)	Cofactors, Vitamins, Prosthetic Groups, Pigments	Coenzyme A	Coenzyme A Biosynthesis
HD37_revised_scaffold49324_1_gene94604	fig|1120974.3.peg.3038__255__UDP-N-acetylmuramate_from_Fructose-6-phosphate_Biosynthesis__UAPGAR__UDP-N-acetylenolpyruvoylglucosamine_reductase_(EC_1.1.1.158)	Cell Wall and Capsule	-	UDP-N-acetylmuramate from Fructose-6-phosphate Biosynthesis
HD5_revised_scaffold47575_1_gene203	fig|1120974.3.peg.3038__255__UDP-N-acetylmuramate_from_Fructose-6-phosphate_Biosynthesis__UAPGAR__UDP-N-acetylenolpyruvoylglucosamine_reductase_(EC_1.1.1.158)	Cell Wall and Capsule	-	UDP-N-acetylmuramate from Fructose-6-phosphate Biosynthesis
HD37_revised_scaffold49324_1_gene94607	fig|1120974.3.peg.3041__279__V-Type_ATP_synthase__E__V-type_ATP_synthase_subunit_E_(EC_3.6.3.14)	Respiration	ATP synthases	V-Type ATP synthase
HD37_revised_scaffold35824_1_gene47911	fig|1120974.3.peg.3047__279__V-Type_ATP_synthase__K__V-type_ATP_synthase_subunit_K_(EC_3.6.3.14)	Respiration	ATP synthases	V-Type ATP synthase
LD25_revised_scaffold9333_1_gene90920	fig|1120974.3.peg.3054__941__Maltose_and_Maltodextrin_Utilization__SusB__Alpha-glucosidase_(EC_3.2.1.20)	Carbohydrates	Di- and oligosaccharides	Maltose and Maltodextrin Utilization
HD35_revised_scaffold61222_2_gene145380	fig|1120974.3.peg.3070__275__Uracil-DNA_glycosylase__UDG-1__Uracil-DNA_glycosylase,_family_1	DNA Metabolism	DNA repair	Uracil-DNA glycosylase
LD84_revised_scaffold4697_1_gene134866	fig|1120974.3.peg.3130__995__Murein_Hydrolases__AmiA__N-acetylmuramoyl-L-alanine_amidase_(EC_3.5.1.28)	Cell Wall and Capsule	-	Murein Hydrolases
HD35_revised_scaffold4672_2_gene44544	fig|1120974.3.peg.3132__660__DNA_repair,_bacterial_MutL-MutS_system__MutS2__Recombination_inhibitory_protein_MutS2	DNA Metabolism	DNA repair	DNA repair, bacterial MutL-MutS system
HD38_revised_scaffold35151_3_gene36768	fig|1120974.3.peg.3207__811__Glycolysis_and_Gluconeogenesis,_including_Archaeal_enzymes__PpD__Pyruvate,phosphate_dikinase_(EC_2.7.9.1)	Carbohydrates	Central carbohydrate metabolism	Glycolysis and Gluconeogenesis, including Archaeal enzymes
LD54_revised_C745411_1_gene11170	fig|1120974.3.peg.341__199__Ton_and_Tol_transport_systems__TonBR__TonB-dependent_receptor	Membrane Transport	-	Ton and Tol transport systems
HD37_revised_scaffold50168_1_gene22202	fig|1120974.3.peg.341__199__Ton_and_Tol_transport_systems__TonBR__TonB-dependent_receptor	Membrane Transport	-	Ton and Tol transport systems
HD35_revised_scaffold93678_1_gene160423	fig|1120974.3.peg.379__457__CBSS-258594.1.peg.3339__R8__Glycosyl_transferase,_group_1	Clustering-based subsystems	Biosynthesis of galactoglycans and related lipopolysacharides	CBSS-258594.1.peg.3339
LD84_revised_scaffold26731_1_gene116003	fig|1120974.3.peg.440__652__DNA_Repair_Base_Excision__lig2__DNA_ligase_(EC_6.5.1.2)	DNA Metabolism	DNA repair	DNA Repair Base Excision
HD16_revised_scaffold34198_2_gene108317	fig|1120974.3.peg.440__652__DNA_Repair_Base_Excision__lig2__DNA_ligase_(EC_6.5.1.2)	DNA Metabolism	DNA repair	DNA Repair Base Excision
HD38_revised_scaffold38002_7_gene51910	fig|1120974.3.peg.454__273__Unspecified_monosaccharide_transport_cluster__FtsK__Cell_division_protein_FtsK	Carbohydrates	Monosaccharides	Unspecified monosaccharide transport cluster
LD3_revised_C612355_1_gene26410	fig|1120974.3.peg.459__1__Resistance_to_fluoroquinolones__parC__Topoisomerase_IV_subunit_A_(EC_5.99.1.-)	Virulence	Resistance to antibiotics and toxic compounds	Resistance to fluoroquinolones
LD22_revised_scaffold84976_1_gene86720	fig|1120974.3.peg.47__605__Conjugative_transposon,_Bacteroidales__TraG-CTn__Conjugative_transposon_protein_TraG	Phages, Prophages, Transposable elements, Plasmids	Transposable elements	Conjugative transposon, Bacteroidales
HD62_revised_C874463_1_gene101266	fig|1120974.3.peg.47__605__Conjugative_transposon,_Bacteroidales__TraG-CTn__Conjugative_transposon_protein_TraG	Phages, Prophages, Transposable elements, Plasmids	Transposable elements	Conjugative transposon, Bacteroidales
HD40_revised_scaffold91169_1_gene77389	fig|1120974.3.peg.47__605__Conjugative_transposon,_Bacteroidales__TraG-CTn__Conjugative_transposon_protein_TraG	Phages, Prophages, Transposable elements, Plasmids	Transposable elements	Conjugative transposon, Bacteroidales
HD16_revised_scaffold1026_3_gene43865	fig|1120974.3.peg.59__771__Fructose_utilization__Tal__Transaldolase_(EC_2.2.1.2)	Carbohydrates	Monosaccharides	Fructose utilization
HD35_revised_scaffold19371_3_gene67404	fig|1120974.3.peg.59__771__Fructose_utilization__Tal__Transaldolase_(EC_2.2.1.2)	Carbohydrates	Monosaccharides	Fructose utilization
HD38_revised_scaffold40797_2_gene15446	fig|1120974.3.peg.6__605__Conjugative_transposon,_Bacteroidales__TraE-CTn__Conjugative_transposon_protein_TraE	Phages, Prophages, Transposable elements, Plasmids	Transposable elements	Conjugative transposon, Bacteroidales
HD18_revised_scaffold59033_1_gene29672	fig|1120974.3.peg.633__304__YcfH__YjjV__Putative_deoxyribonuclease_YjjV	DNA Metabolism	-	YcfH
HD37_revised_scaffold37008_1_gene72656	fig|1120974.3.peg.682__833__Hemin_transport_system__TonB__Ferric_siderophore_transport_system,_periplasmic_binding_protein_TonB	Iron acquisition and metabolism	-	Hemin transport system
LD30_revised_scaffold11832_1_gene119106	fig|1120974.3.peg.683__833__Hemin_transport_system__TonB__Ferric_siderophore_transport_system,_periplasmic_binding_protein_TonB	Iron acquisition and metabolism	-	Hemin transport system
HD37_revised_scaffold37008_1_gene72654	fig|1120974.3.peg.684__836__Hfl_operon__HflX__GTP-binding_protein_HflX	Stress Response	-	Hfl operon
LD38_revised_scaffold43758_1_gene83089	fig|1120974.3.peg.690__550__Cell_Division_Subsystem_including_YidCD__YidD__Protein_YidD	Clustering-based subsystems	Cell Division	Cell Division Subsystem including YidCD
LD89_revised_C419334_1_gene3566	fig|1120974.3.peg.752__605__Conjugative_transposon,_Bacteroidales__TraM-CTn__Conjugative_transposon_protein_TraM	Phages, Prophages, Transposable elements, Plasmids	Transposable elements	Conjugative transposon, Bacteroidales
HD35_revised_scaffold29841_1_gene150142	fig|1120974.3.peg.796__769__Fructooligosaccharides(FOS)_and_Raffinose_Utilization__BG__Beta-glucosidase_(EC_3.2.1.21)	Carbohydrates	Di- and oligosaccharides	Fructooligosaccharides(FOS) and Raffinose Utilization
HD8_revised_scaffold56682_3_gene38155	fig|1120974.3.peg.819__403__Beta-lactamase__BLI__Metal-dependent_hydrolases_of_the_beta-lactamase_superfamily_I;_PhnP_protein	Virulence	Resistance to antibiotics and toxic compounds	Beta-lactamase
HD37_revised_scaffold24301_1_gene45789	fig|1120974.3.peg.852__1222__Purine_conversions__NPP__Alkaline_phosphodiesterase_I_(EC_3.1.4.1)_/_Nucleotide_pyrophosphatase_(EC_3.6.1.9)	Nucleosides and Nucleotides	Purines	Purine conversions
LD4_revised_scaffold41246_1_gene36429	fig|1120974.3.peg.908__945__Mannose_Metabolism__MnnA_16__Alpha-1,2-mannosidase	Carbohydrates	Monosaccharides	Mannose Metabolism
HD51_revised_scaffold43390_1_gene66551	fig|1120978.3.peg.375__1281__Recycling_of_Peptidoglycan_Amino_Acids__AmiD__N-acetylmuramoyl-L-alanine_amidase_(EC_3.5.1.28)	Cell Wall and Capsule	-	Recycling of Peptidoglycan Amino Acids
LD95_revised_scaffold28606_2_gene82468	fig|1120992.3.peg.1995__549__Cell_Division_Cluster__FIG001960__FIG001960:_FtsZ-interacting_protein_related_to_cell_division	Clustering-based subsystems	Cell Division	Cell Division Cluster
LD33_revised_scaffold48707_1_gene44327	fig|1121022.3.peg.2902__635__D-Galacturonate_and_D-Glucuronate_Utilization__PE__Pectinesterase_(EC_3.1.1.11)	Carbohydrates	Monosaccharides	D-Galacturonate and D-Glucuronate Utilization
LD92_revised_scaffold31700_4_gene30721	fig|1121090.3.peg.1447__210__Transcription_initiation,_bacterial_sigma_factors__RpoE__RNA_polymerase_sigma_factor_RpoE	RNA Metabolism	Transcription	Transcription initiation, bacterial sigma factors
HD12_revised_scaffold6399_3_gene20338	fig|1121090.3.peg.2611__11__Respiratory_dehydrogenases_1__DACDL__D-amino_acid_dehydrogenase_large_subunit_(EC_1.4.99.1)	Respiration	Electron donating reactions	Respiratory dehydrogenases 1
HD37_revised_scaffold187_2_gene77768	fig|1121090.3.peg.2631__1131__Phage_shock_protein_(psp)_operon__PspA__Phage_shock_protein_A	Stress Response	-	Phage shock protein (psp) operon
HD12_revised_scaffold4068_5_gene51235	fig|1121090.3.peg.3995__1190__Proline_Synthesis__proB__Glutamate_5-kinase_(EC_2.7.2.11)	Amino Acids and Derivatives	Proline and 4-hydroxyproline	Proline Synthesis
HD37_revised_C896828_1_gene62395	fig|1121094.3.peg.2370__806__Glycine_reductase,_sarcosine_reductase_and_betaine_reductase__TrxA__Thioredoxin	Protein Metabolism	Selenoproteins	Glycine reductase, sarcosine reductase and betaine reductase
HD38_revised_scaffold7847_1_gene41665	fig|1121096.3.peg.1594__635__D-Galacturonate_and_D-Glucuronate_Utilization__RhiN__Rhamnogalacturonides_degradation_protein_RhiN	Carbohydrates	Monosaccharides	D-Galacturonate and D-Glucuronate Utilization
HD37_revised_scaffold45856_1_gene22026	fig|1121096.3.peg.4066__827__Heat_shock_dnaK_gene_cluster_extended__RdgB__Nucleoside_5-triphosphatase_RdgB_(dHAPTP,_dITP,_XTP-specific)_(EC_3.6.1.15)	Stress Response	Heat shock	Heat shock dnaK gene cluster extended
HD38_revised_scaffold5076_3_gene23887	fig|1121096.3.peg.877__199__Ton_and_Tol_transport_systems__TonBR__TonB-dependent_receptor	Membrane Transport	-	Ton and Tol transport systems
HD37_revised_scaffold49239_1_gene46661	fig|1121098.3.peg.1568__989__Multidrug_Resistance_Efflux_Pumps__AcrB__Acriflavin_resistance_protein	Virulence	Resistance to antibiotics and toxic compounds	Multidrug Resistance Efflux Pumps
HD37_revised_scaffold50168_1_gene22204	fig|1121098.3.peg.2064__210__Transcription_initiation,_bacterial_sigma_factors__sig70__RNA_polymerase_sigma-70_factor	RNA Metabolism	Transcription	Transcription initiation, bacterial sigma factors
HD37_revised_scaffold34814_3_gene48798	fig|1121099.3.peg.2051__556__Cellulosome__SusD__SusD,_outer_membrane_protein	Carbohydrates	Polysaccharides	Cellulosome
HD37_revised_scaffold51677_2_gene4583	fig|1121099.3.peg.2051__556__Cellulosome__SusD__SusD,_outer_membrane_protein	Carbohydrates	Polysaccharides	Cellulosome
HD35_revised_scaffold27990_2_gene139516	fig|1121099.3.peg.2051__556__Cellulosome__SusD__SusD,_outer_membrane_protein	Carbohydrates	Polysaccharides	Cellulosome
LD22_revised_scaffold85770_3_gene138200	fig|1121099.3.peg.2051__556__Cellulosome__SusD__SusD,_outer_membrane_protein	Carbohydrates	Polysaccharides	Cellulosome
HD37_revised_C928697_1_gene92637	fig|1121101.3.peg.1204__199__Ton_and_Tol_transport_systems__TonBR__TonB-dependent_receptor	Membrane Transport	-	Ton and Tol transport systems
LD33_revised_scaffold8140_1_gene38570	fig|1121101.3.peg.1409__635__D-Galacturonate_and_D-Glucuronate_Utilization__RhiN__Rhamnogalacturonides_degradation_protein_RhiN	Carbohydrates	Monosaccharides	D-Galacturonate and D-Glucuronate Utilization
HD37_revised_scaffold50884_1_gene56379	fig|1121101.3.peg.2529__556__Cellulosome__SusD__SusD,_outer_membrane_protein	Carbohydrates	Polysaccharides	Cellulosome
HD47_revised_scaffold10298_1_gene96511	fig|1121101.3.peg.4289__833__Hemin_transport_system__TonB__Ferric_siderophore_transport_system,_periplasmic_binding_protein_TonB	Iron acquisition and metabolism	-	Hemin transport system
HD47_revised_C622197_1_gene58775	fig|1121101.3.peg.561__238__Two-component_regulatory_systems_in_Campylobacter__HK__Two-component_system_histidine_kinase	Regulation and Cell signaling	-	Two-component regulatory systems in Campylobacter
HD5_revised_scaffold56787_2_gene57056	fig|1121114.4.peg.1667__989__Multidrug_Resistance_Efflux_Pumps__AcrB__RND_multidrug_efflux_transporter;_Acriflavin_resistance_protein	Virulence	Resistance to antibiotics and toxic compounds	Multidrug Resistance Efflux Pumps
HD12_revised_scaffold25361_1_gene27106	fig|1121114.4.peg.1881__611__Copper_homeostasis__CIA__Lead,_cadmium,_zinc_and_mercury_transporting_ATPase_(EC_3.6.3.3)_(EC_3.6.3.5);_Copper-translocating_P-type_ATPase_(EC_3.6.3.4)	Virulence	Resistance to antibiotics and toxic compounds	Copper homeostasis
LD41_revised_scaffold54461_1_gene31033	fig|1121114.4.peg.2758__726__Exopolysaccharide_Biosynthesis__Glt2__Glycosyl_transferase,_group_2_family_protein	Cell Wall and Capsule	Capsular and extracellular polysacchrides	Exopolysaccharide Biosynthesis
HD1_revised_scaffold42047_1_gene51060	fig|1121114.4.peg.4266__301__Xylose_utilization__aX_ABCb__Possible_alpha-xyloside_ABC_transporter,_permease_component	Carbohydrates	Monosaccharides	Xylose utilization
HD1_revised_scaffold42047_1_gene50985	fig|1121114.4.peg.4775__769__Fructooligosaccharides(FOS)_and_Raffinose_Utilization__Aga__Alpha-galactosidase_(EC_3.2.1.22)	Carbohydrates	Di- and oligosaccharides	Fructooligosaccharides(FOS) and Raffinose Utilization
HD82_revised_scaffold5252_1_gene22596	fig|1121114.4.peg.5085__639__D-galactarate,_D-glucarate_and_D-glycerate_catabolism__SdaR__Sugar_diacid_utilization_regulator_SdaR	Carbohydrates	Monosaccharides	D-galactarate, D-glucarate and D-glycerate catabolism
LD62_revised_scaffold7578_1_gene20841	fig|1121114.4.peg.5126__586__Cobalt-zinc-cadmium_resistance__czcD__Cobalt-zinc-cadmium_resistance_protein_CzcD	Virulence	Resistance to antibiotics and toxic compounds	Cobalt-zinc-cadmium resistance
HD12_revised_scaffold44048_1_gene80553	fig|1121114.4.peg.5185__941__Maltose_and_Maltodextrin_Utilization__AglB__Neopullulanase_(EC_3.2.1.135)	Carbohydrates	Di- and oligosaccharides	Maltose and Maltodextrin Utilization
HD38_revised_scaffold14360_1_gene1637	fig|1121114.4.peg.605__238__Two-component_regulatory_systems_in_Campylobacter__RR__Two-component_system_response_regulator	Regulation and Cell signaling	-	Two-component regulatory systems in Campylobacter
HD1_revised_scaffold42047_1_gene50969	fig|1121114.4.peg.824__749__Fermentations:_Mixed_acid__FSP__Sugar/maltose_fermentation_stimulation_protein_homolog	Carbohydrates	Fermentation	Fermentations: Mixed acid
HD37_revised_scaffold46676_1_gene25435	fig|1121129.3.peg.1467__131__Sucrose_utilization__FruK__Fructokinase_(EC_2.7.1.4)	Carbohydrates	Di- and oligosaccharides	Sucrose utilization
HD16_revised_scaffold764_2_gene18735	fig|1121129.3.peg.590__717__Acetyl-CoA_fermentation_to_Butyrate__Buk__Butyrate_kinase_(EC_2.7.2.7)	Carbohydrates	Fermentation	Acetyl-CoA fermentation to Butyrate
HD35_revised_C1478050_1_gene152917	fig|1121129.3.peg.642__989__Multidrug_Resistance_Efflux_Pumps__RND__Membrane_fusion_protein_of_RND_family_multidrug_efflux_pump	Virulence	Resistance to antibiotics and toxic compounds	Multidrug Resistance Efflux Pumps
HD37_revised_scaffold39683_2_gene90098	fig|1121280.3.peg.1307__837__High_affinity_phosphate_transporter_and_control_of_PHO_regulon__PhoB__Phosphate_regulon_transcriptional_regulatory_protein_PhoB_(SphR)	Phosphorus Metabolism	-	High affinity phosphate transporter and control of PHO regulon
HD35_revised_scaffold5768_1_gene5870	fig|1121308.3.peg.3483__1221__Purine_Utilization__GDA__Guanine_deaminase_(EC_3.5.4.3);_Hydroxydechloroatrazine_ethylaminohydrolase_(EC_3.5.99.3)	Nucleosides and Nucleotides	Purines	Purine Utilization
LD60_revised_scaffold46695_1_gene7530	fig|1121315.3.peg.3118__104__Sporulation_Cluster_III_A__AA__Stage_III_sporulation_protein_AA	Dormancy and Sporulation	-	Sporulation Cluster III A
HD65_revised_scaffold29108_1_gene24322	fig|1121334.3.peg.104__550__Cell_Division_Subsystem_including_YidCD__DNAA__Chromosomal_replication_initiator_protein_DnaA	Clustering-based subsystems	Cell Division	Cell Division Subsystem including YidCD
HD1_revised_scaffold42030_1_gene52064	fig|1121334.3.peg.1098__941__Maltose_and_Maltodextrin_Utilization__MsmK__Multiple_sugar_ABC_transporter,_ATP-binding_protein	Carbohydrates	Di- and oligosaccharides	Maltose and Maltodextrin Utilization
HD16_revised_scaffold10600_1_gene80147	fig|1121334.3.peg.1098__941__Maltose_and_Maltodextrin_Utilization__MsmK__Multiple_sugar_ABC_transporter,_ATP-binding_protein	Carbohydrates	Di- and oligosaccharides	Maltose and Maltodextrin Utilization
HD16_revised_scaffold11112_2_gene113779	fig|1121334.3.peg.1411__279__V-Type_ATP_synthase__D__V-type_ATP_synthase_subunit_D_(EC_3.6.3.14)	Respiration	ATP synthases	V-Type ATP synthase
HD16_revised_scaffold11112_2_gene113778	fig|1121334.3.peg.1412__279__V-Type_ATP_synthase__B__V-type_ATP_synthase_subunit_B_(EC_3.6.3.14)	Respiration	ATP synthases	V-Type ATP synthase
HD16_revised_scaffold11112_2_gene113777	fig|1121334.3.peg.1413__279__V-Type_ATP_synthase__A__V-type_ATP_synthase_subunit_A_(EC_3.6.3.14)	Respiration	ATP synthases	V-Type ATP synthase
HD1_revised_scaffold42030_1_gene52046	fig|1121334.3.peg.1415__279__V-Type_ATP_synthase__F__V-type_ATP_synthase_subunit_F_(EC_3.6.3.14)	Respiration	ATP synthases	V-Type ATP synthase
HD16_revised_scaffold11112_2_gene113775	fig|1121334.3.peg.1415__279__V-Type_ATP_synthase__F__V-type_ATP_synthase_subunit_F_(EC_3.6.3.14)	Respiration	ATP synthases	V-Type ATP synthase
HD16_revised_scaffold11112_2_gene113773	fig|1121334.3.peg.1417__279__V-Type_ATP_synthase__I__V-type_ATP_synthase_subunit_I_(EC_3.6.3.14)	Respiration	ATP synthases	V-Type ATP synthase
HD65_revised_scaffold25072_1_gene80034	fig|1121334.3.peg.1418__279__V-Type_ATP_synthase__C__V-type_ATP_synthase_subunit_C_(EC_3.6.3.14)	Respiration	ATP synthases	V-Type ATP synthase
HD5_revised_scaffold52964_7_gene13660	fig|1121334.3.peg.1772__1207__Protein_degradation__DbAMP__Deblocking_aminopeptidase_(EC_3.4.11.-)	Protein Metabolism	Protein degradation	Protein degradation
HD5_revised_scaffold19_2_gene7593	fig|1121334.3.peg.185__941__Maltose_and_Maltodextrin_Utilization__AglB__Neopullulanase_(EC_3.2.1.135)	Carbohydrates	Di- and oligosaccharides	Maltose and Maltodextrin Utilization
LD85_revised_scaffold13279_1_gene47265	fig|1121334.3.peg.1976__838__Histidine_Biosynthesis__HisH__Histidinol-phosphatase_(EC_3.1.3.15)	Amino Acids and Derivatives	Histidine Metabolism	Histidine Biosynthesis
HD16_revised_scaffold55316_1_gene5155	fig|1121334.3.peg.223__968__Methicillin_resistance_in_Staphylococci__MurE__UDP-N-acetylmuramoylalanyl-D-glutamate--2,6-diaminopimelate_ligase_(EC_6.3.2.13)	Virulence	Resistance to antibiotics and toxic compounds	Methicillin resistance in Staphylococci
HD1_revised_scaffold42047_1_gene51062	fig|1121334.3.peg.2451__66__Sialic_Acid_Metabolism__ABCs__ABC_transporter,_predicted_N-acetylneuraminate-binding_protein	Cell Wall and Capsule	Capsular and extracellular polysacchrides	Sialic Acid Metabolism
LD85_revised_scaffold11932_1_gene116444	fig|1121334.3.peg.2453__402__Beta-Glucoside_Metabolism__CepA__Cellobiose_phosphorylase_(EC_2.4.1.-)	Carbohydrates	Di- and oligosaccharides	Beta-Glucoside Metabolism
HD16_revised_scaffold10600_1_gene80148	fig|1121334.3.peg.2562__639__D-galactarate,_D-glucarate_and_D-glycerate_catabolism__SdaR__Sugar_diacid_utilization_regulator_SdaR	Carbohydrates	Monosaccharides	D-galactarate, D-glucarate and D-glycerate catabolism
HD18_revised_scaffold48274_1_gene30055	fig|1121334.3.peg.2599__1078__Omega-amidase_KE2__ArgJ__Glutamate_N-acetyltransferase_(EC_2.3.1.35)_/_N-acetylglutamate_synthase_(EC_2.3.1.1)	Miscellaneous	Plant-Prokaryote comparative genomics	Omega-amidase KE2
HD16_revised_scaffold55316_1_gene5158	fig|1121334.3.peg.3416__1288__Resistance_to_Vancomycin__vanW__Vancomycin_B-type_resistance_protein_VanW	Virulence	Resistance to antibiotics and toxic compounds	Resistance to Vancomycin
HD16_revised_scaffold74_2_gene8247	fig|1121334.3.peg.486__84__Small_acid-soluble_spore_proteins__Gpr__Endopeptidase_spore_protease_Gpr_(EC_3.4.24.78)	Dormancy and Sporulation	Spore DNA protection	Small acid-soluble spore proteins
HD65_revised_scaffold25016_2_gene14511	fig|1121334.3.peg.519__210__Transcription_initiation,_bacterial_sigma_factors__SigK__RNA_polymerase_sporulation_specific_sigma_factor_SigK	RNA Metabolism	Transcription	Transcription initiation, bacterial sigma factors
HD80_revised_scaffold22731_1_gene44314	fig|1121334.3.peg.705__1222__Purine_conversions__ASL__Adenylosuccinate_lyase_(EC_4.3.2.2)	Nucleosides and Nucleotides	Purines	Purine conversions
HD8_revised_scaffold88791_1_gene168755	fig|1121334.3.peg.777__811__Glycolysis_and_Gluconeogenesis,_including_Archaeal_enzymes__BiPgM__2,3-bisphosphoglycerate-independent_phosphoglycerate_mutase_(EC_5.4.2.1)	Carbohydrates	Central carbohydrate metabolism	Glycolysis and Gluconeogenesis, including Archaeal enzymes
HD5_revised_scaffold18196_3_gene73348	fig|1121342.4.peg.197__304__YcfH__YcfH__Putative_deoxyribonuclease_YcfH	DNA Metabolism	-	YcfH
HD37_revised_scaffold49324_1_gene94596	fig|1121373.3.peg.1080__412__Biogenesis_of_c-type_cytochromes__Hyp3(resA)__Thiol:disulfide_oxidoreductase_related_to_ResA	Respiration	-	Biogenesis of c-type cytochromes
LD33_revised_scaffold47999_2_gene7029	fig|1121385.3.peg.2916__910__Lipid-linked_oligosaccharide_synthesis_related_cluster__AepA__Exoenzymes_regulatory_protein_AepA_in_lipid-linked_oligosaccharide_synthesis_cluster	Cell Wall and Capsule	Capsular and extracellular polysacchrides	Lipid-linked oligosaccharide synthesis related cluster
HD16_revised_scaffold10600_1_gene80133	fig|1121396.3.peg.4489__62__Serine_Biosynthesis__SerA__D-3-phosphoglycerate_dehydrogenase_(EC_1.1.1.95)	Amino Acids and Derivatives	Alanine, serine, and glycine	Serine Biosynthesis
HD18_revised_scaffold2382_1_gene49908	fig|1121451.3.peg.671__32__Ribosome_SSU_bacterial__S1p__SSU_ribosomal_protein_S1p	Protein Metabolism	Protein biosynthesis	Ribosome SSU bacterial
HD40_revised_scaffold53862_2_gene16924	fig|1121472.3.peg.2388__837__High_affinity_phosphate_transporter_and_control_of_PHO_regulon__PhoB__Phosphate_regulon_transcriptional_regulatory_protein_PhoB_(SphR)	Phosphorus Metabolism	-	High affinity phosphate transporter and control of PHO regulon
HD38_revised_scaffold25131_3_gene68778	fig|1121482.3.peg.4228__945__Mannose_Metabolism__MnnA_16__Alpha-1,2-mannosidase	Carbohydrates	Monosaccharides	Mannose Metabolism
HD47_revised_scaffold10845_6_gene12059	fig|1121482.3.peg.4999__66__Sialic_Acid_Metabolism__NanH__Sialidase_(EC_3.2.1.18)	Cell Wall and Capsule	Capsular and extracellular polysacchrides	Sialic Acid Metabolism
LD33_revised_scaffold13425_4_gene57952	fig|1121859.3.peg.3099__885__L-Arabinose_utilization__GH1_ara__Hypothetical_glycoside_hydrolase,_family_43,_similar_to_arabinosidase	Carbohydrates	Monosaccharides	L-Arabinose utilization
LD33_revised_scaffold50948_1_gene24057	fig|1121864.3.peg.1287__769__Fructooligosaccharides(FOS)_and_Raffinose_Utilization__MsmE__Multiple_sugar_ABC_transporter,_substrate-binding_protein	Carbohydrates	Di- and oligosaccharides	Fructooligosaccharides(FOS) and Raffinose Utilization
HD16_revised_scaffold55316_1_gene5152	fig|1121864.3.peg.146__941__Maltose_and_Maltodextrin_Utilization__MalG__Maltose/maltodextrin_ABC_transporter,_permease_protein_MalG	Carbohydrates	Di- and oligosaccharides	Maltose and Maltodextrin Utilization
HD37_revised_scaffold51504_1_gene35510	fig|1121875.3.peg.2282__210__Transcription_initiation,_bacterial_sigma_factors__sig70__RNA_polymerase_sigma-70_factor	RNA Metabolism	Transcription	Transcription initiation, bacterial sigma factors
HD40_revised_C1521679_1_gene4361	fig|1121895.5.peg.3969__301__Xylose_utilization__xyl3__Beta-xylosidase_(EC_3.2.1.37)	Carbohydrates	Monosaccharides	Xylose utilization
LD73_revised_scaffold65421_1_gene94731	fig|1121904.3.peg.3493__199__Ton_and_Tol_transport_systems__TonBR__TonB-dependent_receptor	Membrane Transport	-	Ton and Tol transport systems
HD37_revised_scaffold39612_1_gene24350	fig|1121904.3.peg.3696__752__Flagellum__rpoN__RNA_polymerase_sigma-54_factor_RpoN	Motility and Chemotaxis	Flagellar motility in Prokaryota	Flagellum
LD4_revised_scaffold9447_1_gene41942	fig|1121904.3.peg.5849__837__High_affinity_phosphate_transporter_and_control_of_PHO_regulon__PhoB__Phosphate_regulon_transcriptional_regulatory_protein_PhoB_(SphR)	Phosphorus Metabolism	-	High affinity phosphate transporter and control of PHO regulon
HD40_revised_scaffold35475_1_gene122024	fig|1121904.3.peg.7895__837__High_affinity_phosphate_transporter_and_control_of_PHO_regulon__PhoB__Phosphate_regulon_transcriptional_regulatory_protein_PhoB_(SphR)	Phosphorus Metabolism	-	High affinity phosphate transporter and control of PHO regulon
HV31_revised_scaffold24003_1_gene9456	fig|1121904.3.peg.8120__786__Adhesins_in_Staphylococcus__SasA__Predicted_cell-wall-anchored_protein_SasA_(LPXTG_motif)	Virulence, Disease and Defense	Adhesion	Adhesins in Staphylococcus
LD71_revised_scaffold3066_1_gene43524	fig|1121910.3.peg.1028__865__Iron_acquisition_in_Streptococcus__piaA__Iron_compound_ABC_uptake_transporter_substrate-binding_protein	Iron acquisition and metabolism	-	Iron acquisition in Streptococcus
HD16_revised_scaffold74_2_gene8242	fig|1121917.3.peg.781__156__At5g37530_(CsdL_protein_family)__AAA__Uncharacterized_ATPase_(AAA_family)_associated_with_cysteine_desulfurase	Sulfur Metabolism	Organic sulfur assimilation	At5g37530 (CsdL protein family)
HD12_revised_scaffold14789_1_gene19699	fig|1121918.3.peg.1356__304__YcfH__YcfH__Putative_deoxyribonuclease_YcfH_/_radical_SAM_domain_protein	DNA Metabolism	-	YcfH
HD47_revised_scaffold30028_2_gene33826	fig|1121930.3.peg.1150__65__Sex_pheromones_in_Enterococcus_faecalis_and_other_Firmicutes__OppA__Oligopeptide_ABC_transporter,_periplasmic_oligopeptide-binding_protein_OppA_(TC_3.A.1.5.1)	Regulation and Cell signaling	-	Sex pheromones in Enterococcus faecalis and other Firmicutes
LD21_revised_scaffold616_1_1_gene4383	fig|1122135.3.peg.2787__220__Transport_of_Nickel_and_Cobalt__NikK__Additional_periplasmic_component_NikK_of_nickel_ECF_transporter	Membrane Transport	-	Transport of Nickel and Cobalt
LD14_revised_scaffold16346_1_gene123311	fig|1122138.3.peg.4728__371__tRNA_aminoacylation,_Phe__Phe-b__Phenylalanyl-tRNA_synthetase_beta_chain_(EC_6.1.1.20)	Protein Metabolism	Protein biosynthesis	tRNA aminoacylation, Phe
LD92_revised_scaffold11451_3_gene51883	fig|1122158.3.peg.170__911__Alkanesulfonates_Utilization__ssuB__Alkanesulfonates_ABC_transporter_ATP-binding_protein_/_Sulfonate_ABC_transporter,_ATP-binding_subunit_SsuB	Sulfur Metabolism	Organic sulfur assimilation	Alkanesulfonates Utilization
HD6_revised_scaffold42639_1_gene78799	fig|1122179.3.peg.1681__199__Ton_and_Tol_transport_systems__TonBR__Regulatory_sensor-transducer,_BlaR1/MecR1_family_/_TonB-dependent_receptor	Membrane Transport	-	Ton and Tol transport systems
HD23_revised_scaffold42338_1_gene76052	fig|1122217.3.peg.1709__1102__Peptidoglycan_Biosynthesis__murB__UDP-N-acetylenolpyruvoylglucosamine_reductase_(EC_1.1.1.158)	Cell Wall and Capsule	-	Peptidoglycan Biosynthesis
LD33_revised_scaffold48707_2_gene55254	fig|1122228.3.peg.1112__769__Fructooligosaccharides(FOS)_and_Raffinose_Utilization__BG__beta-glucosidase_(EC_3.2.1.21)	Carbohydrates	Di- and oligosaccharides	Fructooligosaccharides(FOS) and Raffinose Utilization
LD33_revised_scaffold50776_5_gene59808	fig|1122228.3.peg.182__558__Chitin_and_N-acetylglucosamine_utilization__ABCb1__N-acetyl-D-glucosamine_ABC_transporter,_permease_protein_1	Carbohydrates	Aminosugars	Chitin and N-acetylglucosamine utilization
LD33_revised_scaffold50776_5_gene59809	fig|1122228.3.peg.183__769__Fructooligosaccharides(FOS)_and_Raffinose_Utilization__MsmG__Multiple_sugar_ABC_transporter,_membrane-spanning_permease_protein_MsmG	Carbohydrates	Di- and oligosaccharides	Fructooligosaccharides(FOS) and Raffinose Utilization
LD45_revised_scaffold28056_1_gene14138	fig|1122228.3.peg.184__301__Xylose_utilization__XylS__alpha-xylosidase_(EC_3.2.1.177)	Carbohydrates	Monosaccharides	Xylose utilization
LD5_revised_scaffold4496_2_gene43381	fig|1122228.3.peg.270__643__D-gluconate_and_ketogluconates_metabolism__KDGK__2-dehydro-3-deoxygluconokinase_(EC_2.7.1.45)	Carbohydrates	Monosaccharides	D-gluconate and ketogluconates metabolism
LD52_revised_scaffold45332_3_gene99526	fig|1122228.3.peg.271__1021__2-Ketogluconate_Utilization__kguE__Epimerase_KguE	Carbohydrates	Monosaccharides	2-Ketogluconate Utilization
LD33_revised_scaffold50776_7_gene37626	fig|1122228.3.peg.923__769__Fructooligosaccharides(FOS)_and_Raffinose_Utilization__BG__beta-glucosidase_(EC_3.2.1.21)	Carbohydrates	Di- and oligosaccharides	Fructooligosaccharides(FOS) and Raffinose Utilization
HD37_revised_scaffold37008_1_gene72652	fig|1122236.3.peg.1803__142__Synthesis_of_osmoregulated_periplasmic_glucans__MdoB__Phosphoglycerol_transferase_I_(EC_2.7.8.20)	Stress Response	Osmotic stress	Synthesis of osmoregulated periplasmic glucans
LD4_revised_scaffold24198_1_gene70700	fig|1122605.3.peg.1788__512__CMP-N-acetylneuraminate_Biosynthesis__NeuA__N-Acetylneuraminate_cytidylyltransferase_(EC_2.7.7.43)	Cell Wall and Capsule	Capsular and extracellular polysacchrides	CMP-N-acetylneuraminate Biosynthesis
HD37_revised_scaffold44032_1_gene73935	fig|1122605.3.peg.3017__323__cAMP_signaling_in_bacteria__ElaA__ElaA_protein	Regulation and Cell signaling	-	cAMP signaling in bacteria
LD44_revised_scaffold29903_1_gene140353	fig|1122611.3.peg.1760__19__Ribonuclease_H__RNaseHI__Ribonuclease_HI_(EC_3.1.26.4)	RNA Metabolism	RNA processing and modification	Ribonuclease H
LD33_revised_C835830_1_gene52871	fig|1122611.3.peg.2571__1110__Periplasmic-Binding-Protein-Dependent_Transport_System_for_&*945;-Glucosides__AglG__Alpha-glucoside_transport_system_permease_protein_AglG	Membrane Transport	ABC transporters	Periplasmic-Binding-Protein-Dependent Transport System for &*945;-Glucosides
LD88_revised_scaffold26175_1_gene25645	fig|1122917.3.peg.2219__363__tRNA_aminoacylation,_Glu_and_Gln__GatA__Aspartyl-tRNA(Asn)_amidotransferase_subunit_A_(EC_6.3.5.6)_@_Glutamyl-tRNA(Gln)_amidotransferase_subunit_A_(EC_6.3.5.7)	Protein Metabolism	Protein biosynthesis	tRNA aminoacylation, Glu and Gln
HD18_revised_scaffold36601_2_gene82729	fig|1122917.3.peg.4050__897__Lactose_and_Galactose_Uptake_and_Utilization__GanA__Arabinogalactan_endo-1,4-beta-galactosidase_(EC_3.2.1.89)	Carbohydrates	Di- and oligosaccharides	Lactose and Galactose Uptake and Utilization
LD85_revised_scaffold36252_2_gene86767	fig|1122917.3.peg.411__301__Xylose_utilization__bX_ABCb__Xylose_ABC_transporter,_permease_component	Carbohydrates	Monosaccharides	Xylose utilization
HD37_revised_scaffold187_2_gene77803	fig|1122917.3.peg.5366__301__Xylose_utilization__bX_ABCb__Xylose_ABC_transporter,_permease_component	Carbohydrates	Monosaccharides	Xylose utilization
LD5_revised_scaffold22484_1_gene33004	fig|1122918.3.peg.139__558__Chitin_and_N-acetylglucosamine_utilization__ABCb1__N-Acetyl-D-glucosamine_ABC_transport_system,_permease_protein_1	Carbohydrates	Aminosugars	Chitin and N-acetylglucosamine utilization
HD8_revised_scaffold39564_1_gene170053	fig|1122918.3.peg.246__90__Sortase__SrtA__Sortase_A,_LPXTG_specific	Cell Wall and Capsule	Gram-Positive cell wall components	Sortase
LD45_revised_scaffold15681_1_gene40091	fig|1122919.3.peg.1992__494__CBSS-393121.3.peg.2760__R5__NLP/P60_family_protein	Clustering-based subsystems	Protein export?	CBSS-393121.3.peg.2760
HD37_revised_C910243_1_gene31698	fig|1122919.3.peg.2673__857__Inositol_catabolism__IolG__Myo-inositol_2-dehydrogenase_(EC_1.1.1.18)	Carbohydrates	Sugar alcohols	Inositol catabolism
LD33_revised_scaffold50948_1_gene24061	fig|1122921.3.peg.3202__941__Maltose_and_Maltodextrin_Utilization__MalZ__Maltodextrin_glucosidase_(EC_3.2.1.20)	Carbohydrates	Di- and oligosaccharides	Maltose and Maltodextrin Utilization
HD38_revised_scaffold27556_1_gene8469	fig|1122921.3.peg.4344__90__Sortase__SrtB1__NPQTN_specific_sortase_B	Cell Wall and Capsule	Gram-Positive cell wall components	Sortase
HD65_revised_scaffold25662_1_gene5092	fig|1122927.3.peg.2772__98__Spore_germination__GerN__Spore_germination_protein_GerN_(inosine-dependent_germination),_Na+/H+_antiporter	Dormancy and Sporulation	-	Spore germination
LD33_revised_scaffold51218_2_gene37630	fig|1122927.3.peg.3435__301__Xylose_utilization__XynT__Xyloside_transporter_XynT	Carbohydrates	Monosaccharides	Xylose utilization
HD37_revised_scaffold44630_1_gene9445	fig|1122927.3.peg.4164__857__Inositol_catabolism__IolE__Inosose_dehydratase_(EC_4.2.1.44)	Carbohydrates	Sugar alcohols	Inositol catabolism
LD92_revised_scaffold8204_1_gene36768	fig|1122936.3.peg.1225__273__Unspecified_monosaccharide_transport_cluster__FtsK__Cell_division_protein_FtsK	Carbohydrates	Monosaccharides	Unspecified monosaccharide transport cluster
LD47_revised_scaffold42158_1_gene67936	fig|1122936.3.peg.1428__59__Selenocysteine_metabolism__SelD__Selenide,water_dikinase_(EC_2.7.9.3)_@_selenocysteine-containing	Protein Metabolism	Selenoproteins	Selenocysteine metabolism
LD20_revised_C2712308_1_gene25976	fig|1122936.3.peg.1471__325__cell_division_cluster_containing_FtsQ__FtsQ__Cell_division_protein_FtsQ	Clustering-based subsystems	Cell Division	cell division cluster containing FtsQ
LD3_revised_scaffold26213_1_gene46605	fig|1122936.3.peg.1684__1108__Periplasmic_Stress_Response__RseA__Sigma_factor_RpoE_negative_regulatory_protein_RseA	Stress Response	Periplasmic Stress	Periplasmic Stress Response
LD43_revised_scaffold7152_1_gene47912	fig|1122936.3.peg.175__1102__Peptidoglycan_Biosynthesis__CP_20_20__D-alanyl-D-alanine_carboxypeptidase_(EC_3.4.16.4)	Cell Wall and Capsule	-	Peptidoglycan Biosynthesis
LD21_revised_scaffold4125_5_gene23045	fig|1122936.3.peg.1787__914__Lipopolysaccharide_assembly__SurA__Survival_protein_SurA_precursor_(Peptidyl-prolyl_cis-trans_isomerase_SurA)_(EC_5.2.1.8)	Cell Wall and Capsule	Gram-Negative cell wall components	Lipopolysaccharide assembly
LD60_revised_scaffold39315_2_gene66739	fig|1122936.3.peg.441__914__Lipopolysaccharide_assembly__LolE__Lipoprotein_releasing_system_transmembrane_protein_LolE	Cell Wall and Capsule	Gram-Negative cell wall components	Lipopolysaccharide assembly
LD21_revised_scaffold14356_3_gene56911	fig|1122936.3.peg.517__1086__Oxidative_stress__IBP__Non-specific_DNA-binding_protein_Dps_/_Iron-binding_ferritin-like_antioxidant_protein_/_Ferroxidase_(EC_1.16.3.1)	Stress Response	Oxidative stress	Oxidative stress
LD75_revised_scaffold34370_1_gene164219	fig|1122936.3.peg.537__1224__Purine_nucleotide_synthesis_regulator__PurR__Purine_nucleotide_synthesis_repressor	Nucleosides and Nucleotides	Purines	Purine nucleotide synthesis regulator
LD77_revised_scaffold16021_1_2_gene44797	fig|1122936.3.peg.719__914__Lipopolysaccharide_assembly__SmpA__Outer_membrane_lipoprotein_SmpA,_a_component_of_the_essential_YaeT_outer-membrane_protein_assembly_complex	Cell Wall and Capsule	Gram-Negative cell wall components	Lipopolysaccharide assembly
LD51_revised_scaffold26339_1_gene129655	fig|1122936.3.peg.879__1108__Periplasmic_Stress_Response__Skp__Outer_membrane_chaperone_Skp_(OmpH)_precursor_@_Outer_membrane_protein_H_precursor	Stress Response	Periplasmic Stress	Periplasmic Stress Response
LD45_revised_C571625_1_gene29305	fig|1122936.3.peg.967__794__Glutathione:_Biosynthesis_and_gamma-glutamyl_cycle__gshF__Glutathione_biosynthesis_bifunctional_protein_gshF_(EC_6.3.2.2)(EC_6.3.2.3)	Stress Response	Oxidative stress	Glutathione: Biosynthesis and gamma-glutamyl cycle
HD37_revised_scaffold42799_1_gene84807	fig|1122985.3.peg.956__556__Cellulosome__SusD__SusD,_outer_membrane_protein	Carbohydrates	Polysaccharides	Cellulosome
HD16_revised_C714351_1_gene88107	fig|1122988.3.peg.1172__1183__Potassium_homeostasis__kefA__Potassium_efflux_system_KefA_protein_/_Small-conductance_mechanosensitive_channel	Potassium metabolism	-	Potassium homeostasis
HD37_revised_scaffold49324_1_gene94594	fig|1122989.3.peg.1864__412__Biogenesis_of_c-type_cytochromes__ResA__Cytochrome_c-type_biogenesis_protein_ResA	Respiration	-	Biogenesis of c-type cytochromes
HD18_revised_scaffold68456_3_gene64311	fig|1122989.3.peg.1911__556__Cellulosome__SusD__SusD,_outer_membrane_protein	Carbohydrates	Polysaccharides	Cellulosome
HD40_revised_scaffold6155_2_gene15504	fig|1123008.3.peg.114__769__Fructooligosaccharides(FOS)_and_Raffinose_Utilization__BG__Beta-glucosidase_(EC_3.2.1.21)	Carbohydrates	Di- and oligosaccharides	Fructooligosaccharides(FOS) and Raffinose Utilization
HD1_revised_scaffold22442_2_gene31290	fig|1123008.3.peg.1229__558__Chitin_and_N-acetylglucosamine_utilization__NagB1__Glucosamine-6-phosphate_deaminase_(EC_3.5.99.6)	Carbohydrates	Aminosugars	Chitin and N-acetylglucosamine utilization
HD40_revised_scaffold86827_1_gene139848	fig|1123008.3.peg.2108__556__Cellulosome__SusD__SusD,_outer_membrane_protein	Carbohydrates	Polysaccharides	Cellulosome
HD35_revised_scaffold27990_2_gene139517	fig|1123008.3.peg.2969__199__Ton_and_Tol_transport_systems__TonBR__TonB-dependent_receptor	Membrane Transport	-	Ton and Tol transport systems
LD25_revised_scaffold19087_1_gene12137	fig|1123008.3.peg.3238__558__Chitin_and_N-acetylglucosamine_utilization__NagQ__Predicted_transcriptional_regulator_of_N-Acetylglucosamine_utilization,_GntR_family	Carbohydrates	Aminosugars	Chitin and N-acetylglucosamine utilization
HD37_revised_scaffold4195_2_gene14297	fig|1123008.3.peg.343__779__Galactosylceramide_and_Sulfatide_metabolism__pbDG__probable_beta-D-galactosidase	Sulfur Metabolism	-	Galactosylceramide and Sulfatide metabolism
HD37_revised_C926819_1_gene11458	fig|1123008.3.peg.672__769__Fructooligosaccharides(FOS)_and_Raffinose_Utilization__Aga__Alpha-galactosidase_(EC_3.2.1.22)	Carbohydrates	Di- and oligosaccharides	Fructooligosaccharides(FOS) and Raffinose Utilization
HD38_revised_scaffold41759_9_gene4920	fig|1123008.3.peg.848__183__Thiamin_biosynthesis__THIse2(TenA1)__Thiaminase_II_(EC_3.5.99.2)_involved_in_salvage_of_thiamin_pyrimidine_moiety	Cofactors, Vitamins, Prosthetic Groups, Pigments	-	Thiamin biosynthesis
HD37_revised_scaffold49284_1_gene5068	fig|1123035.3.peg.423__556__Cellulosome__SusD__SusD,_outer_membrane_protein	Carbohydrates	Polysaccharides	Cellulosome
HD38_revised_scaffold11906_15_gene14943	fig|1123226.3.peg.3052__293__Widespread_colonization_island__TadC__Type_II/IV_secretion_system_protein_TadC,_associated_with_Flp_pilus_assembly	Membrane Transport	Protein secretion system, Type II	Widespread colonization island
LD52_revised_scaffold67020_1_gene54307	fig|1123226.3.peg.3549__301__Xylose_utilization__bX_ABCb__Xylose_ABC_transporter,_permease_component	Carbohydrates	Monosaccharides	Xylose utilization
LD61_revised_scaffold24526_1_gene10952	fig|1123226.3.peg.3970__997__Aminoglycoside_adenylyltransferases__N6-ac__Aminoglycoside_N6-acetyltransferase_(EC_2.3.1.82)	Virulence	Resistance to antibiotics and toxic compounds	Aminoglycoside adenylyltransferases
HD35_revised_scaffold14060_4_gene152774	fig|1123226.3.peg.913__769__Fructooligosaccharides(FOS)_and_Raffinose_Utilization__MsmF__Multiple_sugar_ABC_transporter,_membrane-spanning_permease_protein_MsmF	Carbohydrates	Di- and oligosaccharides	Fructooligosaccharides(FOS) and Raffinose Utilization
HD16_revised_scaffold10600_1_gene80143	fig|1123242.3.peg.1170__930__Lysine_fermentation_MCB_432__ECoH__Enoyl-CoA_hydratase_(EC_4.2.1.17)	Amino Acids and Derivatives	Lysine, threonine, methionine, and cysteine	Lysine fermentation MCB 432
HD54_revised_C679173_1_gene8812	fig|1123248.3.peg.1899__210__Transcription_initiation,_bacterial_sigma_factors__sig70__RNA_polymerase_sigma-70_factor	RNA Metabolism	Transcription	Transcription initiation, bacterial sigma factors
HD37_revised_scaffold51661_1_gene51020	fig|1123248.3.peg.2775__1102__Peptidoglycan_Biosynthesis__ddl__D-alanine--D-alanine_ligase_(EC_6.3.2.4)	Cell Wall and Capsule	-	Peptidoglycan Biosynthesis
LD45_revised_scaffold15369_1_gene22443	fig|1123250.4.peg.868__995__Murein_Hydrolases__AmiA__N-acetylmuramoyl-L-alanine_amidase_(EC_3.5.1.28)	Cell Wall and Capsule	-	Murein Hydrolases
HD8_revised_scaffold9469_6_gene106149	fig|1123274.3.peg.2674__1221__Purine_Utilization__XT_19__Xanthine/uracil/thiamine/ascorbate_permease_family_protein	Nucleosides and Nucleotides	Purines	Purine Utilization
HD35_revised_scaffold103874_1_gene43330	fig|1123274.3.peg.2970__800__Glycerol_and_Glycerol-3-phosphate_Uptake_and_Utilization__UgpB__Glycerol-3-phosphate_ABC_transporter,_periplasmic_glycerol-3-phosphate-binding_protein_(TC_3.A.1.1.3)	Carbohydrates	Sugar alcohols	Glycerol and Glycerol-3-phosphate Uptake and Utilization
HD38_revised_scaffold26844_2_gene41678	fig|1123274.3.peg.62__726__Exopolysaccharide_Biosynthesis__Glt2__Glycosyl_transferase,_group_2_family_protein	Cell Wall and Capsule	Capsular and extracellular polysacchrides	Exopolysaccharide Biosynthesis
LD39_revised_scaffold38742_1_gene230	fig|1123274.3.peg.816__900__Alkanesulfonate_assimilation__SSuC__Alkanesulfonates_transport_system_permease_protein	Sulfur Metabolism	Organic sulfur assimilation	Alkanesulfonate assimilation
HD37_revised_scaffold51696_1_gene4613	fig|1123276.3.peg.1924__556__Cellulosome__SusD__SusD,_outer_membrane_protein	Carbohydrates	Polysaccharides	Cellulosome
HD38_revised_scaffold1259_3_gene63201	fig|1123278.3.peg.341__238__Two-component_regulatory_systems_in_Campylobacter__RR__Two-component_system_response_regulator	Regulation and Cell signaling	-	Two-component regulatory systems in Campylobacter
LD54_revised_scaffold43366_1_gene24594	fig|1123278.3.peg.3685__323__cAMP_signaling_in_bacteria__AC__Adenylate_cyclase_(EC_4.6.1.1)	Regulation and Cell signaling	-	cAMP signaling in bacteria
LD78_revised_scaffold31915_1_gene31239	fig|1123278.3.peg.5007__199__Ton_and_Tol_transport_systems__TonBR__TonB-dependent_receptor	Membrane Transport	-	Ton and Tol transport systems
LD86_revised_scaffold53966_2_gene72665	fig|1123298.3.peg.1466__807__Glycogen_metabolism__GP__Glycogen_phosphorylase_(EC_2.4.1.1)	Carbohydrates	Polysaccharides	Glycogen metabolism
HD12_revised_scaffold6794_1_gene51517	fig|1123298.3.peg.1979__1246__Queuosine_exploration_RZ__ppi__Streptococcal_lipoprotein_rotamase_A;_Peptidyl-prolyl_cis-trans_isomerase_(EC_5.2.1.8)	RNA Metabolism	RNA processing and modification	Queuosine exploration RZ
LD33_revised_scaffold49325_2_gene39955	fig|1123304.3.peg.840__90__Sortase__AP__Cell_wall_surface_anchor_family_protein	Cell Wall and Capsule	Gram-Positive cell wall components	Sortase
LD86_revised_C984087_1_gene54326	fig|1123308.3.peg.1845__402__Beta-Glucoside_Metabolism__BglF_B__PTS_system,_beta-glucoside-specific_IIB_component_(EC_2.7.1.69)_/_PTS_system,_beta-glucoside-specific_IIC_component_(EC_2.7.1.69)_/_PTS_system,_beta-glucoside-specific_IIA_component_(EC_2.7.1.69)	Carbohydrates	Di- and oligosaccharides	Beta-Glucoside Metabolism
LD79_revised_scaffold14327_1_gene30680	fig|1123312.3.peg.1766__1072__Nudix_proteins_(nucleoside_triphosphate_hydrolases)__YeaB__Hypothetical_nudix_hydrolase_YeaB	Stress Response	Detoxification	Nudix proteins (nucleoside triphosphate hydrolases)
LD45_revised_scaffold559_4_gene50826	fig|1123312.3.peg.566__769__Fructooligosaccharides(FOS)_and_Raffinose_Utilization__BG__Beta-glucosidase_(EC_3.2.1.21)	Carbohydrates	Di- and oligosaccharides	Fructooligosaccharides(FOS) and Raffinose Utilization
LD60_revised_scaffold36972_1_gene56284	fig|1123317.3.peg.1984__945__Mannose_Metabolism__ManO__Putative_regulator_of_the_mannose_operon,_ManO	Carbohydrates	Monosaccharides	Mannose Metabolism
LD64_revised_scaffold20834_1_gene1738	fig|1123317.3.peg.279__603__Competence_in_Streptococci__ComA__Competence-stimulating_peptide_ABC_transporter_ATP-binding_protein_ComA	DNA Metabolism	DNA uptake, competence	Competence in Streptococci
LD86_revised_scaffold53966_2_gene72664	fig|1123317.3.peg.614__941__Maltose_and_Maltodextrin_Utilization__MalP__Glycogen_phosphorylase_(EC_2.4.1.1)	Carbohydrates	Di- and oligosaccharides	Maltose and Maltodextrin Utilization
LD33_revised_scaffold51617_4_gene7976	fig|1123318.3.peg.1764__740__Fatty_Acid_Biosynthesis_FASII__FabT__Transcriptional_regulator_of_fatty_acid_biosynthesis_FabT	Fatty Acids, Lipids, and Isoprenoids	Fatty acids	Fatty Acid Biosynthesis FASII
HD12_revised_scaffold4068_5_gene51224	fig|1123320.3.peg.9437__586__Cobalt-zinc-cadmium_resistance__TRMer__Transcriptional_regulator,_MerR_family_/_putative_protein_phosphatase	Virulence	Resistance to antibiotics and toxic compounds	Cobalt-zinc-cadmium resistance
LD33_revised_scaffold52019_2_gene16961	fig|1123322.3.peg.2789__1102__Peptidoglycan_Biosynthesis__murD__UDP-N-acetylmuramoylalanine--D-glutamate_ligase_(EC_6.3.2.9)	Cell Wall and Capsule	-	Peptidoglycan Biosynthesis
HD41_revised_scaffold30630_3_gene44669	fig|1123391.3.peg.1266__379__tRNA_modification_Archaea__tusA-like__Rhodanese-like_domain_protein	RNA Metabolism	RNA processing and modification	tRNA modification Archaea
HD18_revised_scaffold29445_3_gene74423	fig|1123400.3.peg.263__1083__Osmoregulation__OmpA__Outer_membrane_protein_A_precursor	Stress Response	Osmotic stress	Osmoregulation
HD23_revised_scaffold35983_1_gene104064	fig|1123511.3.peg.3494__800__Glycerol_and_Glycerol-3-phosphate_Uptake_and_Utilization__UgpC__Glycerol-3-phosphate_ABC_transporter,_ATP-binding_protein_UgpC_(TC_3.A.1.1.3)	Carbohydrates	Sugar alcohols	Glycerol and Glycerol-3-phosphate Uptake and Utilization
LD33_revised_scaffold50948_1_gene24056	fig|1125699.3.peg.720__301__Xylose_utilization__bX_ABCb__Xylose_ABC_transporter,_permease_component	Carbohydrates	Monosaccharides	Xylose utilization
LD33_revised_scaffold50776_6_gene11155	fig|1125699.3.peg.720__301__Xylose_utilization__bX_ABCb__Xylose_ABC_transporter,_permease_component	Carbohydrates	Monosaccharides	Xylose utilization
HD35_revised_scaffold21977_2_gene171044	fig|1125701.3.peg.2207__945__Mannose_Metabolism__ManA__Mannose-6-phosphate_isomerase_(EC_5.3.1.8)	Carbohydrates	Monosaccharides	Mannose Metabolism
HD38_revised_scaffold11699_1_gene22209	fig|1125975.3.peg.161__647__D-ribose_utilization__RbsR__Ribose_operon_repressor	Carbohydrates	Monosaccharides	D-ribose utilization
HD8_revised_scaffold27568_2_gene182494	fig|1125975.3.peg.2577__941__Maltose_and_Maltodextrin_Utilization__MalZ__Maltodextrin_glucosidase_(EC_3.2.1.20)	Carbohydrates	Di- and oligosaccharides	Maltose and Maltodextrin Utilization
HD23_revised_scaffold23822_1_gene26180	fig|1125975.3.peg.611__1242__Pyruvate_metabolism_I:_anaplerotic_reactions,_PEP__MT__Malate_permease	Carbohydrates	Central carbohydrate metabolism	Pyruvate metabolism I: anaplerotic reactions, PEP
HD38_revised_scaffold35151_3_gene36764	fig|1127692.3.peg.1924__156__At5g37530_(CsdL_protein_family)__MnmA__tRNA-specific_2-thiouridylase_MnmA	Sulfur Metabolism	Organic sulfur assimilation	At5g37530 (CsdL protein family)
HD37_revised_scaffold17532_1_gene51759	fig|1127696.3.peg.1135__199__Ton_and_Tol_transport_systems__TonBR__TonB-dependent_receptor	Membrane Transport	-	Ton and Tol transport systems
LD79_revised_C948426_1_gene104685	fig|1128111.3.peg.1084__585__Cobalamin_synthesis__CbiG__Cobalamin_biosynthesis_protein_CbiG	Cofactors, Vitamins, Prosthetic Groups, Pigments	Tetrapyrroles	Cobalamin synthesis
LD53_revised_scaffold35483_1_gene43174	fig|1128111.3.peg.1214__586__Cobalt-zinc-cadmium_resistance__CZCR__Cobalt-zinc-cadmium_resistance_protein	Virulence	Resistance to antibiotics and toxic compounds	Cobalt-zinc-cadmium resistance
LD61_revised_scaffold15596_1_gene20127	fig|1128111.3.peg.1244__1233__Pyridoxin_(Vitamin_B6)_Biosynthesis__PdxK__Pyridoxal_kinase_(EC_2.7.1.35)	Cofactors, Vitamins, Prosthetic Groups, Pigments	Pyridoxine	Pyridoxin (Vitamin B6) Biosynthesis
LD91_revised_scaffold25844_2_gene15444	fig|1128111.3.peg.1287__14__Rhamnose_containing_glycans__11__capsular_polysaccharide_biosynthesis_protein	Cell Wall and Capsule	Capsular and extracellular polysacchrides	Rhamnose containing glycans
LD78_revised_C630278_1_gene106388	fig|1128111.3.peg.1539__199__Ton_and_Tol_transport_systems__exbD__Biopolymer_transport_protein_ExbD/TolR	Membrane Transport	-	Ton and Tol transport systems
LD80_revised_scaffold15343_1_gene72545	fig|1128111.3.peg.1540__199__Ton_and_Tol_transport_systems__tolQ__MotA/TolQ/ExbB_proton_channel_family_protein	Membrane Transport	-	Ton and Tol transport systems
LD3_revised_scaffold27543_1_gene31841	fig|1128111.3.peg.1559__1211__Protocatechuate_branch_of_beta-ketoadipate_pathway__pcaC__4-carboxymuconolactone_decarboxylase_(EC_4.1.1.44)	Metabolism of Aromatic Compounds	Metabolism of central aromatic intermediates	Protocatechuate branch of beta-ketoadipate pathway
LD45_revised_scaffold15681_1_gene40096	fig|1128111.3.peg.1671__1132__Phage_tail_fiber_proteins__TFP__Phage_tail_fiber_protein	Phages, Prophages, Transposable elements, Plasmids	Phages, Prophages	Phage tail fiber proteins
HD8_revised_scaffold92736_1_gene170905	fig|1128111.3.peg.1671__1132__Phage_tail_fiber_proteins__TFP__Phage_tail_fiber_protein	Phages, Prophages, Transposable elements, Plasmids	Phages, Prophages	Phage tail fiber proteins
LD45_revised_scaffold51_3_gene49767	fig|1128111.3.peg.233__845__Hydantoin_metabolism__BUP?__Deacetylases,_including_yeast_histone_deacetylase_and_acetoin_utilization_protein	Nucleosides and Nucleotides	-	Hydantoin metabolism
LD85_revised_scaffold40498_2_gene11100	fig|1128111.3.peg.662__1102__Peptidoglycan_Biosynthesis__FtsI__Cell_division_protein_FtsI_[Peptidoglycan_synthetase]_(EC_2.4.1.129)	Cell Wall and Capsule	-	Peptidoglycan Biosynthesis
LD53_revised_scaffold48390_2_gene20611	fig|1128111.3.peg.662__753__Flagellum_in_Campylobacter__FtsI__Cell_division_protein_FtsI_[Peptidoglycan_synthetase]_(EC_2.4.1.129)	Motility and Chemotaxis	Flagellar motility in Prokaryota	Flagellum in Campylobacter
LD45_revised_scaffold16832_1_gene7533	fig|1128111.3.peg.663__1173__Polyadenylation_bacterial__cca__tRNA_nucleotidyltransferase_(EC_2.7.7.21)_(EC_2.7.7.25)	RNA Metabolism	RNA processing and modification	Polyadenylation bacterial
LD33_revised_scaffold47591_1_gene21403	fig|1130798.3.peg.1756__1246__Queuosine_exploration_RZ__Trans4__Permease_of_the_drug/metabolite_transporter_(DMT)_superfamily	RNA Metabolism	RNA processing and modification	Queuosine exploration RZ
LD36_revised_scaffold18379_1_gene61887	fig|1131731.3.peg.3984__557__Central_meta-cleavage_pathway_of_aromatic_compound_degradation__4-OT__4-oxalocrotonate_tautomerase_(EC_5.3.2.-);_Xylose_transport_system_permease_protein_xylH	Metabolism of Aromatic Compounds	Metabolism of central aromatic intermediates	Central meta-cleavage pathway of aromatic compound degradation
HD8_revised_scaffold9469_6_gene106140	fig|1132836.3.peg.2000__916__Lipopolysaccharide-related_cluster_in_Alphaproteobacteria__MsbA__Lipid_A_export_ATP-binding/permease_protein_MsbA	Cell Wall and Capsule	Gram-Negative cell wall components	Lipopolysaccharide-related cluster in Alphaproteobacteria
LD78_revised_C634474_1_gene82224	fig|1134413.3.peg.997__665__DNA_repair,_bacterial_UmuCD_system__LexA__SOS-response_repressor_and_protease_LexA_(EC_3.4.21.88)	DNA Metabolism	DNA repair	DNA repair, bacterial UmuCD system
HD51_revised_scaffold22811_5_gene41613	fig|1138906.3.peg.109__815__Gram_Positive_Competence__entNuc__DNA-entry_nuclease_(Competence-specific_nuclease)_(EC_3.1.30.-)	DNA Metabolism	DNA uptake, competence	Gram Positive Competence
LD3_revised_scaffold31279_2_gene53712	fig|1138915.3.peg.1141__109__Staphylococcal_pathogenicity_islands_SaPI__Int__Integrase,_superantigen-encoding_pathogenicity_islands_SaPI	Phages, Prophages, Transposable elements, Plasmids	Pathogenicity islands	Staphylococcal pathogenicity islands SaPI
HD12_revised_scaffold4068_5_gene51207	fig|1138915.3.peg.1141__109__Staphylococcal_pathogenicity_islands_SaPI__Int__Integrase,_superantigen-encoding_pathogenicity_islands_SaPI	Phages, Prophages, Transposable elements, Plasmids	Pathogenicity islands	Staphylococcal pathogenicity islands SaPI
HD35_revised_scaffold36344_5_gene83406	fig|1138924.3.peg.2464__759__Folate_Biosynthesis__Trans4__COG0488:_ATPase_components_of_ABC_transporters_with_duplicated_ATPase_domains	Cofactors, Vitamins, Prosthetic Groups, Pigments	Folate and pterines	Folate Biosynthesis
LD5_revised_scaffold7104_2_gene44012	fig|1140.7.peg.599__564__Chlorophyll_Biosynthesis_in_plants_and_prokaryotes__DVR__Divinyl_(proto)chlorophyllide_a_8-vinyl-reductase_(EC_1.3.1.75)	Cofactors, Vitamins, Prosthetic Groups, Pigments	Tetrapyrroles	Chlorophyll Biosynthesis in plants and prokaryotes
LD33_revised_scaffold51146_1_gene61241	fig|1147128.3.peg.496__713__ESAT-6_proteins_secretion_system_in_Mycobacteria_(locus_ESX-1)__Rv3877__Integral_membrane_protein	Membrane Transport	Protein secretion system, Type VII	ESAT-6 proteins secretion system in Mycobacteria (locus ESX-1)
HD37_revised_scaffold23000_1_gene63455	fig|1150600.3.peg.229__802__Glycerolipid_and_Glycerophospholipid_Metabolism_in_Bacteria__plsY__Acyl-phosphate:glycerol-3-phosphate_O-acyltransferase_PlsY	Fatty Acids, Lipids, and Isoprenoids	Phospholipids	Glycerolipid and Glycerophospholipid Metabolism in Bacteria
LD33_revised_scaffold51550_2_gene58356	fig|1150676.3.peg.2009__788__Glutamine,_Glutamate,_Aspartate_and_Asparagine_Biosynthesis__Lrp__Leucine-responsive_regulatory_protein,_regulator_for_leucine_(or_lrp)_regulon_and_high-affinity_branched-chain_amino_acid_transport_system	Amino Acids and Derivatives	Glutamine, glutamate, aspartate, asparagine; ammonia assimilation	Glutamine, Glutamate, Aspartate and Asparagine Biosynthesis
LD61_revised_scaffold11585_2_gene52853	fig|1150775.4.peg.5005__473__CBSS-316057.3.peg.1308__R8__macromolecule_metabolism;_macromolecule_synthesis,_modification;_rna_synthesis,_modification_,_dna_transcription	Clustering-based subsystems	Putative asociate of RNA polymerase sigma-54 factor rpoN	CBSS-316057.3.peg.1308
LD64_revised_scaffold10852_1_gene28733	fig|1150862.3.peg.1884__1228__Aromatic_amino_acid_degradation__7??__Homoprotocatechuate_degradative_operon_repressor	Amino Acids and Derivatives	Aromatic amino acids and derivatives	Aromatic amino acid degradation
HD35_revised_scaffold59841_7_gene81798	fig|1151118.3.peg.1372__885__L-Arabinose_utilization__AraJ__Protein_AraJ_precursor	Carbohydrates	Monosaccharides	L-Arabinose utilization
LD33_revised_scaffold52520_1_gene53593	fig|1151119.3.peg.3006__162__Terminal_cytochrome_C_oxidases__CCOXI__Cytochrome_c_oxidase_polypeptide_I_(EC_1.9.3.1)	Respiration	Electron accepting reactions	Terminal cytochrome C oxidases
HD35_revised_scaffold82115_2_gene70206	fig|1151124.3.peg.5119__867__Iron_siderophore_sensor_&_receptor_system__FeSS__Iron_siderophore_sensor_protein	Iron acquisition and metabolism	Siderophores	Iron siderophore sensor & receptor system
LD33_revised_scaffold8140_1_gene38565	fig|1151126.3.peg.3437__558__Chitin_and_N-acetylglucosamine_utilization__ABCb2__N-Acetyl-D-glucosamine_ABC_transport_system,_permease_protein_2	Carbohydrates	Aminosugars	Chitin and N-acetylglucosamine utilization
HD38_revised_scaffold38044_2_gene62784	fig|1151126.3.peg.3437__558__Chitin_and_N-acetylglucosamine_utilization__ABCb2__N-Acetyl-D-glucosamine_ABC_transport_system,_permease_protein_2	Carbohydrates	Aminosugars	Chitin and N-acetylglucosamine utilization
HD12_revised_scaffold44048_1_gene80526	fig|1151188.3.peg.693__893__LOS_core_oligosaccharide_biosynthesis__WaaV__Beta-1,3-glucosyltransferase	Cell Wall and Capsule	Gram-Negative cell wall components	LOS core oligosaccharide biosynthesis
HD81_revised_scaffold22433_1_gene124708	fig|1154757.4.peg.1126__759__Folate_Biosynthesis__Trans4__COG0488:_ATPase_components_of_ABC_transporters_with_duplicated_ATPase_domains	Cofactors, Vitamins, Prosthetic Groups, Pigments	Folate and pterines	Folate Biosynthesis
HD18_revised_scaffold45295_7_gene48055	fig|1154883.3.peg.434__350__pyrimidine_conversions__udp__Uridine_phosphorylase_(EC_2.4.2.3)	Nucleosides and Nucleotides	Pyrimidines	pyrimidine conversions
LD31_revised_scaffold35426_1_gene57301	fig|1155715.3.peg.5629__945__Mannose_Metabolism__MnnA_16__Alpha-1,2-mannosidase	Carbohydrates	Monosaccharides	Mannose Metabolism
HD12_revised_scaffold6794_1_gene51501	fig|1155718.3.peg.2551__273__Unspecified_monosaccharide_transport_cluster__FtsK__Cell_division_protein_FtsK	Carbohydrates	Monosaccharides	Unspecified monosaccharide transport cluster
HD80_revised_scaffold7598_1_gene2453	fig|1155718.3.peg.2551__273__Unspecified_monosaccharide_transport_cluster__FtsK__Cell_division_protein_FtsK	Carbohydrates	Monosaccharides	Unspecified monosaccharide transport cluster
LD33_revised_scaffold10278_4_gene8869	fig|1155718.3.peg.3161__570__Choline_and_Betaine_Uptake_and_Betaine_Biosynthesis__BetI__HTH-type_transcriptional_regulator_BetI	Stress Response	Osmotic stress	Choline and Betaine Uptake and Betaine Biosynthesis
HD37_revised_scaffold51260_1_gene31230	fig|1156913.3.peg.7040__726__Exopolysaccharide_Biosynthesis__Glt2__Glycosyl_transferase,_group_2_family_protein	Cell Wall and Capsule	Capsular and extracellular polysacchrides	Exopolysaccharide Biosynthesis
LD61_revised_scaffold9648_1_gene70489	fig|1157453.3.peg.2707__611__Copper_homeostasis__CIA__Lead,_cadmium,_zinc_and_mercury_transporting_ATPase_(EC_3.6.3.3)_(EC_3.6.3.5);_Copper-translocating_P-type_ATPase_(EC_3.6.3.4)	Virulence	Resistance to antibiotics and toxic compounds	Copper homeostasis
HD12_revised_scaffold6794_8_gene6469	fig|1157468.3.peg.43__1288__Resistance_to_Vancomycin__vanZ__Protein_VanZ	Virulence	Resistance to antibiotics and toxic compounds	Resistance to Vancomycin
LD33_revised_scaffold50588_2_gene22870	fig|1157640.3.peg.1556__220__Transport_of_Nickel_and_Cobalt__CbiO__ATPase_component_CbiO_of_energizing_module_of_cobalt_ECF_transporter	Membrane Transport	-	Transport of Nickel and Cobalt
LD13_revised_scaffold33880_1_gene830	fig|1157949.3.peg.182__311__YrdC-YciO__COG0613__COG0613,_Predicted_metal-dependent_phosphoesterases_(PHP_family)	RNA Metabolism	RNA processing and modification	YrdC-YciO
LD33_revised_scaffold52552_1_gene9763	fig|1158050.3.peg.1432__402__Beta-Glucoside_Metabolism__LicH__Beta-glucosidase_(EC_3.2.1.21)	Carbohydrates	Di- and oligosaccharides	Beta-Glucoside Metabolism
LD33_revised_scaffold43410_7_gene36259	fig|1158050.3.peg.1884__199__Ton_and_Tol_transport_systems__TolA__TolA_protein	Membrane Transport	-	Ton and Tol transport systems
HD37_revised_scaffold50378_1_gene58976	fig|1158050.3.peg.2768__162__Terminal_cytochrome_C_oxidases__CCOXI__Cytochrome_c_oxidase_polypeptide_I_(EC_1.9.3.1)	Respiration	Electron accepting reactions	Terminal cytochrome C oxidases
LD70_revised_scaffold33727_1_gene39745	fig|1158150.3.peg.721__914__Lipopolysaccharide_assembly__YrbD__Uncharacterized_ABC_transporter,_periplasmic_component_YrbD	Cell Wall and Capsule	Gram-Negative cell wall components	Lipopolysaccharide assembly
HD12_revised_scaffold171_2_gene73620	fig|1158160.3.peg.1719__995__Murein_Hydrolases__MltD__Membrane-bound_lytic_murein_transglycosylase_D_precursor_(EC_3.2.1.-)	Cell Wall and Capsule	-	Murein Hydrolases
HD8_revised_C1561026_1_gene176710	fig|1158541.3.peg.443__12__Restriction-Modification_System__HsdM__Type_I_restriction-modification_system,_DNA-methyltransferase_subunit_M_(EC_2.1.1.72)	DNA Metabolism	-	Restriction-Modification System
LD61_revised_scaffold19746_2_gene14084	fig|1158598.3.peg.1955__941__Maltose_and_Maltodextrin_Utilization__MalF__Maltose/maltodextrin_ABC_transporter,_permease_protein_MalF	Carbohydrates	Di- and oligosaccharides	Maltose and Maltodextrin Utilization
HD12_revised_scaffold4068_18_gene67345	fig|1158601.4.peg.3871__800__Glycerol_and_Glycerol-3-phosphate_Uptake_and_Utilization__GlpG__GlpG_protein_(membrane_protein_of_glp_regulon)	Carbohydrates	Sugar alcohols	Glycerol and Glycerol-3-phosphate Uptake and Utilization
HD65_revised_C531991_1_gene51803	fig|1158602.4.peg.1628__586__Cobalt-zinc-cadmium_resistance__CRA__Cadmium-transporting_ATPase_(EC_3.6.3.3)	Virulence	Resistance to antibiotics and toxic compounds	Cobalt-zinc-cadmium resistance
HD1_revised_scaffold42030_1_gene52140	fig|1158604.4.peg.1105__586__Cobalt-zinc-cadmium_resistance__TRCd__Cd(II)/Pb(II)-responsive_transcriptional_regulator	Virulence	Resistance to antibiotics and toxic compounds	Cobalt-zinc-cadmium resistance
HD1_revised_scaffold42030_1_gene52032	fig|1158607.4.peg.513__637__D-Tagatose_and_Galactitol_Utilization__GatD__Galactitol-1-phosphate_5-dehydrogenase_(EC_1.1.1.251)	Carbohydrates	Monosaccharides	D-Tagatose and Galactitol Utilization
HD16_revised_scaffold74_2_gene8253	fig|1158608.3.peg.2982__79__Signal_peptidase__LepB__Signal_peptidase_I_(EC_3.4.21.89)	Protein Metabolism	Protein processing and modification	Signal peptidase
LD45_revised_scaffold11448_1_gene2331	fig|1158609.4.peg.2476__456__CBSS-257314.1.peg.676__R1__FIG009210:_peptidase,_M16_family	Clustering-based subsystems	Two related proteases	CBSS-257314.1.peg.676
LD33_revised_scaffold50776_7_gene37627	fig|1158610.3.peg.2982__301__Xylose_utilization__XylS__Alpha-xylosidase_(EC_3.2.1.-)	Carbohydrates	Monosaccharides	Xylose utilization
HD8_revised_scaffold9469_6_gene106198	fig|1158622.3.peg.2279__893__LOS_core_oligosaccharide_biosynthesis__WaaV__Beta-1,3-glucosyltransferase	Cell Wall and Capsule	Gram-Negative cell wall components	LOS core oligosaccharide biosynthesis
LD44_revised_scaffold31651_1_gene76839	fig|1158654.3.peg.2742__12__Restriction-Modification_System__HsdM__Type_I_restriction-modification_system,_DNA-methyltransferase_subunit_M_(EC_2.1.1.72)	DNA Metabolism	-	Restriction-Modification System
LD45_revised_C587703_1_gene47709	fig|1158654.3.peg.2742__12__Restriction-Modification_System__HsdM__Type_I_restriction-modification_system,_DNA-methyltransferase_subunit_M_(EC_2.1.1.72)	DNA Metabolism	-	Restriction-Modification System
HD8_revised_scaffold62481_2_gene159928	fig|1158661.3.peg.300__193__Tn552__bin__Resolvase/integrase_Bin	Phages, Prophages, Transposable elements, Plasmids	Transposable elements	Tn552
HD8_revised_scaffold83771_1_gene27348	fig|1158661.3.peg.300__193__Tn552__bin__Resolvase/integrase_Bin	Phages, Prophages, Transposable elements, Plasmids	Transposable elements	Tn552
HD12_revised_scaffold4068_3_gene58546	fig|1159613.3.peg.3728__313__Zinc_regulated_enzymes__COG0523__Uncharacterized_GTP-binding_protein_YjiA	Regulation and Cell signaling	-	Zinc regulated enzymes
LD45_revised_scaffold9112_5_gene15623	fig|1159870.3.peg.3182__914__Lipopolysaccharide_assembly__LolC__Lipoprotein_releasing_system_transmembrane_protein_LolC	Cell Wall and Capsule	Gram-Negative cell wall components	Lipopolysaccharide assembly
HD37_revised_scaffold50168_1_gene22199	fig|1160286.3.peg.872__1143__Phosphate_metabolism__AP__Alkaline_phosphatase_(EC_3.1.3.1)	Phosphorus Metabolism	-	Phosphate metabolism
HD37_revised_scaffold8060_3_gene1115	fig|1160286.3.peg.872__1143__Phosphate_metabolism__AP__Alkaline_phosphatase_(EC_3.1.3.1)	Phosphorus Metabolism	-	Phosphate metabolism
LD82_revised_scaffold6367_1_gene69938	fig|1160705.3.peg.277__740__Fatty_Acid_Biosynthesis_FASII__FabD__Malonyl_CoA-acyl_carrier_protein_transacylase_(EC_2.3.1.39)	Fatty Acids, Lipids, and Isoprenoids	Fatty acids	Fatty Acid Biosynthesis FASII
LD33_revised_scaffold50785_1_gene19699	fig|1166130.5.peg.1500__1056__Nitrate_and_nitrite_ammonification__NaNiS__Nitrate/nitrite_sensor_protein_(EC_2.7.3.-)	Nitrogen Metabolism	-	Nitrate and nitrite ammonification
HD51_revised_scaffold12269_2_gene83537	fig|1166130.5.peg.2730__301__Xylose_utilization__XylR_EC__Xylose_activator_XylR_(AraC_family)	Carbohydrates	Monosaccharides	Xylose utilization
LD45_revised_scaffold14790_3_gene53101	fig|1167007.3.peg.719__750__Ferrous_iron_transporter_EfeUOB,_low-pH-induced__EfeU__Ferrous_iron_transport_permease_EfeU	Iron acquisition and metabolism	-	Ferrous iron transporter EfeUOB, low-pH-induced
LD75_revised_scaffold711_1_gene177668	fig|1167007.3.peg.719__750__Ferrous_iron_transporter_EfeUOB,_low-pH-induced__EfeU__Ferrous_iron_transport_permease_EfeU	Iron acquisition and metabolism	-	Ferrous iron transporter EfeUOB, low-pH-induced
LD61_revised_scaffold18192_1_gene5765	fig|1169143.3.peg.2033__1151__Phospholipid_and_Fatty_acid_biosynthesis_related_cluster__R8__Lysophospholipid_acyltransferase	Fatty Acids, Lipids, and Isoprenoids	Fatty acids	Phospholipid and Fatty acid biosynthesis related cluster
LD33_revised_scaffold30784_1_gene43183	fig|1169144.3.peg.3348__314__Bacitracin_Stress_Response__LiaR__Response_regulator_LiaR	Virulence, Disease and Defense	Bacteriocins, ribosomally synthesized antibacterial peptides	Bacitracin Stress Response
HD16_revised_scaffold10600_1_gene80125	fig|1169145.3.peg.1916__364__tRNA_aminoacylation,_Gly__Gly__Glycyl-tRNA_synthetase_(EC_6.1.1.14)	Protein Metabolism	Protein biosynthesis	tRNA aminoacylation, Gly
LD45_revised_scaffold8280_3_gene30417	fig|1169151.3.peg.3942__586__Cobalt-zinc-cadmium_resistance__TRMer__Transcriptional_regulator,_MerR_family_/_putative_protein_phosphatase	Virulence	Resistance to antibiotics and toxic compounds	Cobalt-zinc-cadmium resistance
HD35_revised_scaffold32625_9_gene31018	fig|1169151.3.peg.4205__301__Xylose_utilization__XynA__Endo-1,4-beta-xylanase_A_precursor_(EC_3.2.1.8)	Carbohydrates	Monosaccharides	Xylose utilization
LD33_revised_scaffold50948_1_gene24059	fig|1169153.3.peg.5389__647__D-ribose_utilization__RbsR__Ribose_operon_repressor	Carbohydrates	Monosaccharides	D-ribose utilization
LD33_revised_C834530_1_gene37448	fig|1169153.3.peg.5389__647__D-ribose_utilization__RbsR__Ribose_operon_repressor	Carbohydrates	Monosaccharides	D-ribose utilization
HD12_revised_scaffold2669_8_gene5128	fig|1169159.3.peg.2070__437__CBSS-196164.1.peg.1690__R1__ABC-type_multidrug_transport_system,_permease_component	Clustering-based subsystems	Cytochrome biogenesis	CBSS-196164.1.peg.1690
LD33_revised_scaffold47591_1_gene21397	fig|1169169.3.peg.3541__647__D-ribose_utilization__RbsK__Ribokinase_(EC_2.7.1.15)	Carbohydrates	Monosaccharides	D-ribose utilization
HD37_revised_scaffold46404_1_gene11965	fig|1169303.3.peg.102__586__Cobalt-zinc-cadmium_resistance__TRMer__Transcriptional_regulator,_MerR_family	Virulence	Resistance to antibiotics and toxic compounds	Cobalt-zinc-cadmium resistance
LD33_revised_scaffold48920_2_gene4157	fig|1170318.3.peg.2150__647__D-ribose_utilization__RbsA__Ribose_ABC_transport_system,_ATP-binding_protein_RbsA_(TC_3.A.1.2.1)	Carbohydrates	Monosaccharides	D-ribose utilization
HD37_revised_scaffold187_2_gene77800	fig|1172178.3.peg.248__551__ABC_transporter_oligopeptide_(TC_3.A.1.5.1)__oppF__Oligopeptide_transport_ATP-binding_protein_OppF_(TC_3.A.1.5.1)	Membrane Transport	ABC transporters	ABC transporter oligopeptide (TC 3.A.1.5.1)
LD33_revised_scaffold50948_1_gene24054	fig|1172178.3.peg.3140__885__L-Arabinose_utilization__AbfA__Alpha-N-arabinofuranosidase_(EC_3.2.1.55)	Carbohydrates	Monosaccharides	L-Arabinose utilization
LD33_revised_scaffold51845_3_gene10297	fig|1172178.3.peg.490__945__Mannose_Metabolism__ManC__Mannose-1-phosphate_guanylyltransferase_(GDP)_(EC_2.7.7.22)	Carbohydrates	Monosaccharides	Mannose Metabolism
LD33_revised_scaffold50355_3_gene51481	fig|1172185.3.peg.5239__918__Lipoprotein_sorting_system__LolD__Lipoprotein_releasing_system_ATP-binding_protein_LolD	Cell Wall and Capsule	Gram-Negative cell wall components	Lipoprotein sorting system
HD37_revised_scaffold45856_1_gene22025	fig|1184609.3.peg.363__827__Heat_shock_dnaK_gene_cluster_extended__SAM-HSP__Hypothetical_radical_SAM_family_enzyme_in_heat_shock_gene_cluster,_similarity_with_CPO_of_BS_HemN-type	Stress Response	Heat shock	Heat shock dnaK gene cluster extended
LD21_revised_scaffold5722_2_gene20121	fig|1191309.3.peg.2212__587__Coenzyme_A_Biosynthesis__KARED__Ketol-acid_reductoisomerase_(EC_1.1.1.86)	Cofactors, Vitamins, Prosthetic Groups, Pigments	Coenzyme A	Coenzyme A Biosynthesis
HD12_revised_scaffold4387_6_gene72141	fig|1191309.3.peg.2212__587__Coenzyme_A_Biosynthesis__KARED__Ketol-acid_reductoisomerase_(EC_1.1.1.86)	Cofactors, Vitamins, Prosthetic Groups, Pigments	Coenzyme A	Coenzyme A Biosynthesis
HD1_revised_scaffold15126_4_gene77850	fig|1192197.3.peg.2241__239__BEY_LIP__PdhB__Dihydrolipoamide_acetyltransferase_component_of_pyruvate_dehydrogenase_complex_(EC_2.3.1.12)	Cofactors, Vitamins, Prosthetic Groups, Pigments	Lipoic acid	BEY LIP
LD45_revised_scaffold10552_1_gene29037	fig|1192688.3.peg.2354__1099__Peptide_ABC_transport_system_Sap__SapB__Peptide_transport_system_permease_protein_SapB	Membrane Transport	ABC transporters	Peptide ABC transport system Sap
LD63_revised_scaffold14279_3_gene36437	fig|1194526.3.peg.1572__323__cAMP_signaling_in_bacteria__Clp2__Prophage_Clp_protease-like_protein	Regulation and Cell signaling	-	cAMP signaling in bacteria
HD16_revised_scaffold11112_2_gene113769	fig|1195236.3.peg.1011__273__Unspecified_monosaccharide_transport_cluster__ACT__ACT_domain_protein	Carbohydrates	Monosaccharides	Unspecified monosaccharide transport cluster
HD8_revised_scaffold8835_2_gene68035	fig|1195236.3.peg.4218__101__Sporulation_Cluster__R6__Spore_cortex_biosynthesis_protein	Dormancy and Sporulation	-	Sporulation Cluster
LD33_revised_scaffold51627_1_gene35122	fig|1195236.3.peg.4310__800__Glycerol_and_Glycerol-3-phosphate_Uptake_and_Utilization__pGTP__Probable_glycerol_transport_protein	Carbohydrates	Sugar alcohols	Glycerol and Glycerol-3-phosphate Uptake and Utilization
LD54_revised_scaffold30008_1_gene56180	fig|1195236.3.peg.4526__14__Rhamnose_containing_glycans__10__Teichoic_acid_export_ATP-binding_protein_TagH_(EC_3.6.3.40)	Cell Wall and Capsule	Capsular and extracellular polysacchrides	Rhamnose containing glycans
HD12_revised_scaffold2669_8_gene5130	fig|1195236.3.peg.4526__14__Rhamnose_containing_glycans__10__Teichoic_acid_export_ATP-binding_protein_TagH_(EC_3.6.3.40)	Cell Wall and Capsule	Capsular and extracellular polysacchrides	Rhamnose containing glycans
HD1_revised_scaffold42047_1_gene51042	fig|1195236.3.peg.5226__403__Beta-lactamase__BLc__Beta-lactamase_class_C_and_other_penicillin_binding_proteins	Virulence	Resistance to antibiotics and toxic compounds	Beta-lactamase
HD35_revised_scaffold32607_9_gene23826	fig|1195464.3.peg.1326__712__ESAT-6_proteins_secretion_system_in_Firmicutes__EsaA__Putative_secretion_accessory_protein_EsaA/YueB_/_Bacteriophage_SPP1_receptor	Membrane Transport	Protein secretion system, Type VII	ESAT-6 proteins secretion system in Firmicutes
LD33_revised_scaffold52497_3_gene54900	fig|1196031.3.peg.333__712__ESAT-6_proteins_secretion_system_in_Firmicutes__EsaA__Putative_secretion_accessory_protein_EsaA/YueB	Membrane Transport	Protein secretion system, Type VII	ESAT-6 proteins secretion system in Firmicutes
LD52_revised_C804864_1_gene70763	fig|1196031.3.peg.333__712__ESAT-6_proteins_secretion_system_in_Firmicutes__EsaA__Putative_secretion_accessory_protein_EsaA/YueB	Membrane Transport	Protein secretion system, Type VII	ESAT-6 proteins secretion system in Firmicutes
HD62_revised_scaffold75401_1_gene64524	fig|1198452.4.peg.2926__1040__N-Acetyl-Galactosamine_and_Galactosamine_Utilization__AgaM__Beta-phosphoglucomutase_(EC_5.4.2.6)	Carbohydrates	Aminosugars	N-Acetyl-Galactosamine and Galactosamine Utilization
HD18_revised_scaffold45295_7_gene48065	fig|1198630.3.peg.559__1143__Phosphate_metabolism__MDIP__Manganese-dependent_inorganic_pyrophosphatase_(EC_3.6.1.1)	Phosphorus Metabolism	-	Phosphate metabolism
LD61_revised_scaffold19746_2_gene14085	fig|1201038.3.peg.1266__558__Chitin_and_N-acetylglucosamine_utilization__ABCc__N-Acetyl-D-glucosamine_ABC_transport_system,_sugar-binding_protein	Carbohydrates	Aminosugars	Chitin and N-acetylglucosamine utilization
LD38_revised_scaffold25637_2_gene96492	fig|1202533.3.peg.1165__301__Xylose_utilization__bX_ABCa__Xylose_ABC_transporter,_substrate-binding_component	Carbohydrates	Monosaccharides	Xylose utilization
HD8_revised_scaffold20479_1_gene47830	fig|1202534.3.peg.25__535__Capsular_heptose_biosynthesis__ManDH__GDP-mannose_4,6-dehydratase_(EC_4.2.1.47)	Cell Wall and Capsule	Capsular and extracellular polysacchrides	Capsular heptose biosynthesis
HD12_revised_scaffold6399_3_gene20354	fig|1202534.3.peg.2885__1248__Arsenic_resistance__arsB__Arsenic_efflux_pump_protein	Virulence	Resistance to antibiotics and toxic compounds	Arsenic resistance
HD16_revised_scaffold11112_2_gene113780	fig|1202534.3.peg.2885__1248__Arsenic_resistance__arsB__Arsenic_efflux_pump_protein	Virulence	Resistance to antibiotics and toxic compounds	Arsenic resistance
HD65_revised_scaffold18836_1_gene76686	fig|1202534.3.peg.527__941__Maltose_and_Maltodextrin_Utilization__MalS__Periplasmic_alpha-amylase_(EC_3.2.1.1)	Carbohydrates	Di- and oligosaccharides	Maltose and Maltodextrin Utilization
LD60_revised_scaffold49386_1_gene96724	fig|1203195.3.peg.664__1075__O-antigen_capsule_important_for_environmental_persistence__YihV__Sugar_kinase_YihV	Stress Response	Dessication stress	O-antigen capsule important for environmental persistence
LD33_revised_scaffold51212_2_gene54880	fig|1203540.3.peg.1048__120__Streptococcus_pneumoniae_Vancomycin_Tolerance_Locus__vex3__ABC_transporter_membrane-spanning_permease,_Pep_export,_Vex3	Virulence	Resistance to antibiotics and toxic compounds	Streptococcus pneumoniae Vancomycin Tolerance Locus
LD45_revised_scaffold16599_1_gene8621	fig|1203540.3.peg.1600__348__pVir_Plasmid_of_Campylobacter__Cjp26__Plasmid_partitioning_protein_ParA	Membrane Transport	Protein and nucleoprotein secretion system, Type IV	pVir Plasmid of Campylobacter
LD33_revised_scaffold52019_2_gene16956	fig|1203540.3.peg.1606__90__Sortase__AP__Cell_wall_surface_anchor_family_protein	Cell Wall and Capsule	Gram-Positive cell wall components	Sortase
LD38_revised_scaffold9829_2_gene109000	fig|1203540.3.peg.2057__811__Glycolysis_and_Gluconeogenesis,_including_Archaeal_enzymes__PgM__Glucosyl-3-phosphoglycerate_phosphatase_(EC_3.1.3.85)	Carbohydrates	Central carbohydrate metabolism	Glycolysis and Gluconeogenesis, including Archaeal enzymes
LD33_revised_scaffold49375_1_gene16554	fig|1203540.3.peg.279__750__Ferrous_iron_transporter_EfeUOB,_low-pH-induced__EfeU__Ferrous_iron_transport_permease_EfeU	Iron acquisition and metabolism	-	Ferrous iron transporter EfeUOB, low-pH-induced
LD38_revised_scaffold53396_1_gene24711	fig|1203540.3.peg.53__769__Fructooligosaccharides(FOS)_and_Raffinose_Utilization__BG__Beta-glucosidase_(EC_3.2.1.21)	Carbohydrates	Di- and oligosaccharides	Fructooligosaccharides(FOS) and Raffinose Utilization
LD33_revised_scaffold48920_2_gene4156	fig|1203540.3.peg.904__647__D-ribose_utilization__RbsC__Ribose_ABC_transport_system,_permease_protein_RbsC_(TC_3.A.1.2.1)	Carbohydrates	Monosaccharides	D-ribose utilization
HD38_revised_scaffold35151_3_gene36778	fig|1203550.3.peg.1582__802__Glycerolipid_and_Glycerophospholipid_Metabolism_in_Bacteria__ACP__Acyl_carrier_protein	Fatty Acids, Lipids, and Isoprenoids	Phospholipids	Glycerolipid and Glycerophospholipid Metabolism in Bacteria
LD52_revised_scaffold31301_1_gene56457	fig|1203554.3.peg.874__323__cAMP_signaling_in_bacteria__AC__Adenylate_cyclase_(EC_4.6.1.1)	Regulation and Cell signaling	-	cAMP signaling in bacteria
HD23_revised_scaffold41143_2_gene15199	fig|1203555.3.peg.1341__497__CBSS-49338.1.peg.459__R?2__TRAP-type_uncharacterized_transport_system,_fused_permease_component	Clustering-based subsystems	Tricarboxylate transporter	CBSS-49338.1.peg.459
HD6_revised_scaffold58055_1_gene18164	fig|1203555.3.peg.2046__364__tRNA_aminoacylation,_Gly__G-beta__Glycyl-tRNA_synthetase_beta_chain_(EC_6.1.1.14)	Protein Metabolism	Protein biosynthesis	tRNA aminoacylation, Gly
LD53_revised_C934097_1_gene99312	fig|1203593.3.peg.1261__749__Fermentations:_Mixed_acid__FSP__Sugar/maltose_fermentation_stimulation_protein_homolog	Carbohydrates	Fermentation	Fermentations: Mixed acid
LD79_revised_scaffold42945_1_gene77024	fig|1203593.3.peg.1290__611__Copper_homeostasis__CIA__Lead,_cadmium,_zinc_and_mercury_transporting_ATPase_(EC_3.6.3.3)_(EC_3.6.3.5);_Copper-translocating_P-type_ATPase_(EC_3.6.3.4)	Virulence	Resistance to antibiotics and toxic compounds	Copper homeostasis
LD3_revised_C631839_1_gene94353	fig|1203593.3.peg.1293__1086__Oxidative_stress__Osmcl__Organic_hydroperoxide_resistance_transcriptional_regulator	Stress Response	Oxidative stress	Oxidative stress
LD53_revised_scaffold54549_2_gene101022	fig|1203593.3.peg.1472__1072__Nudix_proteins_(nucleoside_triphosphate_hydrolases)__YeaB__Hypothetical_nudix_hydrolase_YeaB	Stress Response	Detoxification	Nudix proteins (nucleoside triphosphate hydrolases)
LD45_revised_scaffold22404_2_gene33672	fig|1203593.3.peg.1505__1102__Peptidoglycan_Biosynthesis__PBP__Multimodular_transpeptidase-transglycosylase_(EC_2.4.1.129)_(EC_3.4.-.-)	Cell Wall and Capsule	-	Peptidoglycan Biosynthesis
LD1_revised_scaffold21791_1_gene64135	fig|1203593.3.peg.1530__273__Unspecified_monosaccharide_transport_cluster__ACT__ACT_domain_protein	Carbohydrates	Monosaccharides	Unspecified monosaccharide transport cluster
LD88_revised_scaffold15198_1_gene42215	fig|1203593.3.peg.387__432__CBSS-176299.4.peg.1292__R7__DNA_recombination_and_repair_protein_RecO	Clustering-based subsystems	Probably GTP or GMP signaling related	CBSS-176299.4.peg.1292
LD54_revised_scaffold25708_1_gene30966	fig|1203593.3.peg.387__432__CBSS-176299.4.peg.1292__R7__DNA_recombination_and_repair_protein_RecO	Clustering-based subsystems	Probably GTP or GMP signaling related	CBSS-176299.4.peg.1292
LD45_revised_scaffold10666_1_gene37308	fig|1203593.3.peg.421__1205__Protein_chaperones__ClpB__ClpB_protein	Protein Metabolism	Protein folding	Protein chaperones
LD45_revised_scaffold27611_1_gene51685	fig|1203593.3.peg.436__723__Ethanolamine_utilization__RespReg__Ethanolamine_two-component_response_regulator	Carbohydrates	Sugar alcohols	Ethanolamine utilization
LD45_revised_scaffold27611_2_gene50542	fig|1203593.3.peg.440__311__YrdC-YciO__yeaZ__TsaB_protein,_required_for_threonylcarbamoyladenosine_(t(6)A)_formation_in_tRNA	RNA Metabolism	RNA processing and modification	YrdC-YciO
LD66_revised_scaffold26712_1_gene37200	fig|1203593.3.peg.507__1083__Osmoregulation__OmpA__Outer_membrane_protein_A_precursor	Stress Response	Osmotic stress	Osmoregulation
LD45_revised_scaffold11448_1_gene2332	fig|1203593.3.peg.528__1246__Queuosine_exploration_RZ__GluQRS__glutamyl-Q-tRNA_synthetase	RNA Metabolism	RNA processing and modification	Queuosine exploration RZ
HD5_revised_scaffold21880_1_gene36279	fig|1203593.3.peg.560__808__Glycolate,_glyoxylate_interconversions__2PGP__Phosphoglycolate_phosphatase_(EC_3.1.3.18)	Carbohydrates	Central carbohydrate metabolism	Glycolate, glyoxylate interconversions
LD45_revised_scaffold6331_1_gene16556	fig|1203593.3.peg.891__675__De_Novo_Purine_Biosynthesis__PurE__Phosphoribosylaminoimidazole_carboxylase_catalytic_subunit_(EC_4.1.1.21)	Nucleosides and Nucleotides	Purines	De Novo Purine Biosynthesis
LD64_revised_C677044_1_gene74318	fig|1203593.3.peg.898__969__Methionine_Biosynthesis__HSM__Homocysteine_S-methyltransferase_(EC_2.1.1.10)	Amino Acids and Derivatives	Lysine, threonine, methionine, and cysteine	Methionine Biosynthesis
HD8_revised_scaffold104140_2_gene112337	fig|1203605.3.peg.2298__1280__RecA_and_RecX__RecX__Regulatory_protein_RecX	DNA Metabolism	DNA repair	RecA and RecX
HD18_revised_scaffold34932_3_gene33805	fig|1203606.4.peg.1526__983__Molybdenum_cofactor_biosynthesis__modEdna__DNA-binding_domain_of_ModE	Cofactors, Vitamins, Prosthetic Groups, Pigments	Folate and pterines	Molybdenum cofactor biosynthesis
HD8_revised_scaffold9469_6_gene106194	fig|1203606.4.peg.2460__87__Soluble_cytochromes_and_functionally_related_electron_carriers__Fx__Ferredoxin	Respiration	-	Soluble cytochromes and functionally related electron carriers
LD78_revised_scaffold36239_1_gene54355	fig|1203606.4.peg.2811__315__2-phosphoglycolate_salvage__PGPase__Phosphoglycolate_phosphatase_(EC_3.1.3.18)	DNA Metabolism	DNA repair	2-phosphoglycolate salvage
HD5_revised_scaffold20478_1_gene105923	fig|1203606.4.peg.370__350__pyrimidine_conversions__bntp__Bis(5-nucleosyl)-tetraphosphatase_(asymmetrical)_(EC_3.6.1.17)	Nucleosides and Nucleotides	Pyrimidines	pyrimidine conversions
HD16_revised_scaffold36537_2_gene44979	fig|1203606.4.peg.635__892__LMPTP_YwlE_cluster__YwlG__Hypothetical_protein_ywlG	Clustering-based subsystems	-	LMPTP YwlE cluster
LD61_revised_scaffold19165_3_gene61248	fig|1204340.4.peg.151__989__Multidrug_Resistance_Efflux_Pumps__MFS__Multidrug-efflux_transporter,_major_facilitator_superfamily_(MFS)_(TC_2.A.1)	Virulence	Resistance to antibiotics and toxic compounds	Multidrug Resistance Efflux Pumps
LD38_revised_scaffold53358_2_gene26078	fig|1204340.4.peg.468__758__Adaptation_to_d-cysteine__CPP__Cystine_ABC_transporter,_permease_protein	Virulence	Resistance to antibiotics and toxic compounds	Adaptation to d-cysteine
LD33_revised_scaffold40866_2_gene49092	fig|1206739.4.peg.3309__417__Biotin_biosynthesis__BioM__ATPase_component_BioM_of_energizing_module_of_biotin_ECF_transporter	Cofactors, Vitamins, Prosthetic Groups, Pigments	Biotin	Biotin biosynthesis
HD8_revised_scaffold76983_1_gene192906	fig|1207470.4.peg.732__155__Teichoic_and_lipoteichoic_acids_biosynthesis__DltS__Two-component_system_histidine_kinase	Cell Wall and Capsule	Gram-Positive cell wall components	Teichoic and lipoteichoic acids biosynthesis
HD12_revised_scaffold2669_8_gene5131	fig|1207544.3.peg.1318__770__Fructose_and_Mannose_Inducible_PTS__LevS__fructose_sensor_histidine_kinase	Membrane Transport	Sugar Phosphotransferase Systems, PTS	Fructose and Mannose Inducible PTS
LD33_revised_scaffold43236_3_gene21340	fig|1207545.3.peg.1656__995__Murein_Hydrolases__AmiA__N-acetylmuramoyl-L-alanine_amidase_(EC_3.5.1.28)	Cell Wall and Capsule	-	Murein Hydrolases
LV8_revised_scaffold28406_2_gene15159	fig|1209989.3.peg.1018__305__YebC__YchF__GTP-binding_and_nucleic_acid-binding_protein_YchF	Miscellaneous	Plant-Prokaryote comparative genomics	YebC
HD62_revised_scaffold1091_2_gene17652	fig|1209989.3.peg.986__160__TenI-like_tautomerase__SecA__Protein_translocase_subunit_SecA	Clustering-based subsystems	-	TenI-like tautomerase
HD37_revised_scaffold50168_1_gene22203	fig|1211579.3.peg.767__867__Iron_siderophore_sensor_&_receptor_system__FeSS__Iron_siderophore_sensor_protein	Iron acquisition and metabolism	Siderophores	Iron siderophore sensor & receptor system
HD35_revised_scaffold30263_3_gene65190	fig|1211819.3.peg.3174__1246__Queuosine_exploration_RZ__Trans4__Permease_of_the_drug/metabolite_transporter_(DMT)_superfamily	RNA Metabolism	RNA processing and modification	Queuosine exploration RZ
HD12_revised_scaffold4068_18_gene67351	fig|1212547.3.peg.878__827__Heat_shock_dnaK_gene_cluster_extended__MiaB-fam__tRNA-t(6)A37_methylthiotransferase	Stress Response	Heat shock	Heat shock dnaK gene cluster extended
LD85_revised_scaffold66175_1_gene60526	fig|1214101.3.peg.5975__586__Cobalt-zinc-cadmium_resistance__TRMer__Transcriptional_regulator,_MerR_family_/_putative_protein_phosphatase	Virulence	Resistance to antibiotics and toxic compounds	Cobalt-zinc-cadmium resistance
HD8_revised_scaffold92736_1_gene170904	fig|1214117.4.peg.1343__1281__Recycling_of_Peptidoglycan_Amino_Acids__AmiD__N-acetylmuramoyl-L-alanine_amidase_(EC_3.5.1.28)	Cell Wall and Capsule	-	Recycling of Peptidoglycan Amino Acids
HD16_revised_scaffold11112_2_gene113793	fig|1214564.3.peg.2106__101__Sporulation_Cluster__DivIC__Cell_division_protein_DivIC_(FtsB),_stabilizes_FtsL_against_RasP_cleavage	Dormancy and Sporulation	-	Sporulation Cluster
HD35_revised_scaffold75691_1_gene91760	fig|1214564.3.peg.2421__402__Beta-Glucoside_Metabolism__CepA__Cellobiose_phosphorylase_(EC_2.4.1.-)	Carbohydrates	Di- and oligosaccharides	Beta-Glucoside Metabolism
LD66_revised_scaffold857_1_gene66451	fig|1216007.3.peg.1108__248__Type_VI_secretion_systems__PppA__Phosphoprotein_phosphatase_PppA	Membrane Transport	Protein secretion system, Type VI	Type VI secretion systems
HD38_revised_scaffold1267_1_gene15021	fig|1216967.5.peg.442__199__Ton_and_Tol_transport_systems__TonBR__TonB-dependent_receptor	Membrane Transport	-	Ton and Tol transport systems
LD33_revised_C827554_1_gene33724	fig|1216967.6.peg.1732__885__L-Arabinose_utilization__AraJ__Protein_AraJ_precursor	Carbohydrates	Monosaccharides	L-Arabinose utilization
HD35_revised_scaffold102575_2_gene113724	fig|1216967.6.peg.656__843__Housecleaning_nucleoside_triphosphate_pyrophosphatases__YjjG__5-nucleotidase_YjjG_(EC_3.1.3.5)	Stress Response	Detoxification	Housecleaning nucleoside triphosphate pyrophosphatases
LD61_revised_scaffold11834_1_gene5177	fig|121723.5.peg.2531__757__Flavohaemoglobin__Cl__H(+)/Cl(-)_exchange_transporter_ClcA	Stress Response	-	Flavohaemoglobin
HD8_revised_scaffold24596_3_gene16515	fig|1217638.3.peg.3779__441__CBSS-203122.12.peg.188__R12__ISPsy4,_transposase	Phages, Prophages, Transposable elements, Plasmids	Transposable elements	CBSS-203122.12.peg.188
LD33_revised_scaffold49698_3_gene15001	fig|1217668.3.peg.2293__78__SigmaB_stress_responce_regulation__RsbU__Serine_phosphatase_RsbU,_regulator_of_sigma_subunit	Stress Response	-	SigmaB stress responce regulation
HD37_revised_scaffold44778_2_gene7203	fig|1217675.3.peg.1098__453__CBSS-246196.1.peg.364__R2__3-oxoacyl-[acyl-carrier_protein]_reductase_(EC_1.1.1.100)	Clustering-based subsystems	Fatty acid metabolic cluster	CBSS-246196.1.peg.364
HD37_revised_C917142_1_gene86534	fig|1217985.3.peg.3637__315__2-phosphoglycolate_salvage__PGPase__Phosphoglycolate_phosphatase_(EC_3.1.3.18)	DNA Metabolism	DNA repair	2-phosphoglycolate salvage
LD42_revised_scaffold28125_1_gene56108	fig|1218108.3.peg.1326__323__cAMP_signaling_in_bacteria__ElaA__N-acetyltransferase_ElaA	Regulation and Cell signaling	-	cAMP signaling in bacteria
HD26_revised_scaffold13287_1_gene22232	fig|1218173.3.peg.3662__892__LMPTP_YwlE_cluster__YwlD__Hypothetical_transmembrane_protein_ywlD	Clustering-based subsystems	-	LMPTP YwlE cluster
LD85_revised_scaffold9961_2_gene29823	fig|1219071.3.peg.4471__265__Unknown_carbohydrate_utilization_(_cluster_Ydj_)__YeaE__Putative_oxidoreductase_YeaE,_aldo/keto_reductase_family	Carbohydrates	-	Unknown carbohydrate utilization ( cluster Ydj )
LD54_revised_scaffold13378_1_gene31679	fig|1219076.4.peg.3932__1242__Pyruvate_metabolism_I:_anaplerotic_reactions,_PEP__MNaT__Malate_Na(+)_symporter	Carbohydrates	Central carbohydrate metabolism	Pyruvate metabolism I: anaplerotic reactions, PEP
HD16_revised_scaffold11112_2_gene113765	fig|1219077.3.peg.2750__581__Cluster-based_Subsystem_Grouping_Hypotheticals_-_perhaps_Proteosome_Related__FIG005666__FIG005666:_putative_helicase	Clustering-based subsystems	proteosome related	Cluster-based Subsystem Grouping Hypotheticals - perhaps Proteosome Related
LD45_revised_scaffold18990_2_gene51383	fig|1223545.3.peg.3418__459__CBSS-262316.1.peg.2929__Perm1__Amino_acid_permease_in_hypothetical_Actinobacterial_gene_cluster	Clustering-based subsystems	Catabolism of an unknown compound	CBSS-262316.1.peg.2929
HD37_revised_scaffold42999_2_gene3162	fig|1224145.3.peg.4576__991__Multidrug_Resistance,_2-protein_version_Found_in_Gram-positive_bacteria__A__Multidrug_resistance_protein_[function_not_yet_clear]	Virulence	Resistance to antibiotics and toxic compounds	Multidrug Resistance, 2-protein version Found in Gram-positive bacteria
HD12_revised_scaffold2669_7_gene12406	fig|1224145.3.peg.5505__601__Commensurate_regulon_activation__Rob__Right_origin-binding_protein	Stress Response	-	Commensurate regulon activation
HD1_revised_scaffold42030_1_gene52070	fig|1230343.3.peg.1477__903__Legionella_pneumophila_Virulome__SecE__Preprotein_translocase_subunit_SecE_(TC_3.A.5.1.1)	Virulence, Disease and Defense	-	Legionella pneumophila Virulome
HD37_revised_scaffold51106_1_gene61121	fig|1230477.3.peg.4678__815__Gram_Positive_Competence__comC__Late_competence_protein_ComC,_processing_protease;_Leader_peptidase_(Prepilin_peptidase)_(EC_3.4.23.43)_/_N-methyltransferase_(EC_2.1.1.-)	DNA Metabolism	DNA uptake, competence	Gram Positive Competence
HV6_revised_scaffold1072_10_gene88820	fig|1230477.3.peg.726__897__Lactose_and_Galactose_Uptake_and_Utilization__GanA__Arabinogalactan_endo-1,4-beta-galactosidase_(EC_3.2.1.89)	Carbohydrates	Di- and oligosaccharides	Lactose and Galactose Uptake and Utilization
LD4_revised_scaffold39884_1_gene35301	fig|123214.3.peg.430__441__CBSS-203122.12.peg.188__R8__MG(2+)_CHELATASE_FAMILY_PROTEIN_/_ComM-related_protein	Phages, Prophages, Transposable elements, Plasmids	Transposable elements	CBSS-203122.12.peg.188
LD54_revised_scaffold38108_2_gene24810	fig|1232426.4.peg.1010__769__Fructooligosaccharides(FOS)_and_Raffinose_Utilization__MsmF__Multiple_sugar_ABC_transporter,_membrane-spanning_permease_protein_MsmF	Carbohydrates	Di- and oligosaccharides	Fructooligosaccharides(FOS) and Raffinose Utilization
HD35_revised_scaffold25505_2_gene140418	fig|1232426.4.peg.1010__769__Fructooligosaccharides(FOS)_and_Raffinose_Utilization__MsmF__Multiple_sugar_ABC_transporter,_membrane-spanning_permease_protein_MsmF	Carbohydrates	Di- and oligosaccharides	Fructooligosaccharides(FOS) and Raffinose Utilization
HD18_revised_scaffold45295_7_gene48051	fig|1234664.3.peg.3754__1260__RCJ_pfr__feoA__Ferrous_iron_transport_protein_A	Iron acquisition and metabolism	-	RCJ pfr
HD16_revised_scaffold55316_1_gene5164	fig|1235279.3.peg.1617__107__Sporulation-associated_proteins_with_broader_functions__SigH__RNA_polymerase_sporulation_specific_sigma_factor_SigH	Dormancy and Sporulation	-	Sporulation-associated proteins with broader functions
HD8_revised_scaffold111899_1_gene38457	fig|1235279.3.peg.2807__477__A_TRAP_transporter_and_a_hypothetical__DctP__TRAP_transporter_solute_receptor,_unknown_substrate_1	Membrane Transport	TRAP transporters	A TRAP transporter and a hypothetical
HD37_revised_scaffold187_2_gene77774	fig|1235785.3.peg.1832__301__Xylose_utilization__xyl3__Beta-xylosidase_(EC_3.2.1.37)	Carbohydrates	Monosaccharides	Xylose utilization
HD37_revised_scaffold49239_1_gene46663	fig|1235785.3.peg.4029__528__Calvin-Benson_cycle__TPI__Triosephosphate_isomerase_(EC_5.3.1.1)	Carbohydrates	CO2 fixation	Calvin-Benson cycle
HD38_revised_scaffold319_11_gene7930	fig|1235785.3.peg.557__14__Rhamnose_containing_glycans__rgpA__Alpha-D-GlcNAc_alpha-1,2-L-rhamnosyltransferase_(EC_2.4.1.-)	Cell Wall and Capsule	Capsular and extracellular polysacchrides	Rhamnose containing glycans
HD37_revised_scaffold45569_1_gene91060	fig|1235785.3.peg.811__1064__Nonmevalonate_Branch_of_Isoprenoid_Biosynthesis__ISPE__4-diphosphocytidyl-2-C-methyl-D-erythritol_kinase_(EC_2.7.1.148)	Fatty Acids, Lipids, and Isoprenoids	Isoprenoids	Nonmevalonate Branch of Isoprenoid Biosynthesis
HD62_revised_scaffold57988_1_gene105900	fig|1235787.3.peg.1267__945__Mannose_Metabolism__MnnB__Beta-mannosidase_(EC_3.2.1.25)	Carbohydrates	Monosaccharides	Mannose Metabolism
HD35_revised_scaffold82182_4_gene31536	fig|1235787.3.peg.1899__199__Ton_and_Tol_transport_systems__TonBR__TonB-dependent_receptor	Membrane Transport	-	Ton and Tol transport systems
HD37_revised_scaffold49284_1_gene5066	fig|1235787.3.peg.1901__635__D-Galacturonate_and_D-Glucuronate_Utilization__RhiN__Rhamnogalacturonides_degradation_protein_RhiN	Carbohydrates	Monosaccharides	D-Galacturonate and D-Glucuronate Utilization
HD37_revised_scaffold50552_2_gene31348	fig|1235787.3.peg.3797__558__Chitin_and_N-acetylglucosamine_utilization__ChiA_20__Chitinase_(EC_3.2.1.14)	Carbohydrates	Aminosugars	Chitin and N-acetylglucosamine utilization
LD73_revised_scaffold4702_2_gene84542	fig|1235787.3.peg.510__301__Xylose_utilization__XylS__Alpha-xylosidase_(EC_3.2.1.-)	Carbohydrates	Monosaccharides	Xylose utilization
HD37_revised_scaffold51526_2_gene87261	fig|1235787.3.peg.750__917__Lipoprotein_Biosynthesis__Lgt__Prolipoprotein_diacylglyceryl_transferase_(EC_2.4.99.-)	Protein Metabolism	Protein processing and modification	Lipoprotein Biosynthesis
HD37_revised_C918721_1_gene29671	fig|1235788.3.peg.1270__1043__N-linked_Glycosylation_in_Bacteria__WlaB__Phospholipid-lipopolysaccharide_ABC_transporter	Protein Metabolism	Protein processing and modification	N-linked Glycosylation in Bacteria
HD35_revised_scaffold4672_2_gene44530	fig|1235788.3.peg.1453__1048__Na+_translocating_decarboxylases_and_related_biotin-dependent_enzymes__ODC_b__Oxaloacetate_decarboxylase_beta_chain_(EC_4.1.1.3)_/_Methylmalonyl-CoA_decarboxylase,_beta_chain_(EC_4.1.1.41)	Respiration	Sodium Ion-Coupled Energetics	Na+ translocating decarboxylases and related biotin-dependent enzymes
HD47_revised_scaffold15364_1_gene34928	fig|1235788.3.peg.195__1176__Polyglycerolphosphate_lipoteichoic_acid_biosynthesis__LtaS-IVb__Lipoteichoic_acid_synthase_LtaS_Type_IVb	Cell Wall and Capsule	Gram-Positive cell wall components	Polyglycerolphosphate lipoteichoic acid biosynthesis
HD31_revised_scaffold955_12_gene2242	fig|1235788.3.peg.3175__323__cAMP_signaling_in_bacteria__AC__Adenylate_cyclase_(EC_4.6.1.1)	Regulation and Cell signaling	-	cAMP signaling in bacteria
HD38_revised_scaffold8600_3_gene39883	fig|1235789.3.peg.2676__873__Isoprenoid_Biosynthesis__IPDDI__Isopentenyl-diphosphate_delta-isomerase_(EC_5.3.3.2)	Fatty Acids, Lipids, and Isoprenoids	Isoprenoids	Isoprenoid Biosynthesis
HD37_revised_scaffold37008_1_gene72649	fig|1235789.3.peg.4449__586__Cobalt-zinc-cadmium_resistance__czcD__Cobalt-zinc-cadmium_resistance_protein_CzcD	Virulence	Resistance to antibiotics and toxic compounds	Cobalt-zinc-cadmium resistance
HD8_revised_scaffold113507_1_gene156336	fig|1235789.3.peg.5405__941__Maltose_and_Maltodextrin_Utilization__MalZ__Maltodextrin_glucosidase_(EC_3.2.1.20)	Carbohydrates	Di- and oligosaccharides	Maltose and Maltodextrin Utilization
HD12_revised_scaffold2669_7_gene12324	fig|1235790.3.peg.1575__310__YjeE__YjeF-N__NAD(P)H-hydrate_epimerase_(EC_5.1.99.6)_/_ADP-dependent_(S)-NAD(P)H-hydrate_dehydratase_(EC_4.2.1.136)	Cell Wall and Capsule	-	YjeE
HD12_revised_scaffold2669_7_gene12322	fig|1235790.3.peg.1577__1135__Phd-Doc,_YdcE-YdcD_toxin-antitoxin_(programmed_cell_death)_systems__YdcE__Programmed_cell_death_toxin_YdcE	Regulation and Cell signaling	Programmed Cell Death and Toxin-antitoxin Systems	Phd-Doc, YdcE-YdcD toxin-antitoxin (programmed cell death) systems
HD8_revised_scaffold9469_6_gene106171	fig|1235790.3.peg.1777__364__tRNA_aminoacylation,_Gly__Gly__Glycyl-tRNA_synthetase_(EC_6.1.1.14)	Protein Metabolism	Protein biosynthesis	tRNA aminoacylation, Gly
HD12_revised_scaffold44048_1_gene80542	fig|1235790.3.peg.216__106__Sporulation_gene_orphans__SpoVT__Stage_V_sporulation_protein_T,_AbrB_family_transcriptional_regulator_(SpoVT)	Dormancy and Sporulation	-	Sporulation gene orphans
LD85_revised_scaffold14818_2_gene103618	fig|1235790.3.peg.2814__941__Maltose_and_Maltodextrin_Utilization__maa__Maltose_O-acetyltransferase_(EC_2.3.1.79)	Carbohydrates	Di- and oligosaccharides	Maltose and Maltodextrin Utilization
LD15_revised_C1303493_1_gene9907	fig|1235790.3.peg.3060__106__Sporulation_gene_orphans__SpoVAA__Stage_V_sporulation_protein_AA_(SpoVAA)	Dormancy and Sporulation	-	Sporulation gene orphans
HD12_revised_scaffold44048_1_gene80548	fig|1235790.3.peg.3263__106__Sporulation_gene_orphans__SpoIIE__Stage_II_sporulation_serine_phosphatase_for_sigma-F_activation_(SpoIIE)	Dormancy and Sporulation	-	Sporulation gene orphans
HD5_revised_scaffold33751_4_gene41341	fig|1235790.3.peg.3347__997__Aminoglycoside_adenylyltransferases__N6-ac__Aminoglycoside_N6-acetyltransferase_(EC_2.3.1.82)	Virulence	Resistance to antibiotics and toxic compounds	Aminoglycoside adenylyltransferases
HD35_revised_scaffold60024_1_gene20416	fig|1235790.3.peg.3497__210__Transcription_initiation,_bacterial_sigma_factors__SigZ__RNA_polymerase_sigma_factor_SigZ	RNA Metabolism	Transcription	Transcription initiation, bacterial sigma factors
LD33_revised_scaffold50355_3_gene51482	fig|1235790.3.peg.3997__1211__Protocatechuate_branch_of_beta-ketoadipate_pathway__pcaC__4-carboxymuconolactone_decarboxylase_(EC_4.1.1.44)	Metabolism of Aromatic Compounds	Metabolism of central aromatic intermediates	Protocatechuate branch of beta-ketoadipate pathway
HD37_revised_scaffold187_2_gene77809	fig|1235790.3.peg.690__106__Sporulation_gene_orphans__SpoVAD__Stage_V_sporulation_protein_AD_(SpoVAD)	Dormancy and Sporulation	-	Sporulation gene orphans
HD12_revised_scaffold171_2_gene73611	fig|1235790.3.peg.91__888__L-fucose_utilization__FucO__Lactaldehyde_reductase_(EC_1.1.1.77)	Carbohydrates	Monosaccharides	L-fucose utilization
HD35_revised_scaffold20382_2_gene156934	fig|1235790.3.peg.938__570__Choline_and_Betaine_Uptake_and_Betaine_Biosynthesis__ChA__Choline_binding_protein_A	Stress Response	Osmotic stress	Choline and Betaine Uptake and Betaine Biosynthesis
HD12_revised_scaffold6399_3_gene20362	fig|1235794.3.peg.154__726__Exopolysaccharide_Biosynthesis__Glt2__Glycosyl_transferase,_group_2_family	Cell Wall and Capsule	Capsular and extracellular polysacchrides	Exopolysaccharide Biosynthesis
LD33_revised_scaffold50112_3_gene11965	fig|1235794.3.peg.2471__12__Restriction-Modification_System__RhuM__Putative_predicted_metal-dependent_hydrolase	DNA Metabolism	-	Restriction-Modification System
HD23_revised_scaffold41143_2_gene15196	fig|1235795.3.peg.1835__456__CBSS-257314.1.peg.676__FIG002490__Transcriptional_regulator_in_cluster_with_unspecified_monosaccharide_ABC_transport_system	Clustering-based subsystems	Two related proteases	CBSS-257314.1.peg.676
LD33_revised_scaffold52552_1_gene9762	fig|1235795.3.peg.1965__76__Siderophore_assembly_kit__STra__Siderophore_transport_protein	Iron acquisition and metabolism	Siderophores	Siderophore assembly kit
HD51_revised_scaffold48299_1_gene23025	fig|1235795.3.peg.2617__293__Widespread_colonization_island__TadC__Type_II/IV_secretion_system_protein_TadC,_associated_with_Flp_pilus_assembly	Membrane Transport	Protein secretion system, Type II	Widespread colonization island
LD14_revised_scaffold16017_1_gene15098	fig|1235796.3.peg.1137__473__CBSS-316057.3.peg.1308__R10__RNA_polymerase_sigma-70_factor,_ECF_subfamily	Clustering-based subsystems	Putative asociate of RNA polymerase sigma-54 factor rpoN	CBSS-316057.3.peg.1308
LD54_revised_C685614_1_gene91010	fig|1235796.3.peg.1422__402__Beta-Glucoside_Metabolism__BglB__Beta-glucosidase_(EC_3.2.1.21);_6-phospho-beta-glucosidase_(EC_3.2.1.86)	Carbohydrates	Di- and oligosaccharides	Beta-Glucoside Metabolism
HD35_revised_scaffold62300_3_gene1109	fig|1235796.3.peg.1602__769__Fructooligosaccharides(FOS)_and_Raffinose_Utilization__BG__Beta-glucosidase_(EC_3.2.1.21);_6-phospho-beta-glucosidase_(EC_3.2.1.86)	Carbohydrates	Di- and oligosaccharides	Fructooligosaccharides(FOS) and Raffinose Utilization
HD18_revised_scaffold34932_5_gene47761	fig|1235797.3.peg.1303__106__Sporulation_gene_orphans__SpoIIGA__Sporulation_sigma-E_factor_processing_peptidase_(SpoIIGA)	Dormancy and Sporulation	-	Sporulation gene orphans
HD5_revised_scaffold51604_5_gene80796	fig|1235797.3.peg.1750__27__Ribosome_LSU_bacterial__L13p__LSU_ribosomal_protein_L13p_(L13Ae)	Protein Metabolism	Protein biosynthesis	Ribosome LSU bacterial
HD8_revised_scaffold489_1_gene90494	fig|1235797.3.peg.1951__549__Cell_Division_Cluster__DivIVA__Cell_division_initiation_protein_DivIVA	Clustering-based subsystems	Cell Division	Cell Division Cluster
HD5_revised_scaffold51604_5_gene80791	fig|1235797.3.peg.2049__106__Sporulation_gene_orphans__SpoIID__Stage_II_sporulation_protein_D_(SpoIID)	Dormancy and Sporulation	-	Sporulation gene orphans
HD8_revised_scaffold9469_6_gene106172	fig|1235797.3.peg.2090__142__Synthesis_of_osmoregulated_periplasmic_glucans__CgmB__Cyclic_beta-1,2-glucan_modification_transmembrane_protein	Stress Response	Osmotic stress	Synthesis of osmoregulated periplasmic glucans
HD40_revised_scaffold22046_2_gene110716	fig|1235797.3.peg.2125__367__tRNA_aminoacylation,_Ile__Ile__Isoleucyl-tRNA_synthetase_(EC_6.1.1.5)	Protein Metabolism	Protein biosynthesis	tRNA aminoacylation, Ile
HD5_revised_scaffold18196_3_gene73347	fig|1235797.3.peg.2125__367__tRNA_aminoacylation,_Ile__Ile__Isoleucyl-tRNA_synthetase_(EC_6.1.1.5)	Protein Metabolism	Protein biosynthesis	tRNA aminoacylation, Ile
HD5_revised_scaffold7826_5_gene23094	fig|1235797.3.peg.2202__626__Cysteine_Biosynthesis__CysK__Cysteine_synthase_(EC_2.5.1.47)	Amino Acids and Derivatives	Lysine, threonine, methionine, and cysteine	Cysteine Biosynthesis
LD70_revised_scaffold27007_1_gene27740	fig|1235797.3.peg.2357__1244__Pyruvate:ferredoxin_oxidoreductase__PFOR__Pyruvate-flavodoxin_oxidoreductase_(EC_1.2.7.-)	Carbohydrates	Central carbohydrate metabolism	Pyruvate:ferredoxin oxidoreductase
HD35_revised_scaffold25505_3_gene95913	fig|1235797.3.peg.2399__611__Copper_homeostasis__2?__Heavy_metal-(Cd/Co/Hg/Pb/Zn)-translocating_P-type_ATPase:Heavy_metal_translocating_P-type_ATPase	Virulence	Resistance to antibiotics and toxic compounds	Copper homeostasis
HD40_revised_scaffold14687_2_gene151953	fig|1235797.3.peg.2566__1222__Purine_conversions__ASL__Adenylosuccinate_lyase_(EC_4.3.2.2)	Nucleosides and Nucleotides	Purines	Purine conversions
HD5_revised_scaffold3355_1_gene77045	fig|1235797.3.peg.2864__802__Glycerolipid_and_Glycerophospholipid_Metabolism_in_Bacteria__Dak__Dihydroxyacetone_kinase_family_protein	Fatty Acids, Lipids, and Isoprenoids	Phospholipids	Glycerolipid and Glycerophospholipid Metabolism in Bacteria
HD5_revised_scaffold3355_1_gene77044	fig|1235797.3.peg.2865__455__A_Gram-positive_cluster_that_relates_ribosomal_protein_L28P_to_a_set_of_uncharacterized_proteins__R2__FIG001802:_Putative_alkaline-shock_protein	Clustering-based subsystems	Ribosomal Protein L28P relates to a set of uncharacterized proteins	A Gram-positive cluster that relates ribosomal protein L28P to a set of uncharacterized proteins
HD26_revised_scaffold9975_2_gene57597	fig|1235797.3.peg.2959__402__Beta-Glucoside_Metabolism__lamA__Beta-glucanase_precursor_(EC_3.2.1.73)	Carbohydrates	Di- and oligosaccharides	Beta-Glucoside Metabolism
HD8_revised_scaffold40505_4_gene102013	fig|1235797.3.peg.3096__788__Glutamine,_Glutamate,_Aspartate_and_Asparagine_Biosynthesis__GltD__Glutamate_synthase_[NADPH]_small_chain_(EC_1.4.1.13)	Amino Acids and Derivatives	Glutamine, glutamate, aspartate, asparagine; ammonia assimilation	Glutamine, Glutamate, Aspartate and Asparagine Biosynthesis
HD18_revised_scaffold34932_5_gene47743	fig|1235797.3.peg.3530__106__Sporulation_gene_orphans__SpoIIIAA__Stage_III_sporulation_protein_AA	Dormancy and Sporulation	-	Sporulation gene orphans
HD18_revised_scaffold34932_5_gene47749	fig|1235797.3.peg.3536__106__Sporulation_gene_orphans__spoIIIG__Stage_III_sporulation_protein_AG	Dormancy and Sporulation	-	Sporulation gene orphans
HD8_revised_scaffold73402_2_gene111043	fig|1235797.3.peg.3587__652__DNA_Repair_Base_Excision__lig2__DNA_ligase_(EC_6.5.1.2)	DNA Metabolism	DNA repair	DNA Repair Base Excision
HD18_revised_scaffold34932_5_gene47756	fig|1235797.3.peg.3715__652__DNA_Repair_Base_Excision__end1__Endonuclease_III_(EC_4.2.99.18)	DNA Metabolism	DNA repair	DNA Repair Base Excision
HD54_revised_scaffold22035_1_gene9483	fig|1235797.3.peg.3748__279__V-Type_ATP_synthase__I__V-type_ATP_synthase_subunit_I_(EC_3.6.3.14)	Respiration	ATP synthases	V-Type ATP synthase
HD5_revised_scaffold45299_1_gene109040	fig|1235797.3.peg.3828__635__D-Galacturonate_and_D-Glucuronate_Utilization__KdgK__2-dehydro-3-deoxygluconate_kinase_(EC_2.7.1.45)	Carbohydrates	Monosaccharides	D-Galacturonate and D-Glucuronate Utilization
HD18_revised_scaffold48274_1_gene30037	fig|1235797.3.peg.4229__348__pVir_Plasmid_of_Campylobacter__Cjp12__DNA_topoisomerase_I_(EC_5.99.1.2)	Membrane Transport	Protein and nucleoprotein secretion system, Type IV	pVir Plasmid of Campylobacter
HD5_revised_scaffold13861_2_gene79557	fig|1235797.3.peg.84__1047__Na(+)-translocating_NADH-quinone_oxidoreductase_and_rnf-like_group_of_electron_transport_complexes__rnfE__Electron_transport_complex_protein_RnfE	Respiration	Electron donating reactions	Na(+)-translocating NADH-quinone oxidoreductase and rnf-like group of electron transport complexes
HD5_revised_scaffold13861_2_gene79558	fig|1235797.3.peg.85__1047__Na(+)-translocating_NADH-quinone_oxidoreductase_and_rnf-like_group_of_electron_transport_complexes__rnfA__Electron_transport_complex_protein_RnfA	Respiration	Electron donating reactions	Na(+)-translocating NADH-quinone oxidoreductase and rnf-like group of electron transport complexes
HD8_revised_scaffold112031_2_gene125985	fig|1235798.3.peg.2246__659__DNA_repair,_bacterial_DinG_and_relatives__YoaA__DinG_family_ATP-dependent_helicase_YoaA	DNA Metabolism	DNA repair	DNA repair, bacterial DinG and relatives
HD12_revised_scaffold44048_1_gene80558	fig|1235798.3.peg.2924__355__Bacterial_Chemotaxis__tsr__Methyl-accepting_chemotaxis_protein_I_(serine_chemoreceptor_protein)	Motility and Chemotaxis	-	Bacterial Chemotaxis
HD12_revised_scaffold44048_1_gene80523	fig|1235798.3.peg.2954__897__Lactose_and_Galactose_Uptake_and_Utilization__GalT__Galactose-1-phosphate_uridylyltransferase_(EC_2.7.7.10)	Carbohydrates	Di- and oligosaccharides	Lactose and Galactose Uptake and Utilization
HD38_revised_scaffold27969_6_gene54236	fig|1235798.3.peg.3485__558__Chitin_and_N-acetylglucosamine_utilization__ABCc__N-Acetyl-D-glucosamine_ABC_transport_system,_sugar-binding_protein	Carbohydrates	Aminosugars	Chitin and N-acetylglucosamine utilization
HV6_revised_scaffold80_7_gene78482	fig|1235798.3.peg.3489__769__Fructooligosaccharides(FOS)_and_Raffinose_Utilization__MsmR__MSM_(multiple_sugar_metabolism)_operon_regulatory_protein	Carbohydrates	Di- and oligosaccharides	Fructooligosaccharides(FOS) and Raffinose Utilization
HD35_revised_scaffold73779_4_gene126917	fig|1235798.3.peg.3601__494__CBSS-393121.3.peg.2760__R3__Cell_division_protein_FtsX	Clustering-based subsystems	Protein export?	CBSS-393121.3.peg.2760
HD12_revised_scaffold4068_9_gene11215	fig|1235798.3.peg.3732__301__Xylose_utilization__XynA__Endo-1,4-beta-xylanase_A_precursor_(EC_3.2.1.8)	Carbohydrates	Monosaccharides	Xylose utilization
LD62_revised_scaffold24497_1_gene40001	fig|1235798.3.peg.3770__896__Lacto-N-Biose_I_and_Galacto-N-Biose_Metabolic_Pathway__LnpB__N-acetylhexosamine_1-kinase	Carbohydrates	-	Lacto-N-Biose I and Galacto-N-Biose Metabolic Pathway
LD61_revised_scaffold11993_1_gene67179	fig|1235801.4.peg.1662__570__Choline_and_Betaine_Uptake_and_Betaine_Biosynthesis__ChA__Choline_binding_protein_A	Stress Response	Osmotic stress	Choline and Betaine Uptake and Betaine Biosynthesis
HD1_revised_scaffold42030_1_gene52130	fig|1235801.4.peg.30__494__CBSS-393121.3.peg.2760__R6__Cell_division_transporter,_ATP-binding_protein_FtsE_(TC_3.A.5.1.1)	Clustering-based subsystems	Protein export?	CBSS-393121.3.peg.2760
HD38_revised_scaffold22167_6_gene46764	fig|1235802.3.peg.1250__752__Flagellum__fliD__Flagellar_hook-associated_protein_FliD	Motility and Chemotaxis	Flagellar motility in Prokaryota	Flagellum
HD1_revised_scaffold42047_1_gene51061	fig|1235802.3.peg.1890__301__Xylose_utilization__aX_ABCb__Possible_alpha-xyloside_ABC_transporter,_permease_component	Carbohydrates	Monosaccharides	Xylose utilization
HD1_revised_scaffold42030_1_gene52030	fig|1235802.3.peg.2263__155__Teichoic_and_lipoteichoic_acids_biosynthesis__PPRT__Putative_polyribitolphosphotransferase	Cell Wall and Capsule	Gram-Positive cell wall components	Teichoic and lipoteichoic acids biosynthesis
LD41_revised_scaffold52343_2_gene33086	fig|1235802.3.peg.2336__355__Bacterial_Chemotaxis__rbsB__Ribose_ABC_transporter,_periplasmic_ribose-binding_protein_RbsB_(TC_3.A.1.2.1)	Motility and Chemotaxis	-	Bacterial Chemotaxis
HD1_revised_scaffold42047_1_gene50955	fig|1235802.3.peg.2383__210__Transcription_initiation,_bacterial_sigma_factors__RpoN__RNA_polymerase_sigma-54_factor_RpoN	RNA Metabolism	Transcription	Transcription initiation, bacterial sigma factors
HD12_revised_scaffold4068_3_gene58547	fig|1235802.3.peg.3238__800__Glycerol_and_Glycerol-3-phosphate_Uptake_and_Utilization__UdpQ__Glycerophosphoryl_diester_phosphodiesterase_(EC_3.1.4.46)	Carbohydrates	Sugar alcohols	Glycerol and Glycerol-3-phosphate Uptake and Utilization
HD26_revised_scaffold23400_1_gene69115	fig|1235802.3.peg.3854__1222__Purine_conversions__23PDE__2,3-cyclic-nucleotide_2-phosphodiesterase_(EC_3.1.4.16)	Nucleosides and Nucleotides	Purines	Purine conversions
HD12_revised_scaffold171_5_gene35971	fig|1235802.3.peg.3854__1222__Purine_conversions__23PDE__2,3-cyclic-nucleotide_2-phosphodiesterase_(EC_3.1.4.16)	Nucleosides and Nucleotides	Purines	Purine conversions
HD12_revised_scaffold6399_3_gene20357	fig|1235802.3.peg.3854__1222__Purine_conversions__23PDE__2,3-cyclic-nucleotide_2-phosphodiesterase_(EC_3.1.4.16)	Nucleosides and Nucleotides	Purines	Purine conversions
HD35_revised_scaffold42800_3_gene158640	fig|1235802.3.peg.4389__106__Sporulation_gene_orphans__SpoVAE__Stage_V_sporulation_protein_AE_(SpoVAE)	Dormancy and Sporulation	-	Sporulation gene orphans
HD19_revised_scaffold6227_1_gene42169	fig|1235802.3.peg.4618__238__Two-component_regulatory_systems_in_Campylobacter__RR__Two-component_system_response_regulator	Regulation and Cell signaling	-	Two-component regulatory systems in Campylobacter
LD85_revised_scaffold17841_2_gene33425	fig|1235802.3.peg.4618__238__Two-component_regulatory_systems_in_Campylobacter__RR__Two-component_system_response_regulator	Regulation and Cell signaling	-	Two-component regulatory systems in Campylobacter
LD64_revised_C642912_1_gene33606	fig|1235802.3.peg.4618__238__Two-component_regulatory_systems_in_Campylobacter__RR__Two-component_system_response_regulator	Regulation and Cell signaling	-	Two-component regulatory systems in Campylobacter
LD33_revised_scaffold1278_1_gene14122	fig|1235802.3.peg.4618__238__Two-component_regulatory_systems_in_Campylobacter__RR__Two-component_system_response_regulator	Regulation and Cell signaling	-	Two-component regulatory systems in Campylobacter
LD38_revised_scaffold30657_1_gene6748	fig|1235802.3.peg.4618__238__Two-component_regulatory_systems_in_Campylobacter__RR__Two-component_system_response_regulator	Regulation and Cell signaling	-	Two-component regulatory systems in Campylobacter
LD33_revised_scaffold50778_1_gene38270	fig|1235802.3.peg.4675__769__Fructooligosaccharides(FOS)_and_Raffinose_Utilization__BG__Beta-glucosidase_(EC_3.2.1.21)	Carbohydrates	Di- and oligosaccharides	Fructooligosaccharides(FOS) and Raffinose Utilization
LD33_revised_scaffold8140_1_gene38567	fig|1235802.3.peg.580__769__Fructooligosaccharides(FOS)_and_Raffinose_Utilization__MsmE__Multiple_sugar_ABC_transporter,_substrate-binding_protein	Carbohydrates	Di- and oligosaccharides	Fructooligosaccharides(FOS) and Raffinose Utilization
HD12_revised_scaffold6794_1_gene51496	fig|1235802.3.peg.650__368__tRNA_aminoacylation,_Leu__Leu__Leucyl-tRNA_synthetase_(EC_6.1.1.4)	Protein Metabolism	Protein biosynthesis	tRNA aminoacylation, Leu
HD8_revised_scaffold81787_1_gene185139	fig|1235802.3.peg.7__522__CRISPR-associated_cluster__F1__DUF324_domain-containing_protein	DNA Metabolism	CRISPs	CRISPR-associated cluster
HD40_revised_scaffold82820_3_gene174872	fig|1235802.3.peg.939__769__Fructooligosaccharides(FOS)_and_Raffinose_Utilization__MsmR__MSM_(multiple_sugar_metabolism)_operon_regulatory_protein	Carbohydrates	Di- and oligosaccharides	Fructooligosaccharides(FOS) and Raffinose Utilization
HD37_revised_scaffold51479_1_gene79223	fig|1235803.3.peg.4017__788__Glutamine,_Glutamate,_Aspartate_and_Asparagine_Biosynthesis__AsnA__Aspartate--ammonia_ligase_(EC_6.3.1.1)	Amino Acids and Derivatives	Glutamine, glutamate, aspartate, asparagine; ammonia assimilation	Glutamine, Glutamate, Aspartate and Asparagine Biosynthesis
LD21_revised_C328449_1_gene41708	fig|1235803.3.peg.4594__779__Galactosylceramide_and_Sulfatide_metabolism__pbDG__probable_beta-D-galactosidase	Sulfur Metabolism	-	Galactosylceramide and Sulfatide metabolism
HD8_revised_scaffold9469_6_gene106174	fig|1235835.3.peg.1137__528__Calvin-Benson_cycle__TK_C__Transketolase,_C-terminal_section_(EC_2.2.1.1)	Carbohydrates	CO2 fixation	Calvin-Benson cycle
HD8_revised_scaffold112565_1_gene136505	fig|1235835.3.peg.1298__98__Spore_germination__GerKA__Spore_germination_protein_GerKA	Dormancy and Sporulation	-	Spore germination
HD1_revised_scaffold42047_1_gene50940	fig|1235835.3.peg.1527__310__YjeE__YjeF-N__NAD(P)H-hydrate_epimerase_(EC_5.1.99.6)_/_ADP-dependent_(S)-NAD(P)H-hydrate_dehydratase_(EC_4.2.1.136)	Cell Wall and Capsule	-	YjeE
HD8_revised_scaffold104140_2_gene112336	fig|1235835.3.peg.1553__23__Ribosomal_protein_S12p_Asp_methylthiotransferase__mS-Asp__Ribosomal_protein_S12p_Asp88_(E._coli)_methylthiotransferase	Protein Metabolism	Protein processing and modification	Ribosomal protein S12p Asp methylthiotransferase
HD8_revised_scaffold20479_1_gene47824	fig|1235835.3.peg.1897__457__CBSS-258594.1.peg.3339__R3__Glycosyltransferase	Clustering-based subsystems	Biosynthesis of galactoglycans and related lipopolysacharides	CBSS-258594.1.peg.3339
HD8_revised_scaffold9469_6_gene106151	fig|1235835.3.peg.1966__1102__Peptidoglycan_Biosynthesis__ddl__D-alanine--D-alanine_ligase_(EC_6.3.2.4)	Cell Wall and Capsule	-	Peptidoglycan Biosynthesis
HD1_revised_scaffold42047_1_gene51049	fig|1235835.3.peg.1972__387__tRNA-dependent_amino_acid_transfers__generic__tRNA-dependent_lipid_II--amino_acid_ligase	Cell Wall and Capsule	-	tRNA-dependent amino acid transfers
HD8_revised_scaffold30466_2_gene46296	fig|1235835.3.peg.2189__530__Campylobacter_Iron_Metabolism__CorA__Magnesium_and_cobalt_transport_protein_CorA	Iron acquisition and metabolism	-	Campylobacter Iron Metabolism
HD16_revised_scaffold11112_2_gene113774	fig|1235835.3.peg.2410__279__V-Type_ATP_synthase__K__V-type_ATP_synthase_subunit_K_(EC_3.6.3.14)	Respiration	ATP synthases	V-Type ATP synthase
HD1_revised_scaffold42030_1_gene52043	fig|1235835.3.peg.2413__279__V-Type_ATP_synthase__C__V-type_ATP_synthase_subunit_C_(EC_3.6.3.14)	Respiration	ATP synthases	V-Type ATP synthase
HD8_revised_scaffold9469_6_gene106158	fig|1235835.3.peg.2898__363__tRNA_aminoacylation,_Glu_and_Gln__Glu-tRNA(Gln)__Glutamyl-tRNA_synthetase_(EC_6.1.1.17)_@_Glutamyl-tRNA(Gln)_synthetase_(EC_6.1.1.24)	Protein Metabolism	Protein biosynthesis	tRNA aminoacylation, Glu and Gln
HD8_revised_scaffold9469_6_gene106181	fig|1235835.3.peg.30__190__Threonine_and_Homoserine_Biosynthesis__ThrA__Aspartokinase_(EC_2.7.2.4)	Amino Acids and Derivatives	Lysine, threonine, methionine, and cysteine	Threonine and Homoserine Biosynthesis
HD5_revised_scaffold52090_2_gene102629	fig|1235835.3.peg.3080__550__Cell_Division_Subsystem_including_YidCD__polIII-beta__DNA_polymerase_III_beta_subunit_(EC_2.7.7.7)	Clustering-based subsystems	Cell Division	Cell Division Subsystem including YidCD
HD1_revised_scaffold42030_1_gene52089	fig|1235835.3.peg.3133__27__Ribosome_LSU_bacterial__L24p__LSU_ribosomal_protein_L24p_(L26e)	Protein Metabolism	Protein biosynthesis	Ribosome LSU bacterial
HD8_revised_scaffold22676_4_gene92488	fig|1235835.3.peg.3208__1102__Peptidoglycan_Biosynthesis__PBP-2__Penicillin-binding_protein_2_(PBP-2)	Cell Wall and Capsule	-	Peptidoglycan Biosynthesis
LV11_revised_C616729_1_gene47037	fig|1235835.3.peg.746__460__CBSS-262719.3.peg.410__R1__Phosphoesterase,_DHH_family_protein	Clustering-based subsystems	-	CBSS-262719.3.peg.410
LD38_revised_scaffold37124_1_gene21148	fig|1236905.3.peg.845__751__Flagellar_motility__CheY__Chemotaxis_regulator_-_transmits_chemoreceptor_signals_to_flagelllar_motor_components_CheY	Motility and Chemotaxis	Flagellar motility in Prokaryota	Flagellar motility
LD33_revised_scaffold52089_1_gene60506	fig|1238184.3.peg.2868__712__ESAT-6_proteins_secretion_system_in_Firmicutes__EsaA__Putative_secretion_accessory_protein_EsaA/YueB	Membrane Transport	Protein secretion system, Type VII	ESAT-6 proteins secretion system in Firmicutes
LD38_revised_scaffold31010_1_gene91906	fig|1238184.3.peg.2868__712__ESAT-6_proteins_secretion_system_in_Firmicutes__EsaA__Putative_secretion_accessory_protein_EsaA/YueB	Membrane Transport	Protein secretion system, Type VII	ESAT-6 proteins secretion system in Firmicutes
HD1_revised_scaffold42030_1_gene52127	fig|1239783.3.peg.3167__886__L-Cystine_Uptake_and_Metabolism__TcyA__L-Cystine_ABC_transporter,_periplasmic_cystine-binding_protein_TcyA	Sulfur Metabolism	Organic sulfur assimilation	L-Cystine Uptake and Metabolism
LD7_revised_C958298_1_gene7930	fig|1239783.3.peg.8205__995__Murein_Hydrolases__DacD__D-alanyl-D-alanine_carboxypeptidase_(EC_3.4.16.4)	Cell Wall and Capsule	-	Murein Hydrolases
HD8_revised_scaffold62413_1_gene153379	fig|1239786.3.peg.1278__1133__Phage_tail_proteins_2__TMP__Phage_tail_length_tape-measure_protein	Phages, Prophages, Transposable elements, Plasmids	Phages, Prophages	Phage tail proteins 2
LD30_revised_scaffold36108_1_gene72450	fig|1239792.3.peg.1809__941__Maltose_and_Maltodextrin_Utilization__maa__Maltose_O-acetyltransferase_(EC_2.3.1.79)	Carbohydrates	Di- and oligosaccharides	Maltose and Maltodextrin Utilization
LD33_revised_scaffold40866_2_gene49093	fig|1242864.3.peg.1312__788__Glutamine,_Glutamate,_Aspartate_and_Asparagine_Biosynthesis__AspC__Aspartate_aminotransferase_(EC_2.6.1.1)	Amino Acids and Derivatives	Glutamine, glutamate, aspartate, asparagine; ammonia assimilation	Glutamine, Glutamate, Aspartate and Asparagine Biosynthesis
LD45_revised_scaffold27496_1_gene11806	fig|1242864.3.peg.880__941__Maltose_and_Maltodextrin_Utilization__Mlc__Mlc,_transcriptional_repressor_of_MalT_(the_transcriptional_activator_of_maltose_regulon)_and_manXYZ_operon	Carbohydrates	Di- and oligosaccharides	Maltose and Maltodextrin Utilization
HD1_revised_scaffold42030_1_gene52136	fig|1243664.3.peg.2652__551__ABC_transporter_oligopeptide_(TC_3.A.1.5.1)__oppD__Oligopeptide_transport_ATP-binding_protein_OppD_(TC_3.A.1.5.1)	Membrane Transport	ABC transporters	ABC transporter oligopeptide (TC 3.A.1.5.1)
HD8_revised_scaffold106244_1_gene137467	fig|1245471.3.peg.1734__390__Bacterial_hemoglobins__1_Cl2__diguanylate_cyclase/phosphodiesterase_(GGDEF_&_EAL_domains)_with_PAS/PAC_sensor(s)	Stress Response	-	Bacterial hemoglobins
LD33_revised_scaffold52329_3_gene1651	fig|1245473.3.peg.3007__647__D-ribose_utilization__RbsR__Ribose_operon_repressor	Carbohydrates	Monosaccharides	D-ribose utilization
HD37_revised_scaffold49929_2_gene13300	fig|1245476.3.peg.3757__795__Glutathione:_Non-redox_reactions__GloA__Lactoylglutathione_lyase_(EC_4.4.1.5)	Stress Response	Oxidative stress	Glutathione: Non-redox reactions
LD61_revised_scaffold18451_11_gene20743	fig|1245476.3.peg.525__664__DNA_repair,_bacterial_RecFOR_pathway__RecF__DNA_recombination_and_repair_protein_RecF	DNA Metabolism	DNA repair	DNA repair, bacterial RecFOR pathway
LD33_revised_scaffold51453_7_gene27501	fig|1246475.3.peg.4863__1272__RNA_processing_and_degradation,_bacterial__RNaseG__Cytoplasmic_axial_filament_protein_CafA_and_Ribonuclease_G_(EC_3.1.4.-)	RNA Metabolism	RNA processing and modification	RNA processing and degradation, bacterial
HD6_revised_scaffold69936_1_gene86175	fig|1246477.3.peg.4846__379__tRNA_modification_Archaea__rimO__tRNA-i(6)A37_methylthiotransferase	RNA Metabolism	RNA processing and modification	tRNA modification Archaea
HD8_revised_scaffold101564_1_gene185251	fig|1248440.3.peg.4838__556__Cellulosome__SusD__SusD,_outer_membrane_protein	Carbohydrates	Polysaccharides	Cellulosome
LD45_revised_scaffold27771_1_gene10702	fig|1249481.3.peg.24__837__High_affinity_phosphate_transporter_and_control_of_PHO_regulon__PstB__Phosphate_transport_ATP-binding_protein_PstB_(TC_3.A.1.7.1)	Phosphorus Metabolism	-	High affinity phosphate transporter and control of PHO regulon
LD33_revised_scaffold7798_1_gene51619	fig|1249481.3.peg.990__552__Cell_division_cluster_containing_FtsZ_and_FtsW__COG1496__COG1496:_Uncharacterized_conserved_protein	Clustering-based subsystems	Cell Division	Cell division cluster containing FtsZ and FtsW
LD33_revised_scaffold50776_1_gene53737	fig|1254439.12.peg.1592__941__Maltose_and_Maltodextrin_Utilization__MalZ__Maltodextrin_glucosidase_(EC_3.2.1.20)	Carbohydrates	Di- and oligosaccharides	Maltose and Maltodextrin Utilization
LD45_revised_scaffold4746_2_gene19649	fig|1254439.12.peg.335__164__Terminal_cytochrome_d_ubiquinol_oxidases__CydCD__Transport_ATP-binding_protein_CydCD	Respiration	Electron accepting reactions	Terminal cytochrome d ubiquinol oxidases
HD26_revised_scaffold9975_2_gene57574	fig|1256205.3.peg.1245__749__Fermentations:_Mixed_acid__ADH__Alcohol_dehydrogenase_(EC_1.1.1.1)	Carbohydrates	Fermentation	Fermentations: Mixed acid
HD35_revised_scaffold34139_5_gene4253	fig|1256205.3.peg.1245__749__Fermentations:_Mixed_acid__ADH__Alcohol_dehydrogenase_(EC_1.1.1.1)	Carbohydrates	Fermentation	Fermentations: Mixed acid
HD38_revised_scaffold29682_3_gene15855	fig|1260626.4.peg.4996__214__Translation_initiation_factors_bacterial__IF-2__Translation_initiation_factor_2	Protein Metabolism	Protein biosynthesis	Translation initiation factors bacterial
HD37_revised_scaffold6874_1_gene32746	fig|1261621.3.peg.2594__1221__Purine_Utilization__XT_5__Xanthine_transporter,putative	Nucleosides and Nucleotides	Purines	Purine Utilization
LD33_revised_scaffold52331_1_gene33906	fig|1262454.3.peg.1687__492__CBSS-354.1.peg.2917__R6__Rod_shape-determining_protein_MreC	Clustering-based subsystems	TldD cluster	CBSS-354.1.peg.2917
LD85_revised_scaffold53901_2_gene63649	fig|1262663.10.peg.3729__581__Cluster-based_Subsystem_Grouping_Hypotheticals_-_perhaps_Proteosome_Related__FIG005666__FIG005666:_putative_helicase	Clustering-based subsystems	proteosome related	Cluster-based Subsystem Grouping Hypotheticals - perhaps Proteosome Related
HD6_revised_scaffold69936_1_gene86174	fig|1262663.10.peg.5175__72__Siderophore_Pyoverdine__PvdX__Hypothetical_protein_PvdX	Iron acquisition and metabolism	Siderophores	Siderophore Pyoverdine
HD37_revised_scaffold51314_2_gene14475	fig|1263867.3.peg.3080__301__Xylose_utilization__XynA__Endo-1,4-beta-xylanase_A_precursor_(EC_3.2.1.8)	Carbohydrates	Monosaccharides	Xylose utilization
HD16_revised_scaffold36537_2_gene44988	fig|1265309.4.peg.824__1192__Proline,_4-hydroxyproline_uptake_and_utilization__PutR__PutR,_transcriptional_activator_of_PutA_and_PutP	Amino Acids and Derivatives	Proline and 4-hydroxyproline	Proline, 4-hydroxyproline uptake and utilization
LD45_revised_scaffold559_6_gene28512	fig|1265502.3.peg.1257__1056__Nitrate_and_nitrite_ammonification__NaNiRR__Nitrate/nitrite_response_regulator_protein	Nitrogen Metabolism	-	Nitrate and nitrite ammonification
HD35_revised_scaffold54846_2_gene74745	fig|1265507.3.peg.2377__837__High_affinity_phosphate_transporter_and_control_of_PHO_regulon__PhoR__Phosphate_regulon_sensor_protein_PhoR_(SphS)_(EC_2.7.13.3)	Phosphorus Metabolism	-	High affinity phosphate transporter and control of PHO regulon
HD8_revised_scaffold92774_2_gene115009	fig|1265738.3.peg.6918__779__Galactosylceramide_and_Sulfatide_metabolism__bGS__Beta-galactosidase_(EC_3.2.1.23)	Sulfur Metabolism	-	Galactosylceramide and Sulfatide metabolism
LD33_revised_scaffold47584_5_gene11158	fig|1266066.3.peg.1706__117__Streptococcal_Mga_Regulon__ScpA__C5a_peptidase_(EC_3.4.21.-)	Regulation and Cell signaling	Regulation of virulence	Streptococcal Mga Regulon
LD33_revised_scaffold51322_1_gene42782	fig|1266716.3.peg.1465__941__Maltose_and_Maltodextrin_Utilization__MalR__Maltose_operon_transcriptional_repressor_MalR,_LacI_family	Carbohydrates	Di- and oligosaccharides	Maltose and Maltodextrin Utilization
LD85_revised_scaffold13279_3_gene57002	fig|1266716.3.peg.1559__1222__Purine_conversions__NPP__Alkaline_phosphodiesterase_I_(EC_3.1.4.1)_/_Nucleotide_pyrophosphatase_(EC_3.6.1.9)	Nucleosides and Nucleotides	Purines	Purine conversions
LD33_revised_C837904_1_gene44218	fig|1266716.3.peg.1794__740__Fatty_Acid_Biosynthesis_FASII__FabG__3-oxoacyl-[acyl-carrier_protein]_reductase_(EC_1.1.1.100)	Fatty Acids, Lipids, and Isoprenoids	Fatty acids	Fatty Acid Biosynthesis FASII
LD38_revised_scaffold4735_1_gene51506	fig|1266716.3.peg.1933__621__Cyanate_hydrolysis__CynT__Carbonic_anhydrase_(EC_4.2.1.1)	Nitrogen Metabolism	-	Cyanate hydrolysis
LD85_revised_scaffold9961_2_gene29820	fig|1266716.3.peg.395__301__Xylose_utilization__XylS__Alpha-xylosidase_(EC_3.2.1.-)	Carbohydrates	Monosaccharides	Xylose utilization
LD33_revised_scaffold51027_1_gene7779	fig|1266716.3.peg.436__66__Sialic_Acid_Metabolism__AGE__N-acylglucosamine_2-epimerase_(EC_5.1.3.8)	Cell Wall and Capsule	Capsular and extracellular polysacchrides	Sialic Acid Metabolism
LD45_revised_scaffold4375_9_gene21427	fig|1266716.3.peg.591__558__Chitin_and_N-acetylglucosamine_utilization__NagC__N-acetylglucosamine-6P-responsive_transcriptional_repressor_NagC,_ROK_family	Carbohydrates	Aminosugars	Chitin and N-acetylglucosamine utilization
LD33_revised_scaffold13425_4_gene57955	fig|1266716.3.peg.819__558__Chitin_and_N-acetylglucosamine_utilization__ABCc__N-Acetyl-D-glucosamine_ABC_transport_system,_sugar-binding_protein	Carbohydrates	Aminosugars	Chitin and N-acetylglucosamine utilization
LD33_revised_scaffold51212_2_gene54881	fig|1266716.3.peg.862__120__Streptococcus_pneumoniae_Vancomycin_Tolerance_Locus__vex2__ABC_transporter,_ATP-binding_protein_Vex2	Virulence	Resistance to antibiotics and toxic compounds	Streptococcus pneumoniae Vancomycin Tolerance Locus
HD8_revised_scaffold9469_6_gene106156	fig|1267004.3.peg.2938__1040__N-Acetyl-Galactosamine_and_Galactosamine_Utilization__AgaM__Beta-phosphoglucomutase_(EC_5.4.2.6)	Carbohydrates	Aminosugars	N-Acetyl-Galactosamine and Galactosamine Utilization
HD16_revised_scaffold55316_1_gene5156	fig|126740.4.peg.1548__890__L-rhamnose_utilization__RGA__rhamnogalacturonan_acetylesterase	Carbohydrates	Monosaccharides	L-rhamnose utilization
HD38_revised_scaffold5953_3_gene30539	fig|126740.4.peg.1767__890__L-rhamnose_utilization__TM1061__Putative_unsaturated_glucuronyl_hydrolase	Carbohydrates	Monosaccharides	L-rhamnose utilization
HD1_revised_scaffold42030_1_gene52075	fig|126740.4.peg.631__134__Sugar_utilization_in_Thermotogales__cel74__Extracellular_endo-1,4-glucanase	Carbohydrates	-	Sugar utilization in Thermotogales
LD33_revised_scaffold52329_2_gene55082	fig|126740.4.peg.673__134__Sugar_utilization_in_Thermotogales__TM0280__Putative_glycosyl_hydrolase_of_unknown_function_(DUF1680)	Carbohydrates	-	Sugar utilization in Thermotogales
LD38_revised_scaffold31854_2_gene8042	fig|1273125.3.peg.3053__424__Branched-Chain_Amino_Acid_Biosynthesis__Lrp__Leucine-responsive_regulatory_protein,_regulator_for_leucine_(or_lrp)_regulon_and_high-affinity_branched-chain_amino_acid_transport_system	Amino Acids and Derivatives	Branched-chain amino acids	Branched-Chain Amino Acid Biosynthesis
LD45_revised_scaffold15584_2_gene58251	fig|1274524.3.peg.4128__897__Lactose_and_Galactose_Uptake_and_Utilization__GalR__Galactose_operon_repressor,_GalR-LacI_family_of_transcriptional_regulators	Carbohydrates	Di- and oligosaccharides	Lactose and Galactose Uptake and Utilization
HD12_revised_scaffold14789_1_gene19721	fig|1276647.3.peg.885__726__Exopolysaccharide_Biosynthesis__Glt2__Glycosyl_transferase,_group_2_family_protein	Cell Wall and Capsule	Capsular and extracellular polysacchrides	Exopolysaccharide Biosynthesis
HD1_revised_scaffold26777_1_gene47499	fig|1278077.4.peg.5456__214__Translation_initiation_factors_bacterial__IF-2__Translation_initiation_factor_2	Protein Metabolism	Protein biosynthesis	Translation initiation factors bacterial
LD41_revised_scaffold8767_2_gene61172	fig|1282664.3.peg.636__120__Streptococcus_pneumoniae_Vancomycin_Tolerance_Locus__vex3__ABC_transporter_membrane-spanning_permease,_Pep_export,_Vex3	Virulence	Resistance to antibiotics and toxic compounds	Streptococcus pneumoniae Vancomycin Tolerance Locus
LD33_revised_scaffold52415_1_gene28243	fig|1284240.4.peg.4687__918__Lipoprotein_sorting_system__LolD__Lipoprotein_releasing_system_ATP-binding_protein_LolD	Cell Wall and Capsule	Gram-Negative cell wall components	Lipoprotein sorting system
LD45_revised_scaffold16406_1_gene33511	fig|1284663.3.peg.2343__1133__Phage_tail_proteins_2__TMP__Phage_tail_length_tape-measure_protein	Phages, Prophages, Transposable elements, Plasmids	Phages, Prophages	Phage tail proteins 2
HD38_revised_scaffold9998_1_gene69766	fig|1284664.3.peg.716__1086__Oxidative_stress__Osmcl__Organic_hydroperoxide_resistance_transcriptional_regulator	Stress Response	Oxidative stress	Oxidative stress
HD66_revised_scaffold38661_1_gene39807	fig|1285586.5.peg.666__1100__Peptide_methionine_sulfoxide_reductase__R__Two-component_response_regulator_yesN,_associated_with_MetSO_reductase	Protein Metabolism	Protein processing and modification	Peptide methionine sulfoxide reductase
LD85_revised_scaffold39348_1_gene90049	fig|1286151.3.peg.2757__63__Serine-glyoxylate_cycle__GDSL__GDSL-like_lipase/acylhydrolase	Carbohydrates	One-carbon Metabolism	Serine-glyoxylate cycle
HD1_revised_scaffold18464_1_gene60111	fig|1286635.3.peg.652__1060__Anaerobic_respiratory_reductases__HDRd__CoB--CoM_heterodisulfide_reductase_2_iron-sulfur_subunit_D_(EC_1.8.98.1)	Respiration	Electron accepting reactions	Anaerobic respiratory reductases
HD38_revised_scaffold4126_2_gene51319	fig|1287887.3.peg.69__1280__RecA_and_RecX__RecX__Regulatory_protein_RecX	DNA Metabolism	DNA repair	RecA and RecX
LD61_revised_scaffold20311_2_gene42374	fig|1288484.3.peg.1764__12__Restriction-Modification_System__HsdR__Type_I_restriction-modification_system,_restriction_subunit_R_(EC_3.1.21.3)	DNA Metabolism	-	Restriction-Modification System
LD38_revised_scaffold40440_1_gene49143	fig|1288971.3.peg.252__800__Glycerol_and_Glycerol-3-phosphate_Uptake_and_Utilization__pGTP__Probable_glycerol_transport_protein	Carbohydrates	Sugar alcohols	Glycerol and Glycerol-3-phosphate Uptake and Utilization
LD33_revised_scaffold49375_2_gene34191	fig|1288971.3.peg.3672__750__Ferrous_iron_transporter_EfeUOB,_low-pH-induced__EfeU__Ferrous_iron_transport_permease_EfeU	Iron acquisition and metabolism	-	Ferrous iron transporter EfeUOB, low-pH-induced
HD65_revised_scaffold18278_1_gene25484	fig|1288971.3.peg.3902__104__Sporulation_Cluster_III_A__AA__Stage_III_sporulation_protein_AA	Dormancy and Sporulation	-	Sporulation Cluster III A
HD18_revised_scaffold25592_2_gene15280	fig|1288971.3.peg.5899__996__Murein_hydrolase_regulation_and_cell_death__lytS__Autolysis_histidine_kinase_LytS	Regulation and Cell signaling	Programmed Cell Death and Toxin-antitoxin Systems	Murein hydrolase regulation and cell death
LD78_revised_scaffold32398_1_gene93599	fig|1288971.3.peg.6824__1143__Phosphate_metabolism__AP__Alkaline_phosphatase_(EC_3.1.3.1)	Phosphorus Metabolism	-	Phosphate metabolism
LD33_revised_C837904_1_gene44219	fig|1292022.3.peg.636__676__De_Novo_Pyrimidine_Synthesis__uraA__Uracil_permease	Nucleosides and Nucleotides	Pyrimidines	De Novo Pyrimidine Synthesis
HD16_revised_C693878_1_gene95478	fig|1292032.3.peg.6695__652__DNA_Repair_Base_Excision__gly4__DNA-3-methyladenine_glycosylase_II_(EC_3.2.2.21)	DNA Metabolism	DNA repair	DNA Repair Base Excision
LD33_revised_C835830_1_gene52872	fig|1292037.4.peg.3834__1110__Periplasmic-Binding-Protein-Dependent_Transport_System_for_&*945;-Glucosides__AglF__ABC_alpha-glucoside_transporter,_inner_membrane_subunit_AglF	Membrane Transport	ABC transporters	Periplasmic-Binding-Protein-Dependent Transport System for &*945;-Glucosides
LD44_revised_scaffold54013_1_gene125794	fig|1292048.3.peg.156__914__Lipopolysaccharide_assembly__YaeT__Outer_membrane_protein_assembly_factor_YaeT_precursor	Cell Wall and Capsule	Gram-Negative cell wall components	Lipopolysaccharide assembly
LD85_revised_scaffold30139_2_gene105220	fig|1295141.3.peg.5840__248__Type_VI_secretion_systems__PpkA__Serine/threonine_protein_kinase_(EC_2.7.11.1)_PpkA	Membrane Transport	Protein secretion system, Type VI	Type VI secretion systems
LD38_revised_scaffold45715_3_gene4247	fig|1297534.3.peg.426__570__Choline_and_Betaine_Uptake_and_Betaine_Biosynthesis__ChA__Choline_binding_protein_A	Stress Response	Osmotic stress	Choline and Betaine Uptake and Betaine Biosynthesis
HD1_revised_scaffold42047_1_gene50921	fig|1297742.3.peg.1229__921__Listeria_surface_proteins:_Internalin-like_proteins__Inl__internalin,_putative	Virulence, Disease and Defense	Invasion and intracellular resistance	Listeria surface proteins: Internalin-like proteins
HD18_revised_scaffold12126_2_gene29234	fig|1297742.3.peg.1738__1272__RNA_processing_and_degradation,_bacterial__RNaseE__Ribonuclease_E_(EC_3.1.26.12)	RNA Metabolism	RNA processing and modification	RNA processing and degradation, bacterial
LD63_revised_scaffold14279_3_gene36436	fig|1297867.3.peg.4001__1129__Phage_packaging_machinery__Port1__Phage_portal_protein	Phages, Prophages, Transposable elements, Plasmids	Phages, Prophages	Phage packaging machinery
HD18_revised_scaffold1221_2_gene73072	fig|1298593.3.peg.278__908__Lipid_A_modifications__YijP__UPF0141_membrane_protein_YijP_possibly_required_for_phosphoethanolamine_modification_of_lipopolysaccharide	Cell Wall and Capsule	Gram-Negative cell wall components	Lipid A modifications
LD14_revised_scaffold680_2_gene92322	fig|1298924.3.peg.650__692__Dissimilatory_nitrite_reductase__NirE__Uroporphyrinogen-III_methyltransferase_(EC_2.1.1.107)	Nitrogen Metabolism	-	Dissimilatory nitrite reductase
LD85_revised_scaffold24083_2_gene70274	fig|1298925.3.peg.1200__226__Triacylglycerol_metabolism__LPLec__Lysophospholipase_(EC_3.1.1.5)	Fatty Acids, Lipids, and Isoprenoids	Triacylglycerols	Triacylglycerol metabolism
LD33_revised_scaffold26230_3_gene10611	fig|1300222.3.peg.1062__886__L-Cystine_Uptake_and_Metabolism__TcyL__L-Cystine_ABC_transporter,_permease_protein_TcyL	Sulfur Metabolism	Organic sulfur assimilation	L-Cystine Uptake and Metabolism
LD45_revised_scaffold16406_1_gene33522	fig|130478.1.peg.39__1125__Phage_head_and_packaging__TerL.3cos__Phage_terminase,_large_subunit_(3-extended_COS_ends)	Phages, Prophages, Transposable elements, Plasmids	Phages, Prophages	Phage head and packaging
LD33_revised_scaffold51057_3_gene1230	fig|1306409.3.peg.1205__570__Choline_and_Betaine_Uptake_and_Betaine_Biosynthesis__ChA__Choline_binding_protein_A	Stress Response	Osmotic stress	Choline and Betaine Uptake and Betaine Biosynthesis
HD35_revised_scaffold54846_2_gene74746	fig|1306409.3.peg.2312__390__Bacterial_hemoglobins__1_Cl2__diguanylate_cyclase/phosphodiesterase_(GGDEF_&_EAL_domains)_with_PAS/PAC_sensor(s)	Stress Response	-	Bacterial hemoglobins
HD8_revised_scaffold41604_3_gene109685	fig|1306409.3.peg.618__570__Choline_and_Betaine_Uptake_and_Betaine_Biosynthesis__ChA__Choline_binding_protein_A	Stress Response	Osmotic stress	Choline and Betaine Uptake and Betaine Biosynthesis
LD3_revised_scaffold25942_1_gene40001	fig|1306409.3.peg.863__983__Molybdenum_cofactor_biosynthesis__moeA__Molybdopterin_biosynthesis_protein_MoeA	Cofactors, Vitamins, Prosthetic Groups, Pigments	Folate and pterines	Molybdenum cofactor biosynthesis
LD38_revised_scaffold53384_1_gene53999	fig|1316583.3.peg.1024__1211__Protocatechuate_branch_of_beta-ketoadipate_pathway__pcaC2__3-oxoadipate_enol-lactone_hydrolase/4-carboxymuconolactone_decarboxylase	Metabolism of Aromatic Compounds	Metabolism of central aromatic intermediates	Protocatechuate branch of beta-ketoadipate pathway
LD33_revised_C837784_1_gene70693	fig|1316583.3.peg.1714__749__Fermentations:_Mixed_acid__ADH__Alcohol_dehydrogenase_(EC_1.1.1.1)	Carbohydrates	Fermentation	Fermentations: Mixed acid
LV11_revised_scaffold39462_2_gene63708	fig|1316583.3.peg.1737__901__Legionaminic_Acid_Biosynthesis__PglF__UDP-N-acetylglucosamine_4,6-dehydratase_(EC_4.2.1.135)	Cell Wall and Capsule	Capsular and extracellular polysacchrides	Legionaminic Acid Biosynthesis
LD61_revised_scaffold167_1_gene13214	fig|1316931.3.peg.1583__570__Choline_and_Betaine_Uptake_and_Betaine_Biosynthesis__ChA__Choline_binding_protein_A	Stress Response	Osmotic stress	Choline and Betaine Uptake and Betaine Biosynthesis
HD16_revised_scaffold55316_1_gene5153	fig|1316931.3.peg.1818__941__Maltose_and_Maltodextrin_Utilization__MalF__Maltose/maltodextrin_ABC_transporter,_permease_protein_MalF	Carbohydrates	Di- and oligosaccharides	Maltose and Maltodextrin Utilization
LD61_revised_scaffold20311_2_gene42375	fig|1316932.3.peg.164__12__Restriction-Modification_System__HsdM__Type_I_restriction-modification_system,_DNA-methyltransferase_subunit_M_(EC_2.1.1.72)	DNA Metabolism	-	Restriction-Modification System
HD12_revised_scaffold44048_1_gene80532	fig|1316937.3.peg.1018__390__Bacterial_hemoglobins__1_Cl2__diguanylate_cyclase/phosphodiesterase_(GGDEF_&_EAL_domains)_with_PAS/PAC_sensor(s)	Stress Response	-	Bacterial hemoglobins
LD44_revised_scaffold63940_1_gene111681	fig|1316937.3.peg.3830__635__D-Galacturonate_and_D-Glucuronate_Utilization__KdgR1__Transcriptional_regulator_KdgR,_KDG_operon_repressor	Carbohydrates	Monosaccharides	D-Galacturonate and D-Glucuronate Utilization
LD53_revised_scaffold57789_2_gene106939	fig|1322346.3.peg.2107__1132__Phage_tail_fiber_proteins__TFP__Phage_tail_fiber_protein	Phages, Prophages, Transposable elements, Plasmids	Phages, Prophages	Phage tail fiber proteins
LD45_revised_scaffold24317_3_gene4491	fig|1322346.3.peg.2380__1132__Phage_tail_fiber_proteins__TFP__Phage_tail_fiber_protein	Phages, Prophages, Transposable elements, Plasmids	Phages, Prophages	Phage tail fiber proteins
HD30_revised_scaffold32128_3_gene8791	fig|1324966.3.peg.2083__464__CBSS-269801.1.peg.2186__R1__UPF0118_membrane_protein_YrrI	Clustering-based subsystems	DNA metabolism	CBSS-269801.1.peg.2186
HD8_revised_C1484589_1_gene83483	fig|1324966.3.peg.4181__90__Sortase__AP__Cell_wall_surface_anchor_family_protein	Cell Wall and Capsule	Gram-Positive cell wall components	Sortase
HD8_revised_scaffold106244_1_gene137459	fig|1326759.3.peg.2891__476__CBSS-316275.9.peg.382__Memb__FIG023911:_putative_membrane_protein	Clustering-based subsystems	-	CBSS-316275.9.peg.382
LD45_revised_scaffold24974_1_gene29500	fig|1328329.3.peg.3731__1099__Peptide_ABC_transport_system_Sap__SapB__Peptide_transport_system_permease_protein_SapB	Membrane Transport	ABC transporters	Peptide ABC transport system Sap
LD45_revised_scaffold27472_1_gene39717	fig|1328331.3.peg.351__1099__Peptide_ABC_transport_system_Sap__SapB__Peptide_transport_system_permease_protein_SapB	Membrane Transport	ABC transporters	Peptide ABC transport system Sap
LD45_revised_scaffold10552_2_gene20812	fig|1328332.3.peg.2802__1099__Peptide_ABC_transport_system_Sap__SapB__Peptide_transport_system_permease_protein_SapB	Membrane Transport	ABC transporters	Peptide ABC transport system Sap
HD18_revised_scaffold46610_1_gene58322	fig|1328870.3.peg.772__109__Staphylococcal_pathogenicity_islands_SaPI__Int__Integrase,_superantigen-encoding_pathogenicity_islands_SaPI	Phages, Prophages, Transposable elements, Plasmids	Pathogenicity islands	Staphylococcal pathogenicity islands SaPI
LD61_revised_scaffold14647_3_gene9563	fig|1329377.3.peg.3147__712__ESAT-6_proteins_secretion_system_in_Firmicutes__EsaA__Putative_secretion_accessory_protein_EsaA/YueB_/_Bacteriophage_SPP1_receptor	Membrane Transport	Protein secretion system, Type VII	ESAT-6 proteins secretion system in Firmicutes
LD33_revised_scaffold52192_2_gene34682	fig|1340495.3.peg.168__1222__Purine_conversions__NPP__Alkaline_phosphodiesterase_I_(EC_3.1.4.1)_/_Nucleotide_pyrophosphatase_(EC_3.6.1.9)	Nucleosides and Nucleotides	Purines	Purine conversions
HD8_revised_scaffold39564_1_gene170049	fig|1340495.3.peg.606__570__Choline_and_Betaine_Uptake_and_Betaine_Biosynthesis__ChA__Choline_binding_protein_A	Stress Response	Osmotic stress	Choline and Betaine Uptake and Betaine Biosynthesis
HD37_revised_scaffold49239_1_gene46660	fig|137708.3.peg.3698__992__Multidrug_Resistance,_Tripartite_Systems_Found_in_Gram_Negative_Bacteria__OM__Outer_membrane_component_of_tripartite_multidrug_resistance_system	Virulence	Resistance to antibiotics and toxic compounds	Multidrug Resistance, Tripartite Systems Found in Gram Negative Bacteria
LD61_revised_scaffold18429_1_gene33788	fig|137721.3.peg.3155__453__CBSS-246196.1.peg.364__R2__3-oxoacyl-[acyl-carrier_protein]_reductase_(EC_1.1.1.100)	Clustering-based subsystems	Fatty acid metabolic cluster	CBSS-246196.1.peg.364
HD40_revised_scaffold17876_2_gene87479	fig|138119.3.peg.2080__421__BlaR1_Family_Regulatory_Sensor-transducer_Disambiguation__BlaR1-like__Regulatory_sensor-transducer,_BlaR1/MecR1_family	Virulence	Resistance to antibiotics and toxic compounds	BlaR1 Family Regulatory Sensor-transducer Disambiguation
HD8_revised_scaffold92736_1_gene170885	fig|138119.3.peg.4512__589__Coenzyme_B12_biosynthesis__CbrV__Transmembrane_component_CbrV_of_energizing_module_of_predicted_cobalamin_ECF_transporter	Cofactors, Vitamins, Prosthetic Groups, Pigments	Tetrapyrroles	Coenzyme B12 biosynthesis
HD16_revised_scaffold55316_1_gene5141	fig|138119.41.peg.147__1170__Poly-gamma-glutamate_biosynthesis__AbrB__Transition_state_regulatory_protein_AbrB	Amino Acids and Derivatives	Glutamine, glutamate, aspartate, asparagine; ammonia assimilation	Poly-gamma-glutamate biosynthesis
HD18_revised_C777863_1_gene48159	fig|138119.41.peg.5193__323__cAMP_signaling_in_bacteria__??__Membrane_proteins_related_to_metalloendopeptidases	Regulation and Cell signaling	-	cAMP signaling in bacteria
HD54_revised_C683955_1_gene53675	fig|138119.41.peg.5193__323__cAMP_signaling_in_bacteria__??__Membrane_proteins_related_to_metalloendopeptidases	Regulation and Cell signaling	-	cAMP signaling in bacteria
HD1_revised_scaffold42047_1_gene51052	fig|139870.2.peg.24__1125__Phage_head_and_packaging__TerL__Phage_terminase,_large_subunit	Phages, Prophages, Transposable elements, Plasmids	Phages, Prophages	Phage head and packaging
HD5_revised_scaffold15328_1_gene53578	fig|146907.3.peg.1597__802__Glycerolipid_and_Glycerophospholipid_Metabolism_in_Bacteria__adh__Alcohol_dehydrogenase_(EC_1.1.1.1)	Fatty Acids, Lipids, and Isoprenoids	Phospholipids	Glycerolipid and Glycerophospholipid Metabolism in Bacteria
HD51_revised_scaffold38675_2_gene41428	fig|146907.3.peg.1845__155__Teichoic_and_lipoteichoic_acids_biosynthesis__DltR__Regulation_of_D-alanyl-lipoteichoic_acid_biosynthesis,_DltR	Cell Wall and Capsule	Gram-Positive cell wall components	Teichoic and lipoteichoic acids biosynthesis
HD12_revised_scaffold2528_4_gene81675	fig|146907.3.peg.2560__1131__Phage_shock_protein_(psp)_operon__PspA__Phage_shock_protein_A	Stress Response	-	Phage shock protein (psp) operon
HD18_revised_scaffold48274_1_gene30070	fig|146907.3.peg.3019__856__Inorganic_Sulfur_Assimilation__FDX__Ferredoxin	Sulfur Metabolism	Inorganic sulfur assimilation	Inorganic Sulfur Assimilation
LD33_revised_scaffold50776_9_gene68895	fig|146907.3.peg.311__301__Xylose_utilization__XynA__Endo-1,4-beta-xylanase_A_precursor_(EC_3.2.1.8)	Carbohydrates	Monosaccharides	Xylose utilization
HD8_revised_scaffold48232_2_gene183842	fig|148942.4.peg.1113__1126__Phage_integration_and_excision__Recomb__Site-specific_recombinase	Phages, Prophages, Transposable elements	Bacteriophage integration/excision/lysogeny	Phage integration and excision
HD18_revised_scaffold30503_2_gene8186	fig|148942.4.peg.1805__1126__Phage_integration_and_excision__Int__Integrase	Phages, Prophages, Transposable elements	Bacteriophage integration/excision/lysogeny	Phage integration and excision
HD38_revised_scaffold18893_1_gene30292	fig|1496.1.peg.358__421__BlaR1_Family_Regulatory_Sensor-transducer_Disambiguation__BlaR1-like__Regulatory_sensor-transducer,_BlaR1/MecR1_family	Virulence	Resistance to antibiotics and toxic compounds	BlaR1 Family Regulatory Sensor-transducer Disambiguation
HD35_revised_scaffold34117_3_gene77915	fig|156586.6.peg.1980__843__Housecleaning_nucleoside_triphosphate_pyrophosphatases__YjjG__Pyrimidine_5-nucleotidase_YjjG_(EC_3.1.3.5)	Stress Response	Detoxification	Housecleaning nucleoside triphosphate pyrophosphatases
LD77_revised_scaffold16292_1_gene9359	fig|157239.3.peg.1469__661__DNA_repair,_bacterial_RecBCD_pathway__RecC__Exodeoxyribonuclease_V_gamma_chain_(EC_3.1.11.5)_**_RecC	DNA Metabolism	DNA repair	DNA repair, bacterial RecBCD pathway
HD8_revised_scaffold96480_1_gene46937	fig|159087.4.peg.1847__421__BlaR1_Family_Regulatory_Sensor-transducer_Disambiguation__ATPase__Lead,_cadmium,_zinc_and_mercury_transporting_ATPase_(EC_3.6.3.3)_(EC_3.6.3.5);_Copper-translocating_P-type_ATPase_(EC_3.6.3.4)	Virulence	Resistance to antibiotics and toxic compounds	BlaR1 Family Regulatory Sensor-transducer Disambiguation
LD85_revised_scaffold7734_2_gene106585	fig|164756.6.peg.1039__264__Universal_stress_protein_family__Urp-famil__Universal_stress_protein_family	Stress Response	-	Universal stress protein family
HD37_revised_scaffold51260_1_gene31231	fig|167539.1.peg.504__771__Fructose_utilization__FK__Fructokinase_(EC_2.7.1.4)	Carbohydrates	Monosaccharides	Fructose utilization
LD38_revised_scaffold53253_1_gene8829	fig|1680.3.peg.1113__885__L-Arabinose_utilization__AbfA__Alpha-N-arabinofuranosidase_(EC_3.2.1.55)	Carbohydrates	Monosaccharides	L-Arabinose utilization
LD33_revised_scaffold51212_2_gene54879	fig|1680.3.peg.1191__120__Streptococcus_pneumoniae_Vancomycin_Tolerance_Locus__vex3__ABC_transporter_membrane-spanning_permease,_Pep_export,_Vex3	Virulence	Resistance to antibiotics and toxic compounds	Streptococcus pneumoniae Vancomycin Tolerance Locus
LD85_revised_scaffold62818_2_gene78614	fig|1680.3.peg.1218__711__ECF_class_transporters__YkoD__Duplicated_ATPase_component_YkoD_of_energizing_module_of_thiamin-regulated_ECF_transporter_for_HydroxyMethylPyrimidine	Membrane Transport	-	ECF class transporters
LD33_revised_scaffold50471_2_gene6758	fig|1680.3.peg.1228__457__CBSS-258594.1.peg.3339__R3__Glycosyltransferase	Clustering-based subsystems	Biosynthesis of galactoglycans and related lipopolysacharides	CBSS-258594.1.peg.3339
LD45_revised_scaffold26785_1_gene10440	fig|1680.3.peg.1231__711__ECF_class_transporters__RibUt__Duplicated_ATPase_component_of_energizing_module_of_riboflavin_ECF_transporter_/_Transmembrane_component_of_energizing_module_of_riboflavin_ECF_transporter	Membrane Transport	-	ECF class transporters
LD38_revised_scaffold30124_1_gene28517	fig|1680.3.peg.1369__862__Iojap__PCT__Phosphatidate_cytidylyltransferase_(EC_2.7.7.41)	Regulation and Cell signaling	-	Iojap
LD33_revised_scaffold47426_3_gene45457	fig|1680.3.peg.37__558__Chitin_and_N-acetylglucosamine_utilization__ABCb2__Predicted_ABC-type_beta-glucoside_transport_system,_permease_component	Carbohydrates	Aminosugars	Chitin and N-acetylglucosamine utilization
LD45_revised_scaffold25028_1_gene55229	fig|1680.3.peg.39__558__Chitin_and_N-acetylglucosamine_utilization__ABCc__Predicted_ABC-type_beta-glucoside_transport_system,_periplasmic_component	Carbohydrates	Aminosugars	Chitin and N-acetylglucosamine utilization
LD45_revised_scaffold25028_1_gene55228	fig|1680.3.peg.40__941__Maltose_and_Maltodextrin_Utilization__MalR__Transcriptional_regulator_of_beta-glucosides_utilization,_LacI_family	Carbohydrates	Di- and oligosaccharides	Maltose and Maltodextrin Utilization
LD33_revised_scaffold50948_1_gene24058	fig|1680.3.peg.419__885__L-Arabinose_utilization__AbfA-II__Alpha-L-arabinofuranosidase_II_precursor_(EC_3.2.1.55)	Carbohydrates	Monosaccharides	L-Arabinose utilization
LD45_revised_scaffold27836_1_gene39669	fig|1680.3.peg.425__670__DNA_topoisomerases,_Type_I,_ATP-independent__Topo-I__DNA_topoisomerase_I_(EC_5.99.1.2)	DNA Metabolism	DNA replication	DNA topoisomerases, Type I, ATP-independent
LD33_revised_scaffold7798_1_gene51617	fig|1680.3.peg.532__700__EC_3.4.19.-_Omega_peptidases__PyroGlu-__Pyrrolidone-carboxylate_peptidase_(EC_3.4.19.3)	Protein Metabolism	Protein degradation	EC 3.4.19.- Omega peptidases
LD33_revised_C832470_1_gene10996	fig|1680.3.peg.673__147__At5g04520_AT1G06240__ATE__Acyl-CoA_thioesterase_II_(EC_3.1.2.-)	Miscellaneous	Plant-Prokaryote comparative genomics	At5g04520 AT1G06240
LD85_revised_scaffold48125_2_gene19927	fig|1680.3.peg.708__769__Fructooligosaccharides(FOS)_and_Raffinose_Utilization__MsmR__MSM_(multiple_sugar_metabolism)_operon_regulatory_protein	Carbohydrates	Di- and oligosaccharides	Fructooligosaccharides(FOS) and Raffinose Utilization
LD85_revised_scaffold48125_2_gene19928	fig|1680.3.peg.709__941__Maltose_and_Maltodextrin_Utilization__SusB__Alpha-glucosidase_(EC_3.2.1.20)	Carbohydrates	Di- and oligosaccharides	Maltose and Maltodextrin Utilization
LD85_revised_scaffold959_8_gene87670	fig|1680.3.peg.743__551__ABC_transporter_oligopeptide_(TC_3.A.1.5.1)__oppF__Oligopeptide_transport_ATP-binding_protein_OppF_(TC_3.A.1.5.1)	Membrane Transport	ABC transporters	ABC transporter oligopeptide (TC 3.A.1.5.1)
HD5_revised_scaffold12190_4_gene99585	fig|169963.1.peg.153__221__Transport_of_Zinc__ZnuA__Zinc_ABC_transporter,_substrate-binding_protein_ZnuA	Membrane Transport	-	Transport of Zinc
HD1_revised_scaffold42030_1_gene52033	fig|176279.3.peg.627__155__Teichoic_and_lipoteichoic_acids_biosynthesis__PPRT__CDP-ribitol_ribitolphosphotransferase_(EC_2.7.8.14)	Cell Wall and Capsule	Gram-Positive cell wall components	Teichoic and lipoteichoic acids biosynthesis
HD12_revised_scaffold2669_7_gene12395	fig|1765.117.peg.12432__475__CBSS-316057.3.peg.659__R4__Protein_QmcA_(possibly_involved_in_integral_membrane_quality_control)	Clustering-based subsystems	Probably Ybbk-related hypothetical membrane proteins	CBSS-316057.3.peg.659
LD85_revised_scaffold39348_1_gene90048	fig|1765.120.peg.2240__586__Cobalt-zinc-cadmium_resistance__czcD__Cobalt-zinc-cadmium_resistance_protein_CzcD	Virulence	Resistance to antibiotics and toxic compounds	Cobalt-zinc-cadmium resistance
LD85_revised_scaffold959_7_gene10988	fig|1765.120.peg.4353__355__Bacterial_Chemotaxis__dppA__Dipeptide-binding_ABC_transporter,_periplasmic_substrate-binding_component_(TC_3.A.1.5.2)	Motility and Chemotaxis	-	Bacterial Chemotaxis
HD35_revised_scaffold83728_1_gene30843	fig|1765.169.peg.5767__714__Ectoine_biosynthesis_and_regulation__EctB__Diaminobutyrate-pyruvate_aminotransferase_(EC_2.6.1.46)	Stress Response	Osmotic stress	Ectoine biosynthesis and regulation
LD61_revised_scaffold16003_1_gene42058	fig|1765.174.peg.1533__558__Chitin_and_N-acetylglucosamine_utilization__NagQ__Predicted_transcriptional_regulator_of_N-Acetylglucosamine_utilization,_GntR_family	Carbohydrates	Aminosugars	Chitin and N-acetylglucosamine utilization
HD62_revised_scaffold10587_2_gene73697	fig|1765.178.peg.4772__293__Widespread_colonization_island__TadA__Type_II/IV_secretion_system_ATP_hydrolase_TadA/VirB11/CpaF,_TadA_subfamily	Membrane Transport	Protein secretion system, Type II	Widespread colonization island
LD1_revised_scaffold35746_2_gene34892	fig|1765.178.peg.4960__494__CBSS-393121.3.peg.2760__R6__Cell_division_transporter,_ATP-binding_protein_FtsE_(TC_3.A.5.1.1)	Clustering-based subsystems	Protein export?	CBSS-393121.3.peg.2760
LD85_revised_scaffold1128_2_gene3053	fig|1765.178.peg.7269__886__L-Cystine_Uptake_and_Metabolism__TcyK__L-Cystine_ABC_transporter,_periplasmic_cystine-binding_protein_TcyK	Sulfur Metabolism	Organic sulfur assimilation	L-Cystine Uptake and Metabolism
HD54_revised_scaffold30292_1_gene493	fig|1765.178.peg.7939__1165__Plasmid_replication__ParB__Chromosome_(plasmid)_partitioning_protein_ParB_/_Stage_0_sporulation_protein_J	DNA Metabolism	DNA replication	Plasmid replication
HD62_revised_scaffold64663_1_gene80620	fig|1765.178.peg.7939__1165__Plasmid_replication__ParB__Chromosome_(plasmid)_partitioning_protein_ParB_/_Stage_0_sporulation_protein_J	DNA Metabolism	DNA replication	Plasmid replication
HD55_revised_scaffold54694_1_gene23274	fig|1765.178.peg.7939__1165__Plasmid_replication__ParB__Chromosome_(plasmid)_partitioning_protein_ParB_/_Stage_0_sporulation_protein_J	DNA Metabolism	DNA replication	Plasmid replication
HD43_revised_C785358_1_gene55003	fig|1765.178.peg.7939__1165__Plasmid_replication__ParB__Chromosome_(plasmid)_partitioning_protein_ParB_/_Stage_0_sporulation_protein_J	DNA Metabolism	DNA replication	Plasmid replication
HD37_revised_scaffold10363_2_gene58782	fig|1765.187.peg.4152__464__CBSS-269801.1.peg.2186__R1__UPF0118_membrane_protein_YrrI	Clustering-based subsystems	DNA metabolism	CBSS-269801.1.peg.2186
LD45_revised_scaffold16901_1_gene23922	fig|1765.187.peg.4152__464__CBSS-269801.1.peg.2186__R1__UPF0118_membrane_protein_YrrI	Clustering-based subsystems	DNA metabolism	CBSS-269801.1.peg.2186
HD12_revised_scaffold2669_7_gene12393	fig|1765.187.peg.4152__464__CBSS-269801.1.peg.2186__R1__UPF0118_membrane_protein_YrrI	Clustering-based subsystems	DNA metabolism	CBSS-269801.1.peg.2186
HD35_revised_scaffold60024_1_gene20421	fig|1765.193.peg.2110__464__CBSS-269801.1.peg.2186__R1__UPF0118_membrane_protein_YrrI	Clustering-based subsystems	DNA metabolism	CBSS-269801.1.peg.2186
HD37_revised_scaffold41319_1_gene7112	fig|1765.193.peg.3997__101__Sporulation_Cluster__DivIC__Cell_division_protein_DivIC_(FtsB),_stabilizes_FtsL_against_RasP_cleavage	Dormancy and Sporulation	-	Sporulation Cluster
LD45_revised_scaffold226_4_gene26942	fig|1765.193.peg.4840__1100__Peptide_methionine_sulfoxide_reductase__R__Two-component_response_regulator_yesN,_associated_with_MetSO_reductase	Protein Metabolism	Protein processing and modification	Peptide methionine sulfoxide reductase
HD37_revised_scaffold51106_1_gene61123	fig|1765.193.peg.6855__1165__Plasmid_replication__ParA__Chromosome_(plasmid)_partitioning_protein_ParA_/_Sporulation_initiation_inhibitor_protein_Soj	DNA Metabolism	DNA replication	Plasmid replication
LD22_revised_C1140126_1_gene152490	fig|1765.193.peg.8758__301__Xylose_utilization__XynA__Endo-1,4-beta-xylanase_A_precursor_(EC_3.2.1.8)	Carbohydrates	Monosaccharides	Xylose utilization
HD38_revised_scaffold40535_2_gene69240	fig|1765.195.peg.3951__101__Sporulation_Cluster__R5__FIG007421:_forespore_shell_protein	Dormancy and Sporulation	-	Sporulation Cluster
HD23_revised_scaffold13912_3_gene82152	fig|177437.4.peg.3594__226__Triacylglycerol_metabolism__LPLec__Lysophospholipase_(EC_3.1.1.5)	Fatty Acids, Lipids, and Isoprenoids	Triacylglycerols	Triacylglycerol metabolism
HD5_revised_scaffold30114_3_gene93482	fig|178306.1.peg.2570__221__Transport_of_Zinc__ZupT__Zinc_transporter,_ZIP_family	Membrane Transport	-	Transport of Zinc
LD33_revised_scaffold26373_1_gene20715	fig|180281.4.peg.1813__1242__Pyruvate_metabolism_I:_anaplerotic_reactions,_PEP__ME__NAD-dependent_malic_enzyme_(EC_1.1.1.38)	Carbohydrates	Central carbohydrate metabolism	Pyruvate metabolism I: anaplerotic reactions, PEP
HD23_revised_scaffold41143_2_gene15198	fig|188937.1.peg.595__1101__Archaeal_lipids__MJ0861__Putative_Zn-dependent_hydrolase_in_polyisoprenoid_biosynthetic_cluster	Fatty Acids, Lipids, and Isoprenoids	Isoprenoids	Archaeal lipids
LD33_revised_scaffold52520_1_gene53594	fig|190650.1.peg.2802__80__At2g33980_At1g28960__R2__FIG017823:_ATPase,_MoxR_family	Miscellaneous	Plant-Prokaryote comparative genomics	At2g33980 At1g28960
LD64_revised_scaffold810_1_gene11612	fig|192952.1.peg.2291__12__Restriction-Modification_System__RhuM__Putative_predicted_metal-dependent_hydrolase	DNA Metabolism	-	Restriction-Modification System
LD33_revised_scaffold7798_2_gene59357	fig|192952.1.peg.2846__1175__Polyamine_Metabolism__PUTORNt__Putrescine-ornithine_antiporter	Amino Acids and Derivatives	Arginine; urea cycle, polyamines	Polyamine Metabolism
HD12_revised_scaffold2528_2_gene41692	fig|193567.1.peg.1184__682__Diadenylate_cyclase_cluster__R1__Diadenylate_cyclase_spyDAC;_Bacterial_checkpoint_controller_DisA_with_nucleotide-binding_domain	Cell Division and Cell Cycle	Bacterial checkpoint control	Diadenylate cyclase cluster
LV12_revised_scaffold19971_1_gene5689	fig|194439.1.peg.412__583__Cobalamin__CbiZ__Adenosylcobinamide_amidohydrolase_(EC_3.5.1.90)	Cofactors, Vitamins, Prosthetic Groups, Pigments	Tetrapyrroles	Cobalamin
HD1_revised_scaffold18204_2_gene79884	fig|194439.7.peg.1004__918__Lipoprotein_sorting_system__LolC__Lipoprotein_releasing_system_transmembrane_protein_LolC	Cell Wall and Capsule	Gram-Negative cell wall components	Lipoprotein sorting system
HD35_revised_scaffold35799_1_gene7778	fig|194439.7.peg.1004__918__Lipoprotein_sorting_system__LolC__Lipoprotein_releasing_system_transmembrane_protein_LolC	Cell Wall and Capsule	Gram-Negative cell wall components	Lipoprotein sorting system
LD33_revised_scaffold34347_2_gene56449	fig|196162.6.peg.3181__552__Cell_division_cluster_containing_FtsZ_and_FtsW__Antigen84__Cell_division_initiation_protein_DivIVA	Clustering-based subsystems	Cell Division	Cell division cluster containing FtsZ and FtsW
LD61_revised_scaffold4251_6_gene29624	fig|196162.6.peg.3758__11__Respiratory_dehydrogenases_1__G3PD__Glycerol-3-phosphate_dehydrogenase_(EC_1.1.5.3)	Respiration	Electron donating reactions	Respiratory dehydrogenases 1
LD61_revised_scaffold19746_2_gene14086	fig|196162.6.peg.692__647__D-ribose_utilization__RbsR__Transcriptional_regulator,_LacI_family	Carbohydrates	Monosaccharides	D-ribose utilization
HD16_revised_scaffold74_2_gene8249	fig|203119.1.peg.2249__147__At5g04520_AT1G06240__Hyp1__Large_exoproteins_involved_in_heme_utilization_or_adhesion	Miscellaneous	Plant-Prokaryote comparative genomics	At5g04520 AT1G06240
HD8_revised_scaffold53309_2_gene186534	fig|203119.1.peg.2271__402__Beta-Glucoside_Metabolism__CepA__Cellobiose_phosphorylase_(EC_2.4.1.20)	Carbohydrates	Di- and oligosaccharides	Beta-Glucoside Metabolism
HD8_revised_scaffold8835_3_gene158953	fig|203119.1.peg.3293__837__High_affinity_phosphate_transporter_and_control_of_PHO_regulon__PhoB__Phosphate_regulon_transcriptional_regulatory_protein_PhoB_(SphR)	Phosphorus Metabolism	-	High affinity phosphate transporter and control of PHO regulon
HD8_revised_scaffold69368_7_gene84601	fig|203119.11.peg.1672__1222__Purine_conversions__punph__Purine_nucleoside_phosphorylase_(EC_2.4.2.1)	Nucleosides and Nucleotides	Purines	Purine conversions
HD5_revised_scaffold20275_2_gene87461	fig|203120.7.peg.128__759__Folate_Biosynthesis__Trans4__ATPase_components_of_ABC_transporters_with_duplicated_ATPase_domains	Cofactors, Vitamins, Prosthetic Groups, Pigments	Folate and pterines	Folate Biosynthesis
LD85_revised_scaffold11748_7_gene42285	fig|205913.1.peg.1612__221__Transport_of_Zinc__ZnuC__Zinc_ABC_transporter,_ATP-binding_protein_ZnuC	Membrane Transport	-	Transport of Zinc
LD33_revised_scaffold50948_1_gene24060	fig|205913.1.peg.1793__885__L-Arabinose_utilization__AbfA-II__Alpha-L-arabinofuranosidase_II_precursor_(EC_3.2.1.55)	Carbohydrates	Monosaccharides	L-Arabinose utilization
LD61_revised_scaffold10283_6_gene38107	fig|205913.6.peg.784__1143__Phosphate_metabolism__EPP__Exopolyphosphatase_(EC_3.6.1.11)	Phosphorus Metabolism	-	Phosphate metabolism
HV31_revised_C353017_1_gene34011	fig|205921.3.peg.1785__291__WhiB_and_WhiB-type_regulatory_proteins___R1__Glycosyl_transferase,_family_2	Regulation and Cell signaling	-	WhiB and WhiB-type regulatory proteins_
HD16_revised_scaffold10145_2_gene24983	fig|205921.3.peg.1785__291__WhiB_and_WhiB-type_regulatory_proteins___R1__Glycosyl_transferase,_family_2	Regulation and Cell signaling	-	WhiB and WhiB-type regulatory proteins_
HD37_revised_scaffold9657_1_gene47933	fig|205921.3.peg.825__1126__Phage_integration_and_excision__Recomb__Site-specific_recombinase	Phages, Prophages, Transposable elements	Bacteriophage integration/excision/lysogeny	Phage integration and excision
LD38_revised_scaffold44373_1_gene11667	fig|206672.1.peg.484__769__Fructooligosaccharides(FOS)_and_Raffinose_Utilization__MsmR__MSM_(multiple_sugar_metabolism)_operon_regulatory_protein	Carbohydrates	Di- and oligosaccharides	Fructooligosaccharides(FOS) and Raffinose Utilization
LD85_revised_scaffold21970_3_gene23153	fig|206672.1.peg.933__221__Transport_of_Zinc__ZnuA__Zinc_ABC_transporter,_periplasmic-binding_protein_ZnuA	Membrane Transport	-	Transport of Zinc
LD46_revised_scaffold10407_4_gene6062	fig|208435.1.peg.1838__1126__Phage_integration_and_excision__Int__Integrase	Phages, Prophages, Transposable elements	Bacteriophage integration/excision/lysogeny	Phage integration and excision
HD12_revised_scaffold44048_1_gene80533	fig|208963.12.peg.1501__858__Alginate_metabolism__AlgI__Probable_poly(beta-D-mannuronate)_O-acetylase_(EC_2.3.1.-)	Cell Wall and Capsule	Capsular and extracellular polysacchrides	Alginate metabolism
LD61_revised_scaffold989_1_gene65786	fig|208964.12.peg.636__1175__Polyamine_Metabolism__Reg2s__Probable_two-component_sensor,_near_polyamine_transporter	Amino Acids and Derivatives	Arginine; urea cycle, polyamines	Polyamine Metabolism
HD23_revised_scaffold41143_2_gene15195	fig|209261.1.peg.2882__449__CBSS-216592.1.peg.3937__R20__UPF0313_[4Fe-4S]_protein_YgiQ	Clustering-based subsystems	-	CBSS-216592.1.peg.3937
HD38_revised_scaffold38236_1_gene24929	fig|209261.1.peg.2882__449__CBSS-216592.1.peg.3937__R20__UPF0313_[4Fe-4S]_protein_YgiQ	Clustering-based subsystems	-	CBSS-216592.1.peg.3937
LD33_revised_scaffold44647_4_gene20953	fig|211110.1.peg.1356__119__Streptococcus_agalactiae_virulome__Hem3__Hemolysin_III	Virulence	-	Streptococcus agalactiae virulome
HD6_revised_scaffold34499_3_gene20799	fig|211586.12.peg.345__914__Lipopolysaccharide_assembly__YrbG__Inner_membrane_protein_YrbG,_predicted_calcium/sodium:proton_antiporter	Cell Wall and Capsule	Gram-Negative cell wall components	Lipopolysaccharide assembly
HD23_revised_scaffold39997_1_gene19289	fig|212717.1.peg.1877__995__Murein_Hydrolases__AmiA__N-acetylmuramoyl-L-alanine_amidase_(EC_3.5.1.28)	Cell Wall and Capsule	-	Murein Hydrolases
HD23_revised_scaffold39997_1_gene19294	fig|216594.6.peg.4347__942__Mammalian_cell_entry_genes_(MCE)_in_Streptomyces__MceF__MCE-family_protein_MceF	Virulence	-	Mammalian cell entry genes (MCE) in Streptomyces
LD85_revised_scaffold61656_4_gene62317	fig|220668.1.peg.2817__890__L-rhamnose_utilization__RhaY__Predicted_L-rhamnose_permease_RhaY	Carbohydrates	Monosaccharides	L-rhamnose utilization
LD45_revised_scaffold2252_1_gene58198	fig|220668.1.peg.3011__894__Lactate_Racemization__LarC2__LarC2:_implicated_in_lactate_racemization	Miscellaneous	Lactate racemization	Lactate Racemization
HD12_revised_scaffold171_2_gene73576	fig|221109.1.peg.622__815__Gram_Positive_Competence__comC__Late_competence_protein_ComC,_processing_protease;_Leader_peptidase_(Prepilin_peptidase)_(EC_3.4.23.43)_/_N-methyltransferase_(EC_2.1.1.-)	DNA Metabolism	DNA uptake, competence	Gram Positive Competence
HV31_revised_scaffold20017_1_gene28560	fig|221109.1.peg.622__815__Gram_Positive_Competence__comC__Late_competence_protein_ComC,_processing_protease;_Leader_peptidase_(Prepilin_peptidase)_(EC_3.4.23.43)_/_N-methyltransferase_(EC_2.1.1.-)	DNA Metabolism	DNA uptake, competence	Gram Positive Competence
LD60_revised_scaffold16773_1_gene104317	fig|221988.1.peg.748__832__Heme,_hemin_uptake_and_utilization_systems_in_GramPositives__Fe-ABC2__Iron_compound_ABC_uptake_transporter_permease_protein	Iron acquisition and metabolism	-	Heme, hemin uptake and utilization systems in GramPositives
LD62_revised_scaffold3129_1_gene19121	fig|222523.6.peg.3603__658__DNA_repair,_bacterial__Ada__ADA_regulatory_protein	DNA Metabolism	DNA repair	DNA repair, bacterial
HD12_revised_scaffold4068_5_gene51222	fig|224308.1.peg.1576__352__rRNA_modification_bacteria__RsmB__16S_rRNA_(cytosine(967)-C(5))-methyltransferase_(EC_2.1.1.176)	RNA Metabolism	RNA processing and modification	rRNA modification bacteria
HD12_revised_scaffold4068_5_gene51223	fig|224308.1.peg.1577__352__rRNA_modification_bacteria__RlmN__23S_rRNA_(adenine(2503)-C(2))-methyltransferase_&_tRNA_(adenine(37)-C(2))-methyltransferase_(EC_2.1.1.192)_**_RlmN	RNA Metabolism	RNA processing and modification	rRNA modification bacteria
HD1_revised_scaffold42047_1_gene50949	fig|224325.1.peg.1944__1050__Anaerobic_benzoate_metabolism__BadG__Similar_to_benzoyl-CoA_reductase_subunit_D	Metabolism of Aromatic Compounds	Anaerobic degradation of aromatic compounds	Anaerobic benzoate metabolism
LD33_revised_scaffold52415_1_gene28242	fig|224911.5.peg.6466__872__Isoleucine_degradation__BkdR__Transcriptional_regulator_BkdR_of_isoleucine_and_valine_catabolism_operon	Amino Acids and Derivatives	Branched-chain amino acids	Isoleucine degradation
HD40_revised_scaffold13317_1_gene17136	fig|225725.1.peg.75__1126__Phage_integration_and_excision__Recomb__Site-specific_recombinase	Phages, Prophages, Transposable elements	Bacteriophage integration/excision/lysogeny	Phage integration and excision
LD54_revised_scaffold39386_1_gene56614	fig|226186.1.peg.2186__572__Chorismate_Synthesis__PSCVT1__5-Enolpyruvylshikimate-3-phosphate_synthase_(EC_2.5.1.19)_beta_sub-homology_division_**_AroF_beta	Amino Acids and Derivatives	Aromatic amino acids and derivatives	Chorismate Synthesis
HD38_revised_scaffold19402_1_gene55559	fig|226186.1.peg.4171__890__L-rhamnose_utilization__RGA__rhamnogalacturonan_acetylesterase	Carbohydrates	Monosaccharides	L-rhamnose utilization
HD18_revised_scaffold52566_2_gene46362	fig|227882.9.peg.6879__1199__Proteasome_archaeal__alpha-b__Proteasome_subunit_alpha_(EC_3.4.25.1),_bacterial	Protein Metabolism	Protein degradation	Proteasome archaeal
HD35_revised_C1478050_1_gene152913	fig|227882.9.peg.6879__1199__Proteasome_archaeal__alpha-b__Proteasome_subunit_alpha_(EC_3.4.25.1),_bacterial	Protein Metabolism	Protein degradation	Proteasome archaeal
LD47_revised_scaffold9280_2_gene103663	fig|228399.1.peg.1267__188__Thioredoxin-disulfide_reductase__Tpx__Thiol_peroxidase,_Tpx-type_(EC_1.11.1.15)	Sulfur Metabolism	-	Thioredoxin-disulfide reductase
LD14_revised_scaffold55284_1_gene102729	fig|228400.4.peg.1705__147__At5g04520_AT1G06240__Hyp1__Large_exoproteins_involved_in_heme_utilization_or_adhesion	Miscellaneous	Plant-Prokaryote comparative genomics	At5g04520 AT1G06240
LD94_revised_C779277_1_gene105748	fig|228400.4.peg.1705__147__At5g04520_AT1G06240__Hyp1__Large_exoproteins_involved_in_heme_utilization_or_adhesion	Miscellaneous	Plant-Prokaryote comparative genomics	At5g04520 AT1G06240
HD1_revised_scaffold42047_1_gene50931	fig|232721.5.peg.1796__199__Ton_and_Tol_transport_systems__HTAS__4-hydroxybenzoyl-CoA_thioesterase_family_active_site	Membrane Transport	-	Ton and Tol transport systems
HD12_revised_scaffold4068_24_gene106662	fig|234267.9.peg.4086__751__Flagellar_motility__CheY__Chemotaxis_regulator_-_transmits_chemoreceptor_signals_to_flagelllar_motor_components_CheY	Motility and Chemotaxis	Flagellar motility in Prokaryota	Flagellar motility
LD5_revised_scaffold5912_1_gene45611	fig|234267.9.peg.575__1078__Omega-amidase_KE2__ArgB__Acetylglutamate_kinase_(EC_2.7.2.8)	Miscellaneous	Plant-Prokaryote comparative genomics	Omega-amidase KE2
LD38_revised_C703502_1_gene8695	fig|235909.7.peg.1312__1200__Proteasome_bacterial__ssTyrR__Site-specific_tyrosine_recombinase_XerC	Protein Metabolism	Protein degradation	Proteasome bacterial
HD8_revised_scaffold81787_1_gene185128	fig|240292.6.peg.144__515__CO2_uptake,_carboxysome__Hat__High-affnity_carbon_uptake_protein_Hat/HatR	Carbohydrates	CO2 fixation	CO2 uptake, carboxysome
HD12_revised_scaffold6399_3_gene20347	fig|243230.17.peg.2767__1242__Pyruvate_metabolism_I:_anaplerotic_reactions,_PEP__C4-tr__Aerobic_C4-dicarboxylate_transporter_for_fumarate,_L-malate,_D-malate,_succunate	Carbohydrates	Central carbohydrate metabolism	Pyruvate metabolism I: anaplerotic reactions, PEP
LD33_revised_scaffold49325_2_gene39952	fig|243243.5.peg.748__554__Cell_envelope-associated_LytR-CpsA-Psr_transcriptional_attenuators__A1__Cell_envelope-associated_transcriptional_attenuator_LytR-CpsA-Psr,_subfamily_A1_(as_in_PMID19099556)	Regulation and Cell signaling	-	Cell envelope-associated LytR-CpsA-Psr transcriptional attenuators
HD22_revised_scaffold50844_2_gene26664	fig|243274.1.peg.309__134__Sugar_utilization_in_Thermotogales__TM0313__Predicted_aldo/keto_reductase_in_CelR_regulon,_COG4989	Carbohydrates	-	Sugar utilization in Thermotogales
LD85_revised_scaffold46078_1_gene52231	fig|243274.1.peg.942__134__Sugar_utilization_in_Thermotogales__TM0950__Hypothetical_protein_TM0950	Carbohydrates	-	Sugar utilization in Thermotogales
HD38_revised_scaffold37059_5_gene76048	fig|2433.3.peg.1139__654__DNA_processing_cluster__hyp1__Protein_involved_in_catabolism_of_external_DNA	DNA Metabolism	DNA uptake, competence	DNA processing cluster
HD37_revised_scaffold50464_2_gene65723	fig|243365.1.peg.2204__1085__Outer_membrane__YaeT__Outer_membrane_protein_assembly_factor_YaeT	Cell Wall and Capsule	Gram-Negative cell wall components	Outer membrane
LD33_revised_scaffold41118_2_gene16246	fig|243365.4.peg.1734__996__Murein_hydrolase_regulation_and_cell_death__lytS__Autolysis_histidine_kinase_LytS	Regulation and Cell signaling	Programmed Cell Death and Toxin-antitoxin Systems	Murein hydrolase regulation and cell death
HD23_revised_scaffold41143_2_gene15207	fig|244592.3.peg.2866__293__Widespread_colonization_island__Hyp6__NLP/P60_family_lipoprotein	Membrane Transport	Protein secretion system, Type II	Widespread colonization island
HV6_revised_scaffold11175_8_gene29690	fig|246194.6.peg.2535__1060__Anaerobic_respiratory_reductases__DSR__Dissimilatory_sulfite_reductase_(desulfoviridin),_alpha_and_beta_subunits	Respiration	Electron accepting reactions	Anaerobic respiratory reductases
LD52_revised_scaffold66511_1_gene80326	fig|246194.6.peg.511__586__Cobalt-zinc-cadmium_resistance__TRMer__Transcriptional_regulator,_MerR_family	Virulence	Resistance to antibiotics and toxic compounds	Cobalt-zinc-cadmium resistance
HD12_revised_scaffold6794_1_gene51520	fig|246195.3.peg.399__745__Fe-S_cluster_assembly__ThiJ/YajL__DJ-1/YajL/PfpI_superfamily,_includes_chaperone_protein_YajL_(former_ThiJ),_parkinsonism-associated_protein_DJ-1,_peptidases_PfpI,_Hsp31	Cofactors, Vitamins, Prosthetic Groups, Pigments	Fe-S clusters	Fe-S cluster assembly
LD24_revised_scaffold5295_1_gene25418	fig|246195.4.peg.861__914__Lipopolysaccharide_assembly__YrbD__Phospholipid_ABC_transporter_substrate-binding_protein_MlaD_/_Phospholipid_ABC_transporter_substrate-binding_protein_MlaD	Cell Wall and Capsule	Gram-Negative cell wall components	Lipopolysaccharide assembly
HD1_revised_scaffold42047_1_gene51046	fig|246199.4.peg.1005__807__Glycogen_metabolism__GP__Glycogen_phosphorylase_(EC_2.4.1.1)	Carbohydrates	Polysaccharides	Glycogen metabolism
HD1_revised_scaffold42030_1_gene52061	fig|246199.4.peg.1007__1275__RP_Bacterial_Cell_Division__minD__Septum_site-determining_protein_MinD	Clustering-based subsystems	-	RP Bacterial Cell Division
HD1_revised_scaffold42047_1_gene50920	fig|246199.4.peg.1027__1205__Protein_chaperones__ClpB__ClpB_protein	Protein Metabolism	Protein folding	Protein chaperones
HD1_revised_scaffold42047_1_gene50923	fig|246199.4.peg.1077__216__Translation_termination_factors_bacterial__RF-3__Peptide_chain_release_factor_3	Protein Metabolism	Protein biosynthesis	Translation termination factors bacterial
HD1_revised_scaffold42047_1_gene50917	fig|246199.4.peg.2031__995__Murein_Hydrolases__DacD__D-alanyl-D-alanine_carboxypeptidase_(EC_3.4.16.4)	Cell Wall and Capsule	-	Murein Hydrolases
HD1_revised_scaffold42047_1_gene51045	fig|246199.4.peg.2073__1272__RNA_processing_and_degradation,_bacterial__RNaseR__3-to-5_exoribonuclease_RNase_R	RNA Metabolism	RNA processing and modification	RNA processing and degradation, bacterial
HD1_revised_scaffold42047_1_gene50980	fig|246199.4.peg.2464__210__Transcription_initiation,_bacterial_sigma_factors__SigK__RNA_polymerase_sporulation_specific_sigma_factor_SigK	RNA Metabolism	Transcription	Transcription initiation, bacterial sigma factors
HD1_revised_scaffold42030_1_gene52054	fig|246199.4.peg.2559__1008__Ammonia_assimilation__amt__Ammonium_transporter	Nitrogen Metabolism	-	Ammonia assimilation
HD1_revised_scaffold42030_1_gene52053	fig|246199.4.peg.2560__1008__Ammonia_assimilation__GSIII__Glutamine_synthetase_type_III,_GlnN_(EC_6.3.1.2)	Nitrogen Metabolism	-	Ammonia assimilation
HD1_revised_scaffold42047_1_gene50983	fig|246199.4.peg.2822__383__tRNA_nucleotidyltransferase__cca__tRNA_nucleotidyltransferase_(EC_2.7.7.21)_(EC_2.7.7.25)	RNA Metabolism	RNA processing and modification	tRNA nucleotidyltransferase
HD1_revised_scaffold42030_1_gene52068	fig|246199.4.peg.2837__730__Experimental_ThMP_RZ__ThMPaseI__ThMPase_type_I_predicted	Cofactors, Vitamins, Prosthetic Groups, Pigments	-	Experimental ThMP RZ
HV6_revised_scaffold10963_4_gene93324	fig|246199.4.peg.2970__969__Methionine_Biosynthesis__SHSH__O-acetylhomoserine_sulfhydrylase_(EC_2.5.1.49)_/_O-succinylhomoserine_sulfhydrylase_(EC_2.5.1.48)	Amino Acids and Derivatives	Lysine, threonine, methionine, and cysteine	Methionine Biosynthesis
HD8_revised_scaffold20479_1_gene47834	fig|246199.4.peg.3210__1244__Pyruvate:ferredoxin_oxidoreductase__PFOR__Pyruvate-flavodoxin_oxidoreductase_(EC_1.2.7.-)	Carbohydrates	Central carbohydrate metabolism	Pyruvate:ferredoxin oxidoreductase
HD1_revised_scaffold42030_1_gene52078	fig|246199.4.peg.3213__27__Ribosome_LSU_bacterial__L3p__LSU_ribosomal_protein_L3p_(L3e)	Protein Metabolism	Protein biosynthesis	Ribosome LSU bacterial
HD1_revised_scaffold42030_1_gene52079	fig|246199.4.peg.3214__27__Ribosome_LSU_bacterial__L4p__LSU_ribosomal_protein_L4p_(L1e)	Protein Metabolism	Protein biosynthesis	Ribosome LSU bacterial
HD1_revised_scaffold42030_1_gene52080	fig|246199.4.peg.3215__27__Ribosome_LSU_bacterial__L23p__LSU_ribosomal_protein_L23p_(L23Ae)	Protein Metabolism	Protein biosynthesis	Ribosome LSU bacterial
HD1_revised_scaffold42030_1_gene52081	fig|246199.4.peg.3216__27__Ribosome_LSU_bacterial__L2p__LSU_ribosomal_protein_L2p_(L8e)	Protein Metabolism	Protein biosynthesis	Ribosome LSU bacterial
HD1_revised_scaffold42030_1_gene52084	fig|246199.4.peg.3219__83__Single-copy_ribosomal_proteins__S3p__SSU_ribosomal_protein_S3p_(S3e)	Protein Metabolism	Protein biosynthesis	Single-copy ribosomal proteins
HD1_revised_scaffold42030_1_gene52085	fig|246199.4.peg.3220__83__Single-copy_ribosomal_proteins__L16p__LSU_ribosomal_protein_L16p_(L10e)	Protein Metabolism	Protein biosynthesis	Single-copy ribosomal proteins
HD1_revised_scaffold42030_1_gene52086	fig|246199.4.peg.3221__27__Ribosome_LSU_bacterial__L29p__LSU_ribosomal_protein_L29p_(L35e)	Protein Metabolism	Protein biosynthesis	Ribosome LSU bacterial
HD1_revised_scaffold42030_1_gene52087	fig|246199.4.peg.3222__32__Ribosome_SSU_bacterial__S17p__SSU_ribosomal_protein_S17p_(S11e)	Protein Metabolism	Protein biosynthesis	Ribosome SSU bacterial
HD1_revised_scaffold42030_1_gene52088	fig|246199.4.peg.3223__27__Ribosome_LSU_bacterial__L14p__LSU_ribosomal_protein_L14p_(L23e)	Protein Metabolism	Protein biosynthesis	Ribosome LSU bacterial
HD1_revised_scaffold42030_1_gene52090	fig|246199.4.peg.3225__27__Ribosome_LSU_bacterial__L5p__LSU_ribosomal_protein_L5p_(L11e)	Protein Metabolism	Protein biosynthesis	Ribosome LSU bacterial
HD1_revised_scaffold42030_1_gene52091	fig|246199.4.peg.3227__32__Ribosome_SSU_bacterial__S8p__SSU_ribosomal_protein_S8p_(S15Ae)	Protein Metabolism	Protein biosynthesis	Ribosome SSU bacterial
HD1_revised_scaffold42030_1_gene52092	fig|246199.4.peg.3228__27__Ribosome_LSU_bacterial__L6p__LSU_ribosomal_protein_L6p_(L9e)	Protein Metabolism	Protein biosynthesis	Ribosome LSU bacterial
HD1_revised_scaffold42030_1_gene52093	fig|246199.4.peg.3229__27__Ribosome_LSU_bacterial__L18p__LSU_ribosomal_protein_L18p_(L5e)	Protein Metabolism	Protein biosynthesis	Ribosome LSU bacterial
HD1_revised_scaffold42030_1_gene52094	fig|246199.4.peg.3230__24__Ribosomal_protein_S5p_acylation__S5p__SSU_ribosomal_protein_S5p_(S2e)	Protein Metabolism	Protein processing and modification	Ribosomal protein S5p acylation
HD1_revised_scaffold42030_1_gene52096	fig|246199.4.peg.3232__83__Single-copy_ribosomal_proteins__L15p__LSU_ribosomal_protein_L15p_(L27Ae)	Protein Metabolism	Protein biosynthesis	Single-copy ribosomal proteins
HD1_revised_scaffold42030_1_gene52098	fig|246199.4.peg.3234__1222__Purine_conversions__AK__Adenylate_kinase_(EC_2.7.4.3)	Nucleosides and Nucleotides	Purines	Purine conversions
HD1_revised_scaffold42030_1_gene52101	fig|246199.4.peg.3237__214__Translation_initiation_factors_bacterial__IF-1__Translation_initiation_factor_1	Protein Metabolism	Protein biosynthesis	Translation initiation factors bacterial
HD1_revised_scaffold42030_1_gene52102	fig|246199.4.peg.3239__83__Single-copy_ribosomal_proteins__S13p__SSU_ribosomal_protein_S13p_(S18e)	Protein Metabolism	Protein biosynthesis	Single-copy ribosomal proteins
HD1_revised_scaffold42030_1_gene52104	fig|246199.4.peg.3241__83__Single-copy_ribosomal_proteins__S4p__SSU_ribosomal_protein_S4p_(S9e)	Protein Metabolism	Protein biosynthesis	Single-copy ribosomal proteins
HD1_revised_scaffold42030_1_gene52105	fig|246199.4.peg.3242__1270__RNA_polymerase_bacterial__alpha__DNA-directed_RNA_polymerase_alpha_subunit_(EC_2.7.7.6)	RNA Metabolism	Transcription	RNA polymerase bacterial
HD1_revised_scaffold42030_1_gene52106	fig|246199.4.peg.3243__83__Single-copy_ribosomal_proteins__L17p__LSU_ribosomal_protein_L17p	Protein Metabolism	Protein biosynthesis	Single-copy ribosomal proteins
HD1_revised_scaffold42030_1_gene52040	fig|246199.4.peg.3309__190__Threonine_and_Homoserine_Biosynthesis__Hom__Homoserine_dehydrogenase_(EC_1.1.1.3)	Amino Acids and Derivatives	Lysine, threonine, methionine, and cysteine	Threonine and Homoserine Biosynthesis
HD1_revised_scaffold42030_1_gene52045	fig|246199.4.peg.3314__279__V-Type_ATP_synthase__K__V-type_ATP_synthase_subunit_K_(EC_3.6.3.14)	Respiration	ATP synthases	V-Type ATP synthase
HD1_revised_scaffold42030_1_gene52049	fig|246199.4.peg.3318__279__V-Type_ATP_synthase__B__V-type_ATP_synthase_subunit_B_(EC_3.6.3.14)	Respiration	ATP synthases	V-Type ATP synthase
HD1_revised_scaffold42030_1_gene52037	fig|246199.4.peg.3441__190__Threonine_and_Homoserine_Biosynthesis__ThrB__Homoserine_kinase_(EC_2.7.1.39)	Amino Acids and Derivatives	Lysine, threonine, methionine, and cysteine	Threonine and Homoserine Biosynthesis
LD4_revised_scaffold19414_1_gene32222	fig|246199.4.peg.353__412__Biogenesis_of_c-type_cytochromes__AH__Aconitate_hydratase_(EC_4.2.1.3)	Respiration	-	Biogenesis of c-type cytochromes
HD1_revised_scaffold42030_1_gene52071	fig|246199.4.peg.432__207__Transcription_factors_bacterial__NusG__Transcription_antitermination_protein_NusG	RNA Metabolism	Transcription	Transcription factors bacterial
HD1_revised_scaffold42030_1_gene52072	fig|246199.4.peg.433__83__Single-copy_ribosomal_proteins__L11p__LSU_ribosomal_protein_L11p_(L12e)	Protein Metabolism	Protein biosynthesis	Single-copy ribosomal proteins
HD1_revised_scaffold42030_1_gene52073	fig|246199.4.peg.434__27__Ribosome_LSU_bacterial__L1p__LSU_ribosomal_protein_L1p_(L10Ae)	Protein Metabolism	Protein biosynthesis	Ribosome LSU bacterial
HD1_revised_scaffold42047_1_gene50964	fig|246199.4.peg.602__1205__Protein_chaperones__DnaK__Chaperone_protein_DnaK	Protein Metabolism	Protein folding	Protein chaperones
HD16_revised_scaffold55316_1_gene5144	fig|246199.4.peg.788__1243__Pyruvate_metabolism_II:_acetyl-CoA,_acetogenesis_from_pyruvate__CobB__NAD-dependent_protein_deacetylase_of_SIR2_family	Carbohydrates	Central carbohydrate metabolism	Pyruvate metabolism II: acetyl-CoA, acetogenesis from pyruvate
HD1_revised_scaffold42030_1_gene52126	fig|246199.4.peg.859__1175__Polyamine_Metabolism__AUH__Agmatinase_(EC_3.5.3.11)	Amino Acids and Derivatives	Arginine; urea cycle, polyamines	Polyamine Metabolism
HD1_revised_scaffold42030_1_gene52123	fig|246199.4.peg.862__276__Urea_decomposition__UreB__Urease_beta_subunit_(EC_3.5.1.5)_/_Urease_gamma_subunit_(EC_3.5.1.5)	Amino Acids and Derivatives	Arginine; urea cycle, polyamines	Urea decomposition
HD1_revised_scaffold42030_1_gene52119	fig|246199.4.peg.866__276__Urea_decomposition__UreG__Urease_accessory_protein_UreG	Amino Acids and Derivatives	Arginine; urea cycle, polyamines	Urea decomposition
LD21_revised_scaffold3496_17_gene50338	fig|246199.4.peg.894__719__Entner-Doudoroff_Pathway__PgK__Phosphoglycerate_kinase_(EC_2.7.2.3)	Carbohydrates	Central carbohydrate metabolism	Entner-Doudoroff Pathway
HD37_revised_scaffold49239_1_gene46666	fig|251221.1.peg.1372__745__Fe-S_cluster_assembly__SufD__Iron-sulfur_cluster_assembly_protein_SufD	Cofactors, Vitamins, Prosthetic Groups, Pigments	Fe-S clusters	Fe-S cluster assembly
LD22_revised_scaffold85824_2_gene161806	fig|257310.1.peg.4139__190__Threonine_and_Homoserine_Biosynthesis__ThrC__Threonine_synthase_(EC_4.2.3.1)	Amino Acids and Derivatives	Lysine, threonine, methionine, and cysteine	Threonine and Homoserine Biosynthesis
LD80_revised_scaffold13381_1_gene63069	fig|258594.8.peg.2281__971__Methionine_Salvage__DKMTPPE-2__similar_to_ribulose-1,5-bisphosphate_carboxylase,_Type_III,_too	Amino Acids and Derivatives	Lysine, threonine, methionine, and cysteine	Methionine Salvage
LD33_revised_scaffold51630_1_gene31940	fig|258594.8.peg.696__1031__Anaerobic_Aromatic_Degredation_(benzoate)__BadF__Benzoyl-CoA_reductase_subunit_A_(EC_1.3.7.8)	Metabolism of Aromatic Compounds	Anaerobic degradation of aromatic compounds	Anaerobic Aromatic Degredation (benzoate)
HD16_revised_scaffold52690_1_gene34067	fig|262071.2.peg.72__1125__Phage_head_and_packaging__Min__Phage_minor_capsid_protein	Phages, Prophages, Transposable elements, Plasmids	Phages, Prophages	Phage head and packaging
LD43_revised_scaffold7888_1_gene15669	fig|262727.1.peg.932__873__Isoprenoid_Biosynthesis__ISPE__4-diphosphocytidyl-2-C-methyl-D-erythritol_kinase_(EC_2.7.1.148)	Fatty Acids, Lipids, and Isoprenoids	Isoprenoids	Isoprenoid Biosynthesis
LD3_revised_scaffold11651_5_gene70040	fig|264199.3.peg.1889__102__At3g21300__Asn_C__Aspartyl-tRNA(Asn)_amidotransferase_subunit_C_(EC_6.3.5.6)_@_Glutamyl-tRNA(Gln)_amidotransferase_subunit_C_(EC_6.3.5.7)	Predictions based on plant-prokaryote comparative analysis	-	At3g21300
HD12_revised_scaffold4068_5_gene51209	fig|264199.3.peg.397__1176__Polyglycerolphosphate_lipoteichoic_acid_biosynthesis__LtaS-IIc__Lipoteichoic_acid_synthase_LtaS_Type_IIc	Cell Wall and Capsule	Gram-Positive cell wall components	Polyglycerolphosphate lipoteichoic acid biosynthesis
LD79_revised_scaffold54311_1_gene97607	fig|264199.3.peg.856__925__Lysine_Biosynthesis_DAP_Pathway__DAPDC__Diaminopimelate_decarboxylase_(EC_4.1.1.20)	Amino Acids and Derivatives	Lysine, threonine, methionine, and cysteine	Lysine Biosynthesis DAP Pathway
HD1_revised_scaffold42030_1_gene52131	fig|264732.11.peg.2046__846__Hydrogenases__PPP__Periplasmic_[FeFe]_hydrogenase_(EC_1.12.7.2)	Respiration	Electron donating reactions	Hydrogenases
LD80_revised_scaffold7305_1_gene14131	fig|264732.11.peg.2358__759__Folate_Biosynthesis__pabAb__Para-aminobenzoate_synthase,_amidotransferase_component_(EC_2.6.1.85)	Cofactors, Vitamins, Prosthetic Groups, Pigments	Folate and pterines	Folate Biosynthesis
LD90_revised_C279552_1_gene39424	fig|264732.11.peg.468__793__Glutathione-regulated_potassium-efflux_system_and_associated_functions__TusD__tRNA_5-methylaminomethyl-2-thiouridine_synthase_subunit_TusD	Potassium metabolism	-	Glutathione-regulated potassium-efflux system and associated functions
LD62_revised_scaffold8297_1_gene1668	fig|264732.9.peg.1589__757__Flavohaemoglobin__Cl__H(+)/Cl(-)_exchange_transporter_ClcA	Stress Response	-	Flavohaemoglobin
HD27_revised_scaffold55572_1_gene28554	fig|264732.9.peg.364__848__Hydroxyaromatic_decarboxylase_family__bsdC__Hydroxyaromatic_non-oxidative_decarboxylase_protein_C_(EC_4.1.1.-)	Metabolism of Aromatic Compounds	Anaerobic degradation of aromatic compounds	Hydroxyaromatic decarboxylase family
HD35_revised_scaffold83771_3_gene83334	fig|265311.5.peg.354__611__Copper_homeostasis__CIA__Lead,_cadmium,_zinc_and_mercury_transporting_ATPase_(EC_3.6.3.3)_(EC_3.6.3.5);_Copper-translocating_P-type_ATPase_(EC_3.6.3.4)	Virulence	Resistance to antibiotics and toxic compounds	Copper homeostasis
LD54_revised_C756241_1_gene18823	fig|265669.9.peg.2832__921__Listeria_surface_proteins:_Internalin-like_proteins__lmo2821__Internalin-like_protein_(LPXTG_motif)_Lmo2821_homolog	Virulence, Disease and Defense	Invasion and intracellular resistance	Listeria surface proteins: Internalin-like proteins
HD12_revised_scaffold6399_3_gene20340	fig|266117.10.peg.963__78__SigmaB_stress_responce_regulation__sig70__RNA_polymerase_sigma-70_factor	Stress Response	-	SigmaB stress responce regulation
LD33_revised_scaffold43236_3_gene21341	fig|266264.4.peg.3954__421__BlaR1_Family_Regulatory_Sensor-transducer_Disambiguation__M48__Peptidase_M48,_Ste24p_precursor	Virulence	Resistance to antibiotics and toxic compounds	BlaR1 Family Regulatory Sensor-transducer Disambiguation
HD23_revised_scaffold23822_1_gene26177	fig|266834.1.peg.1684__473__CBSS-316057.3.peg.1308__R8__RNA_methyltransferase_Atu0341	Clustering-based subsystems	Putative asociate of RNA polymerase sigma-54 factor rpoN	CBSS-316057.3.peg.1308
LD5_revised_scaffold12267_1_gene36675	fig|266835.1.peg.115__743__Fatty_acid_degradation_regulons__FadH__2,4-dienoyl-CoA_reductase_[NADPH]_(EC_1.3.1.34)	Fatty Acids, Lipids, and Isoprenoids	Fatty acids	Fatty acid degradation regulons
HD37_revised_scaffold31883_1_gene21585	fig|266835.9.peg.2559__473__CBSS-316057.3.peg.1308__R8__macromolecule_metabolism;_macromolecule_synthesis,_modification;_rna_synthesis,_modification_,_dna_transcription	Clustering-based subsystems	Putative asociate of RNA polymerase sigma-54 factor rpoN	CBSS-316057.3.peg.1308
LD85_revised_scaffold61656_4_gene62315	fig|266940.5.peg.137__890__L-rhamnose_utilization__RhaR1__Transcriptional_regulator_of_rhamnose_utilization,_LacI_family	Carbohydrates	Monosaccharides	L-rhamnose utilization
HD8_revised_scaffold5888_3_gene170091	fig|267410.1.peg.1444__221__Transport_of_Zinc__ZnuA__Zinc_ABC_transporter,_periplasmic-binding_protein_ZnuA	Membrane Transport	-	Transport of Zinc
HD1_revised_scaffold42030_1_gene52097	fig|267410.1.peg.2541__844__HtrA_and_Sec_secretion__SecY__Preprotein_translocase_secY_subunit_(TC_3.A.5.1.1)	Membrane Transport	Protein translocation across cytoplasmic membrane	HtrA and Sec secretion
HD8_revised_scaffold47812_2_gene37872	fig|269482.4.peg.5065__914__Lipopolysaccharide_assembly__YfgL__Outer_membrane_protein_YfgL,_lipoprotein_component_of_the_protein_assembly_complex_(forms_a_complex_with_YaeT,_YfiO,_and_NlpB)	Cell Wall and Capsule	Gram-Negative cell wall components	Lipopolysaccharide assembly
HD37_revised_scaffold187_2_gene77767	fig|269483.5.peg.5548__1151__Phospholipid_and_Fatty_acid_biosynthesis_related_cluster__R12__Putative_transmembrane_protein	Fatty Acids, Lipids, and Isoprenoids	Fatty acids	Phospholipid and Fatty acid biosynthesis related cluster
HD18_revised_scaffold11702_2_gene24498	fig|269483.5.peg.5548__1151__Phospholipid_and_Fatty_acid_biosynthesis_related_cluster__R12__Putative_transmembrane_protein	Fatty Acids, Lipids, and Isoprenoids	Fatty acids	Phospholipid and Fatty acid biosynthesis related cluster
LD57_revised_scaffold12108_1_gene19395	fig|269797.3.peg.3487__689__Diphthamide_biosynthesis__SAHdea__Methylthioadenosine_deaminase	Protein Metabolism	Protein processing and modification	Diphthamide biosynthesis
HD38_revised_scaffold15132_1_gene36871	fig|269798.12.peg.2159__809__Glycolysis_and_Gluconeogenesis__PgM__Phosphoglycerate_mutase_(EC_5.4.2.11)	Carbohydrates	Central carbohydrate metabolism	Glycolysis and Gluconeogenesis
LD93_revised_scaffold29983_1_gene33911	fig|269798.16.peg.2167__879__KDO2-Lipid_A_biosynthesis__Wzy__Oligosaccharide_repeat_unit_polymerase_Wzy	Cell Wall and Capsule	Gram-Negative cell wall components	KDO2-Lipid A biosynthesis
LD66_revised_scaffold21682_1_gene10186	fig|269799.3.peg.1707__983__Molybdenum_cofactor_biosynthesis__CMCT__Molybdenum_cofactor_cytidylyltransferase_(EC_2.7.7.76)_**_MocA	Cofactors, Vitamins, Prosthetic Groups, Pigments	Folate and pterines	Molybdenum cofactor biosynthesis
LD45_revised_scaffold27816_1_gene29919	fig|269799.3.peg.2589__893__LOS_core_oligosaccharide_biosynthesis__WaaF__ADP-heptose--lipooligosaccharide_heptosyltransferase_II	Cell Wall and Capsule	Gram-Negative cell wall components	LOS core oligosaccharide biosynthesis
LD45_revised_scaffold24594_1_gene32404	fig|269800.4.peg.2370__168__Test_-_Riboflavin__Prot_repair__Ribulosamine/erythrulosamine_3-kinase_potentially_involved_in_protein_deglycation	Cofactors, Vitamins, Prosthetic Groups, Pigments	Riboflavin, FMN, FAD	Test - Riboflavin
HD16_revised_C714351_1_gene88109	fig|272558.1.peg.1295__1132__Phage_tail_fiber_proteins__TFP2__Phage_tail_fibers	Phages, Prophages, Transposable elements, Plasmids	Phages, Prophages	Phage tail fiber proteins
HD37_revised_scaffold39843_2_gene63656	fig|272558.8.peg.1844__610__Control_of_cell_elongation_-_division_cycle_in_Bacilli__FIG005686__FIG005686:_hypothetical_protein	Cell Division and Cell Cycle	-	Control of cell elongation - division cycle in Bacilli
HD12_revised_scaffold4068_5_gene51230	fig|272558.8.peg.692__1192__Proline,_4-hydroxyproline_uptake_and_utilization__PutP__Proline/sodium_symporter_PutP_(TC_2.A.21.2.1)_@_Propionate/sodium_symporter	Amino Acids and Derivatives	Proline and 4-hydroxyproline	Proline, 4-hydroxyproline uptake and utilization
HD30_revised_scaffold33992_5_gene35752	fig|272558.8.peg.729__671__DNA_topoisomerases,_Type_II,_ATP-dependent__Topo-II__DNA_topoisomerase_II_(EC_5.99.1.3)	DNA Metabolism	DNA replication	DNA topoisomerases, Type II, ATP-dependent
HD16_revised_scaffold10600_1_gene80118	fig|272562.1.peg.1060__572__Chorismate_Synthesis__PSCVT1__5-Enolpyruvylshikimate-3-phosphate_synthase_(EC_2.5.1.19)_beta_sub-homology_division_**_AroF_beta	Amino Acids and Derivatives	Aromatic amino acids and derivatives	Chorismate Synthesis
LD60_revised_scaffold30132_2_gene9416	fig|272562.8.peg.169__224__Trehalose_Biosynthesis__AmyA__alpha-amylase	Carbohydrates	Di- and oligosaccharides	Trehalose Biosynthesis
HD8_revised_scaffold9469_6_gene106165	fig|272562.8.peg.3398__1143__Phosphate_metabolism__PhoR__Two-component_system_sensor_histidine_kinase	Phosphorus Metabolism	-	Phosphate metabolism
HD8_revised_C1469051_1_gene163544	fig|272562.8.peg.389__90__Sortase__SrtA__Sortase_A,_LPXTG_specific	Cell Wall and Capsule	Gram-Positive cell wall components	Sortase
LD33_revised_scaffold1278_1_gene14123	fig|272564.4.peg.1042__1242__Pyruvate_metabolism_I:_anaplerotic_reactions,_PEP__MalK__Two-component_sensor_histidine_kinase	Carbohydrates	Central carbohydrate metabolism	Pyruvate metabolism I: anaplerotic reactions, PEP
HD37_revised_scaffold51814_1_gene7663	fig|272568.12.peg.3202__501__CBSS-52598.3.peg.2843__R2__FIG017823:_ATPase,_MoxR_family	Clustering-based subsystems	alpha-proteobacterial cluster of hypotheticals	CBSS-52598.3.peg.2843
HD35_revised_scaffold21977_2_gene171046	fig|272622.8.peg.2213__607__Conserved_gene_cluster_possibly_involved_in_RNA_metabolism__DegV__DegV_family_protein_in_cluster_with_TrmH_family_tRNA/rRNA_methyltransferase_YacO	Miscellaneous	Plant-Prokaryote comparative genomics	Conserved gene cluster possibly involved in RNA metabolism
LD48_revised_scaffold26014_1_gene43507	fig|272623.1.peg.1551__301__Xylose_utilization__XylR_EC__Xylose_activator_XylR_(AraC_family)	Carbohydrates	Monosaccharides	Xylose utilization
LD38_revised_scaffold49543_1_gene41105	fig|272626.1.peg.1852__102__At3g21300__DAGK__Diacylglycerol_kinase,_Bacillus_type_(EC_2.7.1.107)	Predictions based on plant-prokaryote comparative analysis	-	At3g21300
LD45_revised_scaffold16406_1_gene33510	fig|272626.1.peg.2366__920__Listeria_phi-A118-like_prophages__gp17__Putative_tail_or_base_plate_protein_gp17_[Bacteriophage_A118]	Phages, Prophages, Transposable elements, Plasmids	Phages, Prophages	Listeria phi-A118-like prophages
LD45_revised_scaffold16406_1_gene33509	fig|272626.1.peg.3041__920__Listeria_phi-A118-like_prophages__gp18__Putative_tail_or_base_plate_protein_gp18_[Bacteriophage_A118]	Phages, Prophages, Transposable elements, Plasmids	Phages, Prophages	Listeria phi-A118-like prophages
HD5_revised_scaffold39303_1_gene94949	fig|272626.1.peg.72__920__Listeria_phi-A118-like_prophages__gp36__Repressor_(CI-like)_[Bacteriophage_A118]	Phages, Prophages, Transposable elements, Plasmids	Phages, Prophages	Listeria phi-A118-like prophages
LD40_revised_scaffold17400_1_gene52204	fig|272630.7.peg.1844__719__Entner-Doudoroff_Pathway__PGLe__6-phosphogluconolactonase_(EC_3.1.1.31),_eukaryotic_type	Carbohydrates	Central carbohydrate metabolism	Entner-Doudoroff Pathway
LD33_revised_scaffold41820_1_gene19516	fig|272632.1.peg.98__352__rRNA_modification_bacteria__RlmE2__RNA_binding_methyltransferase_FtsJ_like	RNA Metabolism	RNA processing and modification	rRNA modification bacteria
LD45_revised_scaffold13957_4_gene7760	fig|273068.3.peg.332__125__At4g10620_At3g57180_At3g47450__ComEC__DNA_internalization-related_competence_protein_ComEC/Rec2	Predictions based on plant-prokaryote comparative analysis	-	At4g10620 At3g57180 At3g47450
LD4_revised_scaffold42712_1_gene62520	fig|273068.3.peg.395__502__CBSS-56780.10.peg.1536__YbeY__Metal-dependent_hydrolase_YbeY,_involved_in_rRNA_and/or_ribosome_maturation_and_assembly	Clustering-based subsystems	-	CBSS-56780.10.peg.1536
HD18_revised_scaffold34269_4_gene52569	fig|273068.5.peg.2206__872__Isoleucine_degradation__Ptb__phosphotransbutyrylase_(EC_2.3.1.19)	Amino Acids and Derivatives	Branched-chain amino acids	Isoleucine degradation
HD18_revised_scaffold45295_7_gene48047	fig|278956.3.peg.4774__916__Lipopolysaccharide-related_cluster_in_Alphaproteobacteria__MsbA__Lipid_A_export_ATP-binding/permease_protein_MsbA	Cell Wall and Capsule	Gram-Negative cell wall components	Lipopolysaccharide-related cluster in Alphaproteobacteria
HD12_revised_scaffold6399_3_gene20349	fig|278956.3.peg.4774__916__Lipopolysaccharide-related_cluster_in_Alphaproteobacteria__MsbA__Lipid_A_export_ATP-binding/permease_protein_MsbA	Cell Wall and Capsule	Gram-Negative cell wall components	Lipopolysaccharide-related cluster in Alphaproteobacteria
LD79_revised_scaffold57059_1_gene14898	fig|278956.3.peg.4776__916__Lipopolysaccharide-related_cluster_in_Alphaproteobacteria__MsbA__Lipid_A_export_ATP-binding/permease_protein_MsbA	Cell Wall and Capsule	Gram-Negative cell wall components	Lipopolysaccharide-related cluster in Alphaproteobacteria
HD1_revised_scaffold42030_1_gene52114	fig|279010.12.peg.725__1008__Ammonia_assimilation__GAT__Mannan_endo-1,4-beta-mannosidase_precursor_(EC_3.2.1.78)	Nitrogen Metabolism	-	Ammonia assimilation
HD18_revised_scaffold45295_7_gene48036	fig|279010.5.peg.1047__102__At3g21300__DAGK__Diacylglycerol_kinase,_Bacillus_type_(EC_2.7.1.107)	Predictions based on plant-prokaryote comparative analysis	-	At3g21300
HD12_revised_scaffold6794_1_gene51509	fig|279010.5.peg.3032__125__At4g10620_At3g57180_At3g47450__FIG001553__FIG001553:_Hydrolase,_HAD_subfamily_IIIA	Predictions based on plant-prokaryote comparative analysis	-	At4g10620 At3g57180 At3g47450
HD82_revised_scaffold17000_1_gene29555	fig|281689.4.peg.169__793__Glutathione-regulated_potassium-efflux_system_and_associated_functions__GC__diguanylate_cyclase_(GGDEF_domain)_with_PAS/PAC_sensor	Potassium metabolism	-	Glutathione-regulated potassium-efflux system and associated functions
HD8_revised_scaffold9469_6_gene106166	fig|281689.4.peg.306__1108__Periplasmic_Stress_Response__DegP__HtrA_protease/chaperone_protein	Stress Response	Periplasmic Stress	Periplasmic Stress Response
LD64_revised_scaffold12462_1_gene61450	fig|286604.5.peg.1027__570__Choline_and_Betaine_Uptake_and_Betaine_Biosynthesis__ChD__Choline_binding_protein_D	Stress Response	Osmotic stress	Choline and Betaine Uptake and Betaine Biosynthesis
LD45_revised_scaffold16406_1_gene33524	fig|286636.1.peg.2133__1126__Phage_integration_and_excision__Endo__Phage_endonuclease	Phages, Prophages, Transposable elements	Bacteriophage integration/excision/lysogeny	Phage integration and excision
LD4_revised_scaffold12327_1_gene8666	fig|289376.4.peg.120__989__Multidrug_Resistance_Efflux_Pumps__MacB__Macrolide_export_ATP-binding/permease_protein_MacB	Virulence	Resistance to antibiotics and toxic compounds	Multidrug Resistance Efflux Pumps
HD12_revised_scaffold4068_9_gene11221	fig|289380.14.peg.1676__125__At4g10620_At3g57180_At3g47450__UPF0348__FIG007079:_UPF0348_protein_family	Predictions based on plant-prokaryote comparative analysis	-	At4g10620 At3g57180 At3g47450
LD86_revised_scaffold73860_1_gene53611	fig|289380.14.peg.426__974__Methylglyoxal_Metabolism__Gfp__Glyoxylase_family_protein	Carbohydrates	Central carbohydrate metabolism	Methylglyoxal Metabolism
LD33_revised_scaffold51442_1_gene6317	fig|290340.10.peg.2624__943__Alpha-Amylase_locus_in_Streptocococcus__Est__putative_esterase	Carbohydrates	Polysaccharides	Alpha-Amylase locus in Streptocococcus
HV6_revised_scaffold36683_9_gene65535	fig|290402.34.peg.1265__69__At2g25870__YidA__Promiscuous_sugar_phosphatase_YidA,_haloacid_dehalogenase-like_phosphatase_family	Predictions based on plant-prokaryote comparative analysis	-	At2g25870
LD33_revised_scaffold43236_1_gene51845	fig|290633.11.peg.941__1192__Proline,_4-hydroxyproline_uptake_and_utilization__ProY__L-asparagine_permease	Amino Acids and Derivatives	Proline and 4-hydroxyproline	Proline, 4-hydroxyproline uptake and utilization
LD61_revised_scaffold9648_1_gene70491	fig|292459.1.peg.2986__607__Conserved_gene_cluster_possibly_involved_in_RNA_metabolism__RNAmet__23S_rRNA_(guanosine(2251)-2-O)-methyltransferase_(EC_2.1.1.185)_**_RlmB	Miscellaneous	Plant-Prokaryote comparative genomics	Conserved gene cluster possibly involved in RNA metabolism
HD8_revised_C1405375_1_gene183751	fig|292459.5.peg.3193__846__Hydrogenases__FeHl__Periplasmic_[FeFe]_hydrogenase_large_subunit_(EC_1.12.7.2)	Respiration	Electron donating reactions	Hydrogenases
LD21_revised_scaffold3099_7_gene40206	fig|293826.4.peg.4319__607__Conserved_gene_cluster_possibly_involved_in_RNA_metabolism__RNAmet__23S_rRNA_(guanosine(2251)-2-O)-methyltransferase_(EC_2.1.1.185)_**_RlmB	Miscellaneous	Plant-Prokaryote comparative genomics	Conserved gene cluster possibly involved in RNA metabolism
HD5_revised_scaffold999_1_gene16741	fig|293826.4.peg.4555__558__Chitin_and_N-acetylglucosamine_utilization__ABCc__N-acetyl-D-glucosamine_ABC_transporter,_substrate-binding_protein	Carbohydrates	Aminosugars	Chitin and N-acetylglucosamine utilization
HD62_revised_scaffold17217_1_gene103836	fig|293826.4.peg.662__1221__Purine_Utilization__XDFAD__Xanthine_dehydrogenase,_FAD_binding_subunit_(EC_1.17.1.4)	Nucleosides and Nucleotides	Purines	Purine Utilization
HD12_revised_scaffold171_2_gene73591	fig|293826.6.peg.107__1242__Pyruvate_metabolism_I:_anaplerotic_reactions,_PEP__MalK__Two-component_sensor_histidine_kinase,_malate_(EC_2.7.3.-)	Carbohydrates	Central carbohydrate metabolism	Pyruvate metabolism I: anaplerotic reactions, PEP
HD38_revised_scaffold20825_6_gene29177	fig|295405.11.peg.693__586__Cobalt-zinc-cadmium_resistance__FP__RND_efflux_system,_membrane_fusion_protein	Virulence	Resistance to antibiotics and toxic compounds	Cobalt-zinc-cadmium resistance
LD14_revised_scaffold2269_1_gene115370	fig|295405.3.peg.3048__1097__Pentose_phosphate_pathway__TA__Transaldolase_(EC_2.2.1.2)	Carbohydrates	Central carbohydrate metabolism	Pentose phosphate pathway
HD38_revised_scaffold30689_2_gene61346	fig|295405.3.peg.4138__421__BlaR1_Family_Regulatory_Sensor-transducer_Disambiguation__MecIfam__Transcriptional_regulator,_MecI_family	Virulence	Resistance to antibiotics and toxic compounds	BlaR1 Family Regulatory Sensor-transducer Disambiguation
LD79_revised_scaffold26885_1_gene38993	fig|297246.15.peg.2916__928__Lysine_degradation__LDC__Lysine_decarboxylase_(EC_4.1.1.18)	Amino Acids and Derivatives	Lysine, threonine, methionine, and cysteine	Lysine degradation
HD12_revised_scaffold14789_1_gene19732	fig|298386.8.peg.472__476__CBSS-316275.9.peg.382__Memb__FIG023911:_putative_membrane_protein	Clustering-based subsystems	-	CBSS-316275.9.peg.382
HD54_revised_scaffold19727_1_gene39567	fig|298653.4.peg.5618__421__BlaR1_Family_Regulatory_Sensor-transducer_Disambiguation__MecIfam__Transcriptional_regulator,_MecI_family	Virulence	Resistance to antibiotics and toxic compounds	BlaR1 Family Regulatory Sensor-transducer Disambiguation
HD1_revised_scaffold42047_1_gene50922	fig|298654.3.peg.5935__11__Respiratory_dehydrogenases_1__ND2__NADH_dehydrogenase_(EC_1.6.99.3)	Respiration	Electron donating reactions	Respiratory dehydrogenases 1
HD38_revised_scaffold15132_1_gene36870	fig|298654.4.peg.2400__1167__Plastidial_(p)ppGpp-mediated_response_in_plants__RelA/SpoT__GTP_pyrophosphokinase_(EC_2.7.6.5),_(p)ppGpp_synthetase_I	Regulation and Cell signaling	Signal transduction in Eukaryotes	Plastidial (p)ppGpp-mediated response in plants
LD85_revised_scaffold66960_2_gene14289	fig|298655.3.peg.3678__239__BEY_LIP__PdhB__Dihydrolipoamide_acetyltransferase_component_of_pyruvate_dehydrogenase_complex_(EC_2.3.1.12)	Cofactors, Vitamins, Prosthetic Groups, Pigments	Lipoic acid	BEY LIP
LD45_revised_scaffold6505_2_gene2400	fig|299768.3.peg.1328__840__Histidine_Degradation__HutT1__Histidine_transport_protein_(permease)	Amino Acids and Derivatives	Histidine Metabolism	Histidine Degradation
HD37_revised_scaffold37008_1_gene72657	fig|300852.3.peg.1615__352__rRNA_modification_bacteria__RlmN__23S_rRNA_(adenine(2503)-C(2))-methyltransferase_&_tRNA_(adenine(37)-C(2))-methyltransferase_(EC_2.1.1.192)_**_RlmN	RNA Metabolism	RNA processing and modification	rRNA modification bacteria
HD12_revised_scaffold44048_1_gene80554	fig|3055.8.peg.9716__346__Bacterial_Cell_Division__ftsH__Cell_division_protein_FtsH_(EC_3.4.24.-)	Clustering-based subsystems	-	Bacterial Cell Division
HD40_revised_scaffold72960_4_gene9589	fig|306281.4.peg.3601__515__CO2_uptake,_carboxysome__Hat__High-affnity_carbon_uptake_protein_Hat/HatR	Carbohydrates	CO2 fixation	CO2 uptake, carboxysome
LD39_revised_scaffold39369_1_gene12942	fig|309799.3.peg.952__125__At4g10620_At3g57180_At3g47450__ComEA__Late_competence_protein_ComEA,_DNA_receptor	Predictions based on plant-prokaryote comparative analysis	-	At4g10620 At3g57180 At3g47450
LD3_revised_scaffold45495_1_gene50431	fig|309801.4.peg.978__983__Molybdenum_cofactor_biosynthesis__moaA__Cyclic_pyranopterin_phosphate_synthase_(MoaA)_(EC_4.1.99.18)	Cofactors, Vitamins, Prosthetic Groups, Pigments	Folate and pterines	Molybdenum cofactor biosynthesis
HD26_revised_scaffold9975_2_gene57704	fig|309803.4.peg.1232__491__CBSS-350688.3.peg.1509__R1__FIG007959:_peptidase,_M16_family	Clustering-based subsystems	-	CBSS-350688.3.peg.1509
HD18_revised_scaffold48621_1_gene32062	fig|309807.25.peg.374__556__Cellulosome__SusD__SusD,_outer_membrane_protein	Carbohydrates	Polysaccharides	Cellulosome
HD8_revised_scaffold111899_1_gene38462	fig|311424.5.peg.1194__658__DNA_repair,_bacterial__Ogt__Methylated-DNA--protein-cysteine_methyltransferase_(EC_2.1.1.63)	DNA Metabolism	DNA repair	DNA repair, bacterial
LD54_revised_scaffold22552_1_gene33201	fig|313594.3.peg.302__515__CO2_uptake,_carboxysome__ClCP__Chloride_channel_protein	Carbohydrates	CO2 fixation	CO2 uptake, carboxysome
HD38_revised_scaffold39656_1_gene49646	fig|313595.4.peg.1358__515__CO2_uptake,_carboxysome__ClCP__Chloride_channel_protein	Carbohydrates	CO2 fixation	CO2 uptake, carboxysome
HD12_revised_scaffold44048_1_gene80563	fig|313612.3.peg.2044__390__Bacterial_hemoglobins__PHb__Putative_bacterial_haemoglobin	Stress Response	-	Bacterial hemoglobins
HD12_revised_scaffold6399_3_gene20353	fig|313627.6.peg.2646__1217__Aromatic_Amin_Catabolism__NACb__Nitrilotriacetate_monooxygenase_component_B_(EC_1.14.13.-)	Metabolism of Aromatic Compounds	-	Aromatic Amin Catabolism
LD91_revised_scaffold25844_2_gene15445	fig|314289.8.peg.3113__286__Vibrio_Core_Oligosaccharide_Biosynthesis__WavH__capsular_polysaccharide_biosynthesis_protein,_putative	Cell Wall and Capsule	Gram-Negative cell wall components	Vibrio Core Oligosaccharide Biosynthesis
HD12_revised_scaffold6794_8_gene6471	fig|314723.3.peg.70__696__EC_3.4.11.-_Aminopeptidases__3.4.11.24__Aminopeptidase_S_(Leu,_Val,_Phe,_Tyr_preference)_(EC_3.4.11.24)	Protein Metabolism	Protein degradation	EC 3.4.11.- Aminopeptidases
LD54_revised_scaffold27700_1_gene60192	fig|315730.11.peg.3094__763__Formaldehyde_assimilation:_Ribulose_monophosphate_pathway__HxlR__Transcriptional_regulator_HxlR,_formaldehyde_assimilation	Carbohydrates	One-carbon Metabolism	Formaldehyde assimilation: Ribulose monophosphate pathway
HD1_revised_scaffold42047_1_gene50935	fig|315730.5.peg.1281__886__L-Cystine_Uptake_and_Metabolism__TcyB__L-Cystine_ABC_transporter,_permease_protein_TcyB	Sulfur Metabolism	Organic sulfur assimilation	L-Cystine Uptake and Metabolism
LD64_revised_scaffold10852_1_gene28734	fig|315750.5.peg.773__991__Multidrug_Resistance,_2-protein_version_Found_in_Gram-positive_bacteria__B__Membrane_component_of_multidrug_resistance_system	Virulence	Resistance to antibiotics and toxic compounds	Multidrug Resistance, 2-protein version Found in Gram-positive bacteria
LD33_revised_scaffold30784_1_gene43178	fig|316055.14.peg.3073__679__Denitrification__NosF__Nitrous_oxide_reductase_maturation_protein_NosF_(ATPase)	Nitrogen Metabolism	-	Denitrification
HD23_revised_scaffold23822_1_gene26173	fig|316055.16.peg.974__765__Formate_hydrogenase__FH3__Hydrogenase-4_component_B	Respiration	-	Formate hydrogenase
HD12_revised_scaffold4068_8_gene91094	fig|316056.16.peg.1060__1031__Anaerobic_Aromatic_Degredation_(benzoate)__BadF__Benzoyl-CoA_reductase_subunit_A_(EC_1.3.7.8)	Metabolism of Aromatic Compounds	Anaerobic degradation of aromatic compounds	Anaerobic Aromatic Degredation (benzoate)
HD8_revised_scaffold86844_2_gene191148	fig|316057.6.peg.1589__1031__Anaerobic_Aromatic_Degredation_(benzoate)__BadF__Benzoyl-CoA_reductase_subunit_BadF_(EC_1.3.99.15)	Metabolism of Aromatic Compounds	Anaerobic degradation of aromatic compounds	Anaerobic Aromatic Degredation (benzoate)
HD8_revised_scaffold103798_2_gene15855	fig|316067.3.peg.3082__752__Flagellum__fliK__hypothetical_protein_formerly_called_flagellar_hook-length_control_protein_FliK	Motility and Chemotaxis	Flagellar motility in Prokaryota	Flagellum
HD8_revised_scaffold43858_1_gene71552	fig|316273.3.peg.4147__639__D-galactarate,_D-glucarate_and_D-glycerate_catabolism__SdaR__Sugar_diacid_utilization_regulator_SdaR	Carbohydrates	Monosaccharides	D-galactarate, D-glucarate and D-glycerate catabolism
LD91_revised_scaffold3397_1_gene5125	fig|316278.3.peg.627__1268__At1g14345__COG1399__FIG057954:_metal-binding,_possibly_nucleic_acid-binding_protein	Predictions based on plant-prokaryote comparative analysis	-	At1g14345
HD19_revised_scaffold15632_3_gene25010	fig|317936.3.peg.594__141__Synechocystis_experimental__slr1235__Possible_alpha/beta_hydrolase_superfamily,_slr1235_homolog	Miscellaneous	Plant-Prokaryote comparative genomics	Synechocystis experimental
LD39_revised_scaffold38742_1_gene231	fig|318586.5.peg.5093__570__Choline_and_Betaine_Uptake_and_Betaine_Biosynthesis__ProV__L-proline_glycine_betaine_ABC_transport_system_permease_protein_ProV_(TC_3.A.1.12.1)	Stress Response	Osmotic stress	Choline and Betaine Uptake and Betaine Biosynthesis
HD47_revised_scaffold36879_1_gene99671	fig|319701.6.peg.1774__121__Streptococcus_pyogenes_Virulome__SpeB__Strepotococcal_cysteine_protease_(Streptopain)_(EC_3.4.22.10)_/_Streptococcal_pyrogenic_exotoxin_B_(SpeB)	Virulence, Disease and Defense	-	Streptococcus pyogenes Virulome
HD40_revised_scaffold53862_1_gene2041	fig|319701.6.peg.1774__121__Streptococcus_pyogenes_Virulome__SpeB__Strepotococcal_cysteine_protease_(Streptopain)_(EC_3.4.22.10)_/_Streptococcal_pyrogenic_exotoxin_B_(SpeB)	Virulence, Disease and Defense	-	Streptococcus pyogenes Virulome
HD37_revised_scaffold34092_2_gene89633	fig|320771.5.peg.531__779__Galactosylceramide_and_Sulfatide_metabolism__bGS__Beta-galactosidase_(EC_3.2.1.23)	Sulfur Metabolism	-	Galactosylceramide and Sulfatide metabolism
LD86_revised_scaffold76519_1_gene79724	fig|322159.7.peg.362__678__Dehydrogenase_complexes__AUB__CBS_domain_protein_*_frameshift	Carbohydrates	Central carbohydrate metabolism	Dehydrogenase complexes
LD64_revised_scaffold1673_1_gene28915	fig|322159.8.peg.1049__1276__Raj_MurE__AmiA__N-acetylmuramoyl-L-alanine_amidase_(EC_3.5.1.28)	Cell Wall and Capsule	-	Raj MurE
HD37_revised_scaffold51506_1_gene10751	fig|322710.5.peg.2405__72__Siderophore_Pyoverdine__FpvR__Antisigma_transmembrane_sensor_FpvR	Iron acquisition and metabolism	Siderophores	Siderophore Pyoverdine
LD45_revised_scaffold12890_3_gene32384	fig|323097.6.peg.3783__235__Two_cell_division_clusters_relating_to_chromosome_partitioning__Smc__Chromosome_partition_protein_smc	Cell Division and Cell Cycle	-	Two cell division clusters relating to chromosome partitioning
HD35_revised_scaffold332_1_gene82003	fig|323261.3.peg.1817__221__Transport_of_Zinc__ZnuA__Zinc_ABC_transporter,_substrate-binding_protein_ZnuA	Membrane Transport	-	Transport of Zinc
LD33_revised_scaffold48707_1_gene44329	fig|324602.4.peg.1306__636__D-Sorbitol(D-Glucitol)_and_L-Sorbose_Utilization__SrlR__Sorbitol_operon_transcription_regulator	Carbohydrates	Monosaccharides	D-Sorbitol(D-Glucitol) and L-Sorbose Utilization
HD8_revised_scaffold20479_1_gene47829	fig|324602.8.peg.94__457__CBSS-258594.1.peg.3339__R3__Glycosyltransferase	Clustering-based subsystems	Biosynthesis of galactoglycans and related lipopolysacharides	CBSS-258594.1.peg.3339
HD12_revised_scaffold2528_3_gene29300	fig|326423.5.peg.3315__554__Cell_envelope-associated_LytR-CpsA-Psr_transcriptional_attenuators__F2__Cell_envelope-associated_transcriptional_attenuator_LytR-CpsA-Psr,_subfamily_F2_(as_in_PMID19099556)	Regulation and Cell signaling	-	Cell envelope-associated LytR-CpsA-Psr transcriptional attenuators
LD85_revised_scaffold29775_3_gene75698	fig|326426.4.peg.415__664__DNA_repair,_bacterial_RecFOR_pathway__Ssb__Single-stranded_DNA-binding_protein	DNA Metabolism	DNA repair	DNA repair, bacterial RecFOR pathway
HD82_revised_scaffold26011_1_gene2968	fig|326427.3.peg.139__10__At1g26220_At1g32070__sll0284__Bipolar_DNA_helicase_HerA	Predictions based on plant-prokaryote comparative analysis	-	At1g26220 At1g32070
LD47_revised_scaffold10_1_gene94323	fig|326427.4.peg.3635__757__Flavohaemoglobin__Cl__H(+)/Cl(-)_exchange_transporter_ClcA	Stress Response	-	Flavohaemoglobin
HD1_revised_scaffold42047_1_gene50975	fig|326442.4.peg.1115__218__Transport_of_Manganese__newMT__Predicted_manganese_transporter,_11_TMS	Membrane Transport	-	Transport of Manganese
HD51_revised_scaffold48044_1_gene68380	fig|329381.8.peg.117__1116__Phage_DNA_methyltransferases__Dmt-II-5mC__Type_II,_5-methyl-cytosine_DNA_methyltransferase	Phages, Prophages, Transposable elements, Plasmids	Phages, Prophages	Phage DNA methyltransferases
LD33_revised_scaffold33006_1_gene70840	fig|331111.3.peg.3614__1237__Pyrimidine_utilization__RutR__Transcriptional_regulator_RutR_of_pyrimidine_catabolism_(TetR_family)	Nucleosides and Nucleotides	Pyrimidines	Pyrimidine utilization
HD12_revised_scaffold14789_1_gene19746	fig|333849.6.peg.835__815__Gram_Positive_Competence__entNuc__DNA-entry_nuclease_(Competence-specific_nuclease)_(EC_3.1.30.-)	DNA Metabolism	DNA uptake, competence	Gram Positive Competence
LD78_revised_scaffold4013_2_gene22283	fig|334802.4.peg.231__1248__Arsenic_resistance__ACR3__Arsenical-resistance_protein_ACR3	Virulence	Resistance to antibiotics and toxic compounds	Arsenic resistance
HD8_revised_scaffold81787_1_gene185138	fig|335541.7.peg.2741__522__CRISPR-associated_cluster__F1__DUF324_domain-containing_protein	DNA Metabolism	CRISPs	CRISPR-associated cluster
LD93_revised_scaffold11564_3_gene51765	fig|335543.9.peg.2221__1133__Phage_tail_proteins_2__Min__Phage_minor_tail_protein_*Phage_minor_tail_protein_L	Phages, Prophages, Transposable elements, Plasmids	Phages, Prophages	Phage tail proteins 2
LD45_revised_scaffold15369_1_gene22436	fig|335543.9.peg.2221__1133__Phage_tail_proteins_2__Min__Phage_minor_tail_protein_*Phage_minor_tail_protein_L	Phages, Prophages, Transposable elements, Plasmids	Phages, Prophages	Phage tail proteins 2
LD45_revised_scaffold15681_1_gene40092	fig|335543.9.peg.2223__1132__Phage_tail_fiber_proteins__TFP__Phage_tail_fiber_protein_*Phage_host_specificity_protein_J	Phages, Prophages, Transposable elements, Plasmids	Phages, Prophages	Phage tail fiber proteins
LD45_revised_scaffold15369_1_gene22438	fig|335543.9.peg.2223__1132__Phage_tail_fiber_proteins__TFP__Phage_tail_fiber_protein_*Phage_host_specificity_protein_J	Phages, Prophages, Transposable elements, Plasmids	Phages, Prophages	Phage tail fiber proteins
LD17_revised_scaffold41125_1_gene71982	fig|335543.9.peg.2223__1132__Phage_tail_fiber_proteins__TFP__Phage_tail_fiber_protein_*Phage_host_specificity_protein_J	Phages, Prophages, Transposable elements, Plasmids	Phages, Prophages	Phage tail fiber proteins
LD47_revised_scaffold6602_1_gene110300	fig|335543.9.peg.3254__229__B12_duf71__BtuF__Vitamin_B12_ABC_transporter,_B12-binding_component_BtuF_/_Adenosylcobinamide_amidohydrolase_(EC_3.5.1.90)	Cofactors, Vitamins, Prosthetic Groups, Pigments	Tetrapyrroles	B12 duf71
LV13_revised_scaffold19732_1_gene25658	fig|335543.9.peg.3254__229__B12_duf71__BtuF__Vitamin_B12_ABC_transporter,_B12-binding_component_BtuF_/_Adenosylcobinamide_amidohydrolase_(EC_3.5.1.90)	Cofactors, Vitamins, Prosthetic Groups, Pigments	Tetrapyrroles	B12 duf71
HD5_revised_C721764_1_gene29328	fig|338966.9.peg.908__32__Ribosome_SSU_bacterial__S1p__SSU_ribosomal_protein_S1p	Protein Metabolism	Protein biosynthesis	Ribosome SSU bacterial
LD52_revised_scaffold6304_1_gene69497	fig|338969.11.peg.2402__989__Multidrug_Resistance_Efflux_Pumps__AcrR__Transcriptional_regulator,_AcrR_family	Virulence	Resistance to antibiotics and toxic compounds	Multidrug Resistance Efflux Pumps
HD12_revised_scaffold2528_3_gene29298	fig|339860.6.peg.425__291__WhiB_and_WhiB-type_regulatory_proteins___R1__Glycosyl_transferase,_family_2	Regulation and Cell signaling	-	WhiB and WhiB-type regulatory proteins_
LD48_revised_scaffold22246_1_gene44776	fig|340100.3.peg.3461__323__cAMP_signaling_in_bacteria__ArsR__Transcriptional_regulator,_ArsR_family	Regulation and Cell signaling	-	cAMP signaling in bacteria
HD26_revised_scaffold33621_1_gene20254	fig|340100.3.peg.685__751__Flagellar_motility__RpoN__RNA_polymerase_sigma-54_factor_RpoN	Motility and Chemotaxis	Flagellar motility in Prokaryota	Flagellar motility
HD8_revised_scaffold81787_1_gene185124	fig|344609.3.peg.3038__673__DNA-replication__dnaT__Primosomal_protein_I	DNA Metabolism	DNA replication	DNA-replication
LD85_revised_scaffold4153_4_gene42388	fig|349102.4.peg.197__306__YgfZ__GshA__Glutamate--cysteine_ligase_(EC_6.3.2.2)	Cofactors, Vitamins, Prosthetic Groups, Pigments	Folate and pterines	YgfZ
HD16_revised_scaffold55316_1_gene5161	fig|349161.4.peg.122__101__Sporulation_Cluster__SpoIIE__Stage_II_sporulation_serine_phosphatase_for_sigma-F_activation_(SpoIIE)	Dormancy and Sporulation	-	Sporulation Cluster
HD1_revised_scaffold42030_1_gene52142	fig|349161.6.peg.3032__1222__Purine_conversions__addeam__Adenine_deaminase_(EC_3.5.4.2)	Nucleosides and Nucleotides	Purines	Purine conversions
HD37_revised_scaffold37008_1_gene72658	fig|349521.8.peg.2109__1109__Periplasmic_disulfide_interchange__DsbD__Cytochrome_c-type_biogenesis_protein_DsbD,_protein-disulfide_reductase_(EC_1.8.1.8)	Protein Metabolism	Protein folding	Periplasmic disulfide interchange
LD61_revised_scaffold15536_2_gene50959	fig|349741.3.peg.101__959__Metabolite_repair__YeaO__FIG016027:_protein_of_unknown_function_YeaO	Miscellaneous	-	Metabolite repair
HD35_revised_scaffold27990_2_gene139515	fig|349741.3.peg.1765__779__Galactosylceramide_and_Sulfatide_metabolism__bGS__Beta-galactosidase_(EC_3.2.1.23)	Sulfur Metabolism	-	Galactosylceramide and Sulfatide metabolism
LD33_revised_scaffold30658_9_gene34486	fig|349965.3.peg.3137__835__Hexose_Phosphate_Uptake_System__UhpB__Sensor_histidine_protein_kinase_UhpB,_glucose-6-phosphate_specific_(EC_2.7.13.3)	Carbohydrates	Monosaccharides	Hexose Phosphate Uptake System
HD37_revised_scaffold37008_1_gene72650	fig|349967.3.peg.2013__1008__Ammonia_assimilation__NRI__Nitrogen_regulation_protein_NR(I)	Nitrogen Metabolism	-	Ammonia assimilation
HD37_revised_scaffold49239_1_gene46659	fig|350688.3.peg.624__793__Glutathione-regulated_potassium-efflux_system_and_associated_functions__OsmS__OsmC/Ohr_family_protein	Potassium metabolism	-	Glutathione-regulated potassium-efflux system and associated functions
HD23_revised_scaffold41143_2_gene15200	fig|350688.3.peg.667__477__A_TRAP_transporter_and_a_hypothetical__Duf1850__DUF1850_domain-containing_protein	Membrane Transport	TRAP transporters	A TRAP transporter and a hypothetical
HD38_revised_scaffold14683_2_gene49678	fig|350688.3.peg.729__306__YgfZ__Fd__Ferredoxin-like_domain_fused_to_nitroreductase-like_domain	Cofactors, Vitamins, Prosthetic Groups, Pigments	Folate and pterines	YgfZ
LD14_revised_scaffold24307_1_gene4517	fig|350701.6.peg.966__914__Lipopolysaccharide_assembly__YrbC__Uncharacterized_ABC_transporter,_auxiliary_component_YrbC	Cell Wall and Capsule	Gram-Negative cell wall components	Lipopolysaccharide assembly
HD38_revised_scaffold16663_1_gene26746	fig|350703.9.peg.1199__355__Bacterial_Chemotaxis__tsr__Methyl-accepting_chemotaxis_protein_I_(serine_chemoreceptor_protein)	Motility and Chemotaxis	-	Bacterial Chemotaxis
HD38_revised_scaffold15067_1_gene1265	fig|351348.5.peg.3418__692__Dissimilatory_nitrite_reductase__NirJ__Heme_d1_biosynthesis_protein_NirJ	Nitrogen Metabolism	-	Dissimilatory nitrite reductase
HD12_revised_scaffold4387_4_gene106424	fig|351605.4.peg.3912__199__Ton_and_Tol_transport_systems__TolA__hypothetical_protein	Membrane Transport	-	Ton and Tol transport systems
HD38_revised_scaffold21375_2_gene74940	fig|351605.6.peg.806__752__Flagellum__fliK__hypothetical_protein_formerly_called_flagellar_hook-length_control_protein_FliK	Motility and Chemotaxis	Flagellar motility in Prokaryota	Flagellum
HD82_revised_C329639_1_gene11976	fig|351627.4.peg.1350__1175__Polyamine_Metabolism__Reg3__hypothetical_protein	Amino Acids and Derivatives	Arginine; urea cycle, polyamines	Polyamine Metabolism
HD12_revised_scaffold4068_9_gene11226	fig|351627.4.peg.2242__10__At1g26220_At1g32070__XerD__Site-specific_tyrosine_recombinase_XerD	Predictions based on plant-prokaryote comparative analysis	-	At1g26220 At1g32070
HD1_revised_scaffold42030_1_gene52041	fig|351627.4.peg.944__1238__Aromatic_amino_acid_interconversions_with_aryl_acids__ACTL__ACT-domain-containing_protein,_predicted_allosteric_regulator_of_homoserine_dehydrogenase	Amino Acids and Derivatives	Aromatic amino acids and derivatives	Aromatic amino acid interconversions with aryl acids
HD8_revised_scaffold103173_1_gene149307	fig|351627.8.peg.895__658__DNA_repair,_bacterial__RadC__DNA_repair_protein_RadC	DNA Metabolism	DNA repair	DNA repair, bacterial
LD33_revised_scaffold52019_2_gene16960	fig|357808.3.peg.3362__585__Cobalamin_synthesis__CbiP-r__Putative_amidotransferase_similar_to_cobyric_acid_synthase	Cofactors, Vitamins, Prosthetic Groups, Pigments	Tetrapyrroles	Cobalamin synthesis
LD7_revised_C939638_1_gene17689	fig|357809.4.peg.1311__125__At4g10620_At3g57180_At3g47450__UPF0348__FIG007079:_UPF0348_protein_family	Predictions based on plant-prokaryote comparative analysis	-	At4g10620 At3g57180 At3g47450
HD5_revised_scaffold12116_3_gene16695	fig|357809.4.peg.1446__263__Universal_GTPases__EngC2__Probable_GTPase_related_to_EngC	Protein Metabolism	Protein biosynthesis	Universal GTPases
HV6_revised_scaffold10963_13_gene28907	fig|357809.4.peg.157__102__At3g21300__TrmA__23S_rRNA_(uracil(1939)-C(5))-methyltransferase_(EC_2.1.1.190)_**_LSU_rRNA_m(5)U1939	Predictions based on plant-prokaryote comparative analysis	-	At3g21300
LD21_revised_scaffold6183_11_gene55819	fig|357809.4.peg.1635__102__At3g21300__TrmA__RNA_methyltransferase,_TrmA_family	Predictions based on plant-prokaryote comparative analysis	-	At3g21300
HD1_revised_scaffold42047_1_gene50979	fig|357809.4.peg.1751__771__Fructose_utilization__PtsI__Phosphoenolpyruvate-protein_phosphotransferase_of_PTS_system_(EC_2.7.3.9)	Carbohydrates	Monosaccharides	Fructose utilization
HD1_revised_scaffold42047_1_gene51063	fig|357809.4.peg.2437__941__Maltose_and_Maltodextrin_Utilization__MalR__Transcriptional_regulator_of_beta-glucosides_utilization,_LacI_family	Carbohydrates	Di- and oligosaccharides	Maltose and Maltodextrin Utilization
HD12_revised_scaffold2669_7_gene12391	fig|357809.4.peg.2577__105__Sporulation_draft__V-B__FIG006789:_Stage_V_sporulation_protein	Dormancy and Sporulation	-	Sporulation draft
HD37_revised_scaffold187_2_gene77801	fig|357809.4.peg.2706__635__D-Galacturonate_and_D-Glucuronate_Utilization__PelB__Polygalacturonase_(EC_3.2.1.15)	Carbohydrates	Monosaccharides	D-Galacturonate and D-Glucuronate Utilization
HD19_revised_scaffold19045_1_gene24164	fig|357809.4.peg.3090__1175__Polyamine_Metabolism__SSAT__Spermidine_N1-acetyltransferase_(EC_2.3.1.57)	Amino Acids and Derivatives	Arginine; urea cycle, polyamines	Polyamine Metabolism
HD12_revised_scaffold4068_24_gene106654	fig|357809.4.peg.3284__607__Conserved_gene_cluster_possibly_involved_in_RNA_metabolism__RNAmet__23S_rRNA_(guanosine(2251)-2-O)-methyltransferase_(EC_2.1.1.185)_**_RlmB	Miscellaneous	Plant-Prokaryote comparative genomics	Conserved gene cluster possibly involved in RNA metabolism
LD94_revised_scaffold42883_1_gene21400	fig|357809.4.peg.3426__554__Cell_envelope-associated_LytR-CpsA-Psr_transcriptional_attenuators__Atl__Bifunctional_autolysin_Atl_/_N-acetylmuramoyl-L-alanine_amidase_(EC_3.5.1.28)/_endo-beta-N-acetylglucosaminidase_(EC_3.2.1.96)	Regulation and Cell signaling	-	Cell envelope-associated LytR-CpsA-Psr transcriptional attenuators
LD4_revised_scaffold34_1_gene67340	fig|357809.4.peg.425__676__De_Novo_Pyrimidine_Synthesis__uraA__Uracil_permease	Nucleosides and Nucleotides	Pyrimidines	De Novo Pyrimidine Synthesis
HD12_revised_scaffold44048_1_gene80547	fig|357809.8.peg.142__1275__RP_Bacterial_Cell_Division__DivIC__Cell_division_protein_DivIC_(FtsB),_stabilizes_FtsL_against_RasP_cleavage	Clustering-based subsystems	-	RP Bacterial Cell Division
HD8_revised_scaffold106244_1_gene137461	fig|357809.8.peg.2164__746__FeFe_hydrogenase_maturation__hydE__[FeFe]-hydrogenase_maturation_protein_HydE	Protein Metabolism	Protein processing and modification	FeFe hydrogenase maturation
HD16_revised_scaffold55316_1_gene5151	fig|357809.8.peg.2447__224__Trehalose_Biosynthesis__AmyA__Alpha-amylase_(EC_3.2.1.1)	Carbohydrates	Di- and oligosaccharides	Trehalose Biosynthesis
HD12_revised_scaffold2669_7_gene12326	fig|357809.8.peg.2575__1275__RP_Bacterial_Cell_Division__ftsQ__Cell_division_protein_FtsQ	Clustering-based subsystems	-	RP Bacterial Cell Division
HD12_revised_scaffold4068_5_gene51225	fig|357809.8.peg.2589__455__A_Gram-positive_cluster_that_relates_ribosomal_protein_L28P_to_a_set_of_uncharacterized_proteins__R4__Serine/threonine_protein_kinase_PrkC,_regulator_of_stationary_phase	Clustering-based subsystems	Ribosomal Protein L28P relates to a set of uncharacterized proteins	A Gram-positive cluster that relates ribosomal protein L28P to a set of uncharacterized proteins
HD12_revised_scaffold14789_1_gene19700	fig|357809.8.peg.787__494__CBSS-393121.3.peg.2760__R1__hypothetical_protein_BH3604	Clustering-based subsystems	Protein export?	CBSS-393121.3.peg.2760
LD33_revised_scaffold46632_3_gene62008	fig|357809.8.peg.926__969__Methionine_Biosynthesis__SAHCN__5-methylthioadenosine_nucleosidase_(EC_3.2.2.16)_@_S-adenosylhomocysteine_nucleosidase_(EC_3.2.2.9)	Amino Acids and Derivatives	Lysine, threonine, methionine, and cysteine	Methionine Biosynthesis
LD45_revised_scaffold16879_1_gene50103	fig|360105.6.peg.1741__1062__Nitrosative_stress__NnrS__NnrS_protein_involved_in_response_to_NO	Nitrogen Metabolism	-	Nitrosative stress
LD82_revised_scaffold28469_6_gene21440	fig|360105.8.peg.1721__1275__RP_Bacterial_Cell_Division__ftsX__Cell_division_protein_FtsX	Clustering-based subsystems	-	RP Bacterial Cell Division
HD12_revised_scaffold4068_24_gene106661	fig|360911.3.peg.2689__673__DNA-replication__ruvB__ATPase,_AAA_family	DNA Metabolism	DNA replication	DNA-replication
LD64_revised_scaffold606_1_gene65778	fig|362948.14.peg.1483__748__Fermentations:_Lactate__ADH__Alcohol_dehydrogenase_(EC_1.1.1.1)	Carbohydrates	Fermentation	Fermentations: Lactate
LD53_revised_scaffold3688_1_gene61394	fig|362948.14.peg.1626__570__Choline_and_Betaine_Uptake_and_Betaine_Biosynthesis__ChA__Choline_binding_protein_A	Stress Response	Osmotic stress	Choline and Betaine Uptake and Betaine Biosynthesis
LD85_revised_scaffold31479_1_gene45682	fig|362948.14.peg.1626__570__Choline_and_Betaine_Uptake_and_Betaine_Biosynthesis__ChA__Choline_binding_protein_A	Stress Response	Osmotic stress	Choline and Betaine Uptake and Betaine Biosynthesis
LD33_revised_scaffold44100_1_gene52372	fig|362948.14.peg.1626__570__Choline_and_Betaine_Uptake_and_Betaine_Biosynthesis__ChA__Choline_binding_protein_A	Stress Response	Osmotic stress	Choline and Betaine Uptake and Betaine Biosynthesis
LD45_revised_C575279_1_gene28434	fig|362948.14.peg.992__12__Restriction-Modification_System__HsdS__Type_I_restriction-modification_system,_specificity_subunit_S_(EC_3.1.21.3)	DNA Metabolism	-	Restriction-Modification System
LD86_revised_C992446_1_gene29354	fig|362948.14.peg.995__12__Restriction-Modification_System__HsdS__Type_I_restriction-modification_system,_specificity_subunit_S_(EC_3.1.21.3)	DNA Metabolism	-	Restriction-Modification System
HD8_revised_scaffold59356_1_gene58793	fig|362976.10.peg.1220__1221__Purine_Utilization__UXP__Uracil-xanthine_permease	Nucleosides and Nucleotides	Purines	Purine Utilization
LD33_revised_scaffold30658_12_gene14171	fig|367928.5.peg.1116__941__Maltose_and_Maltodextrin_Utilization__maa__Maltose_O-acetyltransferase_(EC_2.3.1.79)	Carbohydrates	Di- and oligosaccharides	Maltose and Maltodextrin Utilization
LD33_revised_scaffold52019_2_gene16962	fig|367928.5.peg.121__673__DNA-replication__dnaB__Replicative_DNA_helicase_(DnaB)_(EC_3.6.4.12)	DNA Metabolism	DNA replication	DNA-replication
LD85_revised_scaffold4153_7_gene73242	fig|367928.5.peg.1274__301__Xylose_utilization__xyl3__Beta-xylosidase_(EC_3.2.1.37)	Carbohydrates	Monosaccharides	Xylose utilization
LD38_revised_scaffold44395_1_gene12220	fig|367928.5.peg.130__800__Glycerol_and_Glycerol-3-phosphate_Uptake_and_Utilization__UdpQ__Glycerophosphoryl_diester_phosphodiesterase_(EC_3.1.4.46)	Carbohydrates	Sugar alcohols	Glycerol and Glycerol-3-phosphate Uptake and Utilization
LD45_revised_scaffold25028_1_gene55231	fig|367928.5.peg.1363__558__Chitin_and_N-acetylglucosamine_utilization__ABCb2__N-acetyl-D-glucosamine_ABC_transporter,_permease_protein_2	Carbohydrates	Aminosugars	Chitin and N-acetylglucosamine utilization
LD33_revised_scaffold13425_4_gene57953	fig|367928.5.peg.1475__769__Fructooligosaccharides(FOS)_and_Raffinose_Utilization__MsmG__Multiple_sugar_ABC_transporter,_membrane-spanning_permease_protein_MsmG	Carbohydrates	Di- and oligosaccharides	Fructooligosaccharides(FOS) and Raffinose Utilization
LD33_revised_scaffold47591_1_gene21396	fig|367928.5.peg.1557__1097__Pentose_phosphate_pathway__PRPPS__Ribose-phosphate_pyrophosphokinase_(EC_2.7.6.1)	Carbohydrates	Central carbohydrate metabolism	Pentose phosphate pathway
LD33_revised_scaffold48920_2_gene4160	fig|367928.5.peg.1560__647__D-ribose_utilization__RbsR__Ribose_operon_repressor	Carbohydrates	Monosaccharides	D-ribose utilization
LD33_revised_scaffold47591_1_gene21401	fig|367928.5.peg.1560__647__D-ribose_utilization__RbsR__Ribose_operon_repressor	Carbohydrates	Monosaccharides	D-ribose utilization
LD85_revised_scaffold9961_2_gene29821	fig|367928.5.peg.1597__941__Maltose_and_Maltodextrin_Utilization__MalR__Maltose_operon_transcriptional_repressor_MalR,_LacI_family	Carbohydrates	Di- and oligosaccharides	Maltose and Maltodextrin Utilization
LD33_revised_scaffold51637_1_gene14745	fig|367928.5.peg.1597__941__Maltose_and_Maltodextrin_Utilization__MalR__Maltose_operon_transcriptional_repressor_MalR,_LacI_family	Carbohydrates	Di- and oligosaccharides	Maltose and Maltodextrin Utilization
LD33_revised_scaffold50778_7_gene56297	fig|367928.5.peg.1627__769__Fructooligosaccharides(FOS)_and_Raffinose_Utilization__MsmR__MSM_(multiple_sugar_metabolism)_operon_regulatory_protein	Carbohydrates	Di- and oligosaccharides	Fructooligosaccharides(FOS) and Raffinose Utilization
LD85_revised_scaffold21171_2_gene111593	fig|367928.5.peg.1630__941__Maltose_and_Maltodextrin_Utilization__PL__Pullulanase_(EC_3.2.1.41)	Carbohydrates	Di- and oligosaccharides	Maltose and Maltodextrin Utilization
LD33_revised_scaffold50778_4_gene1869	fig|367928.5.peg.1632__635__D-Galacturonate_and_D-Glucuronate_Utilization__Agu__Alpha-glucosidase_(EC_3.2.1.20)	Carbohydrates	Monosaccharides	D-Galacturonate and D-Glucuronate Utilization
LD5_revised_scaffold23745_1_gene9875	fig|367928.5.peg.1649__769__Fructooligosaccharides(FOS)_and_Raffinose_Utilization__MsmE__Predicted_galactosides_ABC_transporter,_substrate-binding_protein_AgaE	Carbohydrates	Di- and oligosaccharides	Fructooligosaccharides(FOS) and Raffinose Utilization
LD33_revised_scaffold50776_4_gene51672	fig|367928.5.peg.1661__941__Maltose_and_Maltodextrin_Utilization__MalR__Maltose_operon_transcriptional_repressor_MalR,_LacI_family	Carbohydrates	Di- and oligosaccharides	Maltose and Maltodextrin Utilization
LD85_revised_C975940_1_gene54282	fig|367928.5.peg.1661__941__Maltose_and_Maltodextrin_Utilization__MalR__Maltose_operon_transcriptional_repressor_MalR,_LacI_family	Carbohydrates	Di- and oligosaccharides	Maltose and Maltodextrin Utilization
LD33_revised_scaffold48707_2_gene55253	fig|367928.5.peg.1676__769__Fructooligosaccharides(FOS)_and_Raffinose_Utilization__BG__beta-glucosidase_(EC_3.2.1.21)	Carbohydrates	Di- and oligosaccharides	Fructooligosaccharides(FOS) and Raffinose Utilization
LD61_revised_scaffold24739_1_gene35117	fig|367928.5.peg.1696__769__Fructooligosaccharides(FOS)_and_Raffinose_Utilization__BG__beta-glucosidase_(EC_3.2.1.21)	Carbohydrates	Di- and oligosaccharides	Fructooligosaccharides(FOS) and Raffinose Utilization
LD38_revised_scaffold53396_1_gene24710	fig|367928.5.peg.1697__769__Fructooligosaccharides(FOS)_and_Raffinose_Utilization__BG__beta-glucosidase_(EC_3.2.1.21)	Carbohydrates	Di- and oligosaccharides	Fructooligosaccharides(FOS) and Raffinose Utilization
LD33_revised_C839453_1_gene47258	fig|367928.5.peg.1697__769__Fructooligosaccharides(FOS)_and_Raffinose_Utilization__BG__beta-glucosidase_(EC_3.2.1.21)	Carbohydrates	Di- and oligosaccharides	Fructooligosaccharides(FOS) and Raffinose Utilization
LD33_revised_scaffold49816_3_gene28329	fig|367928.5.peg.324__305__YebC__FIG000605__FIG000605:_protein_co-occurring_with_transport_systems_(COG1739)	Miscellaneous	Plant-Prokaryote comparative genomics	YebC
LD33_revised_scaffold51775_1_gene25427	fig|367928.5.peg.395__885__L-Arabinose_utilization__AraJ__Protein_AraJ_precursor	Carbohydrates	Monosaccharides	L-Arabinose utilization
LD33_revised_scaffold44210_1_gene40084	fig|367928.5.peg.559__457__CBSS-258594.1.peg.3339__R3__Glycosyltransferase	Clustering-based subsystems	Biosynthesis of galactoglycans and related lipopolysacharides	CBSS-258594.1.peg.3339
LD33_revised_scaffold52020_1_gene54370	fig|367928.5.peg.666__1097__Pentose_phosphate_pathway__PGLe__6-phosphogluconolactonase_(EC_3.1.1.31),_eukaryotic_type	Carbohydrates	Central carbohydrate metabolism	Pentose phosphate pathway
LD85_revised_scaffold66836_2_gene85022	fig|367928.5.peg.819__310__YjeE__YjeF-N__NAD(P)H-hydrate_epimerase_(EC_5.1.99.6)_/_ADP-dependent_(S)-NAD(P)H-hydrate_dehydratase_(EC_4.2.1.136)	Cell Wall and Capsule	-	YjeE
LD38_revised_scaffold27312_1_gene101005	fig|367928.5.peg.844__604__Competence_or_DNA_damage-inducible_protein_CinA_and_related_protein_families__2.7.8.5__CDP-diacylglycerol--glycerol-3-phosphate_3-phosphatidyltransferase_(EC_2.7.8.5)	Miscellaneous	Plant-Prokaryote comparative genomics	Competence or DNA damage-inducible protein CinA and related protein families
LD85_revised_scaffold27209_3_gene104088	fig|367928.6.peg.1105__1044__NAD_and_NADP_cofactor_biosynthesis_global__CinA_S__Nicotinamide-nucleotide_amidase_(EC_3.5.1.42)	Cofactors, Vitamins, Prosthetic Groups, Pigments	NAD and NADP	NAD and NADP cofactor biosynthesis global
HD8_revised_scaffold9469_6_gene106154	fig|368408.5.peg.1769__171__Test_Pyridoxin_B6__PdxU2__Substrate-specific_component_PdxU2_of_predicted_pyridoxin-related_ECF_transporter	Cofactors, Vitamins, Prosthetic Groups, Pigments	Pyridoxine	Test Pyridoxin B6
HD8_revised_scaffold81787_1_gene185140	fig|369723.3.peg.999__522__CRISPR-associated_cluster__S2__CRISPR-associated_protein,_Csm2_family	DNA Metabolism	CRISPs	CRISPR-associated cluster
LD54_revised_C679607_1_gene900	fig|3702.7.peg.10543__838__Histidine_Biosynthesis__HisF__Imidazoleglycerol-phosphate_dehydratase_(EC_4.2.1.19)_*_HISN5B	Amino Acids and Derivatives	Histidine Metabolism	Histidine Biosynthesis
LD60_revised_scaffold23900_1_gene9238	fig|3702.7.peg.10543__838__Histidine_Biosynthesis__HisF__Imidazoleglycerol-phosphate_dehydratase_(EC_4.2.1.19)_*_HISN5B	Amino Acids and Derivatives	Histidine Metabolism	Histidine Biosynthesis
HD18_revised_scaffold19950_1_gene76930	fig|370553.3.peg.1140__1126__Phage_integration_and_excision__Recomb__Site-specific_recombinase	Phages, Prophages, Transposable elements	Bacteriophage integration/excision/lysogeny	Phage integration and excision
LD52_revised_scaffold51874_1_gene135651	fig|374927.4.peg.1250__19__Ribonuclease_H__RNaseHI__Ribonuclease_HI_(EC_3.1.26.4)	RNA Metabolism	RNA processing and modification	Ribonuclease H
LD19_revised_scaffold19939_1_gene5180	fig|374927.4.peg.207__1275__RP_Bacterial_Cell_Division__mraZ__Cell_division_protein_MraZ	Clustering-based subsystems	-	RP Bacterial Cell Division
LD60_revised_scaffold8491_1_gene41003	fig|374927.4.peg.423__661__DNA_repair,_bacterial_RecBCD_pathway__RecC__Exodeoxyribonuclease_V_gamma_chain_(EC_3.1.11.5)_**_RecC	DNA Metabolism	DNA repair	DNA repair, bacterial RecBCD pathway
LD93_revised_scaffold30510_1_gene59361	fig|374928.4.peg.1382__1102__Peptidoglycan_Biosynthesis__PBP__Multimodular_transpeptidase-transglycosylase_(EC_2.4.1.129)_(EC_3.4.-.-)	Cell Wall and Capsule	-	Peptidoglycan Biosynthesis
LD60_revised_scaffold13646_2_gene63061	fig|374928.4.peg.413__654__DNA_processing_cluster__dnaX__DNA_polymerase_III_subunits_gamma_and_tau_(EC_2.7.7.7)	DNA Metabolism	DNA uptake, competence	DNA processing cluster
LD19_revised_scaffold10848_1_gene40183	fig|374931.10.peg.1244__1108__Periplasmic_Stress_Response__RseB__Sigma_factor_RpoE_negative_regulatory_protein_RseB_precursor	Stress Response	Periplasmic Stress	Periplasmic Stress Response
LD60_revised_scaffold15792_1_gene87260	fig|374931.9.peg.1087__827__Heat_shock_dnaK_gene_cluster_extended__DNApol__DNA_polymerase_III_delta_prime_subunit_(EC_2.7.7.7)	Stress Response	Heat shock	Heat shock dnaK gene cluster extended
LD14_revised_scaffold54510_1_gene54155	fig|374931.9.peg.1357__59__Selenocysteine_metabolism__SelA__L-seryl-tRNA(Sec)_selenium_transferase_(EC_2.9.1.1)	Protein Metabolism	Selenoproteins	Selenocysteine metabolism
LD60_revised_scaffold61998_1_gene79881	fig|375177.4.peg.1290__658__DNA_repair,_bacterial__RecN__DNA_repair_protein_RecN	DNA Metabolism	DNA repair	DNA repair, bacterial
LD47_revised_scaffold24813_1_gene91279	fig|375177.4.peg.225__1108__Periplasmic_Stress_Response__RseP__Membrane-associated_zinc_metalloprotease	Stress Response	Periplasmic Stress	Periplasmic Stress Response
HD18_revised_scaffold11702_2_gene24501	fig|376686.10.peg.1225__921__Listeria_surface_proteins:_Internalin-like_proteins__lmo0331__Internalin-like_protein_(LPXTG_motif)_Lmo0331_homolog	Virulence, Disease and Defense	Invasion and intracellular resistance	Listeria surface proteins: Internalin-like proteins
HD18_revised_scaffold11702_2_gene24500	fig|376686.10.peg.1225__921__Listeria_surface_proteins:_Internalin-like_proteins__lmo0331__Internalin-like_protein_(LPXTG_motif)_Lmo0331_homolog	Virulence, Disease and Defense	Invasion and intracellular resistance	Listeria surface proteins: Internalin-like proteins
HD35_revised_scaffold21977_3_gene70312	fig|376686.6.peg.1202__556__Cellulosome__GBE__1,4-alpha-glucan_branching_enzyme_(EC_2.4.1.18)	Carbohydrates	Polysaccharides	Cellulosome
HD38_revised_scaffold16934_6_gene74051	fig|376686.6.peg.4236__301__Xylose_utilization__Xyl__Xylanase	Carbohydrates	Monosaccharides	Xylose utilization
HD5_revised_scaffold40461_1_gene87075	fig|378806.7.peg.5495__487__CBSS-342610.3.peg.1536__MltD__Membrane-bound_lytic_murein_transglycosylase_D_precursor_(EC_3.2.1.-)	Clustering-based subsystems	DNA polymerase III epsilon cluster	CBSS-342610.3.peg.1536
LD45_revised_scaffold3701_1_gene7248	fig|378806.7.peg.7004__921__Listeria_surface_proteins:_Internalin-like_proteins__Inl__internalin,_putative	Virulence, Disease and Defense	Invasion and intracellular resistance	Listeria surface proteins: Internalin-like proteins
HD38_revised_scaffold7824_2_gene12146	fig|381124.6.peg.7420__1235__Pyridoxine_(vitamin_B6)_biosynthesis_in_plants__PLR__Putative_uncharacterized_protein__[Source:UniProtKB/TrEMBL;Acc:B4FLT9]	Cofactors, Vitamins, Prosthetic Groups, Pigments	Pyridoxine	Pyridoxine (vitamin B6) biosynthesis in plants
HD35_revised_scaffold39665_3_gene55660	fig|381764.8.peg.1054__1108__Periplasmic_Stress_Response__DegP__HtrA_protease/chaperone_protein	Stress Response	Periplasmic Stress	Periplasmic Stress Response
HD12_revised_scaffold27237_1_gene56923	fig|384676.9.peg.3110__72__Siderophore_Pyoverdine__NR-PS__Non-ribosomal_peptide_synthetase_modules,_pyoverdine	Iron acquisition and metabolism	Siderophores	Siderophore Pyoverdine
HD40_revised_scaffold86827_1_gene139846	fig|385682.4.peg.1378__863__IojapClusters__AC__Adenylate_cyclase_(EC_4.6.1.1)	Miscellaneous	Plant-Prokaryote comparative genomics	IojapClusters
HD8_revised_scaffold100073_1_gene152181	fig|386043.6.peg.2430__1176__Polyglycerolphosphate_lipoteichoic_acid_biosynthesis__LafC__Integral_membrane_protein_LafC,_accessory_function_in_glycolipid_and_LTA_synthesis	Cell Wall and Capsule	Gram-Positive cell wall components	Polyglycerolphosphate lipoteichoic acid biosynthesis
HD16_revised_scaffold10600_1_gene80146	fig|386043.9.peg.2305__1215__Pseudouridine_Metabolism__RsuA__Ribosomal_small_subunit_pseudouridine_synthase_A_(EC_4.2.1.70)	Nucleosides and Nucleotides	-	Pseudouridine Metabolism
LD33_revised_scaffold38946_2_gene49172	fig|386415.6.peg.1610__125__At4g10620_At3g57180_At3g47450__ComEA__Late_competence_protein_ComEA,_DNA_receptor	Predictions based on plant-prokaryote comparative analysis	-	At4g10620 At3g57180 At3g47450
HD12_revised_scaffold2669_8_gene5134	fig|386415.6.peg.1942__1274__RNA_pseudouridine_syntheses__RsuA__Ribosomal_small_subunit_pseudouridine_synthase_A_(EC_5.4.99.19)_**_SSU_Psi516	RNA Metabolism	RNA processing and modification	RNA pseudouridine syntheses
HD8_revised_scaffold103173_1_gene149296	fig|386415.6.peg.921__305__YebC__FIG000605__FIG000605:_protein_co-occurring_with_transport_systems_(COG1739)	Miscellaneous	Plant-Prokaryote comparative genomics	YebC
HD18_revised_scaffold48274_1_gene30051	fig|387093.4.peg.701__102__At3g21300__TrmA__Possible_RNA_methylase_Tmden_0343	Predictions based on plant-prokaryote comparative analysis	-	At3g21300
LD5_revised_scaffold8697_1_gene5892	fig|387344.13.peg.105__635__D-Galacturonate_and_D-Glucuronate_Utilization__KduD__2-dehydro-3-deoxy-D-gluconate_5-dehydrogenase_(EC_1.1.1.127)_@_2-deoxy-D-gluconate_3-dehydrogenase_(EC_1.1.1.125)	Carbohydrates	Monosaccharides	D-Galacturonate and D-Glucuronate Utilization
LD33_revised_scaffold51573_1_gene38353	fig|387344.13.peg.106__647__D-ribose_utilization__RbsR__Ribose_operon_repressor	Carbohydrates	Monosaccharides	D-ribose utilization
LD45_revised_scaffold18121_1_gene3893	fig|387344.13.peg.1746__894__Lactate_Racemization__LarA__LarA:_implicated_in_lactate_racemization	Miscellaneous	Lactate racemization	Lactate Racemization
LD85_revised_scaffold16014_4_gene2031	fig|387344.15.peg.1334__1200__Proteasome_bacterial__LonPDZP__Lon-like_protease_with_PDZ_domain	Protein Metabolism	Protein degradation	Proteasome bacterial
HD47_revised_C602053_1_gene78862	fig|388413.5.peg.3014__657__DNA_repair,_UvrABC_system__UvrC__Excinuclease_ABC,_C_subunit-like	DNA Metabolism	DNA repair	DNA repair, UvrABC system
LD85_revised_scaffold8887_3_gene116928	fig|388919.8.peg.372__769__Fructooligosaccharides(FOS)_and_Raffinose_Utilization__Aga__Alpha-galactosidase_(EC_3.2.1.22)	Carbohydrates	Di- and oligosaccharides	Fructooligosaccharides(FOS) and Raffinose Utilization
HD38_revised_scaffold12280_1_gene70348	fig|388919.9.peg.213__770__Fructose_and_Mannose_Inducible_PTS__LevR__COG4585:_Signal_transduction_histidine_kinase_/_two-component_response_regulator_/_Two_Component_Transcriptional_Regulator,_LuxR_family_(EC_3.1.1.61)	Membrane Transport	Sugar Phosphotransferase Systems, PTS	Fructose and Mannose Inducible PTS
HD12_revised_scaffold4387_6_gene72144	fig|390235.5.peg.4288__915__Lipopolysaccharide_assembly_cluster__R5__Hypothetical_ATP-binding_protein_UPF0042,_contains_P-loop	Clustering-based subsystems	-	Lipopolysaccharide assembly cluster
LD45_revised_scaffold24974_1_gene29501	fig|391009.4.peg.1813__235__Two_cell_division_clusters_relating_to_chromosome_partitioning__Smc__Chromosome_partition_protein_smc	Cell Division and Cell Cycle	-	Two cell division clusters relating to chromosome partitioning
LD33_revised_scaffold7798_2_gene59356	fig|391038.7.peg.498__461__CBSS-265072.7.peg.546__R7__Transcriptional_regulator_containing_an_amidase_domain_and_an_AraC-type_DNA-binding_HTH_domain	Clustering-based subsystems	Methylamine utilization	CBSS-265072.7.peg.546
HD16_revised_scaffold55375_1_gene80319	fig|391295.8.peg.1815__1073__NusA-TFII_Cluster__L7Ae-like__ribosomal_protein_L7Ae_family_protein	Clustering-based subsystems	-	NusA-TFII Cluster
LD33_revised_scaffold51637_2_gene31270	fig|391601.3.peg.2842__989__Multidrug_Resistance_Efflux_Pumps__MacB__Macrolide_export_ATP-binding/permease_protein_MacB_(EC_3.6.3.-)	Virulence	Resistance to antibiotics and toxic compounds	Multidrug Resistance Efflux Pumps
LD33_revised_scaffold8140_1_gene38568	fig|391904.3.peg.1909__769__Fructooligosaccharides(FOS)_and_Raffinose_Utilization__BG__beta-glucosidase_(EC_3.2.1.21)	Carbohydrates	Di- and oligosaccharides	Fructooligosaccharides(FOS) and Raffinose Utilization
LD38_revised_scaffold22470_1_gene11230	fig|391904.3.peg.284__807__Glycogen_metabolism__aAM__Putative_glucanase_glgE_(EC_3.2.1.-)	Carbohydrates	Polysaccharides	Glycogen metabolism
HD12_revised_scaffold6399_3_gene20335	fig|392423.3.peg.2459__793__Glutathione-regulated_potassium-efflux_system_and_associated_functions__GC__diguanylate_cyclase_(GGDEF_domain)_with_PAS/PAC_sensor	Potassium metabolism	-	Glutathione-regulated potassium-efflux system and associated functions
HD37_revised_scaffold49324_1_gene94597	fig|392423.3.peg.994__412__Biogenesis_of_c-type_cytochromes__ResA__Cytochrome_c-type_biogenesis_protein_ResA	Respiration	-	Biogenesis of c-type cytochromes
HD35_revised_scaffold48641_6_gene23452	fig|393117.3.peg.1643__923__Listeria_surface_proteins:_LPXTG_motif__Lmo1666__Putative_peptidoglycan_bound_protein_(LPXTG_motif)_Lmo1666_homolog	Virulence, Disease and Defense	Invasion and intracellular resistance	Listeria surface proteins: LPXTG motif
HD37_revised_C928485_1_gene73018	fig|393117.3.peg.943__1193__Propanediol_utilization__PocR__Propanediol_utilization_transcriptional_activator_*_frameshift	Carbohydrates	Sugar alcohols	Propanediol utilization
LD45_revised_scaffold16406_1_gene33519	fig|393123.3.peg.846__1120__Phage_capsid_proteins__MajCap__Phage_major_capsid_protein_*Fam0068	Phages, Prophages, Transposable elements	Bacteriophage structural proteins	Phage capsid proteins
LD84_revised_scaffold26731_1_gene116001	fig|393133.8.peg.2166__921__Listeria_surface_proteins:_Internalin-like_proteins__lmo0331__Internalin-like_protein_(LPXTG_motif)_Lmo0331_homolog	Virulence, Disease and Defense	Invasion and intracellular resistance	Listeria surface proteins: Internalin-like proteins
HD37_revised_scaffold49324_1_gene94601	fig|394221.8.peg.416__759__Folate_Biosynthesis__pabAc__Aminodeoxychorismate_lyase_(EC_4.1.3.38)	Cofactors, Vitamins, Prosthetic Groups, Pigments	Folate and pterines	Folate Biosynthesis
HD18_revised_scaffold45295_7_gene48059	fig|394503.6.peg.3394__607__Conserved_gene_cluster_possibly_involved_in_RNA_metabolism__RNAmet__23S_rRNA_(guanosine(2251)-2-O)-methyltransferase_(EC_2.1.1.185)_**_RlmB	Miscellaneous	Plant-Prokaryote comparative genomics	Conserved gene cluster possibly involved in RNA metabolism
HD1_revised_scaffold42030_1_gene52115	fig|394503.7.peg.1281__779__Galactosylceramide_and_Sulfatide_metabolism__bGS__Beta-galactosidase_(EC_3.2.1.23)	Sulfur Metabolism	-	Galactosylceramide and Sulfatide metabolism
LD73_revised_C1060132_1_gene3132	fig|394503.7.peg.3010__1135__Phd-Doc,_YdcE-YdcD_toxin-antitoxin_(programmed_cell_death)_systems__YdcE__Programmed_cell_death_toxin_YdcE	Regulation and Cell signaling	Programmed Cell Death and Toxin-antitoxin Systems	Phd-Doc, YdcE-YdcD toxin-antitoxin (programmed cell death) systems
HD83_revised_scaffold13402_1_gene5746	fig|394503.7.peg.694__740__Fatty_Acid_Biosynthesis_FASII__PPT__4-phosphopantetheinyl_transferase_(EC_2.7.8.-)	Fatty Acids, Lipids, and Isoprenoids	Fatty acids	Fatty Acid Biosynthesis FASII
HD35_revised_scaffold89704_3_gene101867	fig|395961.4.peg.1737__1275__RP_Bacterial_Cell_Division__ftsA__Type_IV_pilus_biogenesis_protein_PilM	Clustering-based subsystems	-	RP Bacterial Cell Division
HD47_revised_scaffold11345_2_gene89002	fig|395961.9.peg.2685__622__Cyanobacterial_Circadian_Clock__CikA__Circadian_input_kinase_A	Cell Division and Cell Cycle	-	Cyanobacterial Circadian Clock
LD33_revised_scaffold51451_1_gene32560	fig|396513.4.peg.1992__996__Murein_hydrolase_regulation_and_cell_death__cidR__LysR_family_regulatory_protein_CidR	Regulation and Cell signaling	Programmed Cell Death and Toxin-antitoxin Systems	Murein hydrolase regulation and cell death
HD37_revised_C922373_1_gene33737	fig|396588.3.peg.546__1047__Na(+)-translocating_NADH-quinone_oxidoreductase_and_rnf-like_group_of_electron_transport_complexes__ApbE__FAD:protein_FMN_transferase_(EC_2.7.1.180)	Respiration	Electron donating reactions	Na(+)-translocating NADH-quinone oxidoreductase and rnf-like group of electron transport complexes
LD11_revised_scaffold79114_2_gene178205	fig|397353.2.peg.20__1125__Phage_head_and_packaging__head47__Phage_capsid_and_scaffold	Phages, Prophages, Transposable elements, Plasmids	Phages, Prophages	Phage head and packaging
HD5_revised_scaffold15328_1_gene53580	fig|397948.3.peg.1319__831__Heme_biosynthesis_orphans__NirJ2__Radical_SAM_heme_biosynthesis_protein_AhbC,_12,18-didecarboxysirohaem_deacetylase	Cofactors, Vitamins, Prosthetic Groups, Pigments	Tetrapyrroles	Heme biosynthesis orphans
HD38_revised_scaffold9786_1_gene26197	fig|398511.4.peg.250__790__Glutaredoxins__RLDP__Rhodanese-like_domain_protein	Stress Response	Oxidative stress	Glutaredoxins
LD61_revised_scaffold18500_1_gene4047	fig|398513.5.peg.1726__90__Sortase__AP__Cell_wall_surface_anchor_family_protein	Cell Wall and Capsule	Gram-Positive cell wall components	Sortase
LD33_revised_scaffold45576_3_gene23809	fig|398578.3.peg.3114__219__Transport_of_Molybdenum__ModB__ABC_transporter,_permease_protein	Membrane Transport	-	Transport of Molybdenum
HD31_revised_scaffold14191_11_gene21240	fig|398580.3.peg.3047__412__Biogenesis_of_c-type_cytochromes__TlpA__Thiol:disulfide_oxidoreductase_TlpA	Respiration	-	Biogenesis of c-type cytochromes
HD35_revised_scaffold84089_1_gene70349	fig|398767.5.peg.3404__1289__Resistance_to_chromium_compounds__ChrA__Chromate_transport_protein_ChrA	Virulence	Resistance to antibiotics and toxic compounds	Resistance to chromium compounds
LD3_revised_scaffold10464_1_gene92720	fig|39947.4.peg.21687__830__Heme_and_Siroheme_biosynthesis_in_plants__PPOae__Protoporphyrinogen_IX_oxidase,_aerobic,_HemY_(EC_1.3.3.4)	Cofactors, Vitamins, Prosthetic Groups, Pigments	Tetrapyrroles	Heme and Siroheme biosynthesis in plants
LD5_revised_scaffold24112_1_gene31721	fig|399726.4.peg.1089__769__Fructooligosaccharides(FOS)_and_Raffinose_Utilization__MsmE__Multiple_sugar_ABC_transporter,_substrate-binding_protein	Carbohydrates	Di- and oligosaccharides	Fructooligosaccharides(FOS) and Raffinose Utilization
HD81_revised_C885237_1_gene39870	fig|399726.4.peg.2273__306__YgfZ__SplB__Spore_photoproduct_lyase_(EC_4.1.99.14)	Cofactors, Vitamins, Prosthetic Groups, Pigments	Folate and pterines	YgfZ
HD12_revised_scaffold6794_1_gene51525	fig|399739.6.peg.4250__890__L-rhamnose_utilization__RhaR__L-rhamnose_operon_transcriptional_activator_RhaR	Carbohydrates	Monosaccharides	L-rhamnose utilization
LD33_revised_scaffold28872_4_gene10424	fig|399739.8.peg.1114__611__Copper_homeostasis__ClfA__Multidrug_resistance_transporter,_Bcr/CflA_family	Virulence	Resistance to antibiotics and toxic compounds	Copper homeostasis
LD24_revised_C521961_1_gene9435	fig|399795.3.peg.5120__983__Molybdenum_cofactor_biosynthesis__moaC__Cyclic_pyranopterin_monophosphate_synthase_accessory_protein_**_MoaC	Cofactors, Vitamins, Prosthetic Groups, Pigments	Folate and pterines	Molybdenum cofactor biosynthesis
HD35_revised_scaffold104719_1_gene64647	fig|399804.3.peg.1647__914__Lipopolysaccharide_assembly__YrbG__Inner_membrane_protein_YrbG,_predicted_calcium/sodium:proton_antiporter	Cell Wall and Capsule	Gram-Negative cell wall components	Lipopolysaccharide assembly
HD37_revised_scaffold49239_1_gene46655	fig|400673.7.peg.1587__199__Ton_and_Tol_transport_systems__TRPe__TPR_repeat_containing_exported_protein;_Putative_periplasmic_protein_contains_a_protein_prenylyltransferase_domain	Membrane Transport	-	Ton and Tol transport systems
LD85_revised_scaffold12906_3_gene48575	fig|401473.3.peg.1033__1008__Ammonia_assimilation__GlnE__Glutamate-ammonia-ligase_adenylyltransferase_(EC_2.7.7.42)	Nitrogen Metabolism	-	Ammonia assimilation
LD61_revised_scaffold20000_1_gene4621	fig|401473.3.peg.1076__657__DNA_repair,_UvrABC_system__UvrA__Excinuclease_ABC_subunit_A	DNA Metabolism	DNA repair	DNA repair, UvrABC system
LD45_revised_scaffold16594_2_gene54351	fig|401473.3.peg.1077__657__DNA_repair,_UvrABC_system__UvrC__Excinuclease_ABC_subunit_C	DNA Metabolism	DNA repair	DNA repair, UvrABC system
LD33_revised_scaffold51473_1_gene64388	fig|401473.3.peg.1211__658__DNA_repair,_bacterial__RecN__DNA_repair_protein_RecN	DNA Metabolism	DNA repair	DNA repair, bacterial
LD64_revised_C649847_1_gene69758	fig|401473.3.peg.1225__1164__Arginine_Biosynthesis_extended__ArgR__Arginine_pathway_regulatory_protein_ArgR,_repressor_of_arg_regulon	Amino Acids and Derivatives	Arginine; urea cycle, polyamines	Arginine Biosynthesis extended
LD33_revised_scaffold45833_2_gene51066	fig|401473.3.peg.1257__170__Test_-_Thiamin__YkoE__Substrate-specific_component_YkoE_of_thiamin-regulated_ECF_transporter_for_HydroxyMethylPyrimidine	Cofactors, Vitamins, Prosthetic Groups, Pigments	-	Test - Thiamin
LD85_revised_scaffold66683_2_gene5248	fig|401473.3.peg.1265__809__Glycolysis_and_Gluconeogenesis__PPgK__Polyphosphate_glucokinase_(EC_2.7.1.63)	Carbohydrates	Central carbohydrate metabolism	Glycolysis and Gluconeogenesis
LD33_revised_scaffold43410_2_gene20851	fig|401473.3.peg.1270__170__Test_-_Thiamin__THIse2(TenA1)__Thiaminase_II_(EC_3.5.99.2)_involved_in_salvage_of_thiamin_pyrimidine_moiety,_TenA_subgroup_with_Cys_in_active_site	Cofactors, Vitamins, Prosthetic Groups, Pigments	-	Test - Thiamin
LD61_revised_scaffold15536_3_gene41227	fig|401473.3.peg.1272__1207__Protein_degradation__PepC__Aminopeptidase_C_(EC_3.4.22.40)	Protein Metabolism	Protein degradation	Protein degradation
LD33_revised_scaffold24965_1_gene45264	fig|401473.3.peg.1279__127__Stringent_Response,_(p)ppGpp_metabolism__Tyr-tRD__D-aminoacyl-tRNA_deacylase_(EC_3.1.1.96)	Regulation and Cell signaling	-	Stringent Response, (p)ppGpp metabolism
LD52_revised_scaffold45332_2_gene42778	fig|401473.3.peg.13__763__Formaldehyde_assimilation:_Ribulose_monophosphate_pathway__HPS__D-arabino-3-hexulose_6-phosphate_formaldehyde-lyase_(EC_4.1.2.43)	Carbohydrates	One-carbon Metabolism	Formaldehyde assimilation: Ribulose monophosphate pathway
LD85_revised_scaffold13279_3_gene57001	fig|401473.3.peg.1328__1__Resistance_to_fluoroquinolones__parC__Topoisomerase_IV_subunit_A_(EC_5.99.1.-)	Virulence	Resistance to antibiotics and toxic compounds	Resistance to fluoroquinolones
LD61_revised_scaffold9220_3_gene53871	fig|401473.3.peg.1346__604__Competence_or_DNA_damage-inducible_protein_CinA_and_related_protein_families__RecA__RecA_protein	Miscellaneous	Plant-Prokaryote comparative genomics	Competence or DNA damage-inducible protein CinA and related protein families
LD85_revised_scaffold27209_3_gene104087	fig|401473.3.peg.1350__604__Competence_or_DNA_damage-inducible_protein_CinA_and_related_protein_families__2.7.8.5__CDP-diacylglycerol--glycerol-3-phosphate_3-phosphatidyltransferase_(EC_2.7.8.5)	Miscellaneous	Plant-Prokaryote comparative genomics	Competence or DNA damage-inducible protein CinA and related protein families
LD45_revised_scaffold15356_2_gene31600	fig|401473.3.peg.1351__1275__RP_Bacterial_Cell_Division__ftsK__DNA_translocase_FtsK	Clustering-based subsystems	-	RP Bacterial Cell Division
LD61_revised_scaffold21610_2_gene9982	fig|401473.3.peg.1363__14__Rhamnose_containing_glycans__10__Teichoic_acid_export_ATP-binding_protein_TagH_(EC_3.6.3.40)	Cell Wall and Capsule	Capsular and extracellular polysacchrides	Rhamnose containing glycans
LD33_revised_C831332_1_gene31912	fig|401473.3.peg.1418__572__Chorismate_Synthesis__ADG__Arogenate_dehydrogenase_(EC_1.3.1.43)	Amino Acids and Derivatives	Aromatic amino acids and derivatives	Chorismate Synthesis
LD61_revised_scaffold20149_1_gene58647	fig|401473.3.peg.1457__366__Bacterial_Cytoskeleton__FtsQH__Cell_division_protein_FtsQ	Cell Division and Cell Cycle	-	Bacterial Cytoskeleton
LD45_revised_scaffold18645_1_gene50260	fig|401473.3.peg.1461__1275__RP_Bacterial_Cell_Division__ftsW__Cell_division_protein_FtsW	Clustering-based subsystems	-	RP Bacterial Cell Division
LD38_revised_scaffold21559_2_gene10223	fig|401473.3.peg.1465__1276__Raj_MurE__MurE__UDP-N-acetylmuramoylalanyl-D-glutamate--L-lysine_ligase_(EC_6.3.2.7)	Cell Wall and Capsule	-	Raj MurE
LD33_revised_scaffold52133_1_gene13491	fig|401473.3.peg.1514__586__Cobalt-zinc-cadmium_resistance__TRMer__Transcriptional_regulator,_MerR_family	Virulence	Resistance to antibiotics and toxic compounds	Cobalt-zinc-cadmium resistance
LD85_revised_scaffold16014_4_gene2029	fig|401473.3.peg.1540__666__DNA_repair,_bacterial_UvrD_and_related_helicases__UvrD-actino__ATP-dependent_DNA_helicase_UvrD/PcrA,_actinomycete_paralog	DNA Metabolism	DNA repair	DNA repair, bacterial UvrD and related helicases
LD85_revised_scaffold16014_1_gene50541	fig|401473.3.peg.1546__788__Glutamine,_Glutamate,_Aspartate_and_Asparagine_Biosynthesis__MurI__Glutamate_racemase_(EC_5.1.1.3)	Amino Acids and Derivatives	Glutamine, glutamate, aspartate, asparagine; ammonia assimilation	Glutamine, Glutamate, Aspartate and Asparagine Biosynthesis
LD85_revised_scaffold16014_1_gene50539	fig|401473.3.peg.1548__652__DNA_Repair_Base_Excision__gly4__DNA-3-methyladenine_glycosylase_II_(EC_3.2.2.21)	DNA Metabolism	DNA repair	DNA Repair Base Excision
LD45_revised_scaffold15584_2_gene58250	fig|401473.3.peg.1560__779__Galactosylceramide_and_Sulfatide_metabolism__bGS__Beta-galactosidase_(EC_3.2.1.23)	Sulfur Metabolism	-	Galactosylceramide and Sulfatide metabolism
LD33_revised_C823531_1_gene36140	fig|401473.3.peg.1569__898__Lactose_utilization__LacA__Galactoside_O-acetyltransferase_(EC_2.3.1.18)	Carbohydrates	Di- and oligosaccharides	Lactose utilization
LD61_revised_scaffold19165_6_gene19121	fig|401473.3.peg.1595__779__Galactosylceramide_and_Sulfatide_metabolism__bGS__Beta-galactosidase_(EC_3.2.1.23)	Sulfur Metabolism	-	Galactosylceramide and Sulfatide metabolism
LD5_revised_scaffold21745_1_gene46634	fig|401473.3.peg.1601__643__D-gluconate_and_ketogluconates_metabolism__GP_BS__Gluconate_permease,_Bsu4004_homolog	Carbohydrates	Monosaccharides	D-gluconate and ketogluconates metabolism
LD33_revised_scaffold51630_1_gene31941	fig|401473.3.peg.1606__22__Ribonucleotide_reduction__RNRIII_AP__Ribonucleotide_reductase_of_class_III_(anaerobic),_activating_protein_(EC_1.97.1.4)	Nucleosides and Nucleotides	-	Ribonucleotide reduction
LD33_revised_scaffold51630_1_gene31942	fig|401473.3.peg.1607__22__Ribonucleotide_reduction__RNRIII__Ribonucleotide_reductase_of_class_III_(anaerobic),_large_subunit_(EC_1.17.4.2)	Nucleosides and Nucleotides	-	Ribonucleotide reduction
LD33_revised_scaffold51630_1_gene31943	fig|401473.3.peg.1609__658__DNA_repair,_bacterial__XseA__Exodeoxyribonuclease_VII_large_subunit_(EC_3.1.11.6)	DNA Metabolism	DNA repair	DNA repair, bacterial
LD33_revised_scaffold38882_1_gene18477	fig|401473.3.peg.1671__661__DNA_repair,_bacterial_RecBCD_pathway__SCO5184__ATP-dependent_DNA_helicase_SCO5184	DNA Metabolism	DNA repair	DNA repair, bacterial RecBCD pathway
LD38_revised_scaffold43637_1_gene32952	fig|401473.3.peg.1688__658__DNA_repair,_bacterial__MutY__A/G-specific_adenine_glycosylase_(EC_3.2.2.-)	DNA Metabolism	DNA repair	DNA repair, bacterial
LD61_revised_scaffold13890_1_gene8282	fig|401473.3.peg.1704__1102__Peptidoglycan_Biosynthesis__PBP__Multimodular_transpeptidase-transglycosylase_(EC_2.4.1.129)_(EC_3.4.-.-)	Cell Wall and Capsule	-	Peptidoglycan Biosynthesis
LD52_revised_scaffold41707_1_gene113304	fig|401473.3.peg.171__790__Glutaredoxins__GRNrdH__Glutaredoxin-like_protein_NrdH,_required_for_reduction_of_Ribonucleotide_reductase_class_Ib	Stress Response	Oxidative stress	Glutaredoxins
LD45_revised_scaffold22446_1_gene10311	fig|401473.3.peg.1713__1070__Nudix_KE__NudC__NADH_pyrophosphatase_(EC_3.6.1.22)	Stress Response	Detoxification	Nudix KE
LD33_revised_scaffold52019_4_gene39504	fig|401473.3.peg.176__1275__RP_Bacterial_Cell_Division__ftsY__Signal_recognition_particle_receptor_FtsY	Clustering-based subsystems	-	RP Bacterial Cell Division
LD61_revised_scaffold8314_6_gene15890	fig|401473.3.peg.180__1008__Ammonia_assimilation__GlnD__[Protein-PII]_uridylyltransferase_(EC_2.7.7.59)_/_[Protein-PII]-UMP_uridylyl-removing_enzyme	Nitrogen Metabolism	-	Ammonia assimilation
LD61_revised_scaffold21268_2_gene57944	fig|401473.3.peg.1804__779__Galactosylceramide_and_Sulfatide_metabolism__bGS__Beta-galactosidase_(EC_3.2.1.23)	Sulfur Metabolism	-	Galactosylceramide and Sulfatide metabolism
LD45_revised_scaffold4746_1_gene32136	fig|401473.3.peg.1820__1275__RP_Bacterial_Cell_Division__maf__Septum_formation_protein_Maf	Clustering-based subsystems	-	RP Bacterial Cell Division
LD38_revised_scaffold8472_4_gene37454	fig|401473.3.peg.1853__808__Glycolate,_glyoxylate_interconversions__FCoA__Formyl-coenzyme_A_transferase_(EC_2.8.3.16)	Carbohydrates	Central carbohydrate metabolism	Glycolate, glyoxylate interconversions
LD33_revised_scaffold50536_4_gene37126	fig|401473.3.peg.1855__808__Glycolate,_glyoxylate_interconversions__OxD__Oxalyl-CoA_decarboxylase_(EC_4.1.1.8)	Carbohydrates	Central carbohydrate metabolism	Glycolate, glyoxylate interconversions
LD33_revised_scaffold52019_2_gene16957	fig|401473.3.peg.186__90__Sortase__SrtA__Sortase_A,_LPXTG_specific	Cell Wall and Capsule	Gram-Positive cell wall components	Sortase
LD52_revised_scaffold58339_1_gene87096	fig|401473.3.peg.1889__90__Sortase__SrtA__Sortase_A,_LPXTG_specific	Cell Wall and Capsule	Gram-Positive cell wall components	Sortase
LD33_revised_scaffold47591_1_gene21407	fig|401473.3.peg.1918__116__Streptococcal_Hyaluronic_Acid_Capsule__hasB__UDP-glucose_6-dehydrogenase_(EC_1.1.1.22)	Cell Wall and Capsule	Capsular and extracellular polysacchrides	Streptococcal Hyaluronic Acid Capsule
LD33_revised_scaffold50471_1_gene22197	fig|401473.3.peg.1932__14__Rhamnose_containing_glycans__OAT__O-antigen_export_system,_permease_protein	Cell Wall and Capsule	Capsular and extracellular polysacchrides	Rhamnose containing glycans
LD64_revised_C649821_1_gene12236	fig|401473.3.peg.1957__255__UDP-N-acetylmuramate_from_Fructose-6-phosphate_Biosynthesis__NagA__N-acetylglucosamine-6-phosphate_deacetylase_(EC_3.5.1.25)	Cell Wall and Capsule	-	UDP-N-acetylmuramate from Fructose-6-phosphate Biosynthesis
LD33_revised_scaffold49796_1_gene8190	fig|401473.3.peg.1957__255__UDP-N-acetylmuramate_from_Fructose-6-phosphate_Biosynthesis__NagA__N-acetylglucosamine-6-phosphate_deacetylase_(EC_3.5.1.25)	Cell Wall and Capsule	-	UDP-N-acetylmuramate from Fructose-6-phosphate Biosynthesis
LD45_revised_scaffold15453_3_gene51077	fig|401473.3.peg.1999__166__At5g63290__RsmI__16S_rRNA_(cytidine(1402)-2-O)-methyltransferase_(EC_2.1.1.198)_**_RsmI	Stress Response	Heat shock	At5g63290
LD33_revised_scaffold50776_10_gene53886	fig|401473.3.peg.2016__1232__Putrescine_utilization_pathways__gabaT__Gamma-aminobutyrate:alpha-ketoglutarate_aminotransferase_(EC_2.6.1.19)	Amino Acids and Derivatives	Arginine; urea cycle, polyamines	Putrescine utilization pathways
LD33_revised_scaffold50778_7_gene56301	fig|401473.3.peg.2061__90__Sortase__SrtA__Sortase_A,_LPXTG_specific	Cell Wall and Capsule	Gram-Positive cell wall components	Sortase
LD33_revised_scaffold52019_2_gene16955	fig|401473.3.peg.2063__90__Sortase__AP__Cell_wall_surface_anchor_family_protein	Cell Wall and Capsule	Gram-Positive cell wall components	Sortase
LD33_revised_scaffold50778_4_gene1870	fig|401473.3.peg.2073__807__Glycogen_metabolism__AMse__4-alpha-glucanotransferase_(amylomaltase)_(EC_2.4.1.25)	Carbohydrates	Polysaccharides	Glycogen metabolism
LD61_revised_scaffold19518_1_gene68727	fig|401473.3.peg.2083__779__Galactosylceramide_and_Sulfatide_metabolism__bGS__Beta-galactosidase_(EC_3.2.1.23)	Sulfur Metabolism	-	Galactosylceramide and Sulfatide metabolism
LD85_revised_scaffold8887_5_gene109070	fig|401473.3.peg.210__779__Galactosylceramide_and_Sulfatide_metabolism__bGS__Beta-galactosidase_(EC_3.2.1.23)	Sulfur Metabolism	-	Galactosylceramide and Sulfatide metabolism
LD33_revised_scaffold45446_1_gene1601	fig|401473.3.peg.2139__366__Bacterial_Cytoskeleton__Spo0J__Chromosome_(plasmid)_partitioning_protein_ParB	Cell Division and Cell Cycle	-	Bacterial Cytoskeleton
LD61_revised_scaffold121_2_gene35729	fig|401473.3.peg.266__90__Sortase__AP__Cell_wall_surface_anchor_family_protein	Cell Wall and Capsule	Gram-Positive cell wall components	Sortase
LD33_revised_scaffold45576_3_gene23807	fig|401473.3.peg.272__1102__Peptidoglycan_Biosynthesis__ddl__D-alanine--D-alanine_ligase_(EC_6.3.2.4)_**_cluster_A	Cell Wall and Capsule	-	Peptidoglycan Biosynthesis
LD33_revised_scaffold42329_1_gene50493	fig|401473.3.peg.304__1222__Purine_conversions__GMPsyn2__Glutamine_amidotransferase,_class_I	Nucleosides and Nucleotides	Purines	Purine conversions
LD33_revised_scaffold42329_1_gene50494	fig|401473.3.peg.305__759__Folate_Biosynthesis__Trans4__ATPase_components_of_ABC_transporters_with_duplicated_ATPase_domains	Cofactors, Vitamins, Prosthetic Groups, Pigments	Folate and pterines	Folate Biosynthesis
LD33_revised_scaffold42329_5_gene63189	fig|401473.3.peg.308__1272__RNA_processing_and_degradation,_bacterial__RNaseIII__Ribonuclease_III_(EC_3.1.26.3)	RNA Metabolism	RNA processing and modification	RNA processing and degradation, bacterial
LD33_revised_scaffold51845_3_gene10294	fig|401473.3.peg.318__827__Heat_shock_dnaK_gene_cluster_extended__RNAse__Ribonuclease_PH_(EC_2.7.7.56)	Stress Response	Heat shock	Heat shock dnaK gene cluster extended
LD33_revised_scaffold51845_4_gene31392	fig|401473.3.peg.325__432__CBSS-176299.4.peg.1292__R2__Signal_peptidase_I_(EC_3.4.21.89)	Clustering-based subsystems	Probably GTP or GMP signaling related	CBSS-176299.4.peg.1292
LD61_revised_scaffold13787_4_gene22703	fig|401473.3.peg.326__19__Ribonuclease_H__RNaseHII__Ribonuclease_HII_(EC_3.1.26.4)	RNA Metabolism	RNA processing and modification	Ribonuclease H
LD33_revised_scaffold7798_7_gene21259	fig|401473.3.peg.344__863__IojapClusters__BPL__Biotin--protein_ligase_(EC_6.3.4.9)(EC_6.3.4.10)(EC_6.3.4.11)(EC_6.3.4.15)	Miscellaneous	Plant-Prokaryote comparative genomics	IojapClusters
LD33_revised_scaffold7798_7_gene21256	fig|401473.3.peg.347__419__Biotin_synthesis_&_utilization__Trimer__Acetyl-coenzyme_A_carboxyl_transferase_alpha_chain_(EC_6.4.1.2)_/_Acetyl-coenzyme_A_carboxyl_transferase_beta_chain_(EC_6.4.1.2);_Propionyl-CoA_carboxylase_beta_chain_(EC_6.4.1.3)	Cofactors, Vitamins, Prosthetic Groups, Pigments	Biotin	Biotin synthesis & utilization
LD33_revised_scaffold7798_1_gene51618	fig|401473.3.peg.363__873__Isoprenoid_Biosynthesis__ISPD__2-C-methyl-D-erythritol_4-phosphate_cytidylyltransferase_(EC_2.7.7.60)	Fatty Acids, Lipids, and Isoprenoids	Isoprenoids	Isoprenoid Biosynthesis
LD61_revised_scaffold24248_1_gene69699	fig|401473.3.peg.370__837__High_affinity_phosphate_transporter_and_control_of_PHO_regulon__PhoR__Phosphate_regulon_sensor_protein_PhoR_(SphS)_(EC_2.7.13.3)	Phosphorus Metabolism	-	High affinity phosphate transporter and control of PHO regulon
LD33_revised_scaffold50427_1_gene45633	fig|401473.3.peg.38__1102__Peptidoglycan_Biosynthesis__FtsI__Cell_division_protein_FtsI_[Peptidoglycan_synthetase]_(EC_2.4.1.129)	Cell Wall and Capsule	-	Peptidoglycan Biosynthesis
LD38_revised_scaffold52002_2_gene42145	fig|401473.3.peg.388__24__Ribosomal_protein_S5p_acylation__S5p-ac__Ribosomal-protein-S5p-alanine_acetyltransferase_(EC_2.3.1.128)	Protein Metabolism	Protein processing and modification	Ribosomal protein S5p acylation
LD33_revised_scaffold50427_1_gene45634	fig|401473.3.peg.39__1275__RP_Bacterial_Cell_Division__ftsW__Cell_division_protein_FtsW	Clustering-based subsystems	-	RP Bacterial Cell Division
LD33_revised_scaffold52601_1_gene20360	fig|401473.3.peg.457__166__At5g63290__RadA__DNA_repair_protein_RadA	Stress Response	Heat shock	At5g63290
LD33_revised_scaffold47999_1_gene55973	fig|401473.3.peg.534__403__Beta-lactamase__BLc__Beta-lactamase_class_C_and_other_penicillin_binding_proteins	Virulence	Resistance to antibiotics and toxic compounds	Beta-lactamase
LD52_revised_scaffold4964_1_gene142358	fig|401473.3.peg.535__216__Translation_termination_factors_bacterial__Def__Peptide_deformylase_(EC_3.5.1.88)	Protein Metabolism	Protein biosynthesis	Translation termination factors bacterial
LD85_revised_scaffold13644_2_gene6272	fig|401473.3.peg.542__355__Bacterial_Chemotaxis__malE__Maltodextrin_ABC_transporter,_substrate-binding_protein_MdxE	Motility and Chemotaxis	-	Bacterial Chemotaxis
LD33_revised_scaffold51909_2_gene32526	fig|401473.3.peg.614__1275__RP_Bacterial_Cell_Division__ftsE__Cell_division_transporter,_ATP-binding_protein_FtsE_(TC_3.A.5.1.1)	Clustering-based subsystems	-	RP Bacterial Cell Division
LD33_revised_scaffold41118_3_gene32570	fig|401473.3.peg.637__531__ABC_transporter_dipeptide_(TC_3.A.1.5.2)__dppB__Dipeptide_transport_system_permease_protein_DppB_(TC_3.A.1.5.2)	Membrane Transport	ABC transporters	ABC transporter dipeptide (TC 3.A.1.5.2)
LD33_revised_scaffold41118_3_gene32569	fig|401473.3.peg.638__531__ABC_transporter_dipeptide_(TC_3.A.1.5.2)__dppC__Dipeptide_transport_system_permease_protein_DppC_(TC_3.A.1.5.2)	Membrane Transport	ABC transporters	ABC transporter dipeptide (TC 3.A.1.5.2)
LD44_revised_scaffold27678_1_gene48189	fig|401473.3.peg.642__804__Glycine_and_Serine_Utilization__CysB__Cystathionine_beta-synthase_(EC_4.2.1.22)	Amino Acids and Derivatives	Alanine, serine, and glycine	Glycine and Serine Utilization
LD45_revised_scaffold4652_2_gene16059	fig|401473.3.peg.650__1222__Purine_conversions__detrhy__dNTP_triphosphohydrolase,_broad_substrate_specificity	Nucleosides and Nucleotides	Purines	Purine conversions
LD44_revised_scaffold12094_1_gene138577	fig|401473.3.peg.687__1086__Oxidative_stress__ZUR__Zinc_uptake_regulation_protein_Zur	Stress Response	Oxidative stress	Oxidative stress
LD85_revised_scaffold41533_1_gene9568	fig|401473.3.peg.721__1199__Proteasome_archaeal__PAN-b__Bacterial_proteasome-activating_AAA-ATPase_(PAN)	Protein Metabolism	Protein degradation	Proteasome archaeal
LD5_revised_scaffold15190_1_gene32684	fig|401473.3.peg.807__426__Broadly_distributed_proteins_not_in_subsystems__YbbL__Probable_iron_export_ATP-binding_protein_FetA	Miscellaneous	-	Broadly distributed proteins not in subsystems
LD33_revised_scaffold51442_2_gene21905	fig|401473.3.peg.811__698__EC_3.4.13.-_Dipeptidases__PepE__Alpha-aspartyl_dipeptidase_Peptidase_E_(EC_3.4.13.21)	Protein Metabolism	Protein degradation	EC 3.4.13.- Dipeptidases
LD33_revised_scaffold51610_1_gene30619	fig|401473.3.peg.819__756__Flavodoxin__Fla__Flavodoxin	Cofactors, Vitamins, Prosthetic Groups, Pigments	Riboflavin, FMN, FAD	Flavodoxin
LD61_revised_scaffold20311_4_gene29688	fig|401473.3.peg.90__520__ABC_transporter_branched-chain_amino_acid_(TC_3.A.1.4.1)__livF__Branched-chain_amino_acid_transport_ATP-binding_protein_LivF_(TC_3.A.1.4.1)	Membrane Transport	ABC transporters	ABC transporter branched-chain amino acid (TC 3.A.1.4.1)
LD45_revised_scaffold27668_2_gene37941	fig|401473.3.peg.92__520__ABC_transporter_branched-chain_amino_acid_(TC_3.A.1.4.1)__livJ__Branched-chain_amino_acid_ABC_transporter,_amino_acid-binding_protein_(TC_3.A.1.4.1)	Membrane Transport	ABC transporters	ABC transporter branched-chain amino acid (TC 3.A.1.4.1)
LD45_revised_scaffold27668_1_gene48196	fig|401473.3.peg.93__131__Sucrose_utilization__ScrR_3__Sucrose_operon_repressor_ScrR,_LacI_family	Carbohydrates	Di- and oligosaccharides	Sucrose utilization
LD5_revised_scaffold21912_1_gene16437	fig|401473.3.peg.94__759__Folate_Biosynthesis__pabAc__Aminodeoxychorismate_lyase_(EC_4.1.3.38)	Cofactors, Vitamins, Prosthetic Groups, Pigments	Folate and pterines	Folate Biosynthesis
LD33_revised_scaffold52153_1_gene20563	fig|401473.3.peg.94__759__Folate_Biosynthesis__pabAc__Aminodeoxychorismate_lyase_(EC_4.1.3.38)	Cofactors, Vitamins, Prosthetic Groups, Pigments	Folate and pterines	Folate Biosynthesis
LD45_revised_scaffold9112_6_gene12584	fig|401473.3.peg.962__666__DNA_repair,_bacterial_UvrD_and_related_helicases__UvrD__ATP-dependent_DNA_helicase_UvrD/PcrA_(EC_3.6.4.12)	DNA Metabolism	DNA repair	DNA repair, bacterial UvrD and related helicases
LD33_revised_scaffold52153_1_gene20566	fig|401473.3.peg.97__710__EC699-706__SIG5__Allophanate_hydrolase_2_subunit_1_(EC_3.5.1.54)_/_Allophanate_hydrolase_2_subunit_2_(EC_3.5.1.54)	Clustering-based subsystems	-	EC699-706
LD33_revised_scaffold34087_2_gene68921	fig|401473.3.peg.972__454__CBSS-257314.1.peg.488__R1__Putative_Holliday_junction_resolvase_YqgF	Clustering-based subsystems	Hypothetical protein possible functionally linked with Alanyl-tRNA synthetase	CBSS-257314.1.peg.488
LD82_revised_C935585_1_gene5217	fig|401473.3.peg.995__1143__Phosphate_metabolism__THa__NAD(P)_transhydrogenase_alpha_subunit_(EC_1.6.1.2)	Phosphorus Metabolism	-	Phosphate metabolism
HD23_revised_scaffold42058_1_gene15230	fig|401526.3.peg.1030__1143__Phosphate_metabolism__corC__Magnesium_and_cobalt_efflux_protein_CorC	Phosphorus Metabolism	-	Phosphate metabolism
HD23_revised_scaffold42338_1_gene76055	fig|401526.3.peg.1301__1078__Omega-amidase_KE2__Nit2__Omega_amidase,_Nit2_homolog_(EC_3.5.1.3)	Miscellaneous	Plant-Prokaryote comparative genomics	Omega-amidase KE2
LD63_revised_scaffold14279_2_gene37806	fig|401526.3.peg.1681__658__DNA_repair,_bacterial__LexA__SOS-response_repressor_and_protease_LexA_(EC_3.4.21.88)	DNA Metabolism	DNA repair	DNA repair, bacterial
HD23_revised_scaffold39997_1_gene19288	fig|401526.3.peg.1813__108__Sporulation-related_Hypotheticals__R5__MreB-like_protein_(Mbl_protein)	Clustering-based subsystems	-	Sporulation-related Hypotheticals
HD27_revised_scaffold2354_3_gene43355	fig|401526.3.peg.195__520__ABC_transporter_branched-chain_amino_acid_(TC_3.A.1.4.1)__livJ__Branched-chain_amino_acid_ABC_transporter,_amino_acid-binding_protein_(TC_3.A.1.4.1)	Membrane Transport	ABC transporters	ABC transporter branched-chain amino acid (TC 3.A.1.4.1)
LD95_revised_scaffold28606_2_gene82603	fig|401526.3.peg.2169__1073__NusA-TFII_Cluster__TF2__Translation_initiation_factor_2	Clustering-based subsystems	-	NusA-TFII Cluster
HD23_revised_scaffold41143_2_gene15206	fig|401526.3.peg.2981__696__EC_3.4.11.-_Aminopeptidases__3.4.11.1__Cytosol_aminopeptidase_PepA_(EC_3.4.11.1)	Protein Metabolism	Protein degradation	EC 3.4.11.- Aminopeptidases
LD74_revised_scaffold93116_1_gene176349	fig|401526.3.peg.338__711__ECF_class_transporters__TrpP__Substrate-specific_component_TrpP_of_tryptophan_ECF_transporter	Membrane Transport	-	ECF class transporters
HD12_revised_scaffold6399_3_gene20331	fig|401526.3.peg.868__863__IojapClusters__Iojap__Ribosomal_silencing_factor_RsfA_(former_Iojap)	Miscellaneous	Plant-Prokaryote comparative genomics	IojapClusters
HD38_revised_scaffold7243_4_gene744	fig|401526.3.peg.898__1275__RP_Bacterial_Cell_Division__mreB__Rod_shape-determining_protein_MreB	Clustering-based subsystems	-	RP Bacterial Cell Division
HD5_revised_scaffold30049_1_gene1892	fig|402777.3.peg.2779__1205__Protein_chaperones__CbpA__DnaJ-class_molecular_chaperone_CbpA	Protein Metabolism	Protein folding	Protein chaperones
HD37_revised_C929253_1_gene30567	fig|402777.3.peg.5173__622__Cyanobacterial_Circadian_Clock__CikA__Circadian_input_kinase_A	Cell Division and Cell Cycle	-	Cyanobacterial Circadian Clock
HD38_revised_scaffold319_11_gene7927	fig|402777.3.peg.5651__335__Bacterial_Caspases__Casp_B__Polysaccharide_deacetylase,_caspase_activity	Regulation and Cell signaling	Programmed Cell Death and Toxin-antitoxin Systems	Bacterial Caspases
LD61_revised_scaffold850_2_gene38346	fig|402881.6.peg.2581__1230__Putative_oxidase_COG2907__Transp?__FIG097052:_Sugar_transporter	Fatty Acids, Lipids, and Isoprenoids	Fatty acids	Putative oxidase COG2907
LD85_revised_scaffold66838_1_gene110459	fig|402881.6.peg.28__752__Flagellum__flgL__Flagellar_hook-associated_protein_FlgL	Motility and Chemotaxis	Flagellar motility in Prokaryota	Flagellum
HD18_revised_scaffold59509_1_gene46242	fig|402882.10.peg.64__242__Type_4_secretion_and_conjugative_transfer__TraC__IncF_plasmid_conjugative_transfer_pilus_assembly_protein_TraC	Virulence	Type III, Type IV, Type VI, ESAT secretion systems	Type 4 secretion and conjugative transfer
LD60_revised_scaffold54926_1_gene15642	fig|40324.1.peg.2041__844__HtrA_and_Sec_secretion__SecF__Protein-export_membrane_protein_SecF_(TC_3.A.5.1.1)	Membrane Transport	Protein translocation across cytoplasmic membrane	HtrA and Sec secretion
LD50_revised_scaffold7366_1_gene34045	fig|40324.1.peg.2041__844__HtrA_and_Sec_secretion__SecF__Protein-export_membrane_protein_SecF_(TC_3.A.5.1.1)	Membrane Transport	Protein translocation across cytoplasmic membrane	HtrA and Sec secretion
HD5_revised_scaffold3355_1_gene77046	fig|404589.10.peg.563__355__Bacterial_Chemotaxis__cheR__Chemotaxis_protein_methyltransferase_CheR_(EC_2.1.1.80)	Motility and Chemotaxis	-	Bacterial Chemotaxis
HD12_revised_scaffold14789_1_gene19697	fig|404589.4.peg.2516__862__Iojap__AC__Adenylate_cyclase_(EC_4.6.1.1)	Regulation and Cell signaling	-	Iojap
HD37_revised_scaffold278_1_gene83761	fig|405948.6.peg.3227__895__Lactate_utilization__R4__Lactate-responsive_regulator_LldR_in_Actinobacteria,_GntR_family	Carbohydrates	Organic acids	Lactate utilization
LD33_revised_scaffold52361_1_gene33727	fig|406556.4.peg.702__250__BOX,_RUP_and_SPRITE_repeats_in_Streptococcus_pneumoniae__BOX__BOX_elements	Regulation and Cell signaling	-	BOX, RUP and SPRITE repeats in Streptococcus pneumoniae
HD18_revised_scaffold45295_7_gene48045	fig|406819.9.peg.48__740__Fatty_Acid_Biosynthesis_FASII__FabT__Transcriptional_regulator_of_fatty_acid_biosynthesis_FabT	Fatty Acids, Lipids, and Isoprenoids	Fatty acids	Fatty Acid Biosynthesis FASII
HD18_revised_scaffold59508_1_gene77072	fig|407976.7.peg.4573__242__Type_4_secretion_and_conjugative_transfer__TraC__IncF_plasmid_conjugative_transfer_pilus_assembly_protein_TraC	Virulence	Type III, Type IV, Type VI, ESAT secretion systems	Type 4 secretion and conjugative transfer
LD61_revised_scaffold8954_4_gene13324	fig|4081.3.peg.31227__18__Riboflavin,_FMN_and_FAD_metabolism_Extended__MDR__Multi_antimicrobial_extrusion_protein_(Na(+)/drug_antiporter),_MATE_family_of_MDR_efflux_pumps	Cofactors, Vitamins, Prosthetic Groups, Pigments	Riboflavin, FMN, FAD	Riboflavin, FMN and FAD metabolism Extended
LD45_revised_scaffold14135_6_gene3776	fig|410358.8.peg.194__1275__RP_Bacterial_Cell_Division__ftsX__Cell_division_protein_FtsX	Clustering-based subsystems	-	RP Bacterial Cell Division
HD18_revised_scaffold56568_1_gene5428	fig|411459.7.peg.1206__974__Methylglyoxal_Metabolism__MltD__Membrane-bound_lytic_murein_transglycosylase_D_precursor_(EC_3.2.1.-)	Carbohydrates	Central carbohydrate metabolism	Methylglyoxal Metabolism
HD8_revised_scaffold43800_1_gene123978	fig|411459.7.peg.391__627__Cysteine_Biosynthesis,_MCB_432__CysW__Sulfate_transport_system_permease_protein_CysW	Amino Acids and Derivatives	Lysine, threonine, methionine, and cysteine	Cysteine Biosynthesis, MCB 432
LD45_revised_scaffold14360_5_gene12209	fig|411460.6.peg.2043__90__Sortase__AP__Cell_wall_surface_anchor_family_protein	Cell Wall and Capsule	Gram-Positive cell wall components	Sortase
HD12_revised_scaffold171_5_gene35980	fig|411461.4.peg.1634__586__Cobalt-zinc-cadmium_resistance__TRMer__Transcriptional_regulator,_MerR_family	Virulence	Resistance to antibiotics and toxic compounds	Cobalt-zinc-cadmium resistance
HD51_revised_scaffold49225_2_gene23671	fig|411461.4.peg.1872__1205__Protein_chaperones__HtpG__Chaperone_protein_HtpG	Protein Metabolism	Protein folding	Protein chaperones
HD18_revised_scaffold45295_7_gene48068	fig|411463.4.peg.70__1104__Peptidoglycan_biosynthesis--gjo__MurF-mDAPA__UDP-N-acetylmuramoylalanyl-D-glutamyl-2,6-diaminopimelate--D-alanyl-D-alanine_ligase_(EC_6.3.2.10)	Cell Wall and Capsule	-	Peptidoglycan biosynthesis--gjo
HD12_revised_scaffold4068_9_gene11231	fig|411463.4.peg.923__491__CBSS-350688.3.peg.1509__R2__Polyribonucleotide_nucleotidyltransferase_(EC_2.7.7.8)	Clustering-based subsystems	-	CBSS-350688.3.peg.1509
HD1_revised_scaffold42047_1_gene51050	fig|411464.8.peg.2456__846__Hydrogenases__PPP__Periplasmic_[Fe]_hydrogenase_(EC_1.12.7.2)	Respiration	Electron donating reactions	Hydrogenases
LD63_revised_scaffold14279_3_gene36443	fig|411465.10.peg.27__1133__Phage_tail_proteins_2__Maj__Phage_major_tail_protein	Phages, Prophages, Transposable elements, Plasmids	Phages, Prophages	Phage tail proteins 2
LD44_revised_scaffold31651_1_gene76823	fig|411465.10.peg.27__1133__Phage_tail_proteins_2__Maj__Phage_major_tail_protein	Phages, Prophages, Transposable elements, Plasmids	Phages, Prophages	Phage tail proteins 2
HD8_revised_scaffold233_2_gene115187	fig|411467.6.peg.1146__403__Beta-lactamase__BLc__Beta-lactamase_class_C_and_other_penicillin_binding_proteins	Virulence	Resistance to antibiotics and toxic compounds	Beta-lactamase
HD18_revised_scaffold45295_7_gene48041	fig|411467.6.peg.1371__654__DNA_processing_cluster__dnaX__DNA_polymerase_III_subunits_gamma_and_tau_(EC_2.7.7.7)	DNA Metabolism	DNA uptake, competence	DNA processing cluster
HD5_revised_scaffold13861_2_gene79560	fig|411467.6.peg.1847__711__ECF_class_transporters__FolT__Substrate-specific_component_FolT_of_folate_ECF_transporter	Membrane Transport	-	ECF class transporters
HD18_revised_scaffold11702_2_gene24488	fig|411467.6.peg.1860__836__Hfl_operon__HflX__GTP-binding_protein_HflX	Stress Response	-	Hfl operon
HD18_revised_scaffold71725_1_gene76344	fig|411467.6.peg.1891__382__tRNA_mods_Archaea__Dus__tRNA_dihydrouridine_synthase_B_(EC_1.-.-.-)	RNA Metabolism	RNA processing and modification	tRNA mods Archaea
HD8_revised_scaffold9469_6_gene106200	fig|411467.6.peg.211__491__CBSS-350688.3.peg.1509__Dipic__Dipicolinate_synthase_subunit_A_(EC_4.2.1.52)	Clustering-based subsystems	-	CBSS-350688.3.peg.1509
HD8_revised_scaffold9469_6_gene106159	fig|411467.6.peg.2493__370__tRNA_aminoacylation,_Met__Met__Methionyl-tRNA_synthetase_(EC_6.1.1.10)	Protein Metabolism	Protein biosynthesis	tRNA aminoacylation, Met
HD8_revised_C1508312_1_gene26999	fig|411467.6.peg.2510__32__Ribosome_SSU_bacterial__S1p__SSU_ribosomal_protein_S1p	Protein Metabolism	Protein biosynthesis	Ribosome SSU bacterial
HD18_revised_scaffold34269_4_gene52565	fig|411467.6.peg.2667__491__CBSS-350688.3.peg.1509__PolC__DNA_polymerase_III_alpha_subunit_(EC_2.7.7.7)	Clustering-based subsystems	-	CBSS-350688.3.peg.1509
HD40_revised_scaffold91217_1_gene93500	fig|411467.6.peg.2953__155__Teichoic_and_lipoteichoic_acids_biosynthesis__UDP__Undecaprenyl-diphosphatase_(EC_3.6.1.27)	Cell Wall and Capsule	Gram-Positive cell wall components	Teichoic and lipoteichoic acids biosynthesis
HD8_revised_scaffold489_1_gene90492	fig|411467.6.peg.369__323__cAMP_signaling_in_bacteria__??__Membrane_proteins_related_to_metalloendopeptidases	Regulation and Cell signaling	-	cAMP signaling in bacteria
HD8_revised_scaffold9469_6_gene106190	fig|411467.6.peg.415__419__Biotin_synthesis_&_utilization__BPL__Biotin--protein_ligase_(EC_6.3.4.9)(EC_6.3.4.10)(EC_6.3.4.11)(EC_6.3.4.15)_/_Biotin_operon_repressor	Cofactors, Vitamins, Prosthetic Groups, Pigments	Biotin	Biotin synthesis & utilization
HD8_revised_scaffold9469_6_gene106202	fig|411467.6.peg.422__36__Ribosome_activity_modulation__RSIP__Ribosomal_subunit_interface_protein	Protein Metabolism	Protein biosynthesis	Ribosome activity modulation
HD8_revised_scaffold9469_6_gene106196	fig|411467.6.peg.723__969__Methionine_Biosynthesis__AHMC__Adenosylhomocysteinase_(EC_3.3.1.1)	Amino Acids and Derivatives	Lysine, threonine, methionine, and cysteine	Methionine Biosynthesis
HD8_revised_scaffold88791_1_gene168757	fig|411467.6.peg.91__809__Glycolysis_and_Gluconeogenesis__PgK__Phosphoglycerate_kinase_(EC_2.7.2.3)	Carbohydrates	Central carbohydrate metabolism	Glycolysis and Gluconeogenesis
HD8_revised_scaffold22676_4_gene92489	fig|411468.9.peg.1209__1275__RP_Bacterial_Cell_Division__mreD__Rod_shape-determining_protein_MreD	Clustering-based subsystems	-	RP Bacterial Cell Division
HD12_revised_scaffold4068_5_gene51182	fig|411468.9.peg.1578__673__DNA-replication__dnaE__DNA_polymerase_III_alpha_subunit_(EC_2.7.7.7)	DNA Metabolism	DNA replication	DNA-replication
HD35_revised_scaffold21977_2_gene171053	fig|411468.9.peg.3554__1183__Potassium_homeostasis__KdpD__Osmosensitive_K+_channel_histidine_kinase_KdpD_(EC_2.7.3.-)	Potassium metabolism	-	Potassium homeostasis
HD8_revised_scaffold9469_6_gene106148	fig|411469.3.peg.1062__808__Glycolate,_glyoxylate_interconversions__2PGP__Phosphoglycolate_phosphatase_(EC_3.1.3.18)	Carbohydrates	Central carbohydrate metabolism	Glycolate, glyoxylate interconversions
HD8_revised_scaffold9469_6_gene106183	fig|411469.3.peg.1084__210__Transcription_initiation,_bacterial_sigma_factors__RpoN__RNA_polymerase_sigma-54_factor_RpoN	RNA Metabolism	Transcription	Transcription initiation, bacterial sigma factors
LD85_revised_scaffold9961_4_gene130110	fig|411469.3.peg.2147__801__Glycerol_fermentation_to_1,3-propanediol__DhaT__1,3-propanediol_dehydrogenase_(EC_1.1.1.202)	Carbohydrates	Sugar alcohols	Glycerol fermentation to 1,3-propanediol
HD51_revised_scaffold47022_2_gene31907	fig|411469.3.peg.2147__801__Glycerol_fermentation_to_1,3-propanediol__DhaT__1,3-propanediol_dehydrogenase_(EC_1.1.1.202)	Carbohydrates	Sugar alcohols	Glycerol fermentation to 1,3-propanediol
HD12_revised_scaffold44479_1_gene40933	fig|411469.3.peg.2624__572__Chorismate_Synthesis__SDH1__Shikimate_5-dehydrogenase_I_alpha_(EC_1.1.1.25)_**_AroDI_alpha	Amino Acids and Derivatives	Aromatic amino acids and derivatives	Chorismate Synthesis
LD11_revised_scaffold74566_1_gene178474	fig|411469.3.peg.2826__969__Methionine_Biosynthesis__CysE__Serine_acetyltransferase_(EC_2.3.1.30)	Amino Acids and Derivatives	Lysine, threonine, methionine, and cysteine	Methionine Biosynthesis
HD8_revised_scaffold27568_2_gene182491	fig|411469.3.peg.576__168__Test_-_Riboflavin__MDR__Multi_antimicrobial_extrusion_protein_(Na(+)/drug_antiporter),_MATE_family_of_MDR_efflux_pumps	Cofactors, Vitamins, Prosthetic Groups, Pigments	Riboflavin, FMN, FAD	Test - Riboflavin
HD19_revised_scaffold10719_2_gene47689	fig|411470.6.peg.1046__131__Sucrose_utilization__ScrB__Beta-fructosidase_(EC_3.2.1.26)	Carbohydrates	Di- and oligosaccharides	Sucrose utilization
HD82_revised_scaffold20908_1_gene12108	fig|411470.6.peg.1154__122__Streptococcus_pyogenes_recombinatorial_zone__MsmRL__Multiple_sugar_metabolism_regulator	Virulence, Disease and Defense	Adhesion	Streptococcus pyogenes recombinatorial zone
LD66_revised_scaffold29229_9_gene64031	fig|411470.6.peg.1752__749__Fermentations:_Mixed_acid__PFLa__Pyruvate_formate-lyase_activating_enzyme_(EC_1.97.1.4)	Carbohydrates	Fermentation	Fermentations: Mixed acid
HD37_revised_scaffold187_2_gene77825	fig|411470.6.peg.2103__726__Exopolysaccharide_Biosynthesis__EpsA__Exopolysaccharide_biosynthesis_transcriptional_activator_EpsA	Cell Wall and Capsule	Capsular and extracellular polysacchrides	Exopolysaccharide Biosynthesis
HD82_revised_scaffold25783_1_gene6157	fig|411470.6.peg.2427__896__Lacto-N-Biose_I_and_Galacto-N-Biose_Metabolic_Pathway__LnpB__N-acetylhexosamine_1-kinase	Carbohydrates	-	Lacto-N-Biose I and Galacto-N-Biose Metabolic Pathway
HD19_revised_scaffold13043_1_gene32841	fig|411470.6.peg.294__824__HPr_catabolite_repression_system__PtsH__Phosphocarrier_protein_of_PTS_system	Regulation and Cell signaling	-	HPr catabolite repression system
HD19_revised_scaffold15632_3_gene25008	fig|411470.6.peg.757__235__Two_cell_division_clusters_relating_to_chromosome_partitioning__ParB__Chromosome_(plasmid)_partitioning_protein_ParB	Cell Division and Cell Cycle	-	Two cell division clusters relating to chromosome partitioning
HD82_revised_scaffold22264_1_gene6169	fig|411470.6.peg.940__78__SigmaB_stress_responce_regulation__ASF__Anti-sigma_F_factor_(EC_2.7.11.1)	Stress Response	-	SigmaB stress responce regulation
HD19_revised_scaffold3379_2_gene27363	fig|411470.6.peg.979__235__Two_cell_division_clusters_relating_to_chromosome_partitioning__SrpAp__Signal_recognition_particle_associated_protein	Cell Division and Cell Cycle	-	Two cell division clusters relating to chromosome partitioning
HD8_revised_scaffold59356_1_gene58798	fig|411471.5.peg.3072__131__Sucrose_utilization__FruK__Fructokinase_(EC_2.7.1.4)	Carbohydrates	Di- and oligosaccharides	Sucrose utilization
HD8_revised_scaffold9469_6_gene106146	fig|411471.5.peg.3547__1281__Recycling_of_Peptidoglycan_Amino_Acids__PepD__Aminoacyl-histidine_dipeptidase_(Peptidase_D)_(EC_3.4.13.3)	Cell Wall and Capsule	-	Recycling of Peptidoglycan Amino Acids
HD38_revised_scaffold26118_3_gene53402	fig|411474.6.peg.1004__827__Heat_shock_dnaK_gene_cluster_extended__FIG009886__FIG009886:_phosphoesterase	Stress Response	Heat shock	Heat shock dnaK gene cluster extended
HD8_revised_scaffold111495_1_gene83609	fig|411474.6.peg.1016__1175__Polyamine_Metabolism__SPERtd__ABC_transporter,_periplasmic_spermidine_putrescine-binding_protein_PotD_(TC_3.A.1.11.1)	Amino Acids and Derivatives	Arginine; urea cycle, polyamines	Polyamine Metabolism
HD8_revised_scaffold111495_1_gene83608	fig|411474.6.peg.1017__1175__Polyamine_Metabolism__SPERtc__Spermidine_Putrescine_ABC_transporter_permease_component_potC_(TC_3.A.1.11.1)	Amino Acids and Derivatives	Arginine; urea cycle, polyamines	Polyamine Metabolism
HD8_revised_scaffold38425_2_gene96612	fig|411474.6.peg.1036__127__Stringent_Response,_(p)ppGpp_metabolism__Tyr-tRD__D-tyrosyl-tRNA(Tyr)_deacylase_(EC_3.6.1.n1)	Regulation and Cell signaling	-	Stringent Response, (p)ppGpp metabolism
HD38_revised_scaffold21897_1_gene19873	fig|411474.6.peg.1037__424__Branched-Chain_Amino_Acid_Biosynthesis__IlvM__Acetolactate_synthase_small_subunit_(EC_2.2.1.6)	Amino Acids and Derivatives	Branched-chain amino acids	Branched-Chain Amino Acid Biosynthesis
LD54_revised_scaffold42715_1_gene64050	fig|411474.6.peg.1039__24__Ribosomal_protein_S5p_acylation__S5p-ac__Ribosomal-protein-S5p-alanine_acetyltransferase	Protein Metabolism	Protein processing and modification	Ribosomal protein S5p acylation
HD35_revised_scaffold97082_2_gene110084	fig|411474.6.peg.1040__168__Test_-_Riboflavin__MDR__Multi_antimicrobial_extrusion_protein_(Na(+)/drug_antiporter),_MATE_family_of_MDR_efflux_pumps	Cofactors, Vitamins, Prosthetic Groups, Pigments	Riboflavin, FMN, FAD	Test - Riboflavin
HV6_revised_scaffold8743_20_gene39422	fig|411474.6.peg.1048__235__Two_cell_division_clusters_relating_to_chromosome_partitioning__ScpB__Segregation_and_condensation_protein_B	Cell Division and Cell Cycle	-	Two cell division clusters relating to chromosome partitioning
HD51_revised_scaffold48901_1_gene35386	fig|411474.6.peg.1053__802__Glycerolipid_and_Glycerophospholipid_Metabolism_in_Bacteria__plsY__Acyl-phosphate:glycerol-3-phosphate_O-acyltransferase_PlsY	Fatty Acids, Lipids, and Isoprenoids	Phospholipids	Glycerolipid and Glycerophospholipid Metabolism in Bacteria
HD35_revised_scaffold34139_6_gene127830	fig|411474.6.peg.1058__19__Ribonuclease_H__RNaseHII__Ribonuclease_HII_(EC_3.1.26.4)	RNA Metabolism	RNA processing and modification	Ribonuclease H
HD12_revised_scaffold4068_14_gene38530	fig|411474.6.peg.1060__263__Universal_GTPases__RbgA__50S_ribosomal_subunit_maturation_GTPase_RbgA_(B._subtilis_YlqF)	Protein Metabolism	Protein biosynthesis	Universal GTPases
HD12_revised_scaffold4068_14_gene38531	fig|411474.6.peg.1061__432__CBSS-176299.4.peg.1292__R2__Signal_peptidase_I_(EC_3.4.21.89)	Clustering-based subsystems	Probably GTP or GMP signaling related	CBSS-176299.4.peg.1292
HD12_revised_scaffold4068_14_gene38532	fig|411474.6.peg.1062__83__Single-copy_ribosomal_proteins__L19p__LSU_ribosomal_protein_L19p	Protein Metabolism	Protein biosynthesis	Single-copy ribosomal proteins
HD12_revised_scaffold4068_14_gene38535	fig|411474.6.peg.1070__1272__RNA_processing_and_degradation,_bacterial__RNaseR__3-to-5_exoribonuclease_RNase_R	RNA Metabolism	RNA processing and modification	RNA processing and degradation, bacterial
HD12_revised_scaffold4068_14_gene38539	fig|411474.6.peg.1072__170__Test_-_Thiamin__ThiD__ThMPase_type_I_predicted_/_Hydroxymethylpyrimidine_phosphate_kinase_ThiD_(EC_2.7.4.7)	Cofactors, Vitamins, Prosthetic Groups, Pigments	-	Test - Thiamin
HD12_revised_scaffold4068_14_gene38540	fig|411474.6.peg.1073__170__Test_-_Thiamin__TMP-Pase(ThiE)__Thiamin-phosphate_pyrophosphorylase_(EC_2.5.1.3)	Cofactors, Vitamins, Prosthetic Groups, Pigments	-	Test - Thiamin
HD12_revised_scaffold4068_14_gene38541	fig|411474.6.peg.1074__170__Test_-_Thiamin__HET-K(ThiM)__Hydroxyethylthiazole_kinase_(EC_2.7.1.50)	Cofactors, Vitamins, Prosthetic Groups, Pigments	-	Test - Thiamin
HD12_revised_scaffold4068_14_gene38543	fig|411474.6.peg.1076__809__Glycolysis_and_Gluconeogenesis__BiPgM__2,3-bisphosphoglycerate-independent_phosphoglycerate_mutase_(EC_5.4.2.1)	Carbohydrates	Central carbohydrate metabolism	Glycolysis and Gluconeogenesis
HD38_revised_scaffold17821_1_gene24205	fig|411474.6.peg.1077__658__DNA_repair,_bacterial__ExoIII__Exodeoxyribonuclease_III_(EC_3.1.11.2)	DNA Metabolism	DNA repair	DNA repair, bacterial
HD38_revised_scaffold22305_1_gene6096	fig|411474.6.peg.1085__424__Branched-Chain_Amino_Acid_Biosynthesis__IlvM__Acetolactate_synthase_small_subunit_(EC_2.2.1.6)	Amino Acids and Derivatives	Branched-chain amino acids	Branched-Chain Amino Acid Biosynthesis
HV6_revised_scaffold38832_2_gene91739	fig|411474.6.peg.1090__327__coA-FolK__DPCK__Dephospho-CoA_kinase_(EC_2.7.1.24)	Cofactors, Vitamins, Prosthetic Groups, Pigments	Coenzyme A	coA-FolK
HV6_revised_scaffold39704_2_gene17130	fig|411474.6.peg.1123__79__Signal_peptidase__LspA__Lipoprotein_signal_peptidase_(EC_3.4.23.36)	Protein Metabolism	Protein processing and modification	Signal peptidase
HD35_revised_scaffold56267_2_gene154571	fig|411474.6.peg.1163__838__Histidine_Biosynthesis__HisAb__ATP_phosphoribosyltransferase_regulatory_subunit_(EC_2.4.2.17)	Amino Acids and Derivatives	Histidine Metabolism	Histidine Biosynthesis
HD38_revised_scaffold41786_2_gene67844	fig|411474.6.peg.1175__1260__RCJ_pfr__feoA__Ferrous_iron_transport_protein_A	Iron acquisition and metabolism	-	RCJ pfr
HD12_revised_scaffold4068_9_gene11230	fig|411474.6.peg.1210__32__Ribosome_SSU_bacterial__S15p__SSU_ribosomal_protein_S15p_(S13e)	Protein Metabolism	Protein biosynthesis	Ribosome SSU bacterial
HD12_revised_scaffold4068_9_gene11228	fig|411474.6.peg.1212__602__Common_Pathway_For_Synthesis_of_Aromatic_Compounds_(DAHP_synthase_to_chorismate)__AroG__Chorismate_synthase_(EC_4.2.3.5)	Amino Acids and Derivatives	Aromatic amino acids and derivatives	Common Pathway For Synthesis of Aromatic Compounds (DAHP synthase to chorismate)
HD12_revised_scaffold4068_9_gene11227	fig|411474.6.peg.1213__749__Fermentations:_Mixed_acid__FE__Formate_efflux_transporter_(TC_2.A.44_family)	Carbohydrates	Fermentation	Fermentations: Mixed acid
HD12_revised_scaffold4068_9_gene11224	fig|411474.6.peg.1216__604__Competence_or_DNA_damage-inducible_protein_CinA_and_related_protein_families__HAD_hyd__FIG002344:_Hydrolase_(HAD_superfamily)	Miscellaneous	Plant-Prokaryote comparative genomics	Competence or DNA damage-inducible protein CinA and related protein families
HD12_revised_scaffold4068_9_gene11222	fig|411474.6.peg.1218__604__Competence_or_DNA_damage-inducible_protein_CinA_and_related_protein_families__RecA__RecA_protein	Miscellaneous	Plant-Prokaryote comparative genomics	Competence or DNA damage-inducible protein CinA and related protein families
HD35_revised_scaffold23757_5_gene34748	fig|411474.6.peg.1222__327__coA-FolK__PPAT__Phosphopantetheine_adenylyltransferase_(EC_2.7.7.3)	Cofactors, Vitamins, Prosthetic Groups, Pigments	Coenzyme A	coA-FolK
HD12_revised_scaffold4068_9_gene11214	fig|411474.6.peg.1225__207__Transcription_factors_bacterial__RecG__ATP-dependent_DNA_helicase_RecG_(EC_3.6.1.-)	RNA Metabolism	Transcription	Transcription factors bacterial
HD12_revised_scaffold4068_9_gene11213	fig|411474.6.peg.1226__802__Glycerolipid_and_Glycerophospholipid_Metabolism_in_Bacteria__Dak__Dihydroxyacetone_kinase_family_protein	Fatty Acids, Lipids, and Isoprenoids	Phospholipids	Glycerolipid and Glycerophospholipid Metabolism in Bacteria
HV6_revised_scaffold29076_2_gene76643	fig|411474.6.peg.1253__38__Ribosome_biogenesis_bacterial__RimM__16S_rRNA_processing_protein_RimM	Protein Metabolism	Protein biosynthesis	Ribosome biogenesis bacterial
HD38_revised_scaffold31945_1_gene16960	fig|411474.6.peg.1268__1073__NusA-TFII_Cluster__RbfA__Ribosome-binding_factor_A	Clustering-based subsystems	-	NusA-TFII Cluster
HD38_revised_scaffold966_1_gene61805	fig|411474.6.peg.1271__1276__Raj_MurE__AmiA__N-acetylmuramoyl-L-alanine_amidase_(EC_3.5.1.28)	Cell Wall and Capsule	-	Raj MurE
LD54_revised_scaffold37986_1_gene14313	fig|411474.6.peg.1320__757__Flavohaemoglobin__IscR__Iron-sulfur_cluster_regulator_IscR	Stress Response	-	Flavohaemoglobin
HD38_revised_scaffold35265_2_gene63632	fig|411474.6.peg.1335__1183__Potassium_homeostasis__TrK__Trk_system_potassium_uptake_protein_TrkA	Potassium metabolism	-	Potassium homeostasis
HV6_revised_scaffold3690_1_gene36532	fig|411474.6.peg.1412__807__Glycogen_metabolism__AMse__4-alpha-glucanotransferase_(amylomaltase)_(EC_2.4.1.25)	Carbohydrates	Polysaccharides	Glycogen metabolism
LD74_revised_C1174742_1_gene143432	fig|411474.6.peg.1446__726__Exopolysaccharide_Biosynthesis__EpsC__Tyrosine-protein_kinase_transmembrane_modulator_EpsC	Cell Wall and Capsule	Capsular and extracellular polysacchrides	Exopolysaccharide Biosynthesis
HD38_revised_scaffold37940_2_gene62339	fig|411474.6.peg.1455__131__Sucrose_utilization__GH13__Family_13_glycosyl_hydrolase,_row_724	Carbohydrates	Di- and oligosaccharides	Sucrose utilization
HD35_revised_scaffold14060_4_gene152776	fig|411474.6.peg.1459__131__Sucrose_utilization__ScrR_3__Sucrose_operon_repressor_ScrR,_LacI_family	Carbohydrates	Di- and oligosaccharides	Sucrose utilization
HD35_revised_scaffold14060_4_gene152783	fig|411474.6.peg.1465__42__Rrf2_family_transcriptional_regulators__IscR__Iron-sulfur_cluster_regulator_IscR	RNA Metabolism	Transcription	Rrf2 family transcriptional regulators
HD38_revised_scaffold41954_2_gene48994	fig|411474.6.peg.1479__969__Methionine_Biosynthesis__SHSH__O-acetylhomoserine_sulfhydrylase_(EC_2.5.1.49)_/_O-succinylhomoserine_sulfhydrylase_(EC_2.5.1.48)	Amino Acids and Derivatives	Lysine, threonine, methionine, and cysteine	Methionine Biosynthesis
HD35_revised_scaffold21977_3_gene70322	fig|411474.6.peg.1482__626__Cysteine_Biosynthesis__CysD1__Sulfate_adenylyltransferase_subunit_1_(EC_2.7.7.4)	Amino Acids and Derivatives	Lysine, threonine, methionine, and cysteine	Cysteine Biosynthesis
LD54_revised_C699493_1_gene70920	fig|411474.6.peg.1484__1060__Anaerobic_respiratory_reductases__ADSRb__Adenylylsulfate_reductase_beta-subunit_(EC_1.8.99.2)	Respiration	Electron accepting reactions	Anaerobic respiratory reductases
HD35_revised_scaffold21977_3_gene70319	fig|411474.6.peg.1485__1060__Anaerobic_respiratory_reductases__ADSRa__Adenylylsulfate_reductase_alpha-subunit_(EC_1.8.99.2)	Respiration	Electron accepting reactions	Anaerobic respiratory reductases
HV6_revised_scaffold11175_8_gene29677	fig|411474.6.peg.1486__274__Uptake_of_selenate_and_selenite__CysA__Sulfate_and_thiosulfate_import_ATP-binding_protein_CysA_(EC_3.6.3.25)	Stress Response	Detoxification	Uptake of selenate and selenite
HD35_revised_scaffold21977_3_gene70317	fig|411474.6.peg.1487__626__Cysteine_Biosynthesis__CysW__Sulfate_transport_system_permease_protein_CysW	Amino Acids and Derivatives	Lysine, threonine, methionine, and cysteine	Cysteine Biosynthesis
HD38_revised_scaffold34133_1_gene23769	fig|411474.6.peg.155__1207__Protein_degradation__YpdF__Aminopeptidase_YpdF_(MP-,_MA-,_MS-,_AP-,_NP-_specific)	Protein Metabolism	Protein degradation	Protein degradation
HD51_revised_scaffold45016_1_gene25460	fig|411474.6.peg.1584__790__Glutaredoxins__AUX4__tRNA_(cytosine34-2-O-)-methyltransferase_(EC_2.1.1.-)	Stress Response	Oxidative stress	Glutaredoxins
HD35_revised_scaffold85629_3_gene146964	fig|411474.6.peg.1610__1221__Purine_Utilization__BH__Beta-hexosaminidase_(EC_3.2.1.52)	Nucleosides and Nucleotides	Purines	Purine Utilization
HD38_revised_scaffold29972_2_gene62531	fig|411474.6.peg.1613__802__Glycerolipid_and_Glycerophospholipid_Metabolism_in_Bacteria__ACP__Acyl_carrier_protein	Fatty Acids, Lipids, and Isoprenoids	Phospholipids	Glycerolipid and Glycerophospholipid Metabolism in Bacteria
HD12_revised_scaffold44048_1_gene80551	fig|411474.6.peg.1632__1275__RP_Bacterial_Cell_Division__ftsH__Cell_division_protein_FtsH_(EC_3.4.24.-)	Clustering-based subsystems	-	RP Bacterial Cell Division
HD12_revised_scaffold44048_1_gene80550	fig|411474.6.peg.1633__1222__Purine_conversions__hyguph__Hypoxanthine-guanine_phosphoribosyltransferase_(EC_2.4.2.8)	Nucleosides and Nucleotides	Purines	Purine conversions
HD38_revised_scaffold23474_1_gene3493	fig|411474.6.peg.1655__14__Rhamnose_containing_glycans__RfbD__O-antigen_export_system_permease_protein_RfbD	Cell Wall and Capsule	Capsular and extracellular polysacchrides	Rhamnose containing glycans
HD12_revised_scaffold44048_1_gene80525	fig|411474.6.peg.1657__726__Exopolysaccharide_Biosynthesis__Glt2__Glycosyl_transferase,_group_2_family_protein	Cell Wall and Capsule	Capsular and extracellular polysacchrides	Exopolysaccharide Biosynthesis
HD35_revised_scaffold108142_2_gene61235	fig|411474.6.peg.1668__779__Galactosylceramide_and_Sulfatide_metabolism__bGS__Beta-galactosidase_(EC_3.2.1.23)	Sulfur Metabolism	-	Galactosylceramide and Sulfatide metabolism
HD8_revised_scaffold106244_1_gene137452	fig|411474.6.peg.1668__779__Galactosylceramide_and_Sulfatide_metabolism__bGS__Beta-galactosidase_(EC_3.2.1.23)	Sulfur Metabolism	-	Galactosylceramide and Sulfatide metabolism
LD54_revised_C745219_1_gene18613	fig|411474.6.peg.1668__779__Galactosylceramide_and_Sulfatide_metabolism__bGS__Beta-galactosidase_(EC_3.2.1.23)	Sulfur Metabolism	-	Galactosylceramide and Sulfatide metabolism
HD51_revised_scaffold23758_1_gene40206	fig|411474.6.peg.1668__779__Galactosylceramide_and_Sulfatide_metabolism__bGS__Beta-galactosidase_(EC_3.2.1.23)	Sulfur Metabolism	-	Galactosylceramide and Sulfatide metabolism
HD35_revised_scaffold39676_1_gene150428	fig|411474.6.peg.1718__969__Methionine_Biosynthesis__MTHFR__5,10-methylenetetrahydrofolate_reductase_(EC_1.5.1.20)_/_Homolog_of_homocysteine-binding_domain	Amino Acids and Derivatives	Lysine, threonine, methionine, and cysteine	Methionine Biosynthesis
HD38_revised_scaffold30842_1_gene35429	fig|411474.6.peg.1748__315__2-phosphoglycolate_salvage__PGPase__Phosphoglycolate_phosphatase_(EC_3.1.3.18)	DNA Metabolism	DNA repair	2-phosphoglycolate salvage
HD12_revised_scaffold2669_4_gene17922	fig|411474.6.peg.175__1164__Arginine_Biosynthesis_extended__ArgR__Arginine_pathway_regulatory_protein_ArgR,_repressor_of_arg_regulon	Amino Acids and Derivatives	Arginine; urea cycle, polyamines	Arginine Biosynthesis extended
LD7_revised_scaffold27163_1_gene10882	fig|411474.6.peg.1759__1102__Peptidoglycan_Biosynthesis__murG__UDP-N-acetylglucosamine--N-acetylmuramyl-(pentapeptide)_pyrophosphoryl-undecaprenol_N-acetylglucosamine_transferase_(EC_2.4.1.227)	Cell Wall and Capsule	-	Peptidoglycan Biosynthesis
HD12_revised_scaffold2669_4_gene17921	fig|411474.6.peg.176__658__DNA_repair,_bacterial__RecN__DNA_repair_protein_RecN	DNA Metabolism	DNA repair	DNA repair, bacterial
HD8_revised_scaffold73059_2_gene71720	fig|411474.6.peg.1766__304__YcfH__YcfH__Putative_deoxyribonuclease_YcfH	DNA Metabolism	-	YcfH
HD12_revised_scaffold2669_4_gene17919	fig|411474.6.peg.178__627__Cysteine_Biosynthesis,_MCB_432__SP__Sulfate_permease	Amino Acids and Derivatives	Lysine, threonine, methionine, and cysteine	Cysteine Biosynthesis, MCB 432
HD38_revised_scaffold7519_1_gene12027	fig|411474.6.peg.1808__654__DNA_processing_cluster__hyp2__FIG000557:_hypothetical_protein_co-occurring_with_RecR	DNA Metabolism	DNA uptake, competence	DNA processing cluster
HD12_revised_scaffold171_3_gene72747	fig|411474.6.peg.1834__763__Formaldehyde_assimilation:_Ribulose_monophosphate_pathway__GAPS__Glucosamine--fructose-6-phosphate_aminotransferase_[isomerizing]_(EC_2.6.1.16)	Carbohydrates	One-carbon Metabolism	Formaldehyde assimilation: Ribulose monophosphate pathway
HD12_revised_scaffold171_3_gene72746	fig|411474.6.peg.1835__370__tRNA_aminoacylation,_Met__Met__Methionyl-tRNA_synthetase_(EC_6.1.1.10)	Protein Metabolism	Protein biosynthesis	tRNA aminoacylation, Met
HD38_revised_scaffold14671_5_gene6277	fig|411474.6.peg.1839__1185__Arginine_and_Ornithine_Degradation__ArgF__Ornithine_carbamoyltransferase_(EC_2.1.3.3)	Amino Acids and Derivatives	Arginine; urea cycle, polyamines	Arginine and Ornithine Degradation
HD12_revised_scaffold2669_4_gene17914	fig|411474.6.peg.184__675__De_Novo_Purine_Biosynthesis__PurL__Phosphoribosylformylglycinamidine_synthase,_synthetase_subunit_(EC_6.3.5.3)_/_Phosphoribosylformylglycinamidine_synthase,_glutamine_amidotransferase_subunit_(EC_6.3.5.3)	Nucleosides and Nucleotides	Purines	De Novo Purine Biosynthesis
HD12_revised_scaffold171_3_gene72741	fig|411474.6.peg.1840__676__De_Novo_Pyrimidine_Synthesis__pyrB__Aspartate_carbamoyltransferase_(EC_2.1.3.2)	Nucleosides and Nucleotides	Pyrimidines	De Novo Pyrimidine Synthesis
HD12_revised_scaffold171_3_gene72739	fig|411474.6.peg.1842__108__Sporulation-related_Hypotheticals__R2__UDP-N-acetylglucosamine_1-carboxyvinyltransferase_(EC_2.5.1.7)	Clustering-based subsystems	-	Sporulation-related Hypotheticals
HD12_revised_scaffold171_2_gene73626	fig|411474.6.peg.1845__969__Methionine_Biosynthesis__SAMS__S-adenosylmethionine_synthetase_(EC_2.5.1.6)	Amino Acids and Derivatives	Lysine, threonine, methionine, and cysteine	Methionine Biosynthesis
HD12_revised_scaffold171_2_gene73618	fig|411474.6.peg.1851__156__At5g37530_(CsdL_protein_family)__aspS__Aspartyl-tRNA_synthetase_(EC_6.1.1.12)	Sulfur Metabolism	Organic sulfur assimilation	At5g37530 (CsdL protein family)
HD12_revised_scaffold171_2_gene73613	fig|411474.6.peg.1857__1222__Purine_conversions__adphtr__Adenine_phosphoribosyltransferase_(EC_2.4.2.7)	Nucleosides and Nucleotides	Purines	Purine conversions
HD12_revised_scaffold171_2_gene73579	fig|411474.6.peg.1874__1242__Pyruvate_metabolism_I:_anaplerotic_reactions,_PEP__MalK__Two-component_sensor_histidine_kinase,_malate_(EC_2.7.3.-)	Carbohydrates	Central carbohydrate metabolism	Pyruvate metabolism I: anaplerotic reactions, PEP
HD12_revised_scaffold171_2_gene73581	fig|411474.6.peg.1874__1242__Pyruvate_metabolism_I:_anaplerotic_reactions,_PEP__MalK__Two-component_sensor_histidine_kinase,_malate_(EC_2.7.3.-)	Carbohydrates	Central carbohydrate metabolism	Pyruvate metabolism I: anaplerotic reactions, PEP
LD54_revised_scaffold12301_1_gene74812	fig|411474.6.peg.1874__1242__Pyruvate_metabolism_I:_anaplerotic_reactions,_PEP__MalK__Two-component_sensor_histidine_kinase,_malate_(EC_2.7.3.-)	Carbohydrates	Central carbohydrate metabolism	Pyruvate metabolism I: anaplerotic reactions, PEP
HD12_revised_scaffold171_2_gene73575	fig|411474.6.peg.1878__1238__Aromatic_amino_acid_interconversions_with_aryl_acids__paaK__Phenylacetate-coenzyme_A_ligase_(EC_6.2.1.30);_Coenzyme_F390_synthetase	Amino Acids and Derivatives	Aromatic amino acids and derivatives	Aromatic amino acid interconversions with aryl acids
HD12_revised_scaffold171_2_gene73574	fig|411474.6.peg.1879__854__Indole-pyruvate_oxidoreductase_complex__IorB__Indolepyruvate_oxidoreductase_subunit_IorB_(EC_1.2.7.8)	Amino Acids and Derivatives	Aromatic amino acids and derivatives	Indole-pyruvate oxidoreductase complex
HV6_revised_scaffold3301_2_gene92359	fig|411474.6.peg.1880__854__Indole-pyruvate_oxidoreductase_complex__IorA__Indolepyruvate_oxidoreductase_subunit_IorA_(EC_1.2.7.8)	Amino Acids and Derivatives	Aromatic amino acids and derivatives	Indole-pyruvate oxidoreductase complex
HD8_revised_scaffold64925_1_gene19522	fig|411474.6.peg.1881__312__YrdC-YciO-Sua5_and_associated_protein_families__AR__Alanine_racemase_(EC_5.1.1.1)	RNA Metabolism	RNA processing and modification	YrdC-YciO-Sua5 and associated protein families
HD35_revised_scaffold48641_2_gene122131	fig|411474.6.peg.1883__827__Heat_shock_dnaK_gene_cluster_extended__COG4123__COG4123:_Predicted_O-methyltransferase	Stress Response	Heat shock	Heat shock dnaK gene cluster extended
HD12_revised_scaffold171_2_gene73564	fig|411474.6.peg.1885__827__Heat_shock_dnaK_gene_cluster_extended__DNApol__DNA_polymerase_III_delta_prime_subunit_(EC_2.7.7.7)	Stress Response	Heat shock	Heat shock dnaK gene cluster extended
HD12_revised_scaffold171_2_gene73562	fig|411474.6.peg.1887__1175__Polyamine_Metabolism__ORNDCa__Arginine_decarboxylase_(EC_4.1.1.19);_Lysine_decarboxylase_(EC_4.1.1.18);_Ornithine_decarboxylase_(EC_4.1.1.17)	Amino Acids and Derivatives	Arginine; urea cycle, polyamines	Polyamine Metabolism
HD12_revised_scaffold171_2_gene73558	fig|411474.6.peg.1891__1275__RP_Bacterial_Cell_Division__mraW__rRNA_small_subunit_methyltransferase_H	Clustering-based subsystems	-	RP Bacterial Cell Division
HD12_revised_scaffold171_2_gene73557	fig|411474.6.peg.1892__1249__Quinate_degradation__QuiB1__3-dehydroquinate_dehydratase_I_(EC_4.2.1.10)_**_AroCI	Metabolism of Aromatic Compounds	Peripheral pathways for catabolism of aromatic compounds	Quinate degradation
HD38_revised_scaffold7090_8_gene59402	fig|411474.6.peg.1944__384__tRNA_processing__RnpA__Ribonuclease_P_protein_component_(EC_3.1.26.5)	RNA Metabolism	RNA processing and modification	tRNA processing
HD38_revised_scaffold7090_8_gene59401	fig|411474.6.peg.1945__1022__Mycobacterium_virulence_operon_involved_in_an_unknown_function_with_a_Jag_Protein_and_YidC_and_YidD__Rv3922c__Protein_YidD	Virulence	-	Mycobacterium virulence operon involved in an unknown function with a Jag Protein and YidC and YidD
HD38_revised_scaffold7090_8_gene59399	fig|411474.6.peg.1947__1022__Mycobacterium_virulence_operon_involved_in_an_unknown_function_with_a_Jag_Protein_and_YidC_and_YidD__Rv3920c__RNA-binding_protein_Jag	Virulence	-	Mycobacterium virulence operon involved in an unknown function with a Jag Protein and YidC and YidD
HD38_revised_scaffold7090_6_gene36174	fig|411474.6.peg.1956__235__Two_cell_division_clusters_relating_to_chromosome_partitioning__ParA__Chromosome_(plasmid)_partitioning_protein_ParA	Cell Division and Cell Cycle	-	Two cell division clusters relating to chromosome partitioning
HD8_revised_scaffold102526_1_gene134437	fig|411474.6.peg.1968__233__Tryptophan_synthesis__trpAb__Anthranilate_synthase,_amidotransferase_component_(EC_4.1.3.27)	Amino Acids and Derivatives	Aromatic amino acids and derivatives	Tryptophan synthesis
HD18_revised_scaffold29750_1_gene81106	fig|411474.6.peg.1975__657__DNA_repair,_UvrABC_system__UvrA__Excinuclease_ABC_subunit_A	DNA Metabolism	DNA repair	DNA repair, UvrABC system
HD12_revised_scaffold4068_18_gene67353	fig|411474.6.peg.2049__936__Macromolecular_synthesis_operon__carB__Carbamoyl-phosphate_synthase_large_chain_(EC_6.3.5.5)	Cell Division and Cell Cycle	-	Macromolecular synthesis operon
HD12_revised_scaffold4068_18_gene67354	fig|411474.6.peg.2050__676__De_Novo_Pyrimidine_Synthesis__pyrAA__Carbamoyl-phosphate_synthase_small_chain_(EC_6.3.5.5)	Nucleosides and Nucleotides	Pyrimidines	De Novo Pyrimidine Synthesis
HD12_revised_scaffold4068_18_gene67355	fig|411474.6.peg.2051__363__tRNA_aminoacylation,_Glu_and_Gln__DUF208__Protein_of_unknown_function_DUF208	Protein Metabolism	Protein biosynthesis	tRNA aminoacylation, Glu and Gln
HD12_revised_scaffold4068_18_gene67359	fig|411474.6.peg.2055__1064__Nonmevalonate_Branch_of_Isoprenoid_Biosynthesis__ISPF__2-C-methyl-D-erythritol_2,4-cyclodiphosphate_synthase_(EC_4.6.1.12)	Fatty Acids, Lipids, and Isoprenoids	Isoprenoids	Nonmevalonate Branch of Isoprenoid Biosynthesis
HD12_revised_scaffold4068_19_gene59453	fig|411474.6.peg.2069__1164__Arginine_Biosynthesis_extended__ArgH__Argininosuccinate_lyase_(EC_4.3.2.1)	Amino Acids and Derivatives	Arginine; urea cycle, polyamines	Arginine Biosynthesis extended
HD12_revised_scaffold4068_19_gene59455	fig|411474.6.peg.2071__210__Transcription_initiation,_bacterial_sigma_factors__SigG__RNA_polymerase_sporulation_specific_sigma_factor_SigG	RNA Metabolism	Transcription	Transcription initiation, bacterial sigma factors
HD12_revised_scaffold4068_19_gene59456	fig|411474.6.peg.2072__216__Translation_termination_factors_bacterial__RF-3__Peptide_chain_release_factor_3	Protein Metabolism	Protein biosynthesis	Translation termination factors bacterial
HD51_revised_scaffold7532_1_gene33122	fig|411474.6.peg.2107__1073__NusA-TFII_Cluster__COG0779__FIG000325:_clustered_with_transcription_termination_protein_NusA	Clustering-based subsystems	-	NusA-TFII Cluster
HD8_revised_scaffold47505_2_gene194734	fig|411474.6.peg.2111__673__DNA-replication__dnaE__DNA_polymerase_III_alpha_subunit_(EC_2.7.7.7)	DNA Metabolism	DNA replication	DNA-replication
HD12_revised_scaffold4068_5_gene51241	fig|411474.6.peg.2112__873__Isoprenoid_Biosynthesis__ISPG__1-hydroxy-2-methyl-2-(E)-butenyl_4-diphosphate_synthase_(EC_1.17.7.1)	Fatty Acids, Lipids, and Isoprenoids	Isoprenoids	Isoprenoid Biosynthesis
HD12_revised_scaffold4068_5_gene51240	fig|411474.6.peg.2113__1108__Periplasmic_Stress_Response__RseP__Membrane-associated_zinc_metalloprotease	Stress Response	Periplasmic Stress	Periplasmic Stress Response
HD12_revised_scaffold4068_5_gene51239	fig|411474.6.peg.2114__873__Isoprenoid_Biosynthesis__ISPC__1-deoxy-D-xylulose_5-phosphate_reductoisomerase_(EC_1.1.1.267)	Fatty Acids, Lipids, and Isoprenoids	Isoprenoids	Isoprenoid Biosynthesis
HD12_revised_scaffold4068_5_gene51236	fig|411474.6.peg.2117__216__Translation_termination_factors_bacterial__Rrf__Ribosome_recycling_factor	Protein Metabolism	Protein biosynthesis	Translation termination factors bacterial
HD38_revised_scaffold20384_1_gene40424	fig|411474.6.peg.2125__1143__Phosphate_metabolism__NaPi__Sodium-dependent_phosphate_transporter	Phosphorus Metabolism	-	Phosphate metabolism
HD12_revised_scaffold4068_5_gene51227	fig|411474.6.peg.2127__763__Formaldehyde_assimilation:_Ribulose_monophosphate_pathway__Repi__Ribulose-phosphate_3-epimerase_(EC_5.1.3.1)	Carbohydrates	One-carbon Metabolism	Formaldehyde assimilation: Ribulose monophosphate pathway
HD12_revised_scaffold4068_5_gene51226	fig|411474.6.peg.2128__263__Universal_GTPases__EngC__Ribosome_small_subunit-stimulated_GTPase_EngC	Protein Metabolism	Protein biosynthesis	Universal GTPases
HD12_revised_scaffold4068_5_gene51221	fig|411474.6.peg.2133__214__Translation_initiation_factors_bacterial__fmt__Methionyl-tRNA_formyltransferase_(EC_2.1.2.9)	Protein Metabolism	Protein biosynthesis	Translation initiation factors bacterial
HD12_revised_scaffold4068_5_gene51220	fig|411474.6.peg.2134__216__Translation_termination_factors_bacterial__Def__Peptide_deformylase_(EC_3.5.1.88)	Protein Metabolism	Protein biosynthesis	Translation termination factors bacterial
HD12_revised_scaffold4068_5_gene51219	fig|411474.6.peg.2135__673__DNA-replication__priA1__Helicase_PriA_essential_for_oriC/DnaA-independent_DNA_replication	DNA Metabolism	DNA replication	DNA-replication
HD38_revised_scaffold16042_1_gene48467	fig|411474.6.peg.2137__1270__RNA_polymerase_bacterial__omega__DNA-directed_RNA_polymerase_omega_subunit_(EC_2.7.7.6)	RNA Metabolism	Transcription	RNA polymerase bacterial
HD38_revised_scaffold16042_1_gene48468	fig|411474.6.peg.2138__1222__Purine_conversions__GK__Guanylate_kinase_(EC_2.7.4.8)	Nucleosides and Nucleotides	Purines	Purine conversions
HD37_revised_scaffold51814_1_gene7666	fig|411474.6.peg.2141__807__Glycogen_metabolism__GS__Glycogen_synthase,_ADP-glucose_transglucosylase_(EC_2.4.1.21)	Carbohydrates	Polysaccharides	Glycogen metabolism
HD12_revised_scaffold4068_5_gene51213	fig|411474.6.peg.2141__807__Glycogen_metabolism__GS__Glycogen_synthase,_ADP-glucose_transglucosylase_(EC_2.4.1.21)	Carbohydrates	Polysaccharides	Glycogen metabolism
HD12_revised_scaffold4068_24_gene106658	fig|411474.6.peg.2143__666__DNA_repair,_bacterial_UvrD_and_related_helicases__UvrD__ATP-dependent_DNA_helicase_UvrD/PcrA	DNA Metabolism	DNA repair	DNA repair, bacterial UvrD and related helicases
HD12_revised_scaffold4068_24_gene106666	fig|411474.6.peg.2151__790__Glutaredoxins__AUX12__Peptide_chain_release_factor_1	Stress Response	Oxidative stress	Glutaredoxins
HD12_revised_scaffold4068_24_gene106667	fig|411474.6.peg.2152__312__YrdC-YciO-Sua5_and_associated_protein_families__PrmC(HemK)__Protein-N(5)-glutamine_methyltransferase_PrmC,_methylates_polypeptide_chain_release_factors_RF1_and_RF2	RNA Metabolism	RNA processing and modification	YrdC-YciO-Sua5 and associated protein families
HD12_revised_scaffold4068_24_gene106672	fig|411474.6.peg.2157__263__Universal_GTPases__EngB__GTP-binding_protein_EngB	Protein Metabolism	Protein biosynthesis	Universal GTPases
HD12_revised_scaffold4068_24_gene106673	fig|411474.6.peg.2158__1209__Proteolysis_in_bacteria,_ATP-dependent__LonI__ATP-dependent_protease_La_(EC_3.4.21.53)_Type_I	Protein Metabolism	Protein degradation	Proteolysis in bacteria, ATP-dependent
HD12_revised_scaffold4068_24_gene106674	fig|411474.6.peg.2159__1209__Proteolysis_in_bacteria,_ATP-dependent__ClpX__ATP-dependent_Clp_protease_ATP-binding_subunit_ClpX	Protein Metabolism	Protein degradation	Proteolysis in bacteria, ATP-dependent
HD12_revised_scaffold4068_24_gene106675	fig|411474.6.peg.2160__1209__Proteolysis_in_bacteria,_ATP-dependent__ClpP__ATP-dependent_Clp_protease_proteolytic_subunit_(EC_3.4.21.92)	Protein Metabolism	Protein degradation	Proteolysis in bacteria, ATP-dependent
HD26_revised_scaffold9975_2_gene57738	fig|411474.6.peg.2161__1275__RP_Bacterial_Cell_Division__tig__Cell_division_trigger_factor_(EC_5.2.1.8)	Clustering-based subsystems	-	RP Bacterial Cell Division
HD38_revised_C484032_1_gene62411	fig|411474.6.peg.2194__802__Glycerolipid_and_Glycerophospholipid_Metabolism_in_Bacteria__ACP__Acyl_carrier_protein	Fatty Acids, Lipids, and Isoprenoids	Phospholipids	Glycerolipid and Glycerophospholipid Metabolism in Bacteria
HD8_revised_scaffold62246_1_gene14071	fig|411474.6.peg.2207__809__Glycolysis_and_Gluconeogenesis__PgM__Phosphoglycerate_mutase_(EC_5.4.2.11)	Carbohydrates	Central carbohydrate metabolism	Glycolysis and Gluconeogenesis
HD35_revised_scaffold23669_1_gene137674	fig|411474.6.peg.2207__809__Glycolysis_and_Gluconeogenesis__PgM__Phosphoglycerate_mutase_(EC_5.4.2.11)	Carbohydrates	Central carbohydrate metabolism	Glycolysis and Gluconeogenesis
HD35_revised_scaffold46667_4_gene170762	fig|411474.6.peg.2232__1275__RP_Bacterial_Cell_Division__tig__Cell_division_trigger_factor_(EC_5.2.1.8)	Clustering-based subsystems	-	RP Bacterial Cell Division
LD54_revised_scaffold9854_1_gene62362	fig|411474.6.peg.2233__1275__RP_Bacterial_Cell_Division__tig__Cell_division_trigger_factor_(EC_5.2.1.8)	Clustering-based subsystems	-	RP Bacterial Cell Division
HD38_revised_scaffold12088_1_gene53420	fig|411474.6.peg.2285__1113__Persister_Cells__HipA__HipA_protein	Dormancy and Sporulation	-	Persister Cells
HD38_revised_scaffold15132_3_gene69245	fig|411474.6.peg.2363__1222__Purine_conversions__in5mde__Inosine-5-monophosphate_dehydrogenase_(EC_1.1.1.205)	Nucleosides and Nucleotides	Purines	Purine conversions
HD35_revised_scaffold35916_4_gene22048	fig|411474.6.peg.2366__275__Uracil-DNA_glycosylase__UDG-1__Uracil-DNA_glycosylase,_family_1	DNA Metabolism	DNA repair	Uracil-DNA glycosylase
HD12_revised_scaffold6399_3_gene20319	fig|411474.6.peg.2369__553__Cell_division-ribosomal_stress_proteins_cluster__R9_2__Transcription_accessory_protein_(S1_RNA-binding_domain)	Clustering-based subsystems	-	Cell division-ribosomal stress proteins cluster
HD12_revised_scaffold6399_3_gene20334	fig|411474.6.peg.2384__995__Murein_Hydrolases__AmiA__N-acetylmuramoyl-L-alanine_amidase_(EC_3.5.1.28)	Cell Wall and Capsule	-	Murein Hydrolases
HD12_revised_scaffold6399_3_gene20336	fig|411474.6.peg.2386__1238__Aromatic_amino_acid_interconversions_with_aryl_acids__iorB__Indolepyruvate_oxidoreductase_subunit_IorB_(EC_1.2.7.8)	Amino Acids and Derivatives	Aromatic amino acids and derivatives	Aromatic amino acid interconversions with aryl acids
HD12_revised_scaffold6399_3_gene20337	fig|411474.6.peg.2387__1238__Aromatic_amino_acid_interconversions_with_aryl_acids__iorA__Indolepyruvate_oxidoreductase_subunit_IorA_(EC_1.2.7.8)	Amino Acids and Derivatives	Aromatic amino acids and derivatives	Aromatic amino acid interconversions with aryl acids
HD26_revised_scaffold12106_1_gene31213	fig|411474.6.peg.2406__799__Glycerate_metabolism__GK-I__Glycerate_kinase_(EC_2.7.1.31)	Carbohydrates	Organic acids	Glycerate metabolism
HD12_revised_scaffold6399_3_gene20361	fig|411474.6.peg.2410__131__Sucrose_utilization__FruK__Fructokinase_(EC_2.7.1.4)	Carbohydrates	Di- and oligosaccharides	Sucrose utilization
HD8_revised_scaffold100073_1_gene152184	fig|411474.6.peg.2412__275__Uracil-DNA_glycosylase__UDG-2__G:T/U_mismatch-specific_uracil/thymine_DNA-glycosylase	DNA Metabolism	DNA repair	Uracil-DNA glycosylase
HD12_revised_scaffold43447_2_gene33940	fig|411474.6.peg.2439__658__DNA_repair,_bacterial__SbcD__Exonuclease_SbcD	DNA Metabolism	DNA repair	DNA repair, bacterial
HD12_revised_scaffold6794_8_gene6468	fig|411474.6.peg.247__327__coA-FolK__PPCDC__Phosphopantothenoylcysteine_decarboxylase_(EC_4.1.1.36)_/_Phosphopantothenoylcysteine_synthetase_(EC_6.3.2.5)	Cofactors, Vitamins, Prosthetic Groups, Pigments	Coenzyme A	coA-FolK
HD12_revised_scaffold4068_3_gene58535	fig|411474.6.peg.2486__1032__Mycobacterium_virulence_operon_possibly_involved_in_quinolinate_biosynthesis__Rv1596__Quinolinate_phosphoribosyltransferase_[decarboxylating]_(EC_2.4.2.19)	Virulence	-	Mycobacterium virulence operon possibly involved in quinolinate biosynthesis
HD12_revised_scaffold4068_3_gene58537	fig|411474.6.peg.2488__1032__Mycobacterium_virulence_operon_possibly_involved_in_quinolinate_biosynthesis__Rv1594__Quinolinate_synthetase_(EC_2.5.1.72)	Virulence	-	Mycobacterium virulence operon possibly involved in quinolinate biosynthesis
HD12_revised_scaffold4068_3_gene58544	fig|411474.6.peg.2495__676__De_Novo_Pyrimidine_Synthesis__pyrC__Dihydroorotase_(EC_3.5.2.3)	Nucleosides and Nucleotides	Pyrimidines	De Novo Pyrimidine Synthesis
HD12_revised_scaffold4068_3_gene58545	fig|411474.6.peg.2496__1243__Pyruvate_metabolism_II:_acetyl-CoA,_acetogenesis_from_pyruvate__APH__Acylphosphate_phosphohydrolase_(EC_3.6.1.7),_putative	Carbohydrates	Central carbohydrate metabolism	Pyruvate metabolism II: acetyl-CoA, acetogenesis from pyruvate
HD12_revised_scaffold4068_4_gene93556	fig|411474.6.peg.2503__1086__Oxidative_stress__RTH__Rubrerythrin	Stress Response	Oxidative stress	Oxidative stress
HD12_revised_scaffold4068_5_gene51173	fig|411474.6.peg.2507__676__De_Novo_Pyrimidine_Synthesis__pyrF__Orotidine_5-phosphate_decarboxylase_(EC_4.1.1.23)	Nucleosides and Nucleotides	Pyrimidines	De Novo Pyrimidine Synthesis
HD12_revised_scaffold4068_5_gene51174	fig|411474.6.peg.2508__676__De_Novo_Pyrimidine_Synthesis__pyrDe__Dihydroorotate_dehydrogenase_electron_transfer_subunit_(EC_1.3.3.1)	Nucleosides and Nucleotides	Pyrimidines	De Novo Pyrimidine Synthesis
HD51_revised_scaffold27442_1_gene13620	fig|411474.6.peg.2509__676__De_Novo_Pyrimidine_Synthesis__pyrDc__Dihydroorotate_dehydrogenase,_catalytic_subunit_(EC_1.3.3.1)	Nucleosides and Nucleotides	Pyrimidines	De Novo Pyrimidine Synthesis
HD12_revised_scaffold4068_5_gene51175	fig|411474.6.peg.2509__676__De_Novo_Pyrimidine_Synthesis__pyrDc__Dihydroorotate_dehydrogenase,_catalytic_subunit_(EC_1.3.3.1)	Nucleosides and Nucleotides	Pyrimidines	De Novo Pyrimidine Synthesis
HD12_revised_scaffold4068_5_gene51208	fig|411474.6.peg.2510__676__De_Novo_Pyrimidine_Synthesis__pyrE__Orotate_phosphoribosyltransferase_(EC_2.4.2.10)	Nucleosides and Nucleotides	Pyrimidines	De Novo Pyrimidine Synthesis
HD12_revised_scaffold4068_5_gene51210	fig|411474.6.peg.2512__216__Translation_termination_factors_bacterial__Map__Methionine_aminopeptidase_(EC_3.4.11.18)	Protein Metabolism	Protein biosynthesis	Translation termination factors bacterial
HD12_revised_scaffold4068_5_gene51211	fig|411474.6.peg.2513__1205__Protein_chaperones__HtpG__Chaperone_protein_HtpG	Protein Metabolism	Protein folding	Protein chaperones
HD12_revised_scaffold4068_24_gene106656	fig|411474.6.peg.2515__362__tRNA_aminoacylation,_Cys__Cys__Cysteinyl-tRNA_synthetase_(EC_6.1.1.16)	Protein Metabolism	Protein biosynthesis	tRNA aminoacylation, Cys
HD12_revised_scaffold4068_24_gene106653	fig|411474.6.peg.2518__107__Sporulation-associated_proteins_with_broader_functions__SigH__RNA_polymerase_sporulation_specific_sigma_factor_SigH	Dormancy and Sporulation	-	Sporulation-associated proteins with broader functions
HD35_revised_scaffold36798_3_gene164776	fig|411474.6.peg.2519__361__tRNA_aminoacylation,_Asp_and_Asn__Gln__Glutaminyl-tRNA_synthetase_(EC_6.1.1.18)	Protein Metabolism	Protein biosynthesis	tRNA aminoacylation, Asp and Asn
HD35_revised_scaffold36798_5_gene102738	fig|411474.6.peg.2527__996__Murein_hydrolase_regulation_and_cell_death__CDA__Cytidine_deaminase_(EC_3.5.4.5)	Regulation and Cell signaling	Programmed Cell Death and Toxin-antitoxin Systems	Murein hydrolase regulation and cell death
HD8_revised_scaffold112178_1_gene109321	fig|411474.6.peg.2530__432__CBSS-176299.4.peg.1292__R7__DNA_recombination_and_repair_protein_RecO	Clustering-based subsystems	Probably GTP or GMP signaling related	CBSS-176299.4.peg.1292
LD86_revised_C1011825_1_gene46055	fig|411474.6.peg.260__654__DNA_processing_cluster__Topo-III__DNA_topoisomerase_III_(EC_5.99.1.2)	DNA Metabolism	DNA uptake, competence	DNA processing cluster
HD35_revised_scaffold43907_1_gene42601	fig|411474.6.peg.283__759__Folate_Biosynthesis__FolK__Dihydroneopterin_aldolase_(EC_4.1.2.25)_/_2-amino-4-hydroxy-6-hydroxymethyldihydropteridine_pyrophosphokinase_(EC_2.7.6.3)	Cofactors, Vitamins, Prosthetic Groups, Pigments	Folate and pterines	Folate Biosynthesis
HD12_revised_scaffold6794_3_gene19216	fig|411474.6.peg.287__1180__Polysaccharide_deacetylases__Pgd__Peptidoglycan_N-acetylglucosamine_deacetylase_(EC_3.5.1.-)	Cell Wall and Capsule	Capsular and extracellular polysacchrides	Polysaccharide deacetylases
HD12_revised_scaffold2669_8_gene5127	fig|411474.6.peg.29__224__Trehalose_Biosynthesis__TS__Trehalose_synthase_(EC_5.4.99.16)	Carbohydrates	Di- and oligosaccharides	Trehalose Biosynthesis
HD38_revised_scaffold39258_1_gene10608	fig|411474.6.peg.292__190__Threonine_and_Homoserine_Biosynthesis__ThrB__Homoserine_kinase_(EC_2.7.1.39)	Amino Acids and Derivatives	Lysine, threonine, methionine, and cysteine	Threonine and Homoserine Biosynthesis
HD35_revised_scaffold92105_1_gene112400	fig|411474.6.peg.297__1209__Proteolysis_in_bacteria,_ATP-dependent__ClpX__ATP-dependent_Clp_protease_ATP-binding_subunit_ClpX	Protein Metabolism	Protein degradation	Proteolysis in bacteria, ATP-dependent
HD12_revised_scaffold6794_1_gene51526	fig|411474.6.peg.298__757__Flavohaemoglobin__P-II__Nitrogen_regulatory_protein_P-II	Stress Response	-	Flavohaemoglobin
HD35_revised_scaffold71391_1_gene79483	fig|411474.6.peg.300__1008__Ammonia_assimilation__amt__Ammonium_transporter	Nitrogen Metabolism	-	Ammonia assimilation
HD12_revised_scaffold6794_1_gene51522	fig|411474.6.peg.304__1102__Peptidoglycan_Biosynthesis__murF__UDP-N-acetylmuramoylalanyl-D-glutamyl-2,6-diaminopimelate--D-alanyl-D-alanine_ligase_(EC_6.3.2.10)	Cell Wall and Capsule	-	Peptidoglycan Biosynthesis
HD12_revised_scaffold6794_1_gene51521	fig|411474.6.peg.305__659__DNA_repair,_bacterial_DinG_and_relatives__CPE1197__DinG_family_ATP-dependent_helicase_CPE1197	DNA Metabolism	DNA repair	DNA repair, bacterial DinG and relatives
HD12_revised_scaffold6794_1_gene51506	fig|411474.6.peg.320__660__DNA_repair,_bacterial_MutL-MutS_system__MutS-fam1__MutS-related_protein,_family_1	DNA Metabolism	DNA repair	DNA repair, bacterial MutL-MutS system
HD35_revised_scaffold57076_5_gene69561	fig|411474.6.peg.33__1078__Omega-amidase_KE2__ArgJ__Glutamate_N-acetyltransferase_(EC_2.3.1.35)_/_N-acetylglutamate_synthase_(EC_2.3.1.1)	Miscellaneous	Plant-Prokaryote comparative genomics	Omega-amidase KE2
HD12_revised_scaffold6794_1_gene51495	fig|411474.6.peg.331__1070__Nudix_KE__YfcD__Putative_Nudix_hydrolase_YfcD_(EC_3.6.-.-)	Stress Response	Detoxification	Nudix KE
HD26_revised_scaffold13287_1_gene22272	fig|411474.6.peg.343__263__Universal_GTPases__TypA/BipA__GTP-binding_protein_TypA/BipA	Protein Metabolism	Protein biosynthesis	Universal GTPases
HD12_revised_scaffold2528_4_gene81677	fig|411474.6.peg.373__666__DNA_repair,_bacterial_UvrD_and_related_helicases__UvrD__ATP-dependent_DNA_helicase_UvrD/PcrA	DNA Metabolism	DNA repair	DNA repair, bacterial UvrD and related helicases
HD12_revised_scaffold2528_4_gene81667	fig|411474.6.peg.383__936__Macromolecular_synthesis_operon__rpoD__RNA_polymerase_sigma_factor_RpoD	Cell Division and Cell Cycle	-	Macromolecular synthesis operon
HD12_revised_scaffold2528_4_gene81666	fig|411474.6.peg.384__673__DNA-replication__dnaG__DNA_primase_(EC_2.7.7.-)	DNA Metabolism	DNA replication	DNA-replication
HD12_revised_scaffold2528_4_gene81665	fig|411474.6.peg.385__1222__Purine_conversions__detrhy__Deoxyguanosinetriphosphate_triphosphohydrolase_(EC_3.1.5.1)	Nucleosides and Nucleotides	Purines	Purine conversions
HD12_revised_scaffold2669_7_gene12415	fig|411474.6.peg.42__1233__Pyridoxin_(Vitamin_B6)_Biosynthesis__PdxS__Pyridoxine_biosynthesis_glutamine_amidotransferase,_synthase_subunit_(EC_2.4.2.-)	Cofactors, Vitamins, Prosthetic Groups, Pigments	Pyridoxine	Pyridoxin (Vitamin B6) Biosynthesis
HD12_revised_scaffold44479_1_gene40941	fig|411474.6.peg.426__83__Single-copy_ribosomal_proteins__L1p__LSU_ribosomal_protein_L1p_(L10Ae)	Protein Metabolism	Protein biosynthesis	Single-copy ribosomal proteins
HD26_revised_scaffold33621_1_gene20305	fig|411474.6.peg.436__1102__Peptidoglycan_Biosynthesis__murI__Glutamate_racemase_(EC_5.1.1.3)	Cell Wall and Capsule	-	Peptidoglycan Biosynthesis
HD26_revised_scaffold33621_1_gene20307	fig|411474.6.peg.437__1185__Arginine_and_Ornithine_Degradation__ArcB__Ornithine_cyclodeaminase_(EC_4.3.1.12)	Amino Acids and Derivatives	Arginine; urea cycle, polyamines	Arginine and Ornithine Degradation
HD12_revised_scaffold44479_1_gene40931	fig|411474.6.peg.437__1185__Arginine_and_Ornithine_Degradation__ArcB__Ornithine_cyclodeaminase_(EC_4.3.1.12)	Amino Acids and Derivatives	Arginine; urea cycle, polyamines	Arginine and Ornithine Degradation
HD12_revised_scaffold2669_7_gene12414	fig|411474.6.peg.44__673__DNA-replication__holA__DNA_polymerase_III_delta_subunit_(EC_2.7.7.7)	DNA Metabolism	DNA replication	DNA-replication
HD12_revised_scaffold44479_1_gene40928	fig|411474.6.peg.446__1221__Purine_Utilization__XP__Xanthine_permease	Nucleosides and Nucleotides	Purines	Purine Utilization
HD38_revised_scaffold1870_1_gene56162	fig|411474.6.peg.460__1243__Pyruvate_metabolism_II:_acetyl-CoA,_acetogenesis_from_pyruvate__CobB__NAD-dependent_protein_deacetylase_of_SIR2_family	Carbohydrates	Central carbohydrate metabolism	Pyruvate metabolism II: acetyl-CoA, acetogenesis from pyruvate
HD12_revised_scaffold2528_2_gene41697	fig|411474.6.peg.463__1205__Protein_chaperones__ClpB__ClpB_protein	Protein Metabolism	Protein folding	Protein chaperones
HD12_revised_scaffold2528_3_gene29299	fig|411474.6.peg.466__62__Serine_Biosynthesis__GlyA__Serine_hydroxymethyltransferase_(EC_2.1.2.1)	Amino Acids and Derivatives	Alanine, serine, and glycine	Serine Biosynthesis
HD12_revised_scaffold2528_3_gene29305	fig|411474.6.peg.472__1275__RP_Bacterial_Cell_Division__ftsH__Cell_division_protein_FtsH_(EC_3.4.24.-)	Clustering-based subsystems	-	RP Bacterial Cell Division
HD12_revised_scaffold2528_4_gene81663	fig|411474.6.peg.473__843__Housecleaning_nucleoside_triphosphate_pyrophosphatases__YfbR__Nucleotidase_YfbR,_HD_superfamily	Stress Response	Detoxification	Housecleaning nucleoside triphosphate pyrophosphatases
HD12_revised_scaffold2528_4_gene81664	fig|411474.6.peg.474__657__DNA_repair,_UvrABC_system__UvrC__Excinuclease_ABC_subunit_C	DNA Metabolism	DNA repair	DNA repair, UvrABC system
HD12_revised_scaffold4387_6_gene72147	fig|411474.6.peg.475__824__HPr_catabolite_repression_system__HPrK/P__HPr_kinase/phosphorylase_(EC_2.7.1.-)_(EC_2.7.4.-)	Regulation and Cell signaling	-	HPr catabolite repression system
HD12_revised_scaffold4387_6_gene72146	fig|411474.6.peg.476__809__Glycolysis_and_Gluconeogenesis__GlcK__Glucokinase_(EC_2.7.1.2)	Carbohydrates	Central carbohydrate metabolism	Glycolysis and Gluconeogenesis
HD12_revised_scaffold4387_6_gene72145	fig|411474.6.peg.477__1102__Peptidoglycan_Biosynthesis__murB__UDP-N-acetylenolpyruvoylglucosamine_reductase_(EC_1.1.1.158)	Cell Wall and Capsule	-	Peptidoglycan Biosynthesis
HD38_revised_scaffold36310_3_gene34175	fig|411474.6.peg.48__83__Single-copy_ribosomal_proteins__S20p__SSU_ribosomal_protein_S20p	Protein Metabolism	Protein biosynthesis	Single-copy ribosomal proteins
HD12_revised_scaffold4387_6_gene72136	fig|411474.6.peg.485__673__DNA-replication__dnaE__DNA_polymerase_III_alpha_subunit_(EC_2.7.7.7)	DNA Metabolism	DNA replication	DNA-replication
HD12_revised_scaffold2669_7_gene12411	fig|411474.6.peg.50__224__Trehalose_Biosynthesis__GBE__1,4-alpha-glucan_(glycogen)_branching_enzyme,_GH-13-type_(EC_2.4.1.18)	Carbohydrates	Di- and oligosaccharides	Trehalose Biosynthesis
HV31_revised_scaffold20542_1_gene42408	fig|411474.6.peg.51__598__Cold_shock,_CspA_family_of_proteins__CspD__Cold_shock_protein_CspD	Stress Response	Cold shock	Cold shock, CspA family of proteins
HD38_revised_scaffold8709_1_gene34574	fig|411474.6.peg.52__131__Sucrose_utilization__FruK__Fructokinase_(EC_2.7.1.4)	Carbohydrates	Di- and oligosaccharides	Sucrose utilization
HD12_revised_scaffold2669_7_gene12408	fig|411474.6.peg.53__131__Sucrose_utilization__ScrP__Sucrose_phosphorylase_(EC_2.4.1.7)	Carbohydrates	Di- and oligosaccharides	Sucrose utilization
HD38_revised_scaffold18418_1_gene40053	fig|411474.6.peg.550__361__tRNA_aminoacylation,_Asp_and_Asn__AatC__Aspartyl-tRNA(Asn)_amidotransferase_subunit_C_(EC_6.3.5.6)_@_Glutamyl-tRNA(Gln)_amidotransferase_subunit_C_(EC_6.3.5.7)	Protein Metabolism	Protein biosynthesis	tRNA aminoacylation, Asp and Asn
HD12_revised_scaffold2669_7_gene12402	fig|411474.6.peg.61__1244__Pyruvate:ferredoxin_oxidoreductase__PFORa__Pyruvate:ferredoxin_oxidoreductase,_alpha_subunit_(EC_1.2.7.1)	Carbohydrates	Central carbohydrate metabolism	Pyruvate:ferredoxin oxidoreductase
HD18_revised_scaffold18223_2_gene20932	fig|411474.6.peg.649__756__Flavodoxin__Fla__Flavodoxin	Cofactors, Vitamins, Prosthetic Groups, Pigments	Riboflavin, FMN, FAD	Flavodoxin
HV6_revised_scaffold3877_4_gene96841	fig|411474.6.peg.659__375__tRNA_aminoacylation,_Trp__Trp__Tryptophanyl-tRNA_synthetase_(EC_6.1.1.2)	Protein Metabolism	Protein biosynthesis	tRNA aminoacylation, Trp
HD35_revised_scaffold57076_16_gene47710	fig|411474.6.peg.68__898__Lactose_utilization__LacA__Galactoside_O-acetyltransferase_(EC_2.3.1.18)	Carbohydrates	Di- and oligosaccharides	Lactose utilization
HD8_revised_scaffold108560_1_gene136870	fig|411474.6.peg.689__315__2-phosphoglycolate_salvage__PGPase__Phosphoglycolate_phosphatase_(EC_3.1.3.18)	DNA Metabolism	DNA repair	2-phosphoglycolate salvage
HD18_revised_scaffold7590_1_gene67782	fig|411474.6.peg.696__759__Folate_Biosynthesis__pabAc__Aminodeoxychorismate_lyase_(EC_4.1.3.38)_*_PabAc	Cofactors, Vitamins, Prosthetic Groups, Pigments	Folate and pterines	Folate Biosynthesis
HD8_revised_scaffold108560_1_gene136857	fig|411474.6.peg.703__837__High_affinity_phosphate_transporter_and_control_of_PHO_regulon__PhoU__Phosphate_transport_system_regulatory_protein_PhoU	Phosphorus Metabolism	-	High affinity phosphate transporter and control of PHO regulon
HD35_revised_scaffold25505_3_gene95905	fig|411474.6.peg.766__379__tRNA_modification_Archaea__s2C__tRNA(Cytosine32)-2-thiocytidine_synthetase	RNA Metabolism	RNA processing and modification	tRNA modification Archaea
LD54_revised_C712449_1_gene47622	fig|411474.6.peg.775__611__Copper_homeostasis__CIA__Lead,_cadmium,_zinc_and_mercury_transporting_ATPase_(EC_3.6.3.3)_(EC_3.6.3.5);_Copper-translocating_P-type_ATPase_(EC_3.6.3.4)	Virulence	Resistance to antibiotics and toxic compounds	Copper homeostasis
HD12_revised_scaffold14789_1_gene19752	fig|411474.6.peg.822__626__Cysteine_Biosynthesis__CysK__Cysteine_synthase_(EC_2.5.1.47)	Amino Acids and Derivatives	Lysine, threonine, methionine, and cysteine	Cysteine Biosynthesis
HD12_revised_scaffold14789_1_gene19725	fig|411474.6.peg.848__22__Ribonucleotide_reduction__RNRIII__Ribonucleotide_reductase_of_class_III_(anaerobic),_large_subunit_(EC_1.17.4.2)	Nucleosides and Nucleotides	-	Ribonucleotide reduction
HD12_revised_scaffold14789_1_gene19724	fig|411474.6.peg.849__675__De_Novo_Purine_Biosynthesis__PurC__Phosphoribosylaminoimidazole-succinocarboxamide_synthase_(EC_6.3.2.6)	Nucleosides and Nucleotides	Purines	De Novo Purine Biosynthesis
HD12_revised_scaffold2669_7_gene12334	fig|411474.6.peg.85__1275__RP_Bacterial_Cell_Division__mraZ__Cell_division_protein_MraZ	Clustering-based subsystems	-	RP Bacterial Cell Division
HV6_revised_scaffold28537_5_gene61628	fig|411474.6.peg.859__1233__Pyridoxin_(Vitamin_B6)_Biosynthesis__PdxK__Pyridoxal_kinase_(EC_2.7.1.35)	Cofactors, Vitamins, Prosthetic Groups, Pigments	Pyridoxine	Pyridoxin (Vitamin B6) Biosynthesis
HD12_revised_scaffold2669_7_gene12333	fig|411474.6.peg.86__1275__RP_Bacterial_Cell_Division__mraW__rRNA_small_subunit_methyltransferase_H	Clustering-based subsystems	-	RP Bacterial Cell Division
HD12_revised_scaffold14789_1_gene19698	fig|411474.6.peg.870__1233__Pyridoxin_(Vitamin_B6)_Biosynthesis__PdxK__Pyridoxal_kinase_(EC_2.7.1.35)	Cofactors, Vitamins, Prosthetic Groups, Pigments	Pyridoxine	Pyridoxin (Vitamin B6) Biosynthesis
HD8_revised_scaffold113507_1_gene156346	fig|411474.6.peg.886__190__Threonine_and_Homoserine_Biosynthesis__ThrA__Aspartokinase_(EC_2.7.2.4)	Amino Acids and Derivatives	Lysine, threonine, methionine, and cysteine	Threonine and Homoserine Biosynthesis
HD12_revised_scaffold2669_7_gene12330	fig|411474.6.peg.89__1102__Peptidoglycan_Biosynthesis__FtsI__Cell_division_protein_FtsI_[Peptidoglycan_synthetase]_(EC_2.4.1.129)	Cell Wall and Capsule	-	Peptidoglycan Biosynthesis
HD12_revised_scaffold2669_7_gene12329	fig|411474.6.peg.90__1102__Peptidoglycan_Biosynthesis__mraY__Phospho-N-acetylmuramoyl-pentapeptide-transferase_(EC_2.7.8.13)	Cell Wall and Capsule	-	Peptidoglycan Biosynthesis
HD12_revised_scaffold2669_7_gene12328	fig|411474.6.peg.91__1102__Peptidoglycan_Biosynthesis__murD__UDP-N-acetylmuramoylalanine--D-glutamate_ligase_(EC_6.3.2.9)	Cell Wall and Capsule	-	Peptidoglycan Biosynthesis
HD35_revised_scaffold47412_3_gene138862	fig|411474.6.peg.915__779__Galactosylceramide_and_Sulfatide_metabolism__bGS__Beta-galactosidase_(EC_3.2.1.23)	Sulfur Metabolism	-	Galactosylceramide and Sulfatide metabolism
HV31_revised_scaffold8587_1_gene4739	fig|411474.6.peg.915__779__Galactosylceramide_and_Sulfatide_metabolism__bGS__Beta-galactosidase_(EC_3.2.1.23)	Sulfur Metabolism	-	Galactosylceramide and Sulfatide metabolism
HD38_revised_scaffold25521_1_gene8052	fig|411474.6.peg.916__255__UDP-N-acetylmuramate_from_Fructose-6-phosphate_Biosynthesis__GA6PS__Glucosamine--fructose-6-phosphate_aminotransferase_[isomerizing]_(EC_2.6.1.16)	Cell Wall and Capsule	-	UDP-N-acetylmuramate from Fructose-6-phosphate Biosynthesis
HD35_revised_scaffold4477_1_gene7150	fig|411474.6.peg.916__255__UDP-N-acetylmuramate_from_Fructose-6-phosphate_Biosynthesis__GA6PS__Glucosamine--fructose-6-phosphate_aminotransferase_[isomerizing]_(EC_2.6.1.16)	Cell Wall and Capsule	-	UDP-N-acetylmuramate from Fructose-6-phosphate Biosynthesis
HD37_revised_scaffold51814_1_gene7670	fig|411474.6.peg.916__763__Formaldehyde_assimilation:_Ribulose_monophosphate_pathway__GAPS__Glucosamine--fructose-6-phosphate_aminotransferase_[isomerizing]_(EC_2.6.1.16)	Carbohydrates	One-carbon Metabolism	Formaldehyde assimilation: Ribulose monophosphate pathway
HV6_revised_scaffold8743_2_gene40171	fig|411474.6.peg.916__763__Formaldehyde_assimilation:_Ribulose_monophosphate_pathway__GAPS__Glucosamine--fructose-6-phosphate_aminotransferase_[isomerizing]_(EC_2.6.1.16)	Carbohydrates	One-carbon Metabolism	Formaldehyde assimilation: Ribulose monophosphate pathway
HD35_revised_scaffold30263_4_gene98465	fig|411474.6.peg.916__763__Formaldehyde_assimilation:_Ribulose_monophosphate_pathway__GAPS__Glucosamine--fructose-6-phosphate_aminotransferase_[isomerizing]_(EC_2.6.1.16)	Carbohydrates	One-carbon Metabolism	Formaldehyde assimilation: Ribulose monophosphate pathway
HD12_revised_scaffold2669_7_gene12327	fig|411474.6.peg.92__1275__RP_Bacterial_Cell_Division__ftsW__Cell_division_protein_FtsW	Clustering-based subsystems	-	RP Bacterial Cell Division
HD38_revised_scaffold14177_2_gene6714	fig|411474.6.peg.921__1088__Oxygen_stress_response_/_Human_gut_microbiome__Trx__Thioredoxin	Stress Response	Oxidative stress	Oxygen stress response / Human gut microbiome
HD51_revised_scaffold4282_2_gene45213	fig|411474.6.peg.925__676__De_Novo_Pyrimidine_Synthesis__uraA__Uracil_permease	Nucleosides and Nucleotides	Pyrimidines	De Novo Pyrimidine Synthesis
HD12_revised_scaffold2669_7_gene12323	fig|411474.6.peg.96__829__Alanine_biosynthesis__AlaR__Alanine_racemase_(EC_5.1.1.1)	Amino Acids and Derivatives	Alanine, serine, and glycine	Alanine biosynthesis
HV31_revised_C348135_1_gene28357	fig|411474.6.peg.975__996__Murein_hydrolase_regulation_and_cell_death__lrgA__Antiholin-like_protein_LrgA	Regulation and Cell signaling	Programmed Cell Death and Toxin-antitoxin Systems	Murein hydrolase regulation and cell death
HD12_revised_scaffold25361_1_gene27104	fig|411474.6.peg.978__1008__Ammonia_assimilation__amt__Ammonium_transporter	Nitrogen Metabolism	-	Ammonia assimilation
HD12_revised_scaffold2669_7_gene12321	fig|411474.6.peg.98__1229__Putative_hemin_transporter__HL__Hemolysins_and_related_proteins_containing_CBS_domains	Clustering-based subsystems	-	Putative hemin transporter
HD12_revised_scaffold2669_7_gene12320	fig|411474.6.peg.99__168__Test_-_Riboflavin__YebC__FIG000859:_hypothetical_protein_YebC	Cofactors, Vitamins, Prosthetic Groups, Pigments	Riboflavin, FMN, FAD	Test - Riboflavin
HD38_revised_scaffold29272_1_gene9443	fig|411474.6.peg.991__79__Signal_peptidase__LepB__Signal_peptidase_I_(EC_3.4.21.89)	Protein Metabolism	Protein processing and modification	Signal peptidase
HD8_revised_scaffold9469_6_gene106164	fig|411475.3.peg.2066__1143__Phosphate_metabolism__PhoB__Phosphate_regulon_transcriptional_regulatory_protein_PhoB_(SphR)	Phosphorus Metabolism	-	Phosphate metabolism
HD37_revised_C896232_1_gene14011	fig|411477.4.peg.721__898__Lactose_utilization__LacA__Galactoside_O-acetyltransferase_(EC_2.3.1.18)	Carbohydrates	Di- and oligosaccharides	Lactose utilization
LD45_revised_scaffold15676_2_gene57725	fig|411481.5.peg.173__14__Rhamnose_containing_glycans__1__Glucose-1-phosphate_thymidylyltransferase_(EC_2.7.7.24)	Cell Wall and Capsule	Capsular and extracellular polysacchrides	Rhamnose containing glycans
LD85_revised_scaffold21171_4_gene54484	fig|411481.5.peg.2019__224__Trehalose_Biosynthesis__TS__Trehalose_synthase_(EC_5.4.99.16)	Carbohydrates	Di- and oligosaccharides	Trehalose Biosynthesis
LD33_revised_scaffold52415_1_gene28241	fig|411481.5.peg.946__711__ECF_class_transporters__PdxUt__Transmembrane_component_of_energizing_module_of_predicted_pyridoxine-related_ECF_transporter	Membrane Transport	-	ECF class transporters
HD5_revised_scaffold26323_3_gene12896	fig|411485.10.peg.2298__48__SCIFF_peptide_maturase_system__scfB__SCIFF_radical_SAM_maturase	Protein Metabolism	Protein processing and modification	SCIFF peptide maturase system
HD1_revised_scaffold42030_1_gene52067	fig|411486.3.peg.1047__494__CBSS-393121.3.peg.2760__R1__hypothetical_protein_BH3604	Clustering-based subsystems	Protein export?	CBSS-393121.3.peg.2760
HD47_revised_scaffold40544_2_gene20449	fig|411486.3.peg.3383__570__Choline_and_Betaine_Uptake_and_Betaine_Biosynthesis__ChA__Choline_binding_protein_A	Stress Response	Osmotic stress	Choline and Betaine Uptake and Betaine Biosynthesis
HD16_revised_scaffold10600_1_gene80138	fig|411486.3.peg.3562__1229__Putative_hemin_transporter__MT__Magnesium_transporter	Clustering-based subsystems	-	Putative hemin transporter
HD8_revised_scaffold40505_4_gene102019	fig|411486.3.peg.3562__1229__Putative_hemin_transporter__MT__Magnesium_transporter	Clustering-based subsystems	-	Putative hemin transporter
HD12_revised_scaffold2669_8_gene5135	fig|411489.7.peg.1120__1276__Raj_MurE__AmiA__N-acetylmuramoyl-L-alanine_amidase_(EC_3.5.1.28)	Cell Wall and Capsule	-	Raj MurE
HD43_revised_scaffold3809_1_gene73329	fig|411489.7.peg.1159__1275__RP_Bacterial_Cell_Division__ftsH__Cell_division_protein_FtsH_(EC_3.4.24.-)	Clustering-based subsystems	-	RP Bacterial Cell Division
HD12_revised_scaffold4387_6_gene72142	fig|411489.7.peg.1167__824__HPr_catabolite_repression_system__Crh__Catabolite_repression_HPr-like_protein_Crh	Regulation and Cell signaling	-	HPr catabolite repression system
HD12_revised_scaffold4068_24_gene106659	fig|411489.7.peg.1367__494__CBSS-393121.3.peg.2760__R4__Protein_export_cytoplasm_protein_SecA_ATPase_RNA_helicase_(TC_3.A.5.1.1)	Clustering-based subsystems	Protein export?	CBSS-393121.3.peg.2760
HD12_revised_scaffold4068_5_gene51218	fig|411489.7.peg.1375__1102__Peptidoglycan_Biosynthesis__murE__UDP-N-acetylmuramoylalanyl-D-glutamate--2,6-diaminopimelate_ligase_(EC_6.3.2.13)	Cell Wall and Capsule	-	Peptidoglycan Biosynthesis
HD12_revised_scaffold4068_5_gene51234	fig|411489.7.peg.1391__554__Cell_envelope-associated_LytR-CpsA-Psr_transcriptional_attenuators__F2__Cell_envelope-associated_transcriptional_attenuator_LytR-CpsA-Psr,_subfamily_F2_(as_in_PMID19099556)	Regulation and Cell signaling	-	Cell envelope-associated LytR-CpsA-Psr transcriptional attenuators
HD12_revised_scaffold171_2_gene73600	fig|411489.7.peg.1431__654__DNA_processing_cluster__Topo-III__DNA_topoisomerase_III_(EC_5.99.1.2)	DNA Metabolism	DNA uptake, competence	DNA processing cluster
HD12_revised_scaffold171_3_gene72748	fig|411489.7.peg.1431__654__DNA_processing_cluster__Topo-III__DNA_topoisomerase_III_(EC_5.99.1.2)	DNA Metabolism	DNA uptake, competence	DNA processing cluster
HD38_revised_scaffold7090_6_gene36175	fig|411489.7.peg.1469__235__Two_cell_division_clusters_relating_to_chromosome_partitioning__ParB__Chromosome_(plasmid)_partitioning_protein_ParB	Cell Division and Cell Cycle	-	Two cell division clusters relating to chromosome partitioning
HD35_revised_scaffold21977_2_gene171052	fig|411489.7.peg.147__757__Flavohaemoglobin__IscU_67__Iron-sulfur_cluster_assembly_scaffold_protein_IscU	Stress Response	-	Flavohaemoglobin
HD12_revised_scaffold171_2_gene73615	fig|411489.7.peg.1528__793__Glutathione-regulated_potassium-efflux_system_and_associated_functions__HGH__Hydroxyacylglutathione_hydrolase_(EC_3.1.2.6)	Potassium metabolism	-	Glutathione-regulated potassium-efflux system and associated functions
HD1_revised_scaffold42047_1_gene50912	fig|411489.7.peg.162__873__Isoprenoid_Biosynthesis__DXS__1-deoxy-D-xylulose_5-phosphate_synthase_(EC_2.2.1.7)	Fatty Acids, Lipids, and Isoprenoids	Isoprenoids	Isoprenoid Biosynthesis
LD82_revised_scaffold86340_1_gene109312	fig|411489.7.peg.1690__829__Alanine_biosynthesis__AlaR__Alanine_racemase_(EC_5.1.1.1)	Amino Acids and Derivatives	Alanine, serine, and glycine	Alanine biosynthesis
HD38_revised_scaffold33265_1_gene41597	fig|411489.7.peg.1942__1086__Oxidative_stress__RTH__Rubrerythrin	Stress Response	Oxidative stress	Oxidative stress
HD38_revised_scaffold20693_1_gene37031	fig|411489.7.peg.535__802__Glycerolipid_and_Glycerophospholipid_Metabolism_in_Bacteria__plsC__1-acyl-sn-glycerol-3-phosphate_acyltransferase_(EC_2.3.1.51)	Fatty Acids, Lipids, and Isoprenoids	Phospholipids	Glycerolipid and Glycerophospholipid Metabolism in Bacteria
HD12_revised_scaffold4068_24_gene106670	fig|411489.7.peg.600__207__Transcription_factors_bacterial__Rho__Transcription_termination_factor_Rho	RNA Metabolism	Transcription	Transcription factors bacterial
HD35_revised_scaffold41059_9_gene139029	fig|411489.7.peg.600__207__Transcription_factors_bacterial__Rho__Transcription_termination_factor_Rho	RNA Metabolism	Transcription	Transcription factors bacterial
HD37_revised_scaffold51814_1_gene7668	fig|411489.7.peg.641__1164__Arginine_Biosynthesis_extended__ArgH__Argininosuccinate_lyase_(EC_4.3.2.1)	Amino Acids and Derivatives	Arginine; urea cycle, polyamines	Arginine Biosynthesis extended
HD12_revised_scaffold4068_18_gene67344	fig|411489.7.peg.660__87__Soluble_cytochromes_and_functionally_related_electron_carriers__Fx__Ferredoxin	Respiration	-	Soluble cytochromes and functionally related electron carriers
HD35_revised_scaffold34139_6_gene127831	fig|411489.7.peg.849__432__CBSS-176299.4.peg.1292__R2__Signal_peptidase_I_(EC_3.4.21.89)	Clustering-based subsystems	Probably GTP or GMP signaling related	CBSS-176299.4.peg.1292
HD38_revised_scaffold31945_1_gene16959	fig|411489.7.peg.909__1272__RNA_processing_and_degradation,_bacterial__NrnA__FIG146085:_3-to-5_oligoribonuclease_A,_Bacillus_type	RNA Metabolism	RNA processing and modification	RNA processing and degradation, bacterial
HD37_revised_scaffold51814_1_gene7672	fig|411489.7.peg.920__1205__Protein_chaperones__HtpG__Chaperone_protein_HtpG	Protein Metabolism	Protein folding	Protein chaperones
HD38_revised_scaffold15141_1_gene56365	fig|411490.6.peg.1488__611__Copper_homeostasis__CIA__Lead,_cadmium,_zinc_and_mercury_transporting_ATPase_(EC_3.6.3.3)_(EC_3.6.3.5);_Copper-translocating_P-type_ATPase_(EC_3.6.3.4)	Virulence	Resistance to antibiotics and toxic compounds	Copper homeostasis
LD75_revised_scaffold16843_2_gene141142	fig|411490.6.peg.860__658__DNA_repair,_bacterial__LexA__SOS-response_repressor_and_protease_LexA_(EC_3.4.21.88)	DNA Metabolism	DNA repair	DNA repair, bacterial
HD35_revised_scaffold82182_4_gene31526	fig|411901.7.peg.1150__779__Galactosylceramide_and_Sulfatide_metabolism__bGS__Beta-galactosidase_(EC_3.2.1.23)	Sulfur Metabolism	-	Galactosylceramide and Sulfatide metabolism
HD38_revised_scaffold42120_1_gene53840	fig|411901.7.peg.12__199__Ton_and_Tol_transport_systems__TonBR__TonB-dependent_receptor	Membrane Transport	-	Ton and Tol transport systems
HD35_revised_scaffold40679_4_gene122241	fig|411901.7.peg.1424__779__Galactosylceramide_and_Sulfatide_metabolism__bGS__Beta-galactosidase_(EC_3.2.1.23)	Sulfur Metabolism	-	Galactosylceramide and Sulfatide metabolism
HD8_revised_scaffold108978_2_gene91221	fig|411902.9.peg.5518__1175__Polyamine_Metabolism__SPERta__Putrescine_transport_ATP-binding_protein_PotA_(TC_3.A.1.11.1)	Amino Acids and Derivatives	Arginine; urea cycle, polyamines	Polyamine Metabolism
LD61_revised_scaffold20311_2_gene42376	fig|411903.6.peg.1155__12__Restriction-Modification_System__HsdS__Type_I_restriction-modification_system,_specificity_subunit_S_(EC_3.1.21.3)	DNA Metabolism	-	Restriction-Modification System
LD33_revised_scaffold51845_3_gene10296	fig|412022.9.peg.438__752__Flagellum__fliK__Flagellar_hook-length_control_protein_FliK	Motility and Chemotaxis	Flagellar motility in Prokaryota	Flagellum
LD33_revised_scaffold47999_1_gene55969	fig|412614.3.peg.1200__743__Fatty_acid_degradation_regulons__FadH__2,4-dienoyl-CoA_reductase_[NADPH]_(EC_1.3.1.34)	Fatty Acids, Lipids, and Isoprenoids	Fatty acids	Fatty acid degradation regulons
HD12_revised_scaffold44048_1_gene80552	fig|412883.3.peg.1141__633__Cytolysin_and_Lipase_operon_in_Vibrio__lipA__Lipase_precursor_(EC_3.1.1.3)	Virulence, Disease and Defense	Invasion and intracellular resistance	Cytolysin and Lipase operon in Vibrio
LD85_revised_scaffold4826_1_gene50258	fig|412966.10.peg.2305__633__Cytolysin_and_Lipase_operon_in_Vibrio__lipA__Lipase_precursor_(EC_3.1.1.3)	Virulence, Disease and Defense	Invasion and intracellular resistance	Cytolysin and Lipase operon in Vibrio
LD82_revised_scaffold52010_1_gene1298	fig|413999.4.peg.2736__315__2-phosphoglycolate_salvage__PGPase__Phosphoglycolate_phosphatase_(EC_3.1.3.18)	DNA Metabolism	DNA repair	2-phosphoglycolate salvage
LD21_revised_C333877_1_gene26085	fig|41431.3.peg.3039__10__At1g26220_At1g32070__SecD__Protein-export_membrane_protein_SecD_(TC_3.A.5.1.1)	Predictions based on plant-prokaryote comparative analysis	-	At1g26220 At1g32070
HD51_revised_C692718_1_gene93439	fig|420247.6.peg.182__45__Rubrerythrin__Rdx__Rubredoxin	Stress Response	Oxidative stress	Rubrerythrin
LD45_revised_scaffold4652_1_gene17019	fig|420890.5.peg.457__1246__Queuosine_exploration_RZ__Trans4__Permease_of_the_drug/metabolite_transporter_(DMT)_superfamily	RNA Metabolism	RNA processing and modification	Queuosine exploration RZ
HD35_revised_scaffold106674_2_gene84931	fig|428125.8.peg.1019__235__Two_cell_division_clusters_relating_to_chromosome_partitioning__ParB__Chromosome_(plasmid)_partitioning_protein_ParB	Cell Division and Cell Cycle	-	Two cell division clusters relating to chromosome partitioning
HD16_revised_scaffold10600_1_gene80149	fig|428125.8.peg.1257__1275__RP_Bacterial_Cell_Division__ftsE__Cell_division_transporter,_ATP-binding_protein_FtsE_(TC_3.A.5.1.1)	Clustering-based subsystems	-	RP Bacterial Cell Division
HD16_revised_scaffold10600_1_gene80150	fig|428125.8.peg.1258__1275__RP_Bacterial_Cell_Division__ftsX__Cell_division_protein_FtsX	Clustering-based subsystems	-	RP Bacterial Cell Division
HD16_revised_scaffold55375_1_gene80322	fig|428125.8.peg.1355__1073__NusA-TFII_Cluster__COG0779__FIG000325:_clustered_with_transcription_termination_protein_NusA	Clustering-based subsystems	-	NusA-TFII Cluster
HD16_revised_scaffold55375_1_gene80321	fig|428125.8.peg.1356__1073__NusA-TFII_Cluster__NusA__Transcription_termination_protein_NusA	Clustering-based subsystems	-	NusA-TFII Cluster
HD5_revised_scaffold46_2_gene40765	fig|428125.8.peg.1359__1073__NusA-TFII_Cluster__TF2__Translation_initiation_factor_2	Clustering-based subsystems	-	NusA-TFII Cluster
HD5_revised_scaffold46_3_gene44725	fig|428125.8.peg.1360__1073__NusA-TFII_Cluster__RbfA__Ribosome-binding_factor_A	Clustering-based subsystems	-	NusA-TFII Cluster
HD35_revised_scaffold83771_3_gene83314	fig|428125.8.peg.1545__98__Spore_germination__GerKA__Spore_germination_protein_GerKA	Dormancy and Sporulation	-	Spore germination
HD5_revised_scaffold54289_1_gene34426	fig|428125.8.peg.1846__79__Signal_peptidase__LepB__Signal_peptidase_I_(EC_3.4.21.89)	Protein Metabolism	Protein processing and modification	Signal peptidase
HD22_revised_scaffold7317_9_gene37814	fig|428125.8.peg.1847__263__Universal_GTPases__RbgA__50S_ribosomal_subunit_maturation_GTPase_RbgA_(B._subtilis_YlqF)	Protein Metabolism	Protein biosynthesis	Universal GTPases
HD16_revised_scaffold10600_1_gene80126	fig|428125.8.peg.1940__969__Methionine_Biosynthesis__HSST__Homoserine_O-succinyltransferase_(EC_2.3.1.46)	Amino Acids and Derivatives	Lysine, threonine, methionine, and cysteine	Methionine Biosynthesis
HD5_revised_scaffold26133_1_gene52634	fig|428125.8.peg.2050__917__Lipoprotein_Biosynthesis__Lgt__Prolipoprotein_diacylglyceryl_transferase_(EC_2.4.99.-)	Protein Metabolism	Protein processing and modification	Lipoprotein Biosynthesis
HD5_revised_scaffold26133_1_gene52627	fig|428125.8.peg.2060__494__CBSS-393121.3.peg.2760__R1__hypothetical_protein_BH3604	Clustering-based subsystems	Protein export?	CBSS-393121.3.peg.2760
HD16_revised_scaffold74_2_gene8268	fig|428125.8.peg.2093__22__Ribonucleotide_reduction__RNRTR__Ribonucleotide_reductase_transcriptional_regulator_NrdR	Nucleosides and Nucleotides	-	Ribonucleotide reduction
HD16_revised_scaffold74_2_gene8243	fig|428125.8.peg.2541__757__Flavohaemoglobin__SHMT__Serine_hydroxymethyltransferase_(EC_2.1.2.1)	Stress Response	-	Flavohaemoglobin
HD16_revised_scaffold36537_2_gene44989	fig|428125.8.peg.2584__1078__Omega-amidase_KE2__AspAT__Biosynthetic_Aromatic_amino_acid_aminotransferase_alpha_(EC_2.6.1.57)_@_Aspartate_aminotransferase_(EC_2.6.1.1)	Miscellaneous	Plant-Prokaryote comparative genomics	Omega-amidase KE2
HD65_revised_C530011_1_gene111935	fig|428125.8.peg.261__658__DNA_repair,_bacterial__LexA__SOS-response_repressor_and_protease_LexA_(EC_3.4.21.88)	DNA Metabolism	DNA repair	DNA repair, bacterial
LD44_revised_scaffold15075_1_gene20077	fig|428125.8.peg.261__658__DNA_repair,_bacterial__LexA__SOS-response_repressor_and_protease_LexA_(EC_3.4.21.88)	DNA Metabolism	DNA repair	DNA repair, bacterial
LD33_revised_scaffold50776_7_gene37625	fig|428125.8.peg.2627__888__L-fucose_utilization__Fucase__Alpha-L-fucosidase_(EC_3.2.1.51)	Carbohydrates	Monosaccharides	L-fucose utilization
LD4_revised_scaffold5961_2_gene37692	fig|428125.8.peg.2896__788__Glutamine,_Glutamate,_Aspartate_and_Asparagine_Biosynthesis__AsnB1__Asparagine_synthetase_[glutamine-hydrolyzing]_(EC_6.3.5.4)	Amino Acids and Derivatives	Glutamine, glutamate, aspartate, asparagine; ammonia assimilation	Glutamine, Glutamate, Aspartate and Asparagine Biosynthesis
HD16_revised_scaffold10600_1_gene80142	fig|428125.8.peg.2934__263__Universal_GTPases__YchF__GTP-binding_and_nucleic_acid-binding_protein_YchF	Protein Metabolism	Protein biosynthesis	Universal GTPases
HD5_revised_scaffold30114_6_gene26433	fig|428125.8.peg.3096__802__Glycerolipid_and_Glycerophospholipid_Metabolism_in_Bacteria__Dak__Dihydroxyacetone_kinase_family_protein	Fatty Acids, Lipids, and Isoprenoids	Phospholipids	Glycerolipid and Glycerophospholipid Metabolism in Bacteria
HD16_revised_scaffold55316_1_gene5143	fig|428125.8.peg.321__97__Spore_Core_Dehydration__SmpB__Spore_maturation_protein_B	Dormancy and Sporulation	-	Spore Core Dehydration
HD5_revised_scaffold51604_5_gene80792	fig|428125.8.peg.35__168__Test_-_Riboflavin__PyrD?__tRNA-specific_adenosine-34_deaminase_(EC_3.5.4.-)	Cofactors, Vitamins, Prosthetic Groups, Pigments	Riboflavin, FMN, FAD	Test - Riboflavin
HD16_revised_C715285_1_gene22761	fig|428125.8.peg.412__807__Glycogen_metabolism__GBr__1,4-alpha-glucan_(glycogen)_branching_enzyme,_GH-13-type_(EC_2.4.1.18)	Carbohydrates	Polysaccharides	Glycogen metabolism
HD16_revised_C715285_1_gene22760	fig|428125.8.peg.413__807__Glycogen_metabolism__GAT_C__Glucose-1-phosphate_adenylyltransferase_(EC_2.7.7.27)	Carbohydrates	Polysaccharides	Glycogen metabolism
HD16_revised_C715285_1_gene22759	fig|428125.8.peg.414__807__Glycogen_metabolism__GAT_D__Glycogen_biosynthesis_protein_GlgD,_glucose-1-phosphate_adenylyltransferase_family	Carbohydrates	Polysaccharides	Glycogen metabolism
HD16_revised_C715285_1_gene22758	fig|428125.8.peg.415__807__Glycogen_metabolism__GS__Glycogen_synthase,_ADP-glucose_transglucosylase_(EC_2.4.1.21)	Carbohydrates	Polysaccharides	Glycogen metabolism
HD16_revised_scaffold11112_2_gene113767	fig|428125.8.peg.419__116__Streptococcal_Hyaluronic_Acid_Capsule__hasC__UTP--glucose-1-phosphate_uridylyltransferase_(EC_2.7.7.9)	Cell Wall and Capsule	Capsular and extracellular polysacchrides	Streptococcal Hyaluronic Acid Capsule
HD16_revised_scaffold11112_2_gene113763	fig|428125.8.peg.421__1189__Programmed_frameshift__RF-2__Peptide_chain_release_factor_2	Protein Metabolism	Protein biosynthesis	Programmed frameshift
HD35_revised_scaffold61269_1_gene25570	fig|428125.8.peg.45__424__Branched-Chain_Amino_Acid_Biosynthesis__IlvG__Acetolactate_synthase_large_subunit_(EC_2.2.1.6)	Amino Acids and Derivatives	Branched-chain amino acids	Branched-Chain Amino Acid Biosynthesis
HD16_revised_scaffold11112_2_gene113762	fig|428125.8.peg.613__190__Threonine_and_Homoserine_Biosynthesis__HSKpr__Predicted_functional_analog_of_homoserine_kinase_(EC_2.7.1.-)	Amino Acids and Derivatives	Lysine, threonine, methionine, and cysteine	Threonine and Homoserine Biosynthesis
HD16_revised_scaffold10145_1_gene87406	fig|428125.8.peg.987__1070__Nudix_KE__Dut__Deoxyuridine_5-triphosphate_nucleotidohydrolase_(EC_3.6.1.23)	Stress Response	Detoxification	Nudix KE
HD51_revised_scaffold13581_2_gene72451	fig|428126.7.peg.1736__1180__Polysaccharide_deacetylases__Pgd__Peptidoglycan_N-acetylglucosamine_deacetylase_(EC_3.5.1.-)	Cell Wall and Capsule	Capsular and extracellular polysacchrides	Polysaccharide deacetylases
LD62_revised_C288375_1_gene15305	fig|428126.7.peg.495__350__pyrimidine_conversions__cytk__Cytidylate_kinase_(EC_2.7.4.25)	Nucleosides and Nucleotides	Pyrimidines	pyrimidine conversions
HD8_revised_scaffold103173_1_gene149303	fig|428128.7.peg.140__361__tRNA_aminoacylation,_Asp_and_Asn__AatA__Aspartyl-tRNA(Asn)_amidotransferase_subunit_A_(EC_6.3.5.6)_@_Glutamyl-tRNA(Gln)_amidotransferase_subunit_A_(EC_6.3.5.7)	Protein Metabolism	Protein biosynthesis	tRNA aminoacylation, Asp and Asn
HD1_revised_scaffold42047_1_gene50925	fig|428128.7.peg.1482__995__Murein_Hydrolases__AmiA__N-acetylmuramoyl-L-alanine_amidase_(EC_3.5.1.28)	Cell Wall and Capsule	-	Murein Hydrolases
HD8_revised_scaffold103173_1_gene149321	fig|428128.7.peg.150__572__Chorismate_Synthesis__AroAIa__2-keto-3-deoxy-D-arabino-heptulosonate-7-phosphate_synthase_I_alpha_(EC_2.5.1.54)_**_AroA_I_alpha	Amino Acids and Derivatives	Aromatic amino acids and derivatives	Chorismate Synthesis
HD8_revised_scaffold53309_2_gene186535	fig|428128.7.peg.2043__1242__Pyruvate_metabolism_I:_anaplerotic_reactions,_PEP__PEPCK-GTP__Phosphoenolpyruvate_carboxykinase_[GTP]_(EC_4.1.1.32)	Carbohydrates	Central carbohydrate metabolism	Pyruvate metabolism I: anaplerotic reactions, PEP
HD18_revised_scaffold2437_1_gene60022	fig|428128.7.peg.2213__711__ECF_class_transporters__BL0693__Duplicated_ATPase_component_BL0693_of_energizing_module_of_predicted_ECF_transporter	Membrane Transport	-	ECF class transporters
HD18_revised_C789016_1_gene38388	fig|428128.7.peg.2213__711__ECF_class_transporters__BL0693__Duplicated_ATPase_component_BL0693_of_energizing_module_of_predicted_ECF_transporter	Membrane Transport	-	ECF class transporters
HD1_revised_scaffold42030_1_gene52044	fig|428128.7.peg.328__279__V-Type_ATP_synthase__I__V-type_ATP_synthase_subunit_I_(EC_3.6.3.14)	Respiration	ATP synthases	V-Type ATP synthase
HD12_revised_scaffold44048_1_gene80528	fig|428128.7.peg.690__14__Rhamnose_containing_glycans__10__Teichoic_acid_export_ATP-binding_protein_TagH_(EC_3.6.3.40)	Cell Wall and Capsule	Capsular and extracellular polysacchrides	Rhamnose containing glycans
HD83_revised_scaffold17258_1_gene99488	fig|428128.7.peg.942__664__DNA_repair,_bacterial_RecFOR_pathway__Ssb__Single-stranded_DNA-binding_protein	DNA Metabolism	DNA repair	DNA repair, bacterial RecFOR pathway
HD1_revised_scaffold42030_1_gene52137	fig|431943.4.peg.1097__551__ABC_transporter_oligopeptide_(TC_3.A.1.5.1)__oppF__Oligopeptide_transport_ATP-binding_protein_OppF_(TC_3.A.1.5.1)	Membrane Transport	ABC transporters	ABC transporter oligopeptide (TC 3.A.1.5.1)
HD38_revised_scaffold3436_2_gene30725	fig|431943.4.peg.1692__658__DNA_repair,_bacterial__LexA__SOS-response_repressor_and_protease_LexA_(EC_3.4.21.88)	DNA Metabolism	DNA repair	DNA repair, bacterial
[truncated: 2,814 more rows]
